# Supplementary material for: A cross-kingdom conserved ER-phagy receptor maintains endoplasmic reticulum homeostasis during stress
Source: eLife. 2020 Aug 27;9:e58396. doi: 10.7554/eLife.58396 (PMC7515635; doi:10.7554/eLife.58396)
Supplement: Supplementary file 1. [file elife-58396-supp1.xlsx]

## Sheet: Peptide Map
Table S1. Peptide array map. High density peptide array analysis was performed commercially by PEPperPRINT
Peptide Map GVSEWDPILEELQEM Substitution Scan - Protein GST-ATG8A (PEP201752521)
Microarray Content:	Full substitution scan of peptide GVSEWDPILEELQEM with exchange of all amino acid positions by 23 amino acids including citrulline (Z), methyl-alanine (O) and D-alanine (U)
	Additional N- and C-terminal deletion series of wild type peptide GVSEWDPILEELQEM
	Additional acidic variants of control peptide KPLDFDWEIVLEEQM
Sample:	Protein GST-ATG8A
Peptide Length:	1 aa - 15 aa
Number of Peptides:	416
Number of Spots:	1,412 (peptides printed at least in triplicate)
HA Control:	YPYDVPDYAG	88 Spots
Custom Control:	KPLDFDWEIVLEEQ	32 Spots
GST-ATG8A, 10 µg/ml		1	2	3	4	5	6	7	8	9	10	11	12	13	14	15	16	17	18	19	20	21	22	23	24	25	26	27	28	29	30	31	32	33	34	35	36	37	38	39	40	41	42	43	44	45	46	47	48
	YPYDVPDYAG	G	YPYDVPDYAG	G	YPYDVPDYAG	G	YPYDVPDYAG	G	YPYDVPDYAG	G	YPYDVPDYAG	G	YPYDVPDYAG	G	YPYDVPDYAG	G	YPYDVPDYAG	G	YPYDVPDYAG	G	YPYDVPDYAG	G	YPYDVPDYAG	G	YPYDVPDYAG	G	YPYDVPDYAG	G	YPYDVPDYAG	G	YPYDVPDYAG	G	YPYDVPDYAG	G	YPYDVPDYAG	G	YPYDVPDYAG	G	YPYDVPDYAG	G	YPYDVPDYAG	G	YPYDVPDYAG	G	YPYDVPDYAG	G	YPYDVPDYAG	G	YPYDVPDYAG
1	YPYDVPDYAG	GVSEWDPILEELQEA	GVSEWDPILEELQEC	GVSEWDPILEELQED	GVSEWDPILEELQEE	GVSEWDPILEELQEF	GVSEWDPILEELQEG	GVSEWDPILEELQEH	GVSEWDPILEELQEI	GVSEWDPILEELQEK	GVSEWDPILEELQEL	GVSEWDPILEELQEM	GVSEWDPILEELQEN	GVSEWDPILEELQEP	GVSEWDPILEELQEQ	GVSEWDPILEELQER	GVSEWDPILEELQES	GVSEWDPILEELQET	GVSEWDPILEELQEV	GVSEWDPILEELQEW	GVSEWDPILEELQEY	GVSEWDPILEELQEZ	GVSEWDPILEELQEO	GVSEWDPILEELQEU	KPLDFDWEIVLEEQM	GVSEWDPILEELQEA	GVSEWDPILEELQEC	GVSEWDPILEELQED	GVSEWDPILEELQEE	GVSEWDPILEELQEF	GVSEWDPILEELQEG	GVSEWDPILEELQEH	GVSEWDPILEELQEI	GVSEWDPILEELQEK	GVSEWDPILEELQEL	GVSEWDPILEELQEM	GVSEWDPILEELQEN	GVSEWDPILEELQEP	GVSEWDPILEELQEQ	GVSEWDPILEELQER	GVSEWDPILEELQES	GVSEWDPILEELQET	GVSEWDPILEELQEV	GVSEWDPILEELQEW	GVSEWDPILEELQEY	GVSEWDPILEELQEZ	GVSEWDPILEELQEO	GVSEWDPILEELQEU
2	G	GVSEWDPILEELQAM	GVSEWDPILEELQCM	GVSEWDPILEELQDM	GVSEWDPILEELQEM	GVSEWDPILEELQFM	GVSEWDPILEELQGM	GVSEWDPILEELQHM	GVSEWDPILEELQIM	GVSEWDPILEELQKM	GVSEWDPILEELQLM	GVSEWDPILEELQMM	GVSEWDPILEELQNM	GVSEWDPILEELQPM	GVSEWDPILEELQQM	GVSEWDPILEELQRM	GVSEWDPILEELQSM	GVSEWDPILEELQTM	GVSEWDPILEELQVM	GVSEWDPILEELQWM	GVSEWDPILEELQYM	GVSEWDPILEELQZM	GVSEWDPILEELQOM	GVSEWDPILEELQUM	G	GVSEWDPILEELQAM	GVSEWDPILEELQCM	GVSEWDPILEELQDM	GVSEWDPILEELQEM	GVSEWDPILEELQFM	GVSEWDPILEELQGM	GVSEWDPILEELQHM	GVSEWDPILEELQIM	GVSEWDPILEELQKM	GVSEWDPILEELQLM	GVSEWDPILEELQMM	GVSEWDPILEELQNM	GVSEWDPILEELQPM	GVSEWDPILEELQQM	GVSEWDPILEELQRM	GVSEWDPILEELQSM	GVSEWDPILEELQTM	GVSEWDPILEELQVM	GVSEWDPILEELQWM	GVSEWDPILEELQYM	GVSEWDPILEELQZM	GVSEWDPILEELQOM	GVSEWDPILEELQUM
3	YPYDVPDYAG	GVSEWDPILEELAEM	GVSEWDPILEELCEM	GVSEWDPILEELDEM	GVSEWDPILEELEEM	GVSEWDPILEELFEM	GVSEWDPILEELGEM	GVSEWDPILEELHEM	GVSEWDPILEELIEM	GVSEWDPILEELKEM	GVSEWDPILEELLEM	GVSEWDPILEELMEM	GVSEWDPILEELNEM	GVSEWDPILEELPEM	GVSEWDPILEELQEM	GVSEWDPILEELREM	GVSEWDPILEELSEM	GVSEWDPILEELTEM	GVSEWDPILEELVEM	GVSEWDPILEELWEM	GVSEWDPILEELYEM	GVSEWDPILEELZEM	GVSEWDPILEELOEM	GVSEWDPILEELUEM	KPLDFDWEIVLEEQM	GVSEWDPILEELAEM	GVSEWDPILEELCEM	GVSEWDPILEELDEM	GVSEWDPILEELEEM	GVSEWDPILEELFEM	GVSEWDPILEELGEM	GVSEWDPILEELHEM	GVSEWDPILEELIEM	GVSEWDPILEELKEM	GVSEWDPILEELLEM	GVSEWDPILEELMEM	GVSEWDPILEELNEM	GVSEWDPILEELPEM	GVSEWDPILEELQEM	GVSEWDPILEELREM	GVSEWDPILEELSEM	GVSEWDPILEELTEM	GVSEWDPILEELVEM	GVSEWDPILEELWEM	GVSEWDPILEELYEM	GVSEWDPILEELZEM	GVSEWDPILEELOEM	GVSEWDPILEELUEM
4	G	GVSEWDPILEEAQEM	GVSEWDPILEECQEM	GVSEWDPILEEDQEM	GVSEWDPILEEEQEM	GVSEWDPILEEFQEM	GVSEWDPILEEGQEM	GVSEWDPILEEHQEM	GVSEWDPILEEIQEM	GVSEWDPILEEKQEM	GVSEWDPILEELQEM	GVSEWDPILEEMQEM	GVSEWDPILEENQEM	GVSEWDPILEEPQEM	GVSEWDPILEEQQEM	GVSEWDPILEERQEM	GVSEWDPILEESQEM	GVSEWDPILEETQEM	GVSEWDPILEEVQEM	GVSEWDPILEEWQEM	GVSEWDPILEEYQEM	GVSEWDPILEEZQEM	GVSEWDPILEEOQEM	GVSEWDPILEEUQEM	G	GVSEWDPILEEAQEM	GVSEWDPILEECQEM	GVSEWDPILEEDQEM	GVSEWDPILEEEQEM	GVSEWDPILEEFQEM	GVSEWDPILEEGQEM	GVSEWDPILEEHQEM	GVSEWDPILEEIQEM	GVSEWDPILEEKQEM	GVSEWDPILEELQEM	GVSEWDPILEEMQEM	GVSEWDPILEENQEM	GVSEWDPILEEPQEM	GVSEWDPILEEQQEM	GVSEWDPILEERQEM	GVSEWDPILEESQEM	GVSEWDPILEETQEM	GVSEWDPILEEVQEM	GVSEWDPILEEWQEM	GVSEWDPILEEYQEM	GVSEWDPILEEZQEM	GVSEWDPILEEOQEM	GVSEWDPILEEUQEM
5	YPYDVPDYAG	GVSEWDPILEALQEM	GVSEWDPILECLQEM	GVSEWDPILEDLQEM	GVSEWDPILEELQEM	GVSEWDPILEFLQEM	GVSEWDPILEGLQEM	GVSEWDPILEHLQEM	GVSEWDPILEILQEM	GVSEWDPILEKLQEM	GVSEWDPILELLQEM	GVSEWDPILEMLQEM	GVSEWDPILENLQEM	GVSEWDPILEPLQEM	GVSEWDPILEQLQEM	GVSEWDPILERLQEM	GVSEWDPILESLQEM	GVSEWDPILETLQEM	GVSEWDPILEVLQEM	GVSEWDPILEWLQEM	GVSEWDPILEYLQEM	GVSEWDPILEZLQEM	GVSEWDPILEOLQEM	GVSEWDPILEULQEM	KPLDFDWEIVLEEQM	GVSEWDPILEALQEM	GVSEWDPILECLQEM	GVSEWDPILEDLQEM	GVSEWDPILEELQEM	GVSEWDPILEFLQEM	GVSEWDPILEGLQEM	GVSEWDPILEHLQEM	GVSEWDPILEILQEM	GVSEWDPILEKLQEM	GVSEWDPILELLQEM	GVSEWDPILEMLQEM	GVSEWDPILENLQEM	GVSEWDPILEPLQEM	GVSEWDPILEQLQEM	GVSEWDPILERLQEM	GVSEWDPILESLQEM	GVSEWDPILETLQEM	GVSEWDPILEVLQEM	GVSEWDPILEWLQEM	GVSEWDPILEYLQEM	GVSEWDPILEZLQEM	GVSEWDPILEOLQEM	GVSEWDPILEULQEM
6	G	GVSEWDPILAELQEM	GVSEWDPILCELQEM	GVSEWDPILDELQEM	GVSEWDPILEELQEM	GVSEWDPILFELQEM	GVSEWDPILGELQEM	GVSEWDPILHELQEM	GVSEWDPILIELQEM	GVSEWDPILKELQEM	GVSEWDPILLELQEM	GVSEWDPILMELQEM	GVSEWDPILNELQEM	GVSEWDPILPELQEM	GVSEWDPILQELQEM	GVSEWDPILRELQEM	GVSEWDPILSELQEM	GVSEWDPILTELQEM	GVSEWDPILVELQEM	GVSEWDPILWELQEM	GVSEWDPILYELQEM	GVSEWDPILZELQEM	GVSEWDPILOELQEM	GVSEWDPILUELQEM	G	GVSEWDPILAELQEM	GVSEWDPILCELQEM	GVSEWDPILDELQEM	GVSEWDPILEELQEM	GVSEWDPILFELQEM	GVSEWDPILGELQEM	GVSEWDPILHELQEM	GVSEWDPILIELQEM	GVSEWDPILKELQEM	GVSEWDPILLELQEM	GVSEWDPILMELQEM	GVSEWDPILNELQEM	GVSEWDPILPELQEM	GVSEWDPILQELQEM	GVSEWDPILRELQEM	GVSEWDPILSELQEM	GVSEWDPILTELQEM	GVSEWDPILVELQEM	GVSEWDPILWELQEM	GVSEWDPILYELQEM	GVSEWDPILZELQEM	GVSEWDPILOELQEM	GVSEWDPILUELQEM
7	YPYDVPDYAG	GVSEWDPIAEELQEM	GVSEWDPICEELQEM	GVSEWDPIDEELQEM	GVSEWDPIEEELQEM	GVSEWDPIFEELQEM	GVSEWDPIGEELQEM	GVSEWDPIHEELQEM	GVSEWDPIIEELQEM	GVSEWDPIKEELQEM	GVSEWDPILEELQEM	GVSEWDPIMEELQEM	GVSEWDPINEELQEM	GVSEWDPIPEELQEM	GVSEWDPIQEELQEM	GVSEWDPIREELQEM	GVSEWDPISEELQEM	GVSEWDPITEELQEM	GVSEWDPIVEELQEM	GVSEWDPIWEELQEM	GVSEWDPIYEELQEM	GVSEWDPIZEELQEM	GVSEWDPIOEELQEM	GVSEWDPIUEELQEM	KPLDFDWEIVLEEQM	GVSEWDPIAEELQEM	GVSEWDPICEELQEM	GVSEWDPIDEELQEM	GVSEWDPIEEELQEM	GVSEWDPIFEELQEM	GVSEWDPIGEELQEM	GVSEWDPIHEELQEM	GVSEWDPIIEELQEM	GVSEWDPIKEELQEM	GVSEWDPILEELQEM	GVSEWDPIMEELQEM	GVSEWDPINEELQEM	GVSEWDPIPEELQEM	GVSEWDPIQEELQEM	GVSEWDPIREELQEM	GVSEWDPISEELQEM	GVSEWDPITEELQEM	GVSEWDPIVEELQEM	GVSEWDPIWEELQEM	GVSEWDPIYEELQEM	GVSEWDPIZEELQEM	GVSEWDPIOEELQEM	GVSEWDPIUEELQEM
8	G	GVSEWDPALEELQEM	GVSEWDPCLEELQEM	GVSEWDPDLEELQEM	GVSEWDPELEELQEM	GVSEWDPFLEELQEM	GVSEWDPGLEELQEM	GVSEWDPHLEELQEM	GVSEWDPILEELQEM	GVSEWDPKLEELQEM	GVSEWDPLLEELQEM	GVSEWDPMLEELQEM	GVSEWDPNLEELQEM	GVSEWDPPLEELQEM	GVSEWDPQLEELQEM	GVSEWDPRLEELQEM	GVSEWDPSLEELQEM	GVSEWDPTLEELQEM	GVSEWDPVLEELQEM	GVSEWDPWLEELQEM	GVSEWDPYLEELQEM	GVSEWDPZLEELQEM	GVSEWDPOLEELQEM	GVSEWDPULEELQEM	G	GVSEWDPALEELQEM	GVSEWDPCLEELQEM	GVSEWDPDLEELQEM	GVSEWDPELEELQEM	GVSEWDPFLEELQEM	GVSEWDPGLEELQEM	GVSEWDPHLEELQEM	GVSEWDPILEELQEM	GVSEWDPKLEELQEM	GVSEWDPLLEELQEM	GVSEWDPMLEELQEM	GVSEWDPNLEELQEM	GVSEWDPPLEELQEM	GVSEWDPQLEELQEM	GVSEWDPRLEELQEM	GVSEWDPSLEELQEM	GVSEWDPTLEELQEM	GVSEWDPVLEELQEM	GVSEWDPWLEELQEM	GVSEWDPYLEELQEM	GVSEWDPZLEELQEM	GVSEWDPOLEELQEM	GVSEWDPULEELQEM
9	YPYDVPDYAG	GVSEWDAILEELQEM	GVSEWDCILEELQEM	GVSEWDDILEELQEM	GVSEWDEILEELQEM	GVSEWDFILEELQEM	GVSEWDGILEELQEM	GVSEWDHILEELQEM	GVSEWDIILEELQEM	GVSEWDKILEELQEM	GVSEWDLILEELQEM	GVSEWDMILEELQEM	GVSEWDNILEELQEM	GVSEWDPILEELQEM	GVSEWDQILEELQEM	GVSEWDRILEELQEM	GVSEWDSILEELQEM	GVSEWDTILEELQEM	GVSEWDVILEELQEM	GVSEWDWILEELQEM	GVSEWDYILEELQEM	GVSEWDZILEELQEM	GVSEWDOILEELQEM	GVSEWDUILEELQEM	KPLDFDWEIVLEEQM	GVSEWDAILEELQEM	GVSEWDCILEELQEM	GVSEWDDILEELQEM	GVSEWDEILEELQEM	GVSEWDFILEELQEM	GVSEWDGILEELQEM	GVSEWDHILEELQEM	GVSEWDIILEELQEM	GVSEWDKILEELQEM	GVSEWDLILEELQEM	GVSEWDMILEELQEM	GVSEWDNILEELQEM	GVSEWDPILEELQEM	GVSEWDQILEELQEM	GVSEWDRILEELQEM	GVSEWDSILEELQEM	GVSEWDTILEELQEM	GVSEWDVILEELQEM	GVSEWDWILEELQEM	GVSEWDYILEELQEM	GVSEWDZILEELQEM	GVSEWDOILEELQEM	GVSEWDUILEELQEM
10	G	GVSEWAPILEELQEM	GVSEWCPILEELQEM	GVSEWDPILEELQEM	GVSEWEPILEELQEM	GVSEWFPILEELQEM	GVSEWGPILEELQEM	GVSEWHPILEELQEM	GVSEWIPILEELQEM	GVSEWKPILEELQEM	GVSEWLPILEELQEM	GVSEWMPILEELQEM	GVSEWNPILEELQEM	GVSEWPPILEELQEM	GVSEWQPILEELQEM	GVSEWRPILEELQEM	GVSEWSPILEELQEM	GVSEWTPILEELQEM	GVSEWVPILEELQEM	GVSEWWPILEELQEM	GVSEWYPILEELQEM	GVSEWZPILEELQEM	GVSEWOPILEELQEM	GVSEWUPILEELQEM		GVSEWAPILEELQEM	GVSEWCPILEELQEM	GVSEWDPILEELQEM	GVSEWEPILEELQEM	GVSEWFPILEELQEM	GVSEWGPILEELQEM	GVSEWHPILEELQEM	GVSEWIPILEELQEM	GVSEWKPILEELQEM	GVSEWLPILEELQEM	GVSEWMPILEELQEM	GVSEWNPILEELQEM	GVSEWPPILEELQEM	GVSEWQPILEELQEM	GVSEWRPILEELQEM	GVSEWSPILEELQEM	GVSEWTPILEELQEM	GVSEWVPILEELQEM	GVSEWWPILEELQEM	GVSEWYPILEELQEM	GVSEWZPILEELQEM	GVSEWOPILEELQEM	GVSEWUPILEELQEM
11	YPYDVPDYAG	GVSEADPILEELQEM	GVSECDPILEELQEM	GVSEDDPILEELQEM	GVSEEDPILEELQEM	GVSEFDPILEELQEM	GVSEGDPILEELQEM	GVSEHDPILEELQEM	GVSEIDPILEELQEM	GVSEKDPILEELQEM	GVSELDPILEELQEM	GVSEMDPILEELQEM	GVSENDPILEELQEM	GVSEPDPILEELQEM	GVSEQDPILEELQEM	GVSERDPILEELQEM	GVSESDPILEELQEM	GVSETDPILEELQEM	GVSEVDPILEELQEM	GVSEWDPILEELQEM	GVSEYDPILEELQEM	GVSEZDPILEELQEM	GVSEODPILEELQEM	GVSEUDPILEELQEM		GVSEADPILEELQEM	GVSECDPILEELQEM	GVSEDDPILEELQEM	GVSEEDPILEELQEM	GVSEFDPILEELQEM	GVSEGDPILEELQEM	GVSEHDPILEELQEM	GVSEIDPILEELQEM	GVSEKDPILEELQEM	GVSELDPILEELQEM	GVSEMDPILEELQEM	GVSENDPILEELQEM	GVSEPDPILEELQEM	GVSEQDPILEELQEM	GVSERDPILEELQEM	GVSESDPILEELQEM	GVSETDPILEELQEM	GVSEVDPILEELQEM	GVSEWDPILEELQEM	GVSEYDPILEELQEM	GVSEZDPILEELQEM	GVSEODPILEELQEM	GVSEUDPILEELQEM
12	G	GVSAWDPILEELQEM	GVSCWDPILEELQEM	GVSDWDPILEELQEM	GVSEWDPILEELQEM	GVSFWDPILEELQEM	GVSGWDPILEELQEM	GVSHWDPILEELQEM	GVSIWDPILEELQEM	GVSKWDPILEELQEM	GVSLWDPILEELQEM	GVSMWDPILEELQEM	GVSNWDPILEELQEM	GVSPWDPILEELQEM	GVSQWDPILEELQEM	GVSRWDPILEELQEM	GVSSWDPILEELQEM	GVSTWDPILEELQEM	GVSVWDPILEELQEM	GVSWWDPILEELQEM	GVSYWDPILEELQEM	GVSZWDPILEELQEM	GVSOWDPILEELQEM	GVSUWDPILEELQEM		GVSAWDPILEELQEM	GVSCWDPILEELQEM	GVSDWDPILEELQEM	GVSEWDPILEELQEM	GVSFWDPILEELQEM	GVSGWDPILEELQEM	GVSHWDPILEELQEM	GVSIWDPILEELQEM	GVSKWDPILEELQEM	GVSLWDPILEELQEM	GVSMWDPILEELQEM	GVSNWDPILEELQEM	GVSPWDPILEELQEM	GVSQWDPILEELQEM	GVSRWDPILEELQEM	GVSSWDPILEELQEM	GVSTWDPILEELQEM	GVSVWDPILEELQEM	GVSWWDPILEELQEM	GVSYWDPILEELQEM	GVSZWDPILEELQEM	GVSOWDPILEELQEM	GVSUWDPILEELQEM
13	YPYDVPDYAG	GVAEWDPILEELQEM	GVCEWDPILEELQEM	GVDEWDPILEELQEM	GVEEWDPILEELQEM	GVFEWDPILEELQEM	GVGEWDPILEELQEM	GVHEWDPILEELQEM	GVIEWDPILEELQEM	GVKEWDPILEELQEM	GVLEWDPILEELQEM	GVMEWDPILEELQEM	GVNEWDPILEELQEM	GVPEWDPILEELQEM	GVQEWDPILEELQEM	GVREWDPILEELQEM	GVSEWDPILEELQEM	GVTEWDPILEELQEM	GVVEWDPILEELQEM	GVWEWDPILEELQEM	GVYEWDPILEELQEM	GVZEWDPILEELQEM	GVOEWDPILEELQEM	GVUEWDPILEELQEM		GVAEWDPILEELQEM	GVCEWDPILEELQEM	GVDEWDPILEELQEM	GVEEWDPILEELQEM	GVFEWDPILEELQEM	GVGEWDPILEELQEM	GVHEWDPILEELQEM	GVIEWDPILEELQEM	GVKEWDPILEELQEM	GVLEWDPILEELQEM	GVMEWDPILEELQEM	GVNEWDPILEELQEM	GVPEWDPILEELQEM	GVQEWDPILEELQEM	GVREWDPILEELQEM	GVSEWDPILEELQEM	GVTEWDPILEELQEM	GVVEWDPILEELQEM	GVWEWDPILEELQEM	GVYEWDPILEELQEM	GVZEWDPILEELQEM	GVOEWDPILEELQEM	GVUEWDPILEELQEM
14	G	GASEWDPILEELQEM	GCSEWDPILEELQEM	GDSEWDPILEELQEM	GESEWDPILEELQEM	GFSEWDPILEELQEM	GGSEWDPILEELQEM	GHSEWDPILEELQEM	GISEWDPILEELQEM	GKSEWDPILEELQEM	GLSEWDPILEELQEM	GMSEWDPILEELQEM	GNSEWDPILEELQEM	GPSEWDPILEELQEM	GQSEWDPILEELQEM	GRSEWDPILEELQEM	GSSEWDPILEELQEM	GTSEWDPILEELQEM	GVSEWDPILEELQEM	GWSEWDPILEELQEM	GYSEWDPILEELQEM	GZSEWDPILEELQEM	GOSEWDPILEELQEM	GUSEWDPILEELQEM		GASEWDPILEELQEM	GCSEWDPILEELQEM	GDSEWDPILEELQEM	GESEWDPILEELQEM	GFSEWDPILEELQEM	GGSEWDPILEELQEM	GHSEWDPILEELQEM	GISEWDPILEELQEM	GKSEWDPILEELQEM	GLSEWDPILEELQEM	GMSEWDPILEELQEM	GNSEWDPILEELQEM	GPSEWDPILEELQEM	GQSEWDPILEELQEM	GRSEWDPILEELQEM	GSSEWDPILEELQEM	GTSEWDPILEELQEM	GVSEWDPILEELQEM	GWSEWDPILEELQEM	GYSEWDPILEELQEM	GZSEWDPILEELQEM	GOSEWDPILEELQEM	GUSEWDPILEELQEM
15	YPYDVPDYAG	AVSEWDPILEELQEM	CVSEWDPILEELQEM	DVSEWDPILEELQEM	EVSEWDPILEELQEM	FVSEWDPILEELQEM	GVSEWDPILEELQEM	HVSEWDPILEELQEM	IVSEWDPILEELQEM	KVSEWDPILEELQEM	LVSEWDPILEELQEM	MVSEWDPILEELQEM	NVSEWDPILEELQEM	PVSEWDPILEELQEM	QVSEWDPILEELQEM	RVSEWDPILEELQEM	SVSEWDPILEELQEM	TVSEWDPILEELQEM	VVSEWDPILEELQEM	WVSEWDPILEELQEM	YVSEWDPILEELQEM	ZVSEWDPILEELQEM	OVSEWDPILEELQEM	UVSEWDPILEELQEM		AVSEWDPILEELQEM	CVSEWDPILEELQEM	DVSEWDPILEELQEM	EVSEWDPILEELQEM	FVSEWDPILEELQEM	GVSEWDPILEELQEM	HVSEWDPILEELQEM	IVSEWDPILEELQEM	KVSEWDPILEELQEM	LVSEWDPILEELQEM	MVSEWDPILEELQEM	NVSEWDPILEELQEM	PVSEWDPILEELQEM	QVSEWDPILEELQEM	RVSEWDPILEELQEM	SVSEWDPILEELQEM	TVSEWDPILEELQEM	VVSEWDPILEELQEM	WVSEWDPILEELQEM	YVSEWDPILEELQEM	ZVSEWDPILEELQEM	OVSEWDPILEELQEM	UVSEWDPILEELQEM
16	G	KPLDFDWEIVLEEQM	G	KPLDFDWEIVLEEQM	G	KPLDFDWEIVLEEQM	G	KPLDFDWEIVLEEQM	G	KPLDFDWEIVLEEQM																																					KPLDFDWEIVLEEQM	G	KPLDFDWEIVLEEQM
17	YPYDVPDYAG	GVSEWDPILEELQEA	GVSEWDPILEELQEC	GVSEWDPILEELQED	GVSEWDPILEELQEE	GVSEWDPILEELQEF	GVSEWDPILEELQEG	GVSEWDPILEELQEH	GVSEWDPILEELQEI	GVSEWDPILEELQEK	GVSEWDPILEELQEL	GVSEWDPILEELQEM	GVSEWDPILEELQEN	GVSEWDPILEELQEP	GVSEWDPILEELQEQ	GVSEWDPILEELQER	GVSEWDPILEELQES	GVSEWDPILEELQET	GVSEWDPILEELQEV	GVSEWDPILEELQEW	GVSEWDPILEELQEY	GVSEWDPILEELQEZ	GVSEWDPILEELQEO	GVSEWDPILEELQEU		GVSEWDPILEELQEM	GVSEWDPILEELQE	GVSEWDPILEELQ	GVSEWDPILEEL	GVSEWDPILEE	GVSEWDPILE	GVSEWDPIL	GVSEWDPI	GVSEWDP	GVSEWD	GVSEW	GVSE	GVS	GV	G	GVSEWDPILEELQEM	VSEWDPILEELQEM	SEWDPILEELQEM	EWDPILEELQEM	WDPILEELQEM	DPILEELQEM	PILEELQEM	ILEELQEM	LEELQEM
18	G	GVSEWDPILEELQAM	GVSEWDPILEELQCM	GVSEWDPILEELQDM	GVSEWDPILEELQEM	GVSEWDPILEELQFM	GVSEWDPILEELQGM	GVSEWDPILEELQHM	GVSEWDPILEELQIM	GVSEWDPILEELQKM	GVSEWDPILEELQLM	GVSEWDPILEELQMM	GVSEWDPILEELQNM	GVSEWDPILEELQPM	GVSEWDPILEELQQM	GVSEWDPILEELQRM	GVSEWDPILEELQSM	GVSEWDPILEELQTM	GVSEWDPILEELQVM	GVSEWDPILEELQWM	GVSEWDPILEELQYM	GVSEWDPILEELQZM	GVSEWDPILEELQOM	GVSEWDPILEELQUM		GVSEWDPILEELQEM	GVSEWDPILEELQE	GVSEWDPILEELQ	GVSEWDPILEEL	GVSEWDPILEE	GVSEWDPILE	GVSEWDPIL	GVSEWDPI	GVSEWDP	GVSEWD	GVSEW	GVSE	GVS	GV	G	GVSEWDPILEELQEM	VSEWDPILEELQEM	SEWDPILEELQEM	EWDPILEELQEM	WDPILEELQEM	DPILEELQEM	PILEELQEM	ILEELQEM	LEELQEM
19	YPYDVPDYAG	GVSEWDPILEELAEM	GVSEWDPILEELCEM	GVSEWDPILEELDEM	GVSEWDPILEELEEM	GVSEWDPILEELFEM	GVSEWDPILEELGEM	GVSEWDPILEELHEM	GVSEWDPILEELIEM	GVSEWDPILEELKEM	GVSEWDPILEELLEM	GVSEWDPILEELMEM	GVSEWDPILEELNEM	GVSEWDPILEELPEM	GVSEWDPILEELQEM	GVSEWDPILEELREM	GVSEWDPILEELSEM	GVSEWDPILEELTEM	GVSEWDPILEELVEM	GVSEWDPILEELWEM	GVSEWDPILEELYEM	GVSEWDPILEELZEM	GVSEWDPILEELOEM	GVSEWDPILEELUEM		GVSEWDPILEELQEM	GVSEWDPILEELQE	GVSEWDPILEELQ	GVSEWDPILEEL	GVSEWDPILEE	GVSEWDPILE	GVSEWDPIL	GVSEWDPI	GVSEWDP	GVSEWD	GVSEW	GVSE	GVS	GV	G	GVSEWDPILEELQEM	VSEWDPILEELQEM	SEWDPILEELQEM	EWDPILEELQEM	WDPILEELQEM	DPILEELQEM	PILEELQEM	ILEELQEM	LEELQEM
20	G	GVSEWDPILEEAQEM	GVSEWDPILEECQEM	GVSEWDPILEEDQEM	GVSEWDPILEEEQEM	GVSEWDPILEEFQEM	GVSEWDPILEEGQEM	GVSEWDPILEEHQEM	GVSEWDPILEEIQEM	GVSEWDPILEEKQEM	GVSEWDPILEELQEM	GVSEWDPILEEMQEM	GVSEWDPILEENQEM	GVSEWDPILEEPQEM	GVSEWDPILEEQQEM	GVSEWDPILEERQEM	GVSEWDPILEESQEM	GVSEWDPILEETQEM	GVSEWDPILEEVQEM	GVSEWDPILEEWQEM	GVSEWDPILEEYQEM	GVSEWDPILEEZQEM	GVSEWDPILEEOQEM	GVSEWDPILEEUQEM
21	YPYDVPDYAG	GVSEWDPILEALQEM	GVSEWDPILECLQEM	GVSEWDPILEDLQEM	GVSEWDPILEELQEM	GVSEWDPILEFLQEM	GVSEWDPILEGLQEM	GVSEWDPILEHLQEM	GVSEWDPILEILQEM	GVSEWDPILEKLQEM	GVSEWDPILELLQEM	GVSEWDPILEMLQEM	GVSEWDPILENLQEM	GVSEWDPILEPLQEM	GVSEWDPILEQLQEM	GVSEWDPILERLQEM	GVSEWDPILESLQEM	GVSEWDPILETLQEM	GVSEWDPILEVLQEM	GVSEWDPILEWLQEM	GVSEWDPILEYLQEM	GVSEWDPILEZLQEM	GVSEWDPILEOLQEM	GVSEWDPILEULQEM		EPLDFDWEIVLEEQM	KELDFDWEIVLEEQM	KPEDFDWEIVLEEQM	KPLEFDWEIVLEEQM	KPLDEDWEIVLEEQM	KPLDFEWEIVLEEQM	KPLDFDEEIVLEEQM	KPLDFDWEIVLEEQM	KPLDFDWEEVLEEQM	KPLDFDWEIELEEQM	KPLDFDWEIVEEEQM	KPLDFDWEIVLEEQM	KPLDFDWEIVLEEQM	KPLDFDWEIVLEEEM	KPLDFDWEIVLEEQE	EPLDFDWEIVLEEQM	EELDFDWEIVLEEQM	EPEDFDWEIVLEEQM	EPLEFDWEIVLEEQM	EPLDEDWEIVLEEQM	EPLDFEWEIVLEEQM	EPLDFDEEIVLEEQM	EPLDFDWEIVLEEQM	EPLDFDWEEVLEEQM
22	G	GVSEWDPILAELQEM	GVSEWDPILCELQEM	GVSEWDPILDELQEM	GVSEWDPILEELQEM	GVSEWDPILFELQEM	GVSEWDPILGELQEM	GVSEWDPILHELQEM	GVSEWDPILIELQEM	GVSEWDPILKELQEM	GVSEWDPILLELQEM	GVSEWDPILMELQEM	GVSEWDPILNELQEM	GVSEWDPILPELQEM	GVSEWDPILQELQEM	GVSEWDPILRELQEM	GVSEWDPILSELQEM	GVSEWDPILTELQEM	GVSEWDPILVELQEM	GVSEWDPILWELQEM	GVSEWDPILYELQEM	GVSEWDPILZELQEM	GVSEWDPILOELQEM	GVSEWDPILUELQEM		EPLDFDWEIVLEEQM	KELDFDWEIVLEEQM	KPEDFDWEIVLEEQM	KPLEFDWEIVLEEQM	KPLDEDWEIVLEEQM	KPLDFEWEIVLEEQM	KPLDFDEEIVLEEQM	KPLDFDWEIVLEEQM	KPLDFDWEEVLEEQM	KPLDFDWEIELEEQM	KPLDFDWEIVEEEQM	KPLDFDWEIVLEEQM	KPLDFDWEIVLEEQM	KPLDFDWEIVLEEEM	KPLDFDWEIVLEEQE	EPLDFDWEIVLEEQM	EELDFDWEIVLEEQM	EPEDFDWEIVLEEQM	EPLEFDWEIVLEEQM	EPLDEDWEIVLEEQM	EPLDFEWEIVLEEQM	EPLDFDEEIVLEEQM	EPLDFDWEIVLEEQM	EPLDFDWEEVLEEQM
23	YPYDVPDYAG	GVSEWDPIAEELQEM	GVSEWDPICEELQEM	GVSEWDPIDEELQEM	GVSEWDPIEEELQEM	GVSEWDPIFEELQEM	GVSEWDPIGEELQEM	GVSEWDPIHEELQEM	GVSEWDPIIEELQEM	GVSEWDPIKEELQEM	GVSEWDPILEELQEM	GVSEWDPIMEELQEM	GVSEWDPINEELQEM	GVSEWDPIPEELQEM	GVSEWDPIQEELQEM	GVSEWDPIREELQEM	GVSEWDPISEELQEM	GVSEWDPITEELQEM	GVSEWDPIVEELQEM	GVSEWDPIWEELQEM	GVSEWDPIYEELQEM	GVSEWDPIZEELQEM	GVSEWDPIOEELQEM	GVSEWDPIUEELQEM	KPLDFDWEIVLEEQM	EPLDFDWEIVLEEQM	KELDFDWEIVLEEQM	KPEDFDWEIVLEEQM	KPLEFDWEIVLEEQM	KPLDEDWEIVLEEQM	KPLDFEWEIVLEEQM	KPLDFDEEIVLEEQM	KPLDFDWEIVLEEQM	KPLDFDWEEVLEEQM	KPLDFDWEIELEEQM	KPLDFDWEIVEEEQM	KPLDFDWEIVLEEQM	KPLDFDWEIVLEEQM	KPLDFDWEIVLEEEM	KPLDFDWEIVLEEQE	EPLDFDWEIVLEEQM	EELDFDWEIVLEEQM	EPEDFDWEIVLEEQM	EPLEFDWEIVLEEQM	EPLDEDWEIVLEEQM	EPLDFEWEIVLEEQM	EPLDFDEEIVLEEQM	EPLDFDWEIVLEEQM	EPLDFDWEEVLEEQM
24	G	GVSEWDPALEELQEM	GVSEWDPCLEELQEM	GVSEWDPDLEELQEM	GVSEWDPELEELQEM	GVSEWDPFLEELQEM	GVSEWDPGLEELQEM	GVSEWDPHLEELQEM	GVSEWDPILEELQEM	GVSEWDPKLEELQEM	GVSEWDPLLEELQEM	GVSEWDPMLEELQEM	GVSEWDPNLEELQEM	GVSEWDPPLEELQEM	GVSEWDPQLEELQEM	GVSEWDPRLEELQEM	GVSEWDPSLEELQEM	GVSEWDPTLEELQEM	GVSEWDPVLEELQEM	GVSEWDPWLEELQEM	GVSEWDPYLEELQEM	GVSEWDPZLEELQEM	GVSEWDPOLEELQEM	GVSEWDPULEELQEM	G	EELDFDWEIVLEEQM	EELDFDWEIVLEEQM	EEEDFDWEIVLEEQM	EELEFDWEIVLEEQM	EELDEDWEIVLEEQM	EELDFEWEIVLEEQM	EELDFDEEIVLEEQM	EELDFDWEIVLEEQM	EELDFDWEEVLEEQM	EELDFDWEIELEEQM	EELDFDWEIVEEEQM	EELDFDWEIVLEEQM	EELDFDWEIVLEEQM	EELDFDWEIVLEEEM	EELDFDWEIVLEEQE	EELDFDEEIVLEEQM	EELDFDEEIVLEEQM	EEEDFDEEIVLEEQM	EELEFDEEIVLEEQM	EELDEDEEIVLEEQM	EELDFEEEIVLEEQM	EELDFDEEIVLEEQM	EELDFDEEIVLEEQM	EELDFDEEEVLEEQM
25	YPYDVPDYAG	GVSEWDAILEELQEM	GVSEWDCILEELQEM	GVSEWDDILEELQEM	GVSEWDEILEELQEM	GVSEWDFILEELQEM	GVSEWDGILEELQEM	GVSEWDHILEELQEM	GVSEWDIILEELQEM	GVSEWDKILEELQEM	GVSEWDLILEELQEM	GVSEWDMILEELQEM	GVSEWDNILEELQEM	GVSEWDPILEELQEM	GVSEWDQILEELQEM	GVSEWDRILEELQEM	GVSEWDSILEELQEM	GVSEWDTILEELQEM	GVSEWDVILEELQEM	GVSEWDWILEELQEM	GVSEWDYILEELQEM	GVSEWDZILEELQEM	GVSEWDOILEELQEM	GVSEWDUILEELQEM	KPLDFDWEIVLEEQM	EELDFDWEIVLEEQM	EELDFDWEIVLEEQM	EEEDFDWEIVLEEQM	EELEFDWEIVLEEQM	EELDEDWEIVLEEQM	EELDFEWEIVLEEQM	EELDFDEEIVLEEQM	EELDFDWEIVLEEQM	EELDFDWEEVLEEQM	EELDFDWEIELEEQM	EELDFDWEIVEEEQM	EELDFDWEIVLEEQM	EELDFDWEIVLEEQM	EELDFDWEIVLEEEM	EELDFDWEIVLEEQE	EELDFDEEIVLEEQM	EELDFDEEIVLEEQM	EEEDFDEEIVLEEQM	EELEFDEEIVLEEQM	EELDEDEEIVLEEQM	EELDFEEEIVLEEQM	EELDFDEEIVLEEQM	EELDFDEEIVLEEQM	EELDFDEEEVLEEQM
26	G	GVSEWAPILEELQEM	GVSEWCPILEELQEM	GVSEWDPILEELQEM	GVSEWEPILEELQEM	GVSEWFPILEELQEM	GVSEWGPILEELQEM	GVSEWHPILEELQEM	GVSEWIPILEELQEM	GVSEWKPILEELQEM	GVSEWLPILEELQEM	GVSEWMPILEELQEM	GVSEWNPILEELQEM	GVSEWPPILEELQEM	GVSEWQPILEELQEM	GVSEWRPILEELQEM	GVSEWSPILEELQEM	GVSEWTPILEELQEM	GVSEWVPILEELQEM	GVSEWWPILEELQEM	GVSEWYPILEELQEM	GVSEWZPILEELQEM	GVSEWOPILEELQEM	GVSEWUPILEELQEM	G	EELDFDWEIVLEEQM	EELDFDWEIVLEEQM	EEEDFDWEIVLEEQM	EELEFDWEIVLEEQM	EELDEDWEIVLEEQM	EELDFEWEIVLEEQM	EELDFDEEIVLEEQM	EELDFDWEIVLEEQM	EELDFDWEEVLEEQM	EELDFDWEIELEEQM	EELDFDWEIVEEEQM	EELDFDWEIVLEEQM	EELDFDWEIVLEEQM	EELDFDWEIVLEEEM	EELDFDWEIVLEEQE	EELDFDEEIVLEEQM	EELDFDEEIVLEEQM	EEEDFDEEIVLEEQM	EELEFDEEIVLEEQM	EELDEDEEIVLEEQM	EELDFEEEIVLEEQM	EELDFDEEIVLEEQM	EELDFDEEIVLEEQM	EELDFDEEEVLEEQM
27	YPYDVPDYAG	GVSEADPILEELQEM	GVSECDPILEELQEM	GVSEDDPILEELQEM	GVSEEDPILEELQEM	GVSEFDPILEELQEM	GVSEGDPILEELQEM	GVSEHDPILEELQEM	GVSEIDPILEELQEM	GVSEKDPILEELQEM	GVSELDPILEELQEM	GVSEMDPILEELQEM	GVSENDPILEELQEM	GVSEPDPILEELQEM	GVSEQDPILEELQEM	GVSERDPILEELQEM	GVSESDPILEELQEM	GVSETDPILEELQEM	GVSEVDPILEELQEM	GVSEWDPILEELQEM	GVSEYDPILEELQEM	GVSEZDPILEELQEM	GVSEODPILEELQEM	GVSEUDPILEELQEM	KPLDFDWEIVLEEQM	EELDFDEEIVLEEEM	EELDFDEEIVLEEEM	EEEDFDEEIVLEEEM	EELEFDEEIVLEEEM	EELDEDEEIVLEEEM	EELDFEEEIVLEEEM	EELDFDEEIVLEEEM	EELDFDEEIVLEEEM	EELDFDEEEVLEEEM	EELDFDEEIELEEEM	EELDFDEEIVEEEEM	EELDFDEEIVLEEEM	EELDFDEEIVLEEEM	EELDFDEEIVLEEEM	EELDFDEEIVLEEEE	EELDFDEEIVLEEEE	EELDFDEEIVLEEEE	EEEDFDEEIVLEEEE	EELEFDEEIVLEEEE	EELDEDEEIVLEEEE	EELDFEEEIVLEEEE	EELDFDEEIVLEEEE	EELDFDEEIVLEEEE	EELDFDEEEVLEEEE
28	G	GVSAWDPILEELQEM	GVSCWDPILEELQEM	GVSDWDPILEELQEM	GVSEWDPILEELQEM	GVSFWDPILEELQEM	GVSGWDPILEELQEM	GVSHWDPILEELQEM	GVSIWDPILEELQEM	GVSKWDPILEELQEM	GVSLWDPILEELQEM	GVSMWDPILEELQEM	GVSNWDPILEELQEM	GVSPWDPILEELQEM	GVSQWDPILEELQEM	GVSRWDPILEELQEM	GVSSWDPILEELQEM	GVSTWDPILEELQEM	GVSVWDPILEELQEM	GVSWWDPILEELQEM	GVSYWDPILEELQEM	GVSZWDPILEELQEM	GVSOWDPILEELQEM	GVSUWDPILEELQEM	G	EELDFDEEIVLEEEM	EELDFDEEIVLEEEM	EEEDFDEEIVLEEEM	EELEFDEEIVLEEEM	EELDEDEEIVLEEEM	EELDFEEEIVLEEEM	EELDFDEEIVLEEEM	EELDFDEEIVLEEEM	EELDFDEEEVLEEEM	EELDFDEEIELEEEM	EELDFDEEIVEEEEM	EELDFDEEIVLEEEM	EELDFDEEIVLEEEM	EELDFDEEIVLEEEM	EELDFDEEIVLEEEE	EELDFDEEIVLEEEE	EELDFDEEIVLEEEE	EEEDFDEEIVLEEEE	EELEFDEEIVLEEEE	EELDEDEEIVLEEEE	EELDFEEEIVLEEEE	EELDFDEEIVLEEEE	EELDFDEEIVLEEEE	EELDFDEEEVLEEEE
29	YPYDVPDYAG	GVAEWDPILEELQEM	GVCEWDPILEELQEM	GVDEWDPILEELQEM	GVEEWDPILEELQEM	GVFEWDPILEELQEM	GVGEWDPILEELQEM	GVHEWDPILEELQEM	GVIEWDPILEELQEM	GVKEWDPILEELQEM	GVLEWDPILEELQEM	GVMEWDPILEELQEM	GVNEWDPILEELQEM	GVPEWDPILEELQEM	GVQEWDPILEELQEM	GVREWDPILEELQEM	GVSEWDPILEELQEM	GVTEWDPILEELQEM	GVVEWDPILEELQEM	GVWEWDPILEELQEM	GVYEWDPILEELQEM	GVZEWDPILEELQEM	GVOEWDPILEELQEM	GVUEWDPILEELQEM	KPLDFDWEIVLEEQM	EELDFDEEIVLEEEM	EELDFDEEIVLEEEM	EEEDFDEEIVLEEEM	EELEFDEEIVLEEEM	EELDEDEEIVLEEEM	EELDFEEEIVLEEEM	EELDFDEEIVLEEEM	EELDFDEEIVLEEEM	EELDFDEEEVLEEEM	EELDFDEEIELEEEM	EELDFDEEIVEEEEM	EELDFDEEIVLEEEM	EELDFDEEIVLEEEM	EELDFDEEIVLEEEM	EELDFDEEIVLEEEE	EELDFDEEIVLEEEE	EELDFDEEIVLEEEE	EEEDFDEEIVLEEEE	EELEFDEEIVLEEEE	EELDEDEEIVLEEEE	EELDFEEEIVLEEEE	EELDFDEEIVLEEEE	EELDFDEEIVLEEEE	EELDFDEEEVLEEEE
30	G	GASEWDPILEELQEM	GCSEWDPILEELQEM	GDSEWDPILEELQEM	GESEWDPILEELQEM	GFSEWDPILEELQEM	GGSEWDPILEELQEM	GHSEWDPILEELQEM	GISEWDPILEELQEM	GKSEWDPILEELQEM	GLSEWDPILEELQEM	GMSEWDPILEELQEM	GNSEWDPILEELQEM	GPSEWDPILEELQEM	GQSEWDPILEELQEM	GRSEWDPILEELQEM	GSSEWDPILEELQEM	GTSEWDPILEELQEM	GVSEWDPILEELQEM	GWSEWDPILEELQEM	GYSEWDPILEELQEM	GZSEWDPILEELQEM	GOSEWDPILEELQEM	GUSEWDPILEELQEM	G
31	YPYDVPDYAG	AVSEWDPILEELQEM	CVSEWDPILEELQEM	DVSEWDPILEELQEM	EVSEWDPILEELQEM	FVSEWDPILEELQEM	GVSEWDPILEELQEM	HVSEWDPILEELQEM	IVSEWDPILEELQEM	KVSEWDPILEELQEM	LVSEWDPILEELQEM	MVSEWDPILEELQEM	NVSEWDPILEELQEM	PVSEWDPILEELQEM	QVSEWDPILEELQEM	RVSEWDPILEELQEM	SVSEWDPILEELQEM	TVSEWDPILEELQEM	VVSEWDPILEELQEM	WVSEWDPILEELQEM	YVSEWDPILEELQEM	ZVSEWDPILEELQEM	OVSEWDPILEELQEM	UVSEWDPILEELQEM	KPLDFDWEIVLEEQM
	YPYDVPDYAG	G	YPYDVPDYAG	G	YPYDVPDYAG	G	YPYDVPDYAG	G	YPYDVPDYAG	G	YPYDVPDYAG	G	YPYDVPDYAG	G	YPYDVPDYAG	G	YPYDVPDYAG	G	YPYDVPDYAG	G	YPYDVPDYAG	G	YPYDVPDYAG	G	YPYDVPDYAG	G	YPYDVPDYAG	G	YPYDVPDYAG	G	YPYDVPDYAG	G	YPYDVPDYAG	G	YPYDVPDYAG	G	YPYDVPDYAG	G	YPYDVPDYAG	G	YPYDVPDYAG	G	YPYDVPDYAG	G	YPYDVPDYAG	G	YPYDVPDYAG	G	YPYDVPDYAG
[truncated: 7 more columns]

## Sheet: Intensity Map
Intensity Map GVSEWDPILEELQEM Substitution Scan - Protein GST-ATG8A (PEP201752521)
Microarray Content:	Full substitution scan of peptide GVSEWDPILEELQEM with exchange of all amino acid positions by 23 amino acids including citrulline (Z), methyl-alanine (O) and D-alanine (U)
	Additional N- and C-terminal deletion series of wild type peptide GVSEWDPILEELQEM
	Additional acidic variants of control peptide KPLDFDWEIVLEEQM
Sample:	Protein GST-ATG8A
Peptide Length:	1 aa - 15 aa
Number of Peptides:	416
Number of Spots:	1,412 (peptides printed at least in triplicate)
HA Control:	YPYDVPDYAG	88 Spots
Custom Control:	KPLDFDWEIVLEEQ	32 Spots
GST-ATG8A, 10 µg/ml		1	2	3	4	5	6	7	8	9	10	11	12	13	14	15	16	17	18	19	20	21	22	23	24	25	26	27	28	29	30	31	32	33	34	35	36	37	38	39	40	41	42	43	44	45	46	47	48
	YPYDVPDYAG	G	YPYDVPDYAG	G	YPYDVPDYAG	G	YPYDVPDYAG	G	YPYDVPDYAG	G	YPYDVPDYAG	G	YPYDVPDYAG	G	YPYDVPDYAG	G	YPYDVPDYAG	G	YPYDVPDYAG	G	YPYDVPDYAG	G	YPYDVPDYAG	G	YPYDVPDYAG	G	YPYDVPDYAG	G	YPYDVPDYAG	G	YPYDVPDYAG	G	YPYDVPDYAG	G	YPYDVPDYAG	G	YPYDVPDYAG	G	YPYDVPDYAG	G	YPYDVPDYAG	G	YPYDVPDYAG	G	YPYDVPDYAG	G	YPYDVPDYAG	G	YPYDVPDYAG
1	YPYDVPDYAG	1021.67	2795.33	2930	3245	5557.67	272.333	1471.17	2835	233.667	1890.67	1347.5	992.333	856	707.5	1052	1163.83	1106	1855.33	2432.67	5645.83	526	603.833	1038.5	36407	1021.67	2795.33	2930	3245	5557.67	272.333	1471.17	2835	233.667	1890.67	1347.5	992.333	856	707.5	1052	1163.83	1106	1855.33	2432.67	5645.83	526	603.833	1038.5
2	G	132.167	646.333	1247.33	1347.5	895.5	61	257.333	598.667	13.1667	218.667	169	229.667	275.667	95.6667	3.33333	129.5	291.667	398.167	410.5	1315.33	8.33333	171.333	5	60.6857	132.167	646.333	1247.33	1347.5	895.5	61	257.333	598.667	13.1667	218.667	169	229.667	275.667	95.6667	3.33333	129.5	291.667	398.167	410.5	1315.33	8.33333	171.333	5
3	YPYDVPDYAG	778.333	3567.83	3956.67	4504.67	7625.33	1203.67	1734.33	3486	477.167	2345.33	1129.17	1501.33	1447.67	1347.5	1027.83	1516	2147.5	2321	3951.5	6888.33	981.667	1388.67	972.833	36407	778.333	3567.83	3956.67	4504.67	7625.33	1203.67	1734.33	3486	477.167	2345.33	1129.17	1501.33	1447.67	1347.5	1027.83	1516	2147.5	2321	3951.5	6888.33	981.667	1388.67	972.833
4	G	553.167	2317.17	2129.5	2443.83	5127.83	409.333	665	1038.17	259.333	1347.5	779	819.833	1212.17	649.333	624.833	964.5	1056.5	899	2038.33	3670.17	667.333	770.333	152	60.6857	553.167	2317.17	2129.5	2443.83	5127.83	409.333	665	1038.17	259.333	1347.5	779	819.833	1212.17	649.333	624.833	964.5	1056.5	899	2038.33	3670.17	667.333	770.333	152
5	YPYDVPDYAG	115	801.167	1633.67	1347.5	1233	185	144	640	74	459.667	181	189	375.333	156.667	132	318.667	276.5	337.167	498.667	1189.33	193.833	372	262.667	36407	115	801.167	1633.67	1347.5	1233	185	144	640	74	459.667	181	189	375.333	156.667	132	318.667	276.5	337.167	498.667	1189.33	193.833	372	262.667
6	G	183	1211.33	1533.67	1347.5	1788.33	183	294.5	3480.83	71	1135.33	171.333	251.5	401.833	127.667	75.6667	208	350.5	3509.17	827.833	1167.17	153.333	386.167	91.6667	60.6857	183	1211.33	1533.67	1347.5	1788.33	183	294.5	3480.83	71	1135.33	171.333	251.5	401.833	127.667	75.6667	208	350.5	3509.17	827.833	1167.17	153.333	386.167	91.6667
7	YPYDVPDYAG	523.333	2373.83	2295	2560.5	3759.17	324.833	440.667	1520.33	249.667	1347.5	406	685	473.667	539	366.333	588.333	595.667	1051	4002.5	2421.5	236.167	134.333	637.833	36407	523.333	2373.83	2295	2560.5	3759.17	324.833	440.667	1520.33	249.667	1347.5	406	685	473.667	539	366.333	588.333	595.667	1051	4002.5	2421.5	236.167	134.333	637.833
8	G	418.333	2343.83	2872	1927.67	3623	303.667	401.333	1347.5	262	1604.33	378	469	272.833	469	244.333	394.167	441.667	850.5	2864.83	2338.67	182	47.6667	215.333	60.6857	418.333	2343.83	2872	1927.67	3623	303.667	401.333	1347.5	262	1604.33	378	469	272.833	469	244.333	394.167	441.667	850.5	2864.83	2338.67	182	47.6667	215.333
9	YPYDVPDYAG	1760.33	6426.17	8508.67	7848.83	24305.7	622.333	1738.67	10150.5	888.5	11008.3	1768.67	1436.33	1347.5	1539.67	810.667	1530.33	1486.17	6974.17	9520	17372.3	1302.33	1942.67	556	36407	1760.33	6426.17	8508.67	7848.83	24305.7	622.333	1738.67	10150.5	888.5	11008.3	1768.67	1436.33	1347.5	1539.67	810.667	1530.33	1486.17	6974.17	9520	17372.3	1302.33	1942.67	556
10	G	0	653.333	1347.5	1534	253	37.6667	9	296.833	0	107	62.3333	8.66667	25	47	0	26.1667	90	370.667	39	343	0	0	0		0	653.333	1347.5	1534	253	37.6667	9	296.833	0	107	62.3333	8.66667	25	47	0	26.1667	90	370.667	39	343	0	0	0
11	YPYDVPDYAG	0	469.667	96.3333	161	357.5	0	0	0	0	27	2	0	0	0	0	7.33333	6.66667	7	1347.5	411	0	0	6.33333		0	469.667	96.3333	161	357.5	0	0	0	0	27	2	0	0	0	0	7.33333	6.66667	7	1347.5	411	0	0	6.33333
12	G	243.333	904.667	1852.5	1347.5	294.333	415	230	324	159.667	195	197	245	250.833	262.5	181.333	291	223.667	282.333	356.5	286.667	170.667	138	187.667		243.333	904.667	1852.5	1347.5	294.333	415	230	324	159.667	195	197	245	250.833	262.5	181.333	291	223.667	282.333	356.5	286.667	170.667	138	187.667
13	YPYDVPDYAG	1398	3236	4296.67	4148.5	2110.67	1429.33	1113	1894	791.333	1508.33	1023.83	1352.17	977.667	1534.83	1326.5	1347.5	1333.67	1544.33	3385	1998.67	1274.17	1088.33	1322		1398	3236	4296.67	4148.5	2110.67	1429.33	1113	1894	791.333	1508.33	1023.83	1352.17	977.667	1534.83	1326.5	1347.5	1333.67	1544.33	3385	1998.67	1274.17	1088.33	1322
14	G	1376.5	3269.83	3282	2750.33	2249	1530.5	1177.83	1881.5	884.333	1849.5	1154.33	1544.17	1326.67	1541.17	1691.33	1528.83	1404.5	1347.5	3032	2284.67	1309.33	1060.83	1113.17		1376.5	3269.83	3282	2750.33	2249	1530.5	1177.83	1881.5	884.333	1849.5	1154.33	1544.17	1326.67	1541.17	1691.33	1528.83	1404.5	1347.5	3032	2284.67	1309.33	1060.83	1113.17
15	YPYDVPDYAG	1666.83	5779.17	3451.67	2821.33	2315	1347.5	1591.83	2158.67	1405.67	2129.17	1689.5	1826.83	1472.33	2287.83	1778.83	2245.5	2001.83	2249.17	4139.83	3144.5	2066.17	1311.83	2028.67		1666.83	5779.17	3451.67	2821.33	2315	1347.5	1591.83	2158.67	1405.67	2129.17	1689.5	1826.83	1472.33	2287.83	1778.83	2245.5	2001.83	2249.17	4139.83	3144.5	2066.17	1311.83	2028.67
16	G	36407	60.6857	36407	60.6857	36407	60.6857	36407	60.6857	36407																																					36407	60.6857	36407
17	YPYDVPDYAG	1021.67	2795.33	2930	3245	5557.67	272.333	1471.17	2835	233.667	1890.67	1347.5	992.333	856	707.5	1052	1163.83	1106	1855.33	2432.67	5645.83	526	603.833	1038.5		1347.5	3984	3675	5096.83	5726.67	2357.33	662.167	623.5	878.667	1245.67	3.33333	0	0	0	60.6857	1347.5	2089.5	1483.17	2214	918.333	306.333	180.667	200.667	188.333
18	G	132.167	646.333	1247.33	1347.5	895.5	61	257.333	598.667	13.1667	218.667	169	229.667	275.667	95.6667	3.33333	129.5	291.667	398.167	410.5	1315.33	8.33333	171.333	5		1347.5	3984	3675	5096.83	5726.67	2357.33	662.167	623.5	878.667	1245.67	3.33333	0	0	0	60.6857	1347.5	2089.5	1483.17	2214	918.333	306.333	180.667	200.667	188.333
19	YPYDVPDYAG	778.333	3567.83	3956.67	4504.67	7625.33	1203.67	1734.33	3486	477.167	2345.33	1129.17	1501.33	1447.67	1347.5	1027.83	1516	2147.5	2321	3951.5	6888.33	981.667	1388.67	972.833		1347.5	3984	3675	5096.83	5726.67	2357.33	662.167	623.5	878.667	1245.67	3.33333	0	0	0	60.6857	1347.5	2089.5	1483.17	2214	918.333	306.333	180.667	200.667	188.333
20	G	553.167	2317.17	2129.5	2443.83	5127.83	409.333	665	1038.17	259.333	1347.5	779	819.833	1212.17	649.333	624.833	964.5	1056.5	899	2038.33	3670.17	667.333	770.333	152
21	YPYDVPDYAG	115	801.167	1633.67	1347.5	1233	185	144	640	74	459.667	181	189	375.333	156.667	132	318.667	276.5	337.167	498.667	1189.33	193.833	372	262.667		35864.4	24631.2	25805.5	22043.2	31093.5	25003.2	961	36407	13684.3	11928.7	24065.8	36407	36407	31794.2	29670.5	35864.4	35684.9	38449.3	32808.7	51356.2	48851.3	4493.17	35864.4	28333.5
22	G	183	1211.33	1533.67	1347.5	1788.33	183	294.5	3480.83	71	1135.33	171.333	251.5	401.833	127.667	75.6667	208	350.5	3509.17	827.833	1167.17	153.333	386.167	91.6667		35864.4	24631.2	25805.5	22043.2	31093.5	25003.2	961	36407	13684.3	11928.7	24065.8	36407	36407	31794.2	29670.5	35864.4	35684.9	38449.3	32808.7	51356.2	48851.3	4493.17	35864.4	28333.5
23	YPYDVPDYAG	523.333	2373.83	2295	2560.5	3759.17	324.833	440.667	1520.33	249.667	1347.5	406	685	473.667	539	366.333	588.333	595.667	1051	4002.5	2421.5	236.167	134.333	637.833	36407	35864.4	24631.2	25805.5	22043.2	31093.5	25003.2	961	36407	13684.3	11928.7	24065.8	36407	36407	31794.2	29670.5	35864.4	35684.9	38449.3	32808.7	51356.2	48851.3	4493.17	35864.4	28333.5
24	G	418.333	2343.83	2872	1927.67	3623	303.667	401.333	1347.5	262	1604.33	378	469	272.833	469	244.333	394.167	441.667	850.5	2864.83	2338.67	182	47.6667	215.333	60.6857	35684.9	35684.9	43043	35597.8	45639.2	37965.8	5075.98	35684.9	27498.8	24407.7	41913	35684.9	35684.9	44331.2	50465.8	5075.98	5075.98	5377	3739.67	283	4799.67	5075.98	5075.98	4025.17
25	YPYDVPDYAG	1760.33	6426.17	8508.67	7848.83	24305.7	622.333	1738.67	10150.5	888.5	11008.3	1768.67	1436.33	1347.5	1539.67	810.667	1530.33	1486.17	6974.17	9520	17372.3	1302.33	1942.67	556	36407	35684.9	35684.9	43043	35597.8	45639.2	37965.8	5075.98	35684.9	27498.8	24407.7	41913	35684.9	35684.9	44331.2	50465.8	5075.98	5075.98	5377	3739.67	283	4799.67	5075.98	5075.98	4025.17
26	G	0	653.333	1347.5	1534	253	37.6667	9	296.833	0	107	62.3333	8.66667	25	47	0	26.1667	90	370.667	39	343	0	0	0	60.6857	35684.9	35684.9	43043	35597.8	45639.2	37965.8	5075.98	35684.9	27498.8	24407.7	41913	35684.9	35684.9	44331.2	50465.8	5075.98	5075.98	5377	3739.67	283	4799.67	5075.98	5075.98	4025.17
27	YPYDVPDYAG	0	469.667	96.3333	161	357.5	0	0	0	0	27	2	0	0	0	0	7.33333	6.66667	7	1347.5	411	0	0	6.33333	36407	10821.3	10821.3	11358.7	9052.5	1555.17	11464.3	10821.3	10821.3	7928	10376.5	7149	10821.3	10821.3	10821.3	16601.1	16601.1	16601.1	16187.3	13217	4840	13819	16601.1	16601.1	10446.8
28	G	243.333	904.667	1852.5	1347.5	294.333	415	230	324	159.667	195	197	245	250.833	262.5	181.333	291	223.667	282.333	356.5	286.667	170.667	138	187.667	60.6857	10821.3	10821.3	11358.7	9052.5	1555.17	11464.3	10821.3	10821.3	7928	10376.5	7149	10821.3	10821.3	10821.3	16601.1	16601.1	16601.1	16187.3	13217	4840	13819	16601.1	16601.1	10446.8
29	YPYDVPDYAG	1398	3236	4296.67	4148.5	2110.67	1429.33	1113	1894	791.333	1508.33	1023.83	1352.17	977.667	1534.83	1326.5	1347.5	1333.67	1544.33	3385	1998.67	1274.17	1088.33	1322	36407	10821.3	10821.3	11358.7	9052.5	1555.17	11464.3	10821.3	10821.3	7928	10376.5	7149	10821.3	10821.3	10821.3	16601.1	16601.1	16601.1	16187.3	13217	4840	13819	16601.1	16601.1	10446.8
30	G	1376.5	3269.83	3282	2750.33	2249	1530.5	1177.83	1881.5	884.333	1849.5	1154.33	1544.17	1326.67	1541.17	1691.33	1528.83	1404.5	1347.5	3032	2284.67	1309.33	1060.83	1113.17	60.6857
31	YPYDVPDYAG	1666.83	5779.17	3451.67	2821.33	2315	1347.5	1591.83	2158.67	1405.67	2129.17	1689.5	1826.83	1472.33	2287.83	1778.83	2245.5	2001.83	2249.17	4139.83	3144.5	2066.17	1311.83	2028.67	36407
	YPYDVPDYAG	G	YPYDVPDYAG	G	YPYDVPDYAG	G	YPYDVPDYAG	G	YPYDVPDYAG	G	YPYDVPDYAG	G	YPYDVPDYAG	G	YPYDVPDYAG	G	YPYDVPDYAG	G	YPYDVPDYAG	G	YPYDVPDYAG	G	YPYDVPDYAG	G	YPYDVPDYAG	G	YPYDVPDYAG	G	YPYDVPDYAG	G	YPYDVPDYAG	G	YPYDVPDYAG	G	YPYDVPDYAG	G	YPYDVPDYAG	G	YPYDVPDYAG	G	YPYDVPDYAG	G	YPYDVPDYAG	G	YPYDVPDYAG	G	YPYDVPDYAG	G	YPYDVPDYAG
[truncated: 7 more columns]

## Sheet: Heat Map
Heat Map and Substitution Matrix GVSEWDPILEELQEM Substitution Scan - Protein GST-ATG8A (PEP201752521)
	A	C	D	E	F	G	H	I	K	L	M	N	P	Q	R	S	T	V	W	Y	Z	O	U
M	1021.67	2795.33	2930	3245	5557.67	272.333	1471.17	2835	233.667	1890.67	1347.5	992.333	856	707.5	1052	1163.83	1106	1855.33	2432.67	5645.83	526	603.833	1038.5		M	Y	F	E	D	I	C	W	L	V	H	M	S	T	R	U	A	N	P	Q	O	Z	G	K
E	132.167	646.333	1247.33	1347.5	895.5	61	257.333	598.667	13.1667	218.667	169	229.667	275.667	95.6667	3.33333	129.5	291.667	398.167	410.5	1315.33	8.33333	171.333	5		E	E	Y	D	F	C	I	W	V	T	P	H	N	L	O	M	A	S	Q	G	K	Z	U	R
Q	778.333	3567.83	3956.67	4504.67	7625.33	1203.67	1734.33	3486	477.167	2345.33	1129.17	1501.33	1447.67	1347.5	1027.83	1516	2147.5	2321	3951.5	6888.33	981.667	1388.67	972.833		Q	F	Y	E	D	W	C	I	L	V	T	H	S	N	P	O	Q	G	M	R	Z	U	A	K
L	553.167	2317.17	2129.5	2443.83	5127.83	409.333	665	1038.17	259.333	1347.5	779	819.833	1212.17	649.333	624.833	964.5	1056.5	899	2038.33	3670.17	667.333	770.333	152		L	F	Y	E	C	D	W	L	P	T	I	S	V	N	M	O	Z	H	Q	R	A	G	K	U
E	115	801.167	1633.67	1347.5	1233	185	144	640	74	459.667	181	189	375.333	156.667	132	318.667	276.5	337.167	498.667	1189.33	193.833	372	262.667		E	D	E	F	Y	C	I	W	L	P	O	V	S	T	U	Z	N	G	M	Q	H	R	A	K
E	183	1211.33	1533.67	1347.5	1788.33	183	294.5	3480.83	71	1135.33	171.333	251.5	401.833	127.667	75.6667	208	350.5	3509.17	827.833	1167.17	153.333	386.167	91.6667		E	V	I	F	D	E	C	Y	L	W	P	O	T	H	N	S	A	G	M	Z	Q	U	R	K
L	523.333	2373.83	2295	2560.5	3759.17	324.833	440.667	1520.33	249.667	1347.5	406	685	473.667	539	366.333	588.333	595.667	1051	4002.5	2421.5	236.167	134.333	637.833		L	W	F	E	Y	C	D	I	L	V	N	U	T	S	Q	A	P	H	M	R	G	K	Z	O
I	418.333	2343.83	2872	1927.67	3623	303.667	401.333	1347.5	262	1604.33	378	469	272.833	469	244.333	394.167	441.667	850.5	2864.83	2338.67	182	47.6667	215.333		I	F	D	W	C	Y	E	L	I	V	Q	N	T	A	H	S	M	G	P	K	R	U	Z	O
P	1760.33	6426.17	8508.67	7848.83	24305.7	622.333	1738.67	10150.5	888.5	11008.3	1768.67	1436.33	1347.5	1539.67	810.667	1530.33	1486.17	6974.17	9520	17372.3	1302.33	1942.67	556		P	F	Y	L	I	W	D	E	V	C	O	M	A	H	Q	S	T	N	P	Z	K	R	G	U
D	0	653.333	1347.5	1534	253	37.6667	9	296.833	0	107	62.3333	8.66667	25	47	0	26.1667	90	370.667	39	343	0	0	0		D	E	D	C	V	Y	I	F	L	T	M	Q	W	G	S	P	H	N	U	O	Z	R	A	K
W	0	469.667	96.3333	161	357.5	0	0	0	0	27	2	0	0	0	0	7.33333	6.66667	7	1347.5	411	0	0	6.33333		W	W	C	Y	F	E	D	L	S	V	T	U	M	O	Z	R	Q	P	N	A	G	H	I	K
E	243.333	904.667	1852.5	1347.5	294.333	415	230	324	159.667	195	197	245	250.833	262.5	181.333	291	223.667	282.333	356.5	286.667	170.667	138	187.667		E	D	E	C	G	W	I	F	S	Y	V	Q	P	N	A	H	T	M	L	U	R	Z	K	O
S	1398	3236	4296.67	4148.5	2110.67	1429.33	1113	1894	791.333	1508.33	1023.83	1352.17	977.667	1534.83	1326.5	1347.5	1333.67	1544.33	3385	1998.67	1274.17	1088.33	1322		S	D	E	W	C	F	Y	I	V	Q	L	G	A	N	S	T	R	U	Z	H	O	M	P	K
V	1376.5	3269.83	3282	2750.33	2249	1530.5	1177.83	1881.5	884.333	1849.5	1154.33	1544.17	1326.67	1541.17	1691.33	1528.83	1404.5	1347.5	3032	2284.67	1309.33	1060.83	1113.17		V	D	C	W	E	Y	F	I	L	R	N	Q	G	S	T	A	V	P	Z	H	M	U	O	K
G	1666.83	5779.17	3451.67	2821.33	2315	1347.5	1591.83	2158.67	1405.67	2129.17	1689.5	1826.83	1472.33	2287.83	1778.83	2245.5	2001.83	2249.17	4139.83	3144.5	2066.17	1311.83	2028.67		G	C	W	D	Y	E	F	Q	V	S	I	L	Z	U	T	N	R	M	A	H	P	K	G	O
[truncated: 24 more columns]

## Sheet: Amino Acid Plot
Amino Acid Plot GVSEWDPILEELQEM Substitution Scan - Protein GST-ATG8A (PEP201752521)																	Amino Acid Plot GVSEWDPILEELQEM Substitution Scan - Protein GST-ATG8A (PEP201752521)
	G	V	S	E	W	D	P	I	L	E	E	L	Q	E	M			G	V	S	E	W	D	P	I	L	E	E	L	Q	E	M

## Sheet: Intensity Plot
Intensity Plot GVSEWDPILEELQEM Deletion Series - Protein GST-ATG8A (PEP201752521)

## Sheet: Mapping Summary
Spot Family	Row	Column	Peptide	GST-ATG8A, 10 µg/ml	Deviation	Deviation [%]
HA Control Peptide (PEP201752521)	1	9	YPYDVPDYAG	464.676	233.15	0.501747
Wild Type Peptide GVSEWDPILEELQEM, Peptide Substitution Scan (PEP201752521)	2	10	GVSEWDPILEELQEA	1021.67	432.889	0.423709
Wild Type Peptide GVSEWDPILEELQEM, Peptide Substitution Scan (PEP201752521)	2	11	GVSEWDPILEELQEC	2795.33	1053.11	0.376739
Wild Type Peptide GVSEWDPILEELQEM, Peptide Substitution Scan (PEP201752521)	2	12	GVSEWDPILEELQED	2930	668.667	0.228214
Wild Type Peptide GVSEWDPILEELQEM, Peptide Substitution Scan (PEP201752521)	2	13	GVSEWDPILEELQEE	3245	994.667	0.306523
Wild Type Peptide GVSEWDPILEELQEM, Peptide Substitution Scan (PEP201752521)	2	14	GVSEWDPILEELQEF	5557.67	1761.56	0.31696
Wild Type Peptide GVSEWDPILEELQEM, Peptide Substitution Scan (PEP201752521)	2	15	GVSEWDPILEELQEG	272.333	249.778	0.917177
Wild Type Peptide GVSEWDPILEELQEM, Peptide Substitution Scan (PEP201752521)	2	16	GVSEWDPILEELQEH	1471.17	599.889	0.407764
Wild Type Peptide GVSEWDPILEELQEM, Peptide Substitution Scan (PEP201752521)	2	17	GVSEWDPILEELQEI	2835	492	0.173545
Wild Type Peptide GVSEWDPILEELQEM, Peptide Substitution Scan (PEP201752521)	2	18	GVSEWDPILEELQEK	233.667	196.889	0.842606
Wild Type Peptide GVSEWDPILEELQEM, Peptide Substitution Scan (PEP201752521)	2	19	GVSEWDPILEELQEL	1890.67	673.778	0.35637
Wild Type Peptide GVSEWDPILEELQEM, Peptide Substitution Scan (PEP201752521)	2	21	GVSEWDPILEELQEN	992.333	444.222	0.447654
Wild Type Peptide GVSEWDPILEELQEM, Peptide Substitution Scan (PEP201752521)	2	22	GVSEWDPILEELQEP	856	412	0.481308
Wild Type Peptide GVSEWDPILEELQEM, Peptide Substitution Scan (PEP201752521)	2	23	GVSEWDPILEELQEQ	707.5	355.667	0.502709
Wild Type Peptide GVSEWDPILEELQEM, Peptide Substitution Scan (PEP201752521)	2	24	GVSEWDPILEELQER	1052	277.333	0.263625
Wild Type Peptide GVSEWDPILEELQEM, Peptide Substitution Scan (PEP201752521)	2	25	GVSEWDPILEELQES	1163.83	238.556	0.204974
Wild Type Peptide GVSEWDPILEELQEM, Peptide Substitution Scan (PEP201752521)	2	26	GVSEWDPILEELQET	1106	170	0.153707
Wild Type Peptide GVSEWDPILEELQEM, Peptide Substitution Scan (PEP201752521)	2	27	GVSEWDPILEELQEV	1855.33	283.111	0.152593
Wild Type Peptide GVSEWDPILEELQEM, Peptide Substitution Scan (PEP201752521)	2	28	GVSEWDPILEELQEW	2432.67	156.222	0.0642185
Wild Type Peptide GVSEWDPILEELQEM, Peptide Substitution Scan (PEP201752521)	2	29	GVSEWDPILEELQEY	5645.83	1259.11	0.223016
Wild Type Peptide GVSEWDPILEELQEM, Peptide Substitution Scan (PEP201752521)	2	30	GVSEWDPILEELQEZ	526	264	0.501901
Wild Type Peptide GVSEWDPILEELQEM, Peptide Substitution Scan (PEP201752521)	2	31	GVSEWDPILEELQEO	603.833	175.444	0.290551
Wild Type Peptide GVSEWDPILEELQEM, Peptide Substitution Scan (PEP201752521)	2	32	GVSEWDPILEELQEU	1038.5	220.667	0.212486
Wild Type Peptide GVSEWDPILEELQEM, Peptide Substitution Scan (PEP201752521)	3	10	GVSEWDPILEELQAM	132.167	116.889	0.884405
Wild Type Peptide GVSEWDPILEELQEM, Peptide Substitution Scan (PEP201752521)	3	11	GVSEWDPILEELQCM	646.333	155.111	0.239986
Wild Type Peptide GVSEWDPILEELQEM, Peptide Substitution Scan (PEP201752521)	3	12	GVSEWDPILEELQDM	1247.33	342.889	0.274898
Wild Type Peptide GVSEWDPILEELQEM, Peptide Substitution Scan (PEP201752521)	3	14	GVSEWDPILEELQFM	895.5	705	0.78727
Wild Type Peptide GVSEWDPILEELQEM, Peptide Substitution Scan (PEP201752521)	3	15	GVSEWDPILEELQGM	61	81.3333	1.33333
Wild Type Peptide GVSEWDPILEELQEM, Peptide Substitution Scan (PEP201752521)	3	16	GVSEWDPILEELQHM	257.333	85.1111	0.330743
Wild Type Peptide GVSEWDPILEELQEM, Peptide Substitution Scan (PEP201752521)	3	17	GVSEWDPILEELQIM	598.667	284.222	0.474759
Wild Type Peptide GVSEWDPILEELQEM, Peptide Substitution Scan (PEP201752521)	3	18	GVSEWDPILEELQKM	13.1667	17.5556	1.33333
Wild Type Peptide GVSEWDPILEELQEM, Peptide Substitution Scan (PEP201752521)	3	19	GVSEWDPILEELQLM	218.667	108.222	0.494919
Wild Type Peptide GVSEWDPILEELQEM, Peptide Substitution Scan (PEP201752521)	3	20	GVSEWDPILEELQMM	169	112.667	0.666667
Wild Type Peptide GVSEWDPILEELQEM, Peptide Substitution Scan (PEP201752521)	3	21	GVSEWDPILEELQNM	229.667	59.5556	0.259313
Wild Type Peptide GVSEWDPILEELQEM, Peptide Substitution Scan (PEP201752521)	3	22	GVSEWDPILEELQPM	275.667	168.444	0.611044
Wild Type Peptide GVSEWDPILEELQEM, Peptide Substitution Scan (PEP201752521)	3	23	GVSEWDPILEELQQM	95.6667	42.8889	0.448316
Wild Type Peptide GVSEWDPILEELQEM, Peptide Substitution Scan (PEP201752521)	3	24	GVSEWDPILEELQRM	3.33333	4.44444	1.33333
Wild Type Peptide GVSEWDPILEELQEM, Peptide Substitution Scan (PEP201752521)	3	25	GVSEWDPILEELQSM	129.5	86.3333	0.666667
Wild Type Peptide GVSEWDPILEELQEM, Peptide Substitution Scan (PEP201752521)	3	26	GVSEWDPILEELQTM	291.667	73.1111	0.250667
Wild Type Peptide GVSEWDPILEELQEM, Peptide Substitution Scan (PEP201752521)	3	27	GVSEWDPILEELQVM	398.167	287.222	0.721362
Wild Type Peptide GVSEWDPILEELQEM, Peptide Substitution Scan (PEP201752521)	3	28	GVSEWDPILEELQWM	410.5	90.3333	0.220057
Wild Type Peptide GVSEWDPILEELQEM, Peptide Substitution Scan (PEP201752521)	3	29	GVSEWDPILEELQYM	1315.33	161.778	0.122994
Wild Type Peptide GVSEWDPILEELQEM, Peptide Substitution Scan (PEP201752521)	3	30	GVSEWDPILEELQZM	8.33333	11.1111	1.33333
Wild Type Peptide GVSEWDPILEELQEM, Peptide Substitution Scan (PEP201752521)	3	31	GVSEWDPILEELQOM	171.333	95.7778	0.559014
Wild Type Peptide GVSEWDPILEELQEM, Peptide Substitution Scan (PEP201752521)	3	32	GVSEWDPILEELQUM	5	6.66667	1.33333
Wild Type Peptide GVSEWDPILEELQEM, Peptide Substitution Scan (PEP201752521)	4	10	GVSEWDPILEELAEM	778.333	392.444	0.504211
Wild Type Peptide GVSEWDPILEELQEM, Peptide Substitution Scan (PEP201752521)	4	11	GVSEWDPILEELCEM	3567.83	685.778	0.192211
Wild Type Peptide GVSEWDPILEELQEM, Peptide Substitution Scan (PEP201752521)	4	12	GVSEWDPILEELDEM	3956.67	366.222	0.0925583
Wild Type Peptide GVSEWDPILEELQEM, Peptide Substitution Scan (PEP201752521)	4	13	GVSEWDPILEELEEM	4504.67	275.556	0.0611711
Wild Type Peptide GVSEWDPILEELQEM, Peptide Substitution Scan (PEP201752521)	4	14	GVSEWDPILEELFEM	7625.33	1801.11	0.236201
Wild Type Peptide GVSEWDPILEELQEM, Peptide Substitution Scan (PEP201752521)	4	15	GVSEWDPILEELGEM	1203.67	167.778	0.139389
Wild Type Peptide GVSEWDPILEELQEM, Peptide Substitution Scan (PEP201752521)	4	16	GVSEWDPILEELHEM	1734.33	544.444	0.313921
Wild Type Peptide GVSEWDPILEELQEM, Peptide Substitution Scan (PEP201752521)	4	17	GVSEWDPILEELIEM	3486	249.333	0.0715242
Wild Type Peptide GVSEWDPILEELQEM, Peptide Substitution Scan (PEP201752521)	4	18	GVSEWDPILEELKEM	477.167	128.778	0.26988
Wild Type Peptide GVSEWDPILEELQEM, Peptide Substitution Scan (PEP201752521)	4	19	GVSEWDPILEELLEM	2345.33	330.222	0.1408
Wild Type Peptide GVSEWDPILEELQEM, Peptide Substitution Scan (PEP201752521)	4	20	GVSEWDPILEELMEM	1129.17	268.778	0.238032
Wild Type Peptide GVSEWDPILEELQEM, Peptide Substitution Scan (PEP201752521)	4	21	GVSEWDPILEELNEM	1501.33	284.222	0.189313
Wild Type Peptide GVSEWDPILEELQEM, Peptide Substitution Scan (PEP201752521)	4	22	GVSEWDPILEELPEM	1447.67	366.222	0.252974
Wild Type Peptide GVSEWDPILEELQEM, Peptide Substitution Scan (PEP201752521)	4	24	GVSEWDPILEELREM	1027.83	529.889	0.51554
Wild Type Peptide GVSEWDPILEELQEM, Peptide Substitution Scan (PEP201752521)	4	25	GVSEWDPILEELSEM	1516	770	0.507916
Wild Type Peptide GVSEWDPILEELQEM, Peptide Substitution Scan (PEP201752521)	4	26	GVSEWDPILEELTEM	2147.5	543	0.252852
Wild Type Peptide GVSEWDPILEELQEM, Peptide Substitution Scan (PEP201752521)	4	27	GVSEWDPILEELVEM	2321	703.333	0.30303
Wild Type Peptide GVSEWDPILEELQEM, Peptide Substitution Scan (PEP201752521)	4	28	GVSEWDPILEELWEM	3951.5	587.667	0.14872
Wild Type Peptide GVSEWDPILEELQEM, Peptide Substitution Scan (PEP201752521)	4	29	GVSEWDPILEELYEM	6888.33	633.889	0.0920236
Wild Type Peptide GVSEWDPILEELQEM, Peptide Substitution Scan (PEP201752521)	4	30	GVSEWDPILEELZEM	981.667	105.778	0.107753
Wild Type Peptide GVSEWDPILEELQEM, Peptide Substitution Scan (PEP201752521)	4	31	GVSEWDPILEELOEM	1388.67	130.444	0.093935
Wild Type Peptide GVSEWDPILEELQEM, Peptide Substitution Scan (PEP201752521)	4	32	GVSEWDPILEELUEM	972.833	51.5556	0.0529953
Wild Type Peptide GVSEWDPILEELQEM, Peptide Substitution Scan (PEP201752521)	5	10	GVSEWDPILEEAQEM	553.167	174.111	0.314753
Wild Type Peptide GVSEWDPILEELQEM, Peptide Substitution Scan (PEP201752521)	5	11	GVSEWDPILEECQEM	2317.17	167.556	0.0723105
Wild Type Peptide GVSEWDPILEELQEM, Peptide Substitution Scan (PEP201752521)	5	12	GVSEWDPILEEDQEM	2129.5	244	0.114581
Wild Type Peptide GVSEWDPILEELQEM, Peptide Substitution Scan (PEP201752521)	5	13	GVSEWDPILEEEQEM	2443.83	280.889	0.114938
Wild Type Peptide GVSEWDPILEELQEM, Peptide Substitution Scan (PEP201752521)	5	14	GVSEWDPILEEFQEM	5127.83	322.111	0.0628162
Wild Type Peptide GVSEWDPILEELQEM, Peptide Substitution Scan (PEP201752521)	5	15	GVSEWDPILEEGQEM	409.333	46.4444	0.113464
Wild Type Peptide GVSEWDPILEELQEM, Peptide Substitution Scan (PEP201752521)	5	16	GVSEWDPILEEHQEM	665	72.6667	0.109273
Wild Type Peptide GVSEWDPILEELQEM, Peptide Substitution Scan (PEP201752521)	5	17	GVSEWDPILEEIQEM	1038.17	269.556	0.259646
Wild Type Peptide GVSEWDPILEELQEM, Peptide Substitution Scan (PEP201752521)	5	18	GVSEWDPILEEKQEM	259.333	119.556	0.461011
Wild Type Peptide GVSEWDPILEELQEM, Peptide Substitution Scan (PEP201752521)	5	20	GVSEWDPILEEMQEM	779	84	0.107831
Wild Type Peptide GVSEWDPILEELQEM, Peptide Substitution Scan (PEP201752521)	5	21	GVSEWDPILEENQEM	819.833	229.778	0.280274
Wild Type Peptide GVSEWDPILEELQEM, Peptide Substitution Scan (PEP201752521)	5	22	GVSEWDPILEEPQEM	1212.17	51.2222	0.0422567
Wild Type Peptide GVSEWDPILEELQEM, Peptide Substitution Scan (PEP201752521)	5	23	GVSEWDPILEEQQEM	649.333	14.2222	0.0219028
Wild Type Peptide GVSEWDPILEELQEM, Peptide Substitution Scan (PEP201752521)	5	24	GVSEWDPILEERQEM	624.833	89.5556	0.143327
Wild Type Peptide GVSEWDPILEELQEM, Peptide Substitution Scan (PEP201752521)	5	25	GVSEWDPILEESQEM	964.5	53.6667	0.055642
Wild Type Peptide GVSEWDPILEELQEM, Peptide Substitution Scan (PEP201752521)	5	26	GVSEWDPILEETQEM	1056.5	155	0.146711
Wild Type Peptide GVSEWDPILEELQEM, Peptide Substitution Scan (PEP201752521)	5	27	GVSEWDPILEEVQEM	899	42.6667	0.0474601
Wild Type Peptide GVSEWDPILEELQEM, Peptide Substitution Scan (PEP201752521)	5	28	GVSEWDPILEEWQEM	2038.33	154.444	0.07577
Wild Type Peptide GVSEWDPILEELQEM, Peptide Substitution Scan (PEP201752521)	5	29	GVSEWDPILEEYQEM	3670.17	524.889	0.143015
Wild Type Peptide GVSEWDPILEELQEM, Peptide Substitution Scan (PEP201752521)	5	30	GVSEWDPILEEZQEM	667.333	149.556	0.224109
Wild Type Peptide GVSEWDPILEELQEM, Peptide Substitution Scan (PEP201752521)	5	31	GVSEWDPILEEOQEM	770.333	106.444	0.13818
Wild Type Peptide GVSEWDPILEELQEM, Peptide Substitution Scan (PEP201752521)	5	32	GVSEWDPILEEUQEM	152	170	1.11842
Wild Type Peptide GVSEWDPILEELQEM, Peptide Substitution Scan (PEP201752521)	6	10	GVSEWDPILEALQEM	115	152.667	1.32754
Wild Type Peptide GVSEWDPILEELQEM, Peptide Substitution Scan (PEP201752521)	6	11	GVSEWDPILECLQEM	801.167	260.778	0.325498
Wild Type Peptide GVSEWDPILEELQEM, Peptide Substitution Scan (PEP201752521)	6	12	GVSEWDPILEDLQEM	1633.67	234.444	0.143508
Wild Type Peptide GVSEWDPILEELQEM, Peptide Substitution Scan (PEP201752521)	6	14	GVSEWDPILEFLQEM	1233	225	0.182482
Wild Type Peptide GVSEWDPILEELQEM, Peptide Substitution Scan (PEP201752521)	6	15	GVSEWDPILEGLQEM	185	91.3333	0.493694
Wild Type Peptide GVSEWDPILEELQEM, Peptide Substitution Scan (PEP201752521)	6	16	GVSEWDPILEHLQEM	144	115.333	0.800926
Wild Type Peptide GVSEWDPILEELQEM, Peptide Substitution Scan (PEP201752521)	6	17	GVSEWDPILEILQEM	640	79.3333	0.123958
Wild Type Peptide GVSEWDPILEELQEM, Peptide Substitution Scan (PEP201752521)	6	18	GVSEWDPILEKLQEM	74	49.3333	0.666667
Wild Type Peptide GVSEWDPILEELQEM, Peptide Substitution Scan (PEP201752521)	6	19	GVSEWDPILELLQEM	459.667	74.8889	0.16292
Wild Type Peptide GVSEWDPILEELQEM, Peptide Substitution Scan (PEP201752521)	6	20	GVSEWDPILEMLQEM	181	38.6667	0.213628
Wild Type Peptide GVSEWDPILEELQEM, Peptide Substitution Scan (PEP201752521)	6	21	GVSEWDPILENLQEM	189	88.6667	0.469136
Wild Type Peptide GVSEWDPILEELQEM, Peptide Substitution Scan (PEP201752521)	6	22	GVSEWDPILEPLQEM	375.333	101.556	0.270574
Wild Type Peptide GVSEWDPILEELQEM, Peptide Substitution Scan (PEP201752521)	6	23	GVSEWDPILEQLQEM	156.667	104.444	0.666667
Wild Type Peptide GVSEWDPILEELQEM, Peptide Substitution Scan (PEP201752521)	6	24	GVSEWDPILERLQEM	132	88	0.666667
Wild Type Peptide GVSEWDPILEELQEM, Peptide Substitution Scan (PEP201752521)	6	25	GVSEWDPILESLQEM	318.667	118.444	0.371688
Wild Type Peptide GVSEWDPILEELQEM, Peptide Substitution Scan (PEP201752521)	6	26	GVSEWDPILETLQEM	276.5	184.333	0.666667
Wild Type Peptide GVSEWDPILEELQEM, Peptide Substitution Scan (PEP201752521)	6	27	GVSEWDPILEVLQEM	337.167	75.8889	0.225078
Wild Type Peptide GVSEWDPILEELQEM, Peptide Substitution Scan (PEP201752521)	6	28	GVSEWDPILEWLQEM	498.667	155.778	0.312389
Wild Type Peptide GVSEWDPILEELQEM, Peptide Substitution Scan (PEP201752521)	6	29	GVSEWDPILEYLQEM	1189.33	112.111	0.0942638
Wild Type Peptide GVSEWDPILEELQEM, Peptide Substitution Scan (PEP201752521)	6	30	GVSEWDPILEZLQEM	193.833	129.222	0.666667
Wild Type Peptide GVSEWDPILEELQEM, Peptide Substitution Scan (PEP201752521)	6	31	GVSEWDPILEOLQEM	372	200.667	0.539427
Wild Type Peptide GVSEWDPILEELQEM, Peptide Substitution Scan (PEP201752521)	6	32	GVSEWDPILEULQEM	262.667	326.222	1.24196
Wild Type Peptide GVSEWDPILEELQEM, Peptide Substitution Scan (PEP201752521)	7	10	GVSEWDPILAELQEM	183	122	0.666667
Wild Type Peptide GVSEWDPILEELQEM, Peptide Substitution Scan (PEP201752521)	7	11	GVSEWDPILCELQEM	1211.33	106.222	0.0876903
Wild Type Peptide GVSEWDPILEELQEM, Peptide Substitution Scan (PEP201752521)	7	12	GVSEWDPILDELQEM	1533.67	244.222	0.159241
Wild Type Peptide GVSEWDPILEELQEM, Peptide Substitution Scan (PEP201752521)	7	14	GVSEWDPILFELQEM	1788.33	460.444	0.257471
Wild Type Peptide GVSEWDPILEELQEM, Peptide Substitution Scan (PEP201752521)	7	15	GVSEWDPILGELQEM	183	214.667	1.17304
Wild Type Peptide GVSEWDPILEELQEM, Peptide Substitution Scan (PEP201752521)	7	16	GVSEWDPILHELQEM	294.5	223.333	0.758347
Wild Type Peptide GVSEWDPILEELQEM, Peptide Substitution Scan (PEP201752521)	7	17	GVSEWDPILIELQEM	3480.83	1149.78	0.330317
Wild Type Peptide GVSEWDPILEELQEM, Peptide Substitution Scan (PEP201752521)	7	18	GVSEWDPILKELQEM	71	63.3333	0.892019
Wild Type Peptide GVSEWDPILEELQEM, Peptide Substitution Scan (PEP201752521)	7	19	GVSEWDPILLELQEM	1135.33	230.111	0.202682
Wild Type Peptide GVSEWDPILEELQEM, Peptide Substitution Scan (PEP201752521)	7	20	GVSEWDPILMELQEM	171.333	15.7778	0.0920882
Wild Type Peptide GVSEWDPILEELQEM, Peptide Substitution Scan (PEP201752521)	7	21	GVSEWDPILNELQEM	251.5	90	0.357853
Wild Type Peptide GVSEWDPILEELQEM, Peptide Substitution Scan (PEP201752521)	7	22	GVSEWDPILPELQEM	401.833	139.444	0.347021
Wild Type Peptide GVSEWDPILEELQEM, Peptide Substitution Scan (PEP201752521)	7	23	GVSEWDPILQELQEM	127.667	85.1111	0.666667
Wild Type Peptide GVSEWDPILEELQEM, Peptide Substitution Scan (PEP201752521)	7	24	GVSEWDPILRELQEM	75.6667	50.4444	0.666667
Wild Type Peptide GVSEWDPILEELQEM, Peptide Substitution Scan (PEP201752521)	7	25	GVSEWDPILSELQEM	208	54	0.259615
Wild Type Peptide GVSEWDPILEELQEM, Peptide Substitution Scan (PEP201752521)	7	26	GVSEWDPILTELQEM	350.5	99.6667	0.284356
Wild Type Peptide GVSEWDPILEELQEM, Peptide Substitution Scan (PEP201752521)	7	27	GVSEWDPILVELQEM	3509.17	379.444	0.10813
Wild Type Peptide GVSEWDPILEELQEM, Peptide Substitution Scan (PEP201752521)	7	28	GVSEWDPILWELQEM	827.833	81.8889	0.0989195
Wild Type Peptide GVSEWDPILEELQEM, Peptide Substitution Scan (PEP201752521)	7	29	GVSEWDPILYELQEM	1167.17	367.222	0.314627
Wild Type Peptide GVSEWDPILEELQEM, Peptide Substitution Scan (PEP201752521)	7	30	GVSEWDPILZELQEM	153.333	102.222	0.666667
Wild Type Peptide GVSEWDPILEELQEM, Peptide Substitution Scan (PEP201752521)	7	31	GVSEWDPILOELQEM	386.167	253.444	0.656308
Wild Type Peptide GVSEWDPILEELQEM, Peptide Substitution Scan (PEP201752521)	7	32	GVSEWDPILUELQEM	91.6667	61.1111	0.666667
Wild Type Peptide GVSEWDPILEELQEM, Peptide Substitution Scan (PEP201752521)	8	10	GVSEWDPIAEELQEM	523.333	165.556	0.316348
Wild Type Peptide GVSEWDPILEELQEM, Peptide Substitution Scan (PEP201752521)	8	11	GVSEWDPICEELQEM	2373.83	101.444	0.0427344
Wild Type Peptide GVSEWDPILEELQEM, Peptide Substitution Scan (PEP201752521)	8	12	GVSEWDPIDEELQEM	2295	432.667	0.188526
Wild Type Peptide GVSEWDPILEELQEM, Peptide Substitution Scan (PEP201752521)	8	13	GVSEWDPIEEELQEM	2560.5	647.333	0.252815
Wild Type Peptide GVSEWDPILEELQEM, Peptide Substitution Scan (PEP201752521)	8	14	GVSEWDPIFEELQEM	3759.17	1596.56	0.42471
Wild Type Peptide GVSEWDPILEELQEM, Peptide Substitution Scan (PEP201752521)	8	15	GVSEWDPIGEELQEM	324.833	63.4444	0.195314
Wild Type Peptide GVSEWDPILEELQEM, Peptide Substitution Scan (PEP201752521)	8	16	GVSEWDPIHEELQEM	440.667	37.5556	0.0852244
Wild Type Peptide GVSEWDPILEELQEM, Peptide Substitution Scan (PEP201752521)	8	17	GVSEWDPIIEELQEM	1520.33	133.111	0.0875539
Wild Type Peptide GVSEWDPILEELQEM, Peptide Substitution Scan (PEP201752521)	8	18	GVSEWDPIKEELQEM	249.667	69.5556	0.278594
Wild Type Peptide GVSEWDPILEELQEM, Peptide Substitution Scan (PEP201752521)	8	20	GVSEWDPIMEELQEM	406	54	0.133005
Wild Type Peptide GVSEWDPILEELQEM, Peptide Substitution Scan (PEP201752521)	8	21	GVSEWDPINEELQEM	685	137.333	0.200487
Wild Type Peptide GVSEWDPILEELQEM, Peptide Substitution Scan (PEP201752521)	8	22	GVSEWDPIPEELQEM	473.667	111.556	0.235515
Wild Type Peptide GVSEWDPILEELQEM, Peptide Substitution Scan (PEP201752521)	8	23	GVSEWDPIQEELQEM	539	174	0.32282
Wild Type Peptide GVSEWDPILEELQEM, Peptide Substitution Scan (PEP201752521)	8	24	GVSEWDPIREELQEM	366.333	113.556	0.309979
Wild Type Peptide GVSEWDPILEELQEM, Peptide Substitution Scan (PEP201752521)	8	25	GVSEWDPISEELQEM	588.333	57.5556	0.0978281
Wild Type Peptide GVSEWDPILEELQEM, Peptide Substitution Scan (PEP201752521)	8	26	GVSEWDPITEELQEM	595.667	143.778	0.241373
Wild Type Peptide GVSEWDPILEELQEM, Peptide Substitution Scan (PEP201752521)	8	27	GVSEWDPIVEELQEM	1051	202	0.192198
Wild Type Peptide GVSEWDPILEELQEM, Peptide Substitution Scan (PEP201752521)	8	28	GVSEWDPIWEELQEM	4002.5	125.667	0.031397
Wild Type Peptide GVSEWDPILEELQEM, Peptide Substitution Scan (PEP201752521)	8	29	GVSEWDPIYEELQEM	2421.5	791.333	0.326795
Wild Type Peptide GVSEWDPILEELQEM, Peptide Substitution Scan (PEP201752521)	8	30	GVSEWDPIZEELQEM	236.167	113.444	0.480358
Wild Type Peptide GVSEWDPILEELQEM, Peptide Substitution Scan (PEP201752521)	8	31	GVSEWDPIOEELQEM	134.333	89.5556	0.666667
Wild Type Peptide GVSEWDPILEELQEM, Peptide Substitution Scan (PEP201752521)	8	32	GVSEWDPIUEELQEM	637.833	164.444	0.257817
Wild Type Peptide GVSEWDPILEELQEM, Peptide Substitution Scan (PEP201752521)	9	10	GVSEWDPALEELQEM	418.333	203.556	0.486587
Wild Type Peptide GVSEWDPILEELQEM, Peptide Substitution Scan (PEP201752521)	9	11	GVSEWDPCLEELQEM	2343.83	471.444	0.201142
Wild Type Peptide GVSEWDPILEELQEM, Peptide Substitution Scan (PEP201752521)	9	12	GVSEWDPDLEELQEM	2872	177.333	0.0617456
Wild Type Peptide GVSEWDPILEELQEM, Peptide Substitution Scan (PEP201752521)	9	13	GVSEWDPELEELQEM	1927.67	617.111	0.320134
Wild Type Peptide GVSEWDPILEELQEM, Peptide Substitution Scan (PEP201752521)	9	14	GVSEWDPFLEELQEM	3623	642	0.177201
Wild Type Peptide GVSEWDPILEELQEM, Peptide Substitution Scan (PEP201752521)	9	15	GVSEWDPGLEELQEM	303.667	36.4444	0.120015
Wild Type Peptide GVSEWDPILEELQEM, Peptide Substitution Scan (PEP201752521)	9	16	GVSEWDPHLEELQEM	401.333	44.8889	0.111849
Wild Type Peptide GVSEWDPILEELQEM, Peptide Substitution Scan (PEP201752521)	9	18	GVSEWDPKLEELQEM	262	80	0.305344
Wild Type Peptide GVSEWDPILEELQEM, Peptide Substitution Scan (PEP201752521)	9	19	GVSEWDPLLEELQEM	1604.33	200.222	0.124801
Wild Type Peptide GVSEWDPILEELQEM, Peptide Substitution Scan (PEP201752521)	9	20	GVSEWDPMLEELQEM	378	96.6667	0.255732
Wild Type Peptide GVSEWDPILEELQEM, Peptide Substitution Scan (PEP201752521)	9	21	GVSEWDPNLEELQEM	469	30	0.0639659
Wild Type Peptide GVSEWDPILEELQEM, Peptide Substitution Scan (PEP201752521)	9	22	GVSEWDPPLEELQEM	272.833	104.778	0.384036
Wild Type Peptide GVSEWDPILEELQEM, Peptide Substitution Scan (PEP201752521)	9	23	GVSEWDPQLEELQEM	469	122.667	0.261549
Wild Type Peptide GVSEWDPILEELQEM, Peptide Substitution Scan (PEP201752521)	9	24	GVSEWDPRLEELQEM	244.333	108.444	0.443838
Wild Type Peptide GVSEWDPILEELQEM, Peptide Substitution Scan (PEP201752521)	9	25	GVSEWDPSLEELQEM	394.167	58.4444	0.148273
Wild Type Peptide GVSEWDPILEELQEM, Peptide Substitution Scan (PEP201752521)	9	26	GVSEWDPTLEELQEM	441.667	49.5556	0.112201
Wild Type Peptide GVSEWDPILEELQEM, Peptide Substitution Scan (PEP201752521)	9	27	GVSEWDPVLEELQEM	850.5	115.333	0.135607
Wild Type Peptide GVSEWDPILEELQEM, Peptide Substitution Scan (PEP201752521)	9	28	GVSEWDPWLEELQEM	2864.83	334.889	0.116896
Wild Type Peptide GVSEWDPILEELQEM, Peptide Substitution Scan (PEP201752521)	9	29	GVSEWDPYLEELQEM	2338.67	445.556	0.190517
Wild Type Peptide GVSEWDPILEELQEM, Peptide Substitution Scan (PEP201752521)	9	30	GVSEWDPZLEELQEM	182	121.333	0.666667
Wild Type Peptide GVSEWDPILEELQEM, Peptide Substitution Scan (PEP201752521)	9	31	GVSEWDPOLEELQEM	47.6667	39.5556	0.829837
Wild Type Peptide GVSEWDPILEELQEM, Peptide Substitution Scan (PEP201752521)	9	32	GVSEWDPULEELQEM	215.333	145.778	0.676987
Wild Type Peptide GVSEWDPILEELQEM, Peptide Substitution Scan (PEP201752521)	10	10	GVSEWDAILEELQEM	1760.33	813.111	0.461907
Wild Type Peptide GVSEWDPILEELQEM, Peptide Substitution Scan (PEP201752521)	10	11	GVSEWDCILEELQEM	6426.17	1337.56	0.208142
Wild Type Peptide GVSEWDPILEELQEM, Peptide Substitution Scan (PEP201752521)	10	12	GVSEWDDILEELQEM	8508.67	1437.56	0.168952
Wild Type Peptide GVSEWDPILEELQEM, Peptide Substitution Scan (PEP201752521)	10	13	GVSEWDEILEELQEM	7848.83	1734.78	0.221024
Wild Type Peptide GVSEWDPILEELQEM, Peptide Substitution Scan (PEP201752521)	10	14	GVSEWDFILEELQEM	24305.7	4312.22	0.177416
Wild Type Peptide GVSEWDPILEELQEM, Peptide Substitution Scan (PEP201752521)	10	15	GVSEWDGILEELQEM	622.333	112.889	0.181396
Wild Type Peptide GVSEWDPILEELQEM, Peptide Substitution Scan (PEP201752521)	10	16	GVSEWDHILEELQEM	1738.67	302.444	0.173952
Wild Type Peptide GVSEWDPILEELQEM, Peptide Substitution Scan (PEP201752521)	10	17	GVSEWDIILEELQEM	10150.5	797	0.0785183
Wild Type Peptide GVSEWDPILEELQEM, Peptide Substitution Scan (PEP201752521)	10	18	GVSEWDKILEELQEM	888.5	52.3333	0.0589008
Wild Type Peptide GVSEWDPILEELQEM, Peptide Substitution Scan (PEP201752521)	10	19	GVSEWDLILEELQEM	11008.3	1243.78	0.112985
Wild Type Peptide GVSEWDPILEELQEM, Peptide Substitution Scan (PEP201752521)	10	20	GVSEWDMILEELQEM	1768.67	339.556	0.191984
Wild Type Peptide GVSEWDPILEELQEM, Peptide Substitution Scan (PEP201752521)	10	21	GVSEWDNILEELQEM	1436.33	54.4444	0.0379052
Wild Type Peptide GVSEWDPILEELQEM, Peptide Substitution Scan (PEP201752521)	10	23	GVSEWDQILEELQEM	1539.67	105.778	0.0687017
Wild Type Peptide GVSEWDPILEELQEM, Peptide Substitution Scan (PEP201752521)	10	24	GVSEWDRILEELQEM	810.667	134.444	0.165844
Wild Type Peptide GVSEWDPILEELQEM, Peptide Substitution Scan (PEP201752521)	10	25	GVSEWDSILEELQEM	1530.33	238.222	0.155667
Wild Type Peptide GVSEWDPILEELQEM, Peptide Substitution Scan (PEP201752521)	10	26	GVSEWDTILEELQEM	1486.17	117.889	0.0793241
Wild Type Peptide GVSEWDPILEELQEM, Peptide Substitution Scan (PEP201752521)	10	27	GVSEWDVILEELQEM	6974.17	822.222	0.117895
Wild Type Peptide GVSEWDPILEELQEM, Peptide Substitution Scan (PEP201752521)	10	28	GVSEWDWILEELQEM	9520	612	0.0642857
Wild Type Peptide GVSEWDPILEELQEM, Peptide Substitution Scan (PEP201752521)	10	29	GVSEWDYILEELQEM	17372.3	4011.11	0.230891
Wild Type Peptide GVSEWDPILEELQEM, Peptide Substitution Scan (PEP201752521)	10	30	GVSEWDZILEELQEM	1302.33	132.222	0.101527
Wild Type Peptide GVSEWDPILEELQEM, Peptide Substitution Scan (PEP201752521)	10	31	GVSEWDOILEELQEM	1942.67	321.778	0.165637
Wild Type Peptide GVSEWDPILEELQEM, Peptide Substitution Scan (PEP201752521)	10	32	GVSEWDUILEELQEM	556	41	0.073741
Wild Type Peptide GVSEWDPILEELQEM, Peptide Substitution Scan (PEP201752521)	11	10	GVSEWAPILEELQEM	0	0	0
Wild Type Peptide GVSEWDPILEELQEM, Peptide Substitution Scan (PEP201752521)	11	11	GVSEWCPILEELQEM	653.333	287.111	0.439456
Wild Type Peptide GVSEWDPILEELQEM, Peptide Substitution Scan (PEP201752521)	11	13	GVSEWEPILEELQEM	1534	483.333	0.31508
Wild Type Peptide GVSEWDPILEELQEM, Peptide Substitution Scan (PEP201752521)	11	14	GVSEWFPILEELQEM	253	149.333	0.59025
Wild Type Peptide GVSEWDPILEELQEM, Peptide Substitution Scan (PEP201752521)	11	15	GVSEWGPILEELQEM	37.6667	13.7778	0.365782
Wild Type Peptide GVSEWDPILEELQEM, Peptide Substitution Scan (PEP201752521)	11	16	GVSEWHPILEELQEM	9	6	0.666667
Wild Type Peptide GVSEWDPILEELQEM, Peptide Substitution Scan (PEP201752521)	11	17	GVSEWIPILEELQEM	296.833	51.7778	0.174434
Wild Type Peptide GVSEWDPILEELQEM, Peptide Substitution Scan (PEP201752521)	11	18	GVSEWKPILEELQEM	0	0	0
Wild Type Peptide GVSEWDPILEELQEM, Peptide Substitution Scan (PEP201752521)	11	19	GVSEWLPILEELQEM	107	47.3333	0.442368
Wild Type Peptide GVSEWDPILEELQEM, Peptide Substitution Scan (PEP201752521)	11	20	GVSEWMPILEELQEM	62.3333	45.1111	0.723708
Wild Type Peptide GVSEWDPILEELQEM, Peptide Substitution Scan (PEP201752521)	11	21	GVSEWNPILEELQEM	8.66667	5.77778	0.666667
Wild Type Peptide GVSEWDPILEELQEM, Peptide Substitution Scan (PEP201752521)	11	22	GVSEWPPILEELQEM	25	33.3333	1.33333
Wild Type Peptide GVSEWDPILEELQEM, Peptide Substitution Scan (PEP201752521)	11	23	GVSEWQPILEELQEM	47	44	0.93617
Wild Type Peptide GVSEWDPILEELQEM, Peptide Substitution Scan (PEP201752521)	11	24	GVSEWRPILEELQEM	0	0	0
Wild Type Peptide GVSEWDPILEELQEM, Peptide Substitution Scan (PEP201752521)	11	25	GVSEWSPILEELQEM	26.1667	34.8889	1.33333
Wild Type Peptide GVSEWDPILEELQEM, Peptide Substitution Scan (PEP201752521)	11	26	GVSEWTPILEELQEM	90	68	0.755556
Wild Type Peptide GVSEWDPILEELQEM, Peptide Substitution Scan (PEP201752521)	11	27	GVSEWVPILEELQEM	370.667	20.4444	0.0551559
Wild Type Peptide GVSEWDPILEELQEM, Peptide Substitution Scan (PEP201752521)	11	28	GVSEWWPILEELQEM	39	52	1.33333
Wild Type Peptide GVSEWDPILEELQEM, Peptide Substitution Scan (PEP201752521)	11	29	GVSEWYPILEELQEM	343	133.333	0.388727
Wild Type Peptide GVSEWDPILEELQEM, Peptide Substitution Scan (PEP201752521)	11	30	GVSEWZPILEELQEM	0	0	0
Wild Type Peptide GVSEWDPILEELQEM, Peptide Substitution Scan (PEP201752521)	11	31	GVSEWOPILEELQEM	0	0	0
Wild Type Peptide GVSEWDPILEELQEM, Peptide Substitution Scan (PEP201752521)	11	32	GVSEWUPILEELQEM	0	0	0
Wild Type Peptide GVSEWDPILEELQEM, Peptide Substitution Scan (PEP201752521)	12	10	GVSEADPILEELQEM	0	0	0
Wild Type Peptide GVSEWDPILEELQEM, Peptide Substitution Scan (PEP201752521)	12	11	GVSECDPILEELQEM	469.667	123.556	0.263071
Wild Type Peptide GVSEWDPILEELQEM, Peptide Substitution Scan (PEP201752521)	12	12	GVSEDDPILEELQEM	96.3333	29.7778	0.309112
Wild Type Peptide GVSEWDPILEELQEM, Peptide Substitution Scan (PEP201752521)	12	13	GVSEEDPILEELQEM	161	36	0.223602
Wild Type Peptide GVSEWDPILEELQEM, Peptide Substitution Scan (PEP201752521)	12	14	GVSEFDPILEELQEM	357.5	52.3333	0.146387
Wild Type Peptide GVSEWDPILEELQEM, Peptide Substitution Scan (PEP201752521)	12	15	GVSEGDPILEELQEM	0	0	0
Wild Type Peptide GVSEWDPILEELQEM, Peptide Substitution Scan (PEP201752521)	12	16	GVSEHDPILEELQEM	0	0	0
Wild Type Peptide GVSEWDPILEELQEM, Peptide Substitution Scan (PEP201752521)	12	17	GVSEIDPILEELQEM	0	0	0
Wild Type Peptide GVSEWDPILEELQEM, Peptide Substitution Scan (PEP201752521)	12	18	GVSEKDPILEELQEM	0	0	0
Wild Type Peptide GVSEWDPILEELQEM, Peptide Substitution Scan (PEP201752521)	12	19	GVSELDPILEELQEM	27	30.6667	1.1358
Wild Type Peptide GVSEWDPILEELQEM, Peptide Substitution Scan (PEP201752521)	12	20	GVSEMDPILEELQEM	2	2.66667	1.33333
Wild Type Peptide GVSEWDPILEELQEM, Peptide Substitution Scan (PEP201752521)	12	21	GVSENDPILEELQEM	0	0	0
Wild Type Peptide GVSEWDPILEELQEM, Peptide Substitution Scan (PEP201752521)	12	22	GVSEPDPILEELQEM	0	0	0
Wild Type Peptide GVSEWDPILEELQEM, Peptide Substitution Scan (PEP201752521)	12	23	GVSEQDPILEELQEM	0	0	0
Wild Type Peptide GVSEWDPILEELQEM, Peptide Substitution Scan (PEP201752521)	12	24	GVSERDPILEELQEM	0	0	0
Wild Type Peptide GVSEWDPILEELQEM, Peptide Substitution Scan (PEP201752521)	12	25	GVSESDPILEELQEM	7.33333	9.77778	1.33333
Wild Type Peptide GVSEWDPILEELQEM, Peptide Substitution Scan (PEP201752521)	12	26	GVSETDPILEELQEM	6.66667	8.88889	1.33333
Wild Type Peptide GVSEWDPILEELQEM, Peptide Substitution Scan (PEP201752521)	12	27	GVSEVDPILEELQEM	7	9.33333	1.33333
Wild Type Peptide GVSEWDPILEELQEM, Peptide Substitution Scan (PEP201752521)	12	29	GVSEYDPILEELQEM	411	188	0.457421
Wild Type Peptide GVSEWDPILEELQEM, Peptide Substitution Scan (PEP201752521)	12	30	GVSEZDPILEELQEM	0	0	0
Wild Type Peptide GVSEWDPILEELQEM, Peptide Substitution Scan (PEP201752521)	12	31	GVSEODPILEELQEM	0	0	0
Wild Type Peptide GVSEWDPILEELQEM, Peptide Substitution Scan (PEP201752521)	12	32	GVSEUDPILEELQEM	6.33333	8.44444	1.33333
Wild Type Peptide GVSEWDPILEELQEM, Peptide Substitution Scan (PEP201752521)	13	10	GVSAWDPILEELQEM	243.333	88.2222	0.362557
Wild Type Peptide GVSEWDPILEELQEM, Peptide Substitution Scan (PEP201752521)	13	11	GVSCWDPILEELQEM	904.667	219.556	0.242692
Wild Type Peptide GVSEWDPILEELQEM, Peptide Substitution Scan (PEP201752521)	13	12	GVSDWDPILEELQEM	1852.5	410	0.221323
Wild Type Peptide GVSEWDPILEELQEM, Peptide Substitution Scan (PEP201752521)	13	14	GVSFWDPILEELQEM	294.333	116.889	0.397131
Wild Type Peptide GVSEWDPILEELQEM, Peptide Substitution Scan (PEP201752521)	13	15	GVSGWDPILEELQEM	415	66.6667	0.160643
Wild Type Peptide GVSEWDPILEELQEM, Peptide Substitution Scan (PEP201752521)	13	16	GVSHWDPILEELQEM	230	13.3333	0.057971
Wild Type Peptide GVSEWDPILEELQEM, Peptide Substitution Scan (PEP201752521)	13	17	GVSIWDPILEELQEM	324	47.3333	0.146091
Wild Type Peptide GVSEWDPILEELQEM, Peptide Substitution Scan (PEP201752521)	13	18	GVSKWDPILEELQEM	159.667	42.2222	0.26444
Wild Type Peptide GVSEWDPILEELQEM, Peptide Substitution Scan (PEP201752521)	13	19	GVSLWDPILEELQEM	195	74	0.379487
Wild Type Peptide GVSEWDPILEELQEM, Peptide Substitution Scan (PEP201752521)	13	20	GVSMWDPILEELQEM	197	44	0.22335
Wild Type Peptide GVSEWDPILEELQEM, Peptide Substitution Scan (PEP201752521)	13	21	GVSNWDPILEELQEM	245	107.333	0.438095
Wild Type Peptide GVSEWDPILEELQEM, Peptide Substitution Scan (PEP201752521)	13	22	GVSPWDPILEELQEM	250.833	82.7778	0.330011
Wild Type Peptide GVSEWDPILEELQEM, Peptide Substitution Scan (PEP201752521)	13	23	GVSQWDPILEELQEM	262.5	52.3333	0.199365
Wild Type Peptide GVSEWDPILEELQEM, Peptide Substitution Scan (PEP201752521)	13	24	GVSRWDPILEELQEM	181.333	31.7778	0.175245
Wild Type Peptide GVSEWDPILEELQEM, Peptide Substitution Scan (PEP201752521)	13	25	GVSSWDPILEELQEM	291	52.6667	0.180985
Wild Type Peptide GVSEWDPILEELQEM, Peptide Substitution Scan (PEP201752521)	13	26	GVSTWDPILEELQEM	223.667	82.8889	0.370591
Wild Type Peptide GVSEWDPILEELQEM, Peptide Substitution Scan (PEP201752521)	13	27	GVSVWDPILEELQEM	282.333	64.4444	0.228257
Wild Type Peptide GVSEWDPILEELQEM, Peptide Substitution Scan (PEP201752521)	13	28	GVSWWDPILEELQEM	356.5	29	0.0813464
Wild Type Peptide GVSEWDPILEELQEM, Peptide Substitution Scan (PEP201752521)	13	29	GVSYWDPILEELQEM	286.667	200.889	0.700775
Wild Type Peptide GVSEWDPILEELQEM, Peptide Substitution Scan (PEP201752521)	13	30	GVSZWDPILEELQEM	170.667	116.889	0.684896
Wild Type Peptide GVSEWDPILEELQEM, Peptide Substitution Scan (PEP201752521)	13	31	GVSOWDPILEELQEM	138	122	0.884058
Wild Type Peptide GVSEWDPILEELQEM, Peptide Substitution Scan (PEP201752521)	13	32	GVSUWDPILEELQEM	187.667	64.4444	0.343398
Wild Type Peptide GVSEWDPILEELQEM, Peptide Substitution Scan (PEP201752521)	14	10	GVAEWDPILEELQEM	1398	436	0.311874
Wild Type Peptide GVSEWDPILEELQEM, Peptide Substitution Scan (PEP201752521)	14	11	GVCEWDPILEELQEM	3236	655.333	0.202513
Wild Type Peptide GVSEWDPILEELQEM, Peptide Substitution Scan (PEP201752521)	14	12	GVDEWDPILEELQEM	4296.67	1052.89	0.245048
Wild Type Peptide GVSEWDPILEELQEM, Peptide Substitution Scan (PEP201752521)	14	13	GVEEWDPILEELQEM	4148.5	1183.67	0.285324
Wild Type Peptide GVSEWDPILEELQEM, Peptide Substitution Scan (PEP201752521)	14	14	GVFEWDPILEELQEM	2110.67	630.222	0.298589
Wild Type Peptide GVSEWDPILEELQEM, Peptide Substitution Scan (PEP201752521)	14	15	GVGEWDPILEELQEM	1429.33	255.111	0.178483
Wild Type Peptide GVSEWDPILEELQEM, Peptide Substitution Scan (PEP201752521)	14	16	GVHEWDPILEELQEM	1113	281.333	0.25277
Wild Type Peptide GVSEWDPILEELQEM, Peptide Substitution Scan (PEP201752521)	14	17	GVIEWDPILEELQEM	1894	348.667	0.18409
Wild Type Peptide GVSEWDPILEELQEM, Peptide Substitution Scan (PEP201752521)	14	18	GVKEWDPILEELQEM	791.333	149.778	0.189273
Wild Type Peptide GVSEWDPILEELQEM, Peptide Substitution Scan (PEP201752521)	14	19	GVLEWDPILEELQEM	1508.33	225.778	0.149687
Wild Type Peptide GVSEWDPILEELQEM, Peptide Substitution Scan (PEP201752521)	14	20	GVMEWDPILEELQEM	1023.83	210.778	0.205871
Wild Type Peptide GVSEWDPILEELQEM, Peptide Substitution Scan (PEP201752521)	14	21	GVNEWDPILEELQEM	1352.17	160.778	0.118904
Wild Type Peptide GVSEWDPILEELQEM, Peptide Substitution Scan (PEP201752521)	14	22	GVPEWDPILEELQEM	977.667	42.2222	0.0431867
Wild Type Peptide GVSEWDPILEELQEM, Peptide Substitution Scan (PEP201752521)	14	23	GVQEWDPILEELQEM	1534.83	148.889	0.0970066
Wild Type Peptide GVSEWDPILEELQEM, Peptide Substitution Scan (PEP201752521)	14	24	GVREWDPILEELQEM	1326.5	346	0.260837
Wild Type Peptide GVSEWDPILEELQEM, Peptide Substitution Scan (PEP201752521)	14	26	GVTEWDPILEELQEM	1333.67	133.778	0.100308
Wild Type Peptide GVSEWDPILEELQEM, Peptide Substitution Scan (PEP201752521)	14	27	GVVEWDPILEELQEM	1544.33	316.111	0.204691
Wild Type Peptide GVSEWDPILEELQEM, Peptide Substitution Scan (PEP201752521)	14	28	GVWEWDPILEELQEM	3385	834	0.246381
Wild Type Peptide GVSEWDPILEELQEM, Peptide Substitution Scan (PEP201752521)	14	29	GVYEWDPILEELQEM	1998.67	549.556	0.274961
Wild Type Peptide GVSEWDPILEELQEM, Peptide Substitution Scan (PEP201752521)	14	30	GVZEWDPILEELQEM	1274.17	359.889	0.28245
Wild Type Peptide GVSEWDPILEELQEM, Peptide Substitution Scan (PEP201752521)	14	31	GVOEWDPILEELQEM	1088.33	193.111	0.177437
Wild Type Peptide GVSEWDPILEELQEM, Peptide Substitution Scan (PEP201752521)	14	32	GVUEWDPILEELQEM	1322	206.667	0.156329
Wild Type Peptide GVSEWDPILEELQEM, Peptide Substitution Scan (PEP201752521)	15	10	GASEWDPILEELQEM	1376.5	339.667	0.246761
Wild Type Peptide GVSEWDPILEELQEM, Peptide Substitution Scan (PEP201752521)	15	11	GCSEWDPILEELQEM	3269.83	708.111	0.216559
Wild Type Peptide GVSEWDPILEELQEM, Peptide Substitution Scan (PEP201752521)	15	12	GDSEWDPILEELQEM	3282	884	0.269348
Wild Type Peptide GVSEWDPILEELQEM, Peptide Substitution Scan (PEP201752521)	15	13	GESEWDPILEELQEM	2750.33	348.222	0.126611
Wild Type Peptide GVSEWDPILEELQEM, Peptide Substitution Scan (PEP201752521)	15	14	GFSEWDPILEELQEM	2249	344.667	0.153253
Wild Type Peptide GVSEWDPILEELQEM, Peptide Substitution Scan (PEP201752521)	15	15	GGSEWDPILEELQEM	1530.5	326.667	0.213438
Wild Type Peptide GVSEWDPILEELQEM, Peptide Substitution Scan (PEP201752521)	15	16	GHSEWDPILEELQEM	1177.83	257.778	0.218858
Wild Type Peptide GVSEWDPILEELQEM, Peptide Substitution Scan (PEP201752521)	15	17	GISEWDPILEELQEM	1881.5	505.667	0.268757
Wild Type Peptide GVSEWDPILEELQEM, Peptide Substitution Scan (PEP201752521)	15	18	GKSEWDPILEELQEM	884.333	133.111	0.150521
Wild Type Peptide GVSEWDPILEELQEM, Peptide Substitution Scan (PEP201752521)	15	19	GLSEWDPILEELQEM	1849.5	369.667	0.199874
Wild Type Peptide GVSEWDPILEELQEM, Peptide Substitution Scan (PEP201752521)	15	20	GMSEWDPILEELQEM	1154.33	344.444	0.298393
Wild Type Peptide GVSEWDPILEELQEM, Peptide Substitution Scan (PEP201752521)	15	21	GNSEWDPILEELQEM	1544.17	186.889	0.121029
Wild Type Peptide GVSEWDPILEELQEM, Peptide Substitution Scan (PEP201752521)	15	22	GPSEWDPILEELQEM	1326.67	209.778	0.158124
Wild Type Peptide GVSEWDPILEELQEM, Peptide Substitution Scan (PEP201752521)	15	23	GQSEWDPILEELQEM	1541.17	317.778	0.206193
Wild Type Peptide GVSEWDPILEELQEM, Peptide Substitution Scan (PEP201752521)	15	24	GRSEWDPILEELQEM	1691.33	347.778	0.205623
Wild Type Peptide GVSEWDPILEELQEM, Peptide Substitution Scan (PEP201752521)	15	25	GSSEWDPILEELQEM	1528.83	229.889	0.150369
Wild Type Peptide GVSEWDPILEELQEM, Peptide Substitution Scan (PEP201752521)	15	26	GTSEWDPILEELQEM	1404.5	278.333	0.198173
Wild Type Peptide GVSEWDPILEELQEM, Peptide Substitution Scan (PEP201752521)	15	28	GWSEWDPILEELQEM	3032	524.333	0.172933
Wild Type Peptide GVSEWDPILEELQEM, Peptide Substitution Scan (PEP201752521)	15	29	GYSEWDPILEELQEM	2284.67	661.222	0.289417
Wild Type Peptide GVSEWDPILEELQEM, Peptide Substitution Scan (PEP201752521)	15	30	GZSEWDPILEELQEM	1309.33	451.556	0.344874
Wild Type Peptide GVSEWDPILEELQEM, Peptide Substitution Scan (PEP201752521)	15	31	GOSEWDPILEELQEM	1060.83	222.556	0.209793
Wild Type Peptide GVSEWDPILEELQEM, Peptide Substitution Scan (PEP201752521)	15	32	GUSEWDPILEELQEM	1113.17	234.222	0.210411
Wild Type Peptide GVSEWDPILEELQEM, Peptide Substitution Scan (PEP201752521)	16	10	AVSEWDPILEELQEM	1666.83	437.778	0.26264
Wild Type Peptide GVSEWDPILEELQEM, Peptide Substitution Scan (PEP201752521)	16	11	CVSEWDPILEELQEM	5779.17	2128.89	0.368373
Wild Type Peptide GVSEWDPILEELQEM, Peptide Substitution Scan (PEP201752521)	16	12	DVSEWDPILEELQEM	3451.67	1018.56	0.295091
Wild Type Peptide GVSEWDPILEELQEM, Peptide Substitution Scan (PEP201752521)	16	13	EVSEWDPILEELQEM	2821.33	871.111	0.308759
Wild Type Peptide GVSEWDPILEELQEM, Peptide Substitution Scan (PEP201752521)	16	14	FVSEWDPILEELQEM	2315	545.333	0.235565
Wild Type Peptide GVSEWDPILEELQEM, Peptide Substitution Scan (PEP201752521)	16	16	HVSEWDPILEELQEM	1591.83	495.444	0.311241
Wild Type Peptide GVSEWDPILEELQEM, Peptide Substitution Scan (PEP201752521)	16	17	IVSEWDPILEELQEM	2158.67	575.556	0.266625
Wild Type Peptide GVSEWDPILEELQEM, Peptide Substitution Scan (PEP201752521)	16	18	KVSEWDPILEELQEM	1405.67	116.889	0.0831555
Wild Type Peptide GVSEWDPILEELQEM, Peptide Substitution Scan (PEP201752521)	16	19	LVSEWDPILEELQEM	2129.17	158.222	0.0743118
Wild Type Peptide GVSEWDPILEELQEM, Peptide Substitution Scan (PEP201752521)	16	20	MVSEWDPILEELQEM	1689.5	321.333	0.190194
Wild Type Peptide GVSEWDPILEELQEM, Peptide Substitution Scan (PEP201752521)	16	21	NVSEWDPILEELQEM	1826.83	322.111	0.176322
Wild Type Peptide GVSEWDPILEELQEM, Peptide Substitution Scan (PEP201752521)	16	22	PVSEWDPILEELQEM	1472.33	125.556	0.0852766
Wild Type Peptide GVSEWDPILEELQEM, Peptide Substitution Scan (PEP201752521)	16	23	QVSEWDPILEELQEM	2287.83	535.444	0.23404
Wild Type Peptide GVSEWDPILEELQEM, Peptide Substitution Scan (PEP201752521)	16	24	RVSEWDPILEELQEM	1778.83	184.556	0.103751
Wild Type Peptide GVSEWDPILEELQEM, Peptide Substitution Scan (PEP201752521)	16	25	SVSEWDPILEELQEM	2245.5	684.333	0.304758
Wild Type Peptide GVSEWDPILEELQEM, Peptide Substitution Scan (PEP201752521)	16	26	TVSEWDPILEELQEM	2001.83	446.889	0.22324
Wild Type Peptide GVSEWDPILEELQEM, Peptide Substitution Scan (PEP201752521)	16	27	VVSEWDPILEELQEM	2249.17	220.111	0.0978634
Wild Type Peptide GVSEWDPILEELQEM, Peptide Substitution Scan (PEP201752521)	16	28	WVSEWDPILEELQEM	4139.83	535.222	0.129286
Wild Type Peptide GVSEWDPILEELQEM, Peptide Substitution Scan (PEP201752521)	16	29	YVSEWDPILEELQEM	3144.5	1027	0.326602
Wild Type Peptide GVSEWDPILEELQEM, Peptide Substitution Scan (PEP201752521)	16	30	ZVSEWDPILEELQEM	2066.17	230.889	0.111747
Wild Type Peptide GVSEWDPILEELQEM, Peptide Substitution Scan (PEP201752521)	16	31	OVSEWDPILEELQEM	1311.83	323.222	0.24639
Wild Type Peptide GVSEWDPILEELQEM, Peptide Substitution Scan (PEP201752521)	16	32	UVSEWDPILEELQEM	2028.67	538.889	0.265637
Control Peptide KPLDFDWEIVLEEQM (PEP201752521)	17	10	KPLDFDWEIVLEEQM	36407	10677.1	0.293271
G Spacer (PEP201752521)	17	11	G	60.6857	61.1869	1.00826
Wild Type Peptide GVSEWDPILEELQEM, Deletion Series (PEP201752521)	18	34	GVSEWDPILEELQEM	1347.5	353.059	0.26201
Wild Type Peptide GVSEWDPILEELQEM, Deletion Series (PEP201752521)	18	35	GVSEWDPILEELQE	3984	302.667	0.0759705
Wild Type Peptide GVSEWDPILEELQEM, Deletion Series (PEP201752521)	18	36	GVSEWDPILEELQ	3675	673.333	0.18322
Wild Type Peptide GVSEWDPILEELQEM, Deletion Series (PEP201752521)	18	37	GVSEWDPILEEL	5096.83	323.889	0.0635471
Wild Type Peptide GVSEWDPILEELQEM, Deletion Series (PEP201752521)	18	38	GVSEWDPILEE	5726.67	509.778	0.0890182
Wild Type Peptide GVSEWDPILEELQEM, Deletion Series (PEP201752521)	18	39	GVSEWDPILE	2357.33	381.222	0.161718
Wild Type Peptide GVSEWDPILEELQEM, Deletion Series (PEP201752521)	18	40	GVSEWDPIL	662.167	162.778	0.245826
Wild Type Peptide GVSEWDPILEELQEM, Deletion Series (PEP201752521)	18	41	GVSEWDPI	623.5	135	0.21652
Wild Type Peptide GVSEWDPILEELQEM, Deletion Series (PEP201752521)	18	42	GVSEWDP	878.667	69.5556	0.0791603
Wild Type Peptide GVSEWDPILEELQEM, Deletion Series (PEP201752521)	18	43	GVSEWD	1245.67	42.2222	0.0338953
Wild Type Peptide GVSEWDPILEELQEM, Deletion Series (PEP201752521)	18	44	GVSEW	3.33333	4.44444	1.33333
Wild Type Peptide GVSEWDPILEELQEM, Deletion Series (PEP201752521)	18	45	GVSE	0	0	0
Wild Type Peptide GVSEWDPILEELQEM, Deletion Series (PEP201752521)	18	46	GVS	0	0	0
Wild Type Peptide GVSEWDPILEELQEM, Deletion Series (PEP201752521)	18	47	GV	0	0	0
Wild Type Peptide GVSEWDPILEELQEM, Deletion Series (PEP201752521)	18	50	VSEWDPILEELQEM	2089.5	254	0.12156
Wild Type Peptide GVSEWDPILEELQEM, Deletion Series (PEP201752521)	18	51	SEWDPILEELQEM	1483.17	119.444	0.0805334
Wild Type Peptide GVSEWDPILEELQEM, Deletion Series (PEP201752521)	18	52	EWDPILEELQEM	2214	230.667	0.104185
Wild Type Peptide GVSEWDPILEELQEM, Deletion Series (PEP201752521)	18	53	WDPILEELQEM	918.333	149.778	0.163097
Wild Type Peptide GVSEWDPILEELQEM, Deletion Series (PEP201752521)	18	54	DPILEELQEM	306.333	42.2222	0.137831
Wild Type Peptide GVSEWDPILEELQEM, Deletion Series (PEP201752521)	18	55	PILEELQEM	180.667	30.8889	0.170972
Wild Type Peptide GVSEWDPILEELQEM, Deletion Series (PEP201752521)	18	56	ILEELQEM	200.667	5.77778	0.0287929
Wild Type Peptide GVSEWDPILEELQEM, Deletion Series (PEP201752521)	18	57	LEELQEM	188.333	27.5556	0.146313
Wild Type Peptide GVSEWDPILEELQEM, Deletion Series (PEP201752521)	18	58	EELQEM	221.333	20.2222	0.0913655
Wild Type Peptide GVSEWDPILEELQEM, Deletion Series (PEP201752521)	18	59	ELQEM	21	14	0.666667
Wild Type Peptide GVSEWDPILEELQEM, Deletion Series (PEP201752521)	18	60	LQEM	0	0	0
Wild Type Peptide GVSEWDPILEELQEM, Deletion Series (PEP201752521)	18	61	QEM	0	0	0
Wild Type Peptide GVSEWDPILEELQEM, Deletion Series (PEP201752521)	18	62	EM	0	0	0
Wild Type Peptide GVSEWDPILEELQEM, Deletion Series (PEP201752521)	18	63	M	0	0	0
E Scan of Control Peptide KPLDFDWEIVLEEQM (PEP201752521) (PEP201752521)	22	34	EPLDFDWEIVLEEQM	35864.4	7330.54	0.204396
E Scan of Control Peptide KPLDFDWEIVLEEQM (PEP201752521) (PEP201752521)	22	35	KELDFDWEIVLEEQM	24631.2	2390.56	0.0970541
E Scan of Control Peptide KPLDFDWEIVLEEQM (PEP201752521) (PEP201752521)	22	36	KPEDFDWEIVLEEQM	25805.5	4370.33	0.169357
E Scan of Control Peptide KPLDFDWEIVLEEQM (PEP201752521) (PEP201752521)	22	37	KPLEFDWEIVLEEQM	22043.2	2141.11	0.0971326
E Scan of Control Peptide KPLDFDWEIVLEEQM (PEP201752521) (PEP201752521)	22	38	KPLDEDWEIVLEEQM	31093.5	1592.67	0.0512219
E Scan of Control Peptide KPLDFDWEIVLEEQM (PEP201752521) (PEP201752521)	22	39	KPLDFEWEIVLEEQM	25003.2	1885.56	0.0754127
E Scan of Control Peptide KPLDFDWEIVLEEQM (PEP201752521) (PEP201752521)	22	40	KPLDFDEEIVLEEQM	961	85.3333	0.0887964
E Scan of Control Peptide KPLDFDWEIVLEEQM (PEP201752521) (PEP201752521)	22	42	KPLDFDWEEVLEEQM	13684.3	1910.22	0.139592
E Scan of Control Peptide KPLDFDWEIVLEEQM (PEP201752521) (PEP201752521)	22	43	KPLDFDWEIELEEQM	11928.7	1459.11	0.12232
E Scan of Control Peptide KPLDFDWEIVLEEQM (PEP201752521) (PEP201752521)	22	44	KPLDFDWEIVEEEQM	24065.8	1347.22	0.0559807
E Scan of Control Peptide KPLDFDWEIVLEEQM (PEP201752521) (PEP201752521)	22	47	KPLDFDWEIVLEEEM	31794.2	2991.56	0.0940913
E Scan of Control Peptide KPLDFDWEIVLEEQM (PEP201752521) (PEP201752521)	22	48	KPLDFDWEIVLEEQE	29670.5	2751.33	0.0927296
E Scan of Control Peptide KPLDFDWEIVLEEQM (PEP201752521) (PEP201752521)	22	50	EELDFDWEIVLEEQM	35684.9	3312.26	0.0928196
E Scan of Control Peptide KPLDFDWEIVLEEQM (PEP201752521) (PEP201752521)	22	51	EPEDFDWEIVLEEQM	38449.3	4149.78	0.107928
E Scan of Control Peptide KPLDFDWEIVLEEQM (PEP201752521) (PEP201752521)	22	52	EPLEFDWEIVLEEQM	32808.7	4396.56	0.134006
E Scan of Control Peptide KPLDFDWEIVLEEQM (PEP201752521) (PEP201752521)	22	53	EPLDEDWEIVLEEQM	51356.2	7169.89	0.139611
E Scan of Control Peptide KPLDFDWEIVLEEQM (PEP201752521) (PEP201752521)	22	54	EPLDFEWEIVLEEQM	48851.3	6294.44	0.128849
E Scan of Control Peptide KPLDFDWEIVLEEQM (PEP201752521) (PEP201752521)	22	55	EPLDFDEEIVLEEQM	4493.17	893.111	0.198771
E Scan of Control Peptide KPLDFDWEIVLEEQM (PEP201752521) (PEP201752521)	22	57	EPLDFDWEEVLEEQM	28333.5	3553.67	0.125423
E Scan of Control Peptide KPLDFDWEIVLEEQM (PEP201752521) (PEP201752521)	22	58	EPLDFDWEIELEEQM	25661.3	3257.11	0.126927
E Scan of Control Peptide KPLDFDWEIVLEEQM (PEP201752521) (PEP201752521)	22	59	EPLDFDWEIVEEEQM	50847.5	7509	0.147677
E Scan of Control Peptide KPLDFDWEIVLEEQM (PEP201752521) (PEP201752521)	22	62	EPLDFDWEIVLEEEM	58288	5097.33	0.0874508
E Scan of Control Peptide KPLDFDWEIVLEEQM (PEP201752521) (PEP201752521)	22	63	EPLDFDWEIVLEEQE	53277	5889.33	0.110542
E Scan of Control Peptide KPLDFDWEIVLEEQM (PEP201752521) (PEP201752521)	25	36	EEEDFDWEIVLEEQM	43043	1870	0.0434449
E Scan of Control Peptide KPLDFDWEIVLEEQM (PEP201752521) (PEP201752521)	25	37	EELEFDWEIVLEEQM	35597.8	943.222	0.0264966
E Scan of Control Peptide KPLDFDWEIVLEEQM (PEP201752521) (PEP201752521)	25	38	EELDEDWEIVLEEQM	45639.2	4305.22	0.0943317
E Scan of Control Peptide KPLDFDWEIVLEEQM (PEP201752521) (PEP201752521)	25	39	EELDFEWEIVLEEQM	37965.8	2312.11	0.0608998
E Scan of Control Peptide KPLDFDWEIVLEEQM (PEP201752521) (PEP201752521)	25	40	EELDFDEEIVLEEQM	5075.98	1225.55	0.241441
E Scan of Control Peptide KPLDFDWEIVLEEQM (PEP201752521) (PEP201752521)	25	42	EELDFDWEEVLEEQM	27498.8	2399.44	0.0872562
E Scan of Control Peptide KPLDFDWEIVLEEQM (PEP201752521) (PEP201752521)	25	43	EELDFDWEIELEEQM	24407.7	2108.22	0.0863754
E Scan of Control Peptide KPLDFDWEIVLEEQM (PEP201752521) (PEP201752521)	25	44	EELDFDWEIVEEEQM	41913	1001.33	0.0238908
E Scan of Control Peptide KPLDFDWEIVLEEQM (PEP201752521) (PEP201752521)	25	47	EELDFDWEIVLEEEM	44331.2	4600.56	0.103777
E Scan of Control Peptide KPLDFDWEIVLEEQM (PEP201752521) (PEP201752521)	25	48	EELDFDWEIVLEEQE	50465.8	5534.56	0.109669
E Scan of Control Peptide KPLDFDWEIVLEEQM (PEP201752521) (PEP201752521)	25	51	EEEDFDEEIVLEEQM	5377	450	0.0836898
E Scan of Control Peptide KPLDFDWEIVLEEQM (PEP201752521) (PEP201752521)	25	52	EELEFDEEIVLEEQM	3739.67	450.556	0.12048
E Scan of Control Peptide KPLDFDWEIVLEEQM (PEP201752521) (PEP201752521)	25	53	EELDEDEEIVLEEQM	283	377.333	1.33333
E Scan of Control Peptide KPLDFDWEIVLEEQM (PEP201752521) (PEP201752521)	25	54	EELDFEEEIVLEEQM	4799.67	263.556	0.0549112
E Scan of Control Peptide KPLDFDWEIVLEEQM (PEP201752521) (PEP201752521)	25	57	EELDFDEEEVLEEQM	4025.17	429.778	0.106773
E Scan of Control Peptide KPLDFDWEIVLEEQM (PEP201752521) (PEP201752521)	25	58	EELDFDEEIELEEQM	7397.17	433.222	0.058566
E Scan of Control Peptide KPLDFDWEIVLEEQM (PEP201752521) (PEP201752521)	25	59	EELDFDEEIVEEEQM	5009.33	398.444	0.0795404
E Scan of Control Peptide KPLDFDWEIVLEEQM (PEP201752521) (PEP201752521)	25	62	EELDFDEEIVLEEEM	10821.3	709.474	0.0655627
E Scan of Control Peptide KPLDFDWEIVLEEQM (PEP201752521) (PEP201752521)	25	63	EELDFDEEIVLEEQE	10100.2	952.778	0.0943329
E Scan of Control Peptide KPLDFDWEIVLEEQM (PEP201752521) (PEP201752521)	28	36	EEEDFDEEIVLEEEM	11358.7	486.889	0.042865
E Scan of Control Peptide KPLDFDWEIVLEEQM (PEP201752521) (PEP201752521)	28	37	EELEFDEEIVLEEEM	9052.5	2027.67	0.22399
E Scan of Control Peptide KPLDFDWEIVLEEQM (PEP201752521) (PEP201752521)	28	38	EELDEDEEIVLEEEM	1555.17	41.4444	0.0266495
E Scan of Control Peptide KPLDFDWEIVLEEQM (PEP201752521) (PEP201752521)	28	39	EELDFEEEIVLEEEM	11464.3	1058.89	0.0923638
E Scan of Control Peptide KPLDFDWEIVLEEQM (PEP201752521) (PEP201752521)	28	42	EELDFDEEEVLEEEM	7928	692	0.0872856
E Scan of Control Peptide KPLDFDWEIVLEEQM (PEP201752521) (PEP201752521)	28	43	EELDFDEEIELEEEM	10376.5	363.667	0.0350471
E Scan of Control Peptide KPLDFDWEIVLEEQM (PEP201752521) (PEP201752521)	28	44	EELDFDEEIVEEEEM	7149	496	0.0693803
E Scan of Control Peptide KPLDFDWEIVLEEQM (PEP201752521) (PEP201752521)	28	48	EELDFDEEIVLEEEE	16601.1	2101.56	0.126591
E Scan of Control Peptide KPLDFDWEIVLEEQM (PEP201752521) (PEP201752521)	28	51	EEEDFDEEIVLEEEE	16187.3	1320.22	0.081559
E Scan of Control Peptide KPLDFDWEIVLEEQM (PEP201752521) (PEP201752521)	28	52	EELEFDEEIVLEEEE	13217	1281.33	0.0969459
E Scan of Control Peptide KPLDFDWEIVLEEQM (PEP201752521) (PEP201752521)	28	53	EELDEDEEIVLEEEE	4840	1332	0.275207
E Scan of Control Peptide KPLDFDWEIVLEEQM (PEP201752521) (PEP201752521)	28	54	EELDFEEEIVLEEEE	13819	969.333	0.070145
E Scan of Control Peptide KPLDFDWEIVLEEQM (PEP201752521) (PEP201752521)	28	57	EELDFDEEEVLEEEE	10446.8	1371.44	0.131278
E Scan of Control Peptide KPLDFDWEIVLEEQM (PEP201752521) (PEP201752521)	28	58	EELDFDEEIELEEEE	15982.8	346.111	0.0216552
E Scan of Control Peptide KPLDFDWEIVLEEQM (PEP201752521) (PEP201752521)	28	59	EELDFDEEIVEEEEE	11699.3	820.444	0.0701275

## Sheet: Raw Data
Spot Family	Row	Column	Peptide	Raw Mean	Background Mean	Foreground Mean	Raw Median	Background Median	Foreground Median	Av. Intensity	Deviation	Deviation [%]
Wild Type Peptide GVSEWDPILEELQEM, Peptide Substitution Scan (PEP201752521)	16	10	AVSEWDPILEELQEM	2636.05	1002.33	1633.73	2192	936	1256	1666.83	437.778	0.26264
Wild Type Peptide GVSEWDPILEELQEM, Peptide Substitution Scan (PEP201752521)	32	10	AVSEWDPILEELQEM	3417.55	1197.25	2220.3	3404.5	1081	2323.5
Wild Type Peptide GVSEWDPILEELQEM, Peptide Substitution Scan (PEP201752521)	16	34	AVSEWDPILEELQEM	2472.41	883.75	1588.66	2246	825	1421
Wild Type Peptide GVSEWDPILEELQEM, Peptide Substitution Scan (PEP201752521)	16	11	CVSEWDPILEELQEM	5332.9	1002.33	4330.58	5426.5	936	4490.5	5779.17	2128.89	0.368373
Wild Type Peptide GVSEWDPILEELQEM, Peptide Substitution Scan (PEP201752521)	32	11	CVSEWDPILEELQEM	9840.26	1197.25	8643.01	10053.5	1081	8972.5
Wild Type Peptide GVSEWDPILEELQEM, Peptide Substitution Scan (PEP201752521)	16	35	CVSEWDPILEELQEM	4694.6	883.75	3810.85	4699.5	825	3874.5
Wild Type Peptide GVSEWDPILEELQEM, Deletion Series (PEP201752521)	18	54	DPILEELQEM	1055.87	825.98	229.89	1062	701	361	306.333	42.2222	0.137831
Wild Type Peptide GVSEWDPILEELQEM, Deletion Series (PEP201752521)	19	54	DPILEELQEM	945.44	825.98	119.46	944	701	243
Wild Type Peptide GVSEWDPILEELQEM, Deletion Series (PEP201752521)	20	54	DPILEELQEM	1060.7	825.98	234.72	1016	701	315
Wild Type Peptide GVSEWDPILEELQEM, Peptide Substitution Scan (PEP201752521)	16	12	DVSEWDPILEELQEM	3713.22	1002.33	2710.89	3632.5	936	2696.5	3451.67	1018.56	0.295091
Wild Type Peptide GVSEWDPILEELQEM, Peptide Substitution Scan (PEP201752521)	32	12	DVSEWDPILEELQEM	6823.11	1197.25	5625.87	6060.5	1081	4979.5
Wild Type Peptide GVSEWDPILEELQEM, Peptide Substitution Scan (PEP201752521)	16	36	DVSEWDPILEELQEM	3442.3	883.75	2558.55	3504	825	2679
E Scan of Control Peptide KPLDFDWEIVLEEQM (PEP201752521) (PEP201752521)	28	51	EEEDFDEEIVLEEEE	20303	4923.82	15379.2	21158	3424	17734	16187.3	1320.22	0.081559
E Scan of Control Peptide KPLDFDWEIVLEEQM (PEP201752521) (PEP201752521)	29	51	EEEDFDEEIVLEEEE	16593.7	4923.82	11669.9	17631	3424	14207
E Scan of Control Peptide KPLDFDWEIVLEEQM (PEP201752521) (PEP201752521)	30	51	EEEDFDEEIVLEEEE	19945.1	4923.82	15021.3	20045	3424	16621
E Scan of Control Peptide KPLDFDWEIVLEEQM (PEP201752521) (PEP201752521)	28	36	EEEDFDEEIVLEEEM	16325.2	4923.82	11401.4	15513	3424	12089	11358.7	486.889	0.042865
E Scan of Control Peptide KPLDFDWEIVLEEQM (PEP201752521) (PEP201752521)	29	36	EEEDFDEEIVLEEEM	18059	4923.82	13135.1	14770	3424	11346
E Scan of Control Peptide KPLDFDWEIVLEEQM (PEP201752521) (PEP201752521)	30	36	EEEDFDEEIVLEEEM	13947.3	4923.82	9023.53	14065	3424	10641
E Scan of Control Peptide KPLDFDWEIVLEEQM (PEP201752521) (PEP201752521)	25	51	EEEDFDEEIVLEEQM	8736.35	4923.82	3812.53	8126	3424	4702	5377	450	0.0836898
E Scan of Control Peptide KPLDFDWEIVLEEQM (PEP201752521) (PEP201752521)	26	51	EEEDFDEEIVLEEQM	8790.53	4923.82	3866.71	8815	3424	5391
E Scan of Control Peptide KPLDFDWEIVLEEQM (PEP201752521) (PEP201752521)	27	51	EEEDFDEEIVLEEQM	9495.42	4923.82	4571.61	9462	3424	6038
E Scan of Control Peptide KPLDFDWEIVLEEQM (PEP201752521) (PEP201752521)	25	36	EEEDFDWEIVLEEQM	40754.5	4923.82	35830.7	43676	3424	40252	43043	1870	0.0434449
E Scan of Control Peptide KPLDFDWEIVLEEQM (PEP201752521) (PEP201752521)	26	36	EEEDFDWEIVLEEQM	44910.9	4923.82	39987.1	46453	3424	43029
E Scan of Control Peptide KPLDFDWEIVLEEQM (PEP201752521) (PEP201752521)	27	36	EEEDFDWEIVLEEQM	45289.2	4923.82	40365.4	49272	3424	45848
E Scan of Control Peptide KPLDFDWEIVLEEQM (PEP201752521) (PEP201752521)	28	53	EELDEDEEIVLEEEE	8393.95	4923.82	3470.13	7520	3424	4096	4840	1332	0.275207
E Scan of Control Peptide KPLDFDWEIVLEEQM (PEP201752521) (PEP201752521)	29	53	EELDEDEEIVLEEEE	7515.6	4923.82	2591.78	7010	3424	3586
E Scan of Control Peptide KPLDFDWEIVLEEQM (PEP201752521) (PEP201752521)	30	53	EELDEDEEIVLEEEE	12460.7	4923.82	7536.93	10262	3424	6838
E Scan of Control Peptide KPLDFDWEIVLEEQM (PEP201752521) (PEP201752521)	28	38	EELDEDEEIVLEEEM	6418.9	4923.82	1495.08	5023.5	3424	1599.5	1555.17	41.4444	0.0266495
E Scan of Control Peptide KPLDFDWEIVLEEQM (PEP201752521) (PEP201752521)	29	38	EELDEDEEIVLEEEM	6083.26	4923.82	1159.44	4997	3424	1573
E Scan of Control Peptide KPLDFDWEIVLEEQM (PEP201752521) (PEP201752521)	30	38	EELDEDEEIVLEEEM	5714.45	4923.82	790.64	4917	3424	1493
E Scan of Control Peptide KPLDFDWEIVLEEQM (PEP201752521) (PEP201752521)	25	53	EELDEDEEIVLEEQM	3271.25	4923.82	0	2859.5	3424	0	283	377.333	1.33333
E Scan of Control Peptide KPLDFDWEIVLEEQM (PEP201752521) (PEP201752521)	26	53	EELDEDEEIVLEEQM	3609.77	4923.82	0	3054.5	3424	0
E Scan of Control Peptide KPLDFDWEIVLEEQM (PEP201752521) (PEP201752521)	27	53	EELDEDEEIVLEEQM	4867.4	4923.82	0	4273	3424	849
E Scan of Control Peptide KPLDFDWEIVLEEQM (PEP201752521) (PEP201752521)	25	38	EELDEDWEIVLEEQM	40196.5	4923.82	35272.7	44429	3424	41005	45639.2	4305.22	0.0943317
E Scan of Control Peptide KPLDFDWEIVLEEQM (PEP201752521) (PEP201752521)	26	38	EELDEDWEIVLEEQM	44689.1	4923.82	39765.3	47239.5	3424	43815.5
E Scan of Control Peptide KPLDFDWEIVLEEQM (PEP201752521) (PEP201752521)	27	38	EELDEDWEIVLEEQM	51800.9	4923.82	46877.1	55521	3424	52097
E Scan of Control Peptide KPLDFDWEIVLEEQM (PEP201752521) (PEP201752521)	28	57	EELDFDEEEVLEEEE	17301.2	4923.82	12377.4	15928	3424	12504	10446.8	1371.44	0.131278
E Scan of Control Peptide KPLDFDWEIVLEEQM (PEP201752521) (PEP201752521)	29	57	EELDFDEEEVLEEEE	11713.1	4923.82	6789.33	12213	3424	8789
E Scan of Control Peptide KPLDFDWEIVLEEQM (PEP201752521) (PEP201752521)	30	57	EELDFDEEEVLEEEE	12076.5	4923.82	7152.7	13471.5	3424	10047.5
E Scan of Control Peptide KPLDFDWEIVLEEQM (PEP201752521) (PEP201752521)	28	42	EELDFDEEEVLEEEM	9824.65	4923.82	4900.83	10314	3424	6890	7928	692	0.0872856
E Scan of Control Peptide KPLDFDWEIVLEEQM (PEP201752521) (PEP201752521)	29	42	EELDFDEEEVLEEEM	11830.1	4923.82	6906.29	11693	3424	8269
E Scan of Control Peptide KPLDFDWEIVLEEQM (PEP201752521) (PEP201752521)	30	42	EELDFDEEEVLEEEM	11546.5	4923.82	6622.65	12049	3424	8625
E Scan of Control Peptide KPLDFDWEIVLEEQM (PEP201752521) (PEP201752521)	25	57	EELDFDEEEVLEEQM	7666.16	4923.82	2742.35	7912	3424	4488	4025.17	429.778	0.106773
E Scan of Control Peptide KPLDFDWEIVLEEQM (PEP201752521) (PEP201752521)	26	57	EELDFDEEEVLEEQM	8356.48	4923.82	3432.66	7631	3424	4207
E Scan of Control Peptide KPLDFDWEIVLEEQM (PEP201752521) (PEP201752521)	27	57	EELDFDEEEVLEEQM	6464.73	4923.82	1540.92	6804.5	3424	3380.5
E Scan of Control Peptide KPLDFDWEIVLEEQM (PEP201752521) (PEP201752521)	28	58	EELDFDEEIELEEEE	19091	4923.82	14167.1	19926	3424	16502	15982.8	346.111	0.0216552
E Scan of Control Peptide KPLDFDWEIVLEEQM (PEP201752521) (PEP201752521)	29	58	EELDFDEEIELEEEE	19126.2	4923.82	14202.4	19375	3424	15951
E Scan of Control Peptide KPLDFDWEIVLEEQM (PEP201752521) (PEP201752521)	30	58	EELDFDEEIELEEEE	19259.7	4923.82	14335.9	18919.5	3424	15495.5
E Scan of Control Peptide KPLDFDWEIVLEEQM (PEP201752521) (PEP201752521)	28	43	EELDFDEEIELEEEM	13000.5	4923.82	8076.63	13485	3424	10061	10376.5	363.667	0.0350471
E Scan of Control Peptide KPLDFDWEIVLEEQM (PEP201752521) (PEP201752521)	29	43	EELDFDEEIELEEEM	14210.4	4923.82	9286.61	14346	3424	10922
E Scan of Control Peptide KPLDFDWEIVLEEQM (PEP201752521) (PEP201752521)	30	43	EELDFDEEIELEEEM	13085.1	4923.82	8161.31	13570.5	3424	10146.5
E Scan of Control Peptide KPLDFDWEIVLEEQM (PEP201752521) (PEP201752521)	25	58	EELDFDEEIELEEQM	11036.7	4923.82	6112.9	10552.5	3424	7128.5	7397.17	433.222	0.058566
E Scan of Control Peptide KPLDFDWEIVLEEQM (PEP201752521) (PEP201752521)	26	58	EELDFDEEIELEEQM	11195.4	4923.82	6271.62	11471	3424	8047
E Scan of Control Peptide KPLDFDWEIVLEEQM (PEP201752521) (PEP201752521)	27	58	EELDFDEEIELEEQM	10507.3	4923.82	5583.48	10440	3424	7016
E Scan of Control Peptide KPLDFDWEIVLEEQM (PEP201752521) (PEP201752521)	28	59	EELDFDEEIVEEEEE	15901.4	4923.82	10977.6	16354	3424	12930	11699.3	820.444	0.0701275
E Scan of Control Peptide KPLDFDWEIVLEEQM (PEP201752521) (PEP201752521)	29	59	EELDFDEEIVEEEEE	13673.7	4923.82	8749.85	14295	3424	10871
E Scan of Control Peptide KPLDFDWEIVLEEQM (PEP201752521) (PEP201752521)	30	59	EELDFDEEIVEEEEE	14349	4923.82	9425.21	14721	3424	11297
E Scan of Control Peptide KPLDFDWEIVLEEQM (PEP201752521) (PEP201752521)	28	44	EELDFDEEIVEEEEM	9235.78	4923.82	4311.96	9829	3424	6405	7149	496	0.0693803
E Scan of Control Peptide KPLDFDWEIVLEEQM (PEP201752521) (PEP201752521)	29	44	EELDFDEEIVEEEEM	12888.7	4923.82	7964.91	11272	3424	7848
E Scan of Control Peptide KPLDFDWEIVLEEQM (PEP201752521) (PEP201752521)	30	44	EELDFDEEIVEEEEM	10379.8	4923.82	5456.02	10618	3424	7194
E Scan of Control Peptide KPLDFDWEIVLEEQM (PEP201752521) (PEP201752521)	25	59	EELDFDEEIVEEEQM	8866.73	4923.82	3942.92	9031	3424	5607	5009.33	398.444	0.0795404
E Scan of Control Peptide KPLDFDWEIVLEEQM (PEP201752521) (PEP201752521)	26	59	EELDFDEEIVEEEQM	8187.51	4923.82	3263.69	7897	3424	4473
E Scan of Control Peptide KPLDFDWEIVLEEQM (PEP201752521) (PEP201752521)	27	59	EELDFDEEIVEEEQM	8242.09	4923.82	3318.27	8372	3424	4948
E Scan of Control Peptide KPLDFDWEIVLEEQM (PEP201752521) (PEP201752521)	28	48	EELDFDEEIVLEEEE	24674.3	4923.82	19750.5	23256	3424	19832	16601.1	2101.56	0.126591
E Scan of Control Peptide KPLDFDWEIVLEEQM (PEP201752521) (PEP201752521)	28	49	EELDFDEEIVLEEEE	22209.9	4923.82	17286.1	23546	3424	20122
E Scan of Control Peptide KPLDFDWEIVLEEQM (PEP201752521) (PEP201752521)	28	50	EELDFDEEIVLEEEE	16228.5	4923.82	11304.6	17241	3424	13817
E Scan of Control Peptide KPLDFDWEIVLEEQM (PEP201752521) (PEP201752521)	28	55	EELDFDEEIVLEEEE	19197.1	4923.82	14273.2	19447	3424	16023
E Scan of Control Peptide KPLDFDWEIVLEEQM (PEP201752521) (PEP201752521)	28	56	EELDFDEEIVLEEEE	20143	4923.82	15219.2	19846	3424	16422
E Scan of Control Peptide KPLDFDWEIVLEEQM (PEP201752521) (PEP201752521)	28	60	EELDFDEEIVLEEEE	18281	4923.82	13357.2	18640	3424	15216
E Scan of Control Peptide KPLDFDWEIVLEEQM (PEP201752521) (PEP201752521)	28	61	EELDFDEEIVLEEEE	20608.8	4923.82	15684.9	19796	3424	16372
E Scan of Control Peptide KPLDFDWEIVLEEQM (PEP201752521) (PEP201752521)	28	62	EELDFDEEIVLEEEE	16669.9	4923.82	11746.1	17383.5	3424	13959.5
E Scan of Control Peptide KPLDFDWEIVLEEQM (PEP201752521) (PEP201752521)	28	63	EELDFDEEIVLEEEE	17318.3	4923.82	12394.5	18865	3424	15441
E Scan of Control Peptide KPLDFDWEIVLEEQM (PEP201752521) (PEP201752521)	29	48	EELDFDEEIVLEEEE	21169.5	4923.82	16245.6	21807	3424	18383
E Scan of Control Peptide KPLDFDWEIVLEEQM (PEP201752521) (PEP201752521)	29	49	EELDFDEEIVLEEEE	20705	4923.82	15781.1	21167.5	3424	17743.5
E Scan of Control Peptide KPLDFDWEIVLEEQM (PEP201752521) (PEP201752521)	29	50	EELDFDEEIVLEEEE	20362	4923.82	15438.2	20043	3424	16619
E Scan of Control Peptide KPLDFDWEIVLEEQM (PEP201752521) (PEP201752521)	29	55	EELDFDEEIVLEEEE	17290	4923.82	12366.2	17998	3424	14574
E Scan of Control Peptide KPLDFDWEIVLEEQM (PEP201752521) (PEP201752521)	29	56	EELDFDEEIVLEEEE	17812.6	4923.82	12888.8	17809	3424	14385
E Scan of Control Peptide KPLDFDWEIVLEEQM (PEP201752521) (PEP201752521)	29	60	EELDFDEEIVLEEEE	17934.3	4923.82	13010.5	17700.5	3424	14276.5
E Scan of Control Peptide KPLDFDWEIVLEEQM (PEP201752521) (PEP201752521)	29	61	EELDFDEEIVLEEEE	19039.5	4923.82	14115.7	19824.5	3424	16400.5
E Scan of Control Peptide KPLDFDWEIVLEEQM (PEP201752521) (PEP201752521)	29	62	EELDFDEEIVLEEEE	17204.1	4923.82	12280.3	18815	3424	15391
E Scan of Control Peptide KPLDFDWEIVLEEQM (PEP201752521) (PEP201752521)	29	63	EELDFDEEIVLEEEE	21991.5	4923.82	17067.7	22940	3424	19516
E Scan of Control Peptide KPLDFDWEIVLEEQM (PEP201752521) (PEP201752521)	30	48	EELDFDEEIVLEEEE	22009.2	4923.82	17085.4	23080.5	3424	19656.5
E Scan of Control Peptide KPLDFDWEIVLEEQM (PEP201752521) (PEP201752521)	30	49	EELDFDEEIVLEEEE	20539.1	4923.82	15615.3	22385	3424	18961
E Scan of Control Peptide KPLDFDWEIVLEEQM (PEP201752521) (PEP201752521)	30	50	EELDFDEEIVLEEEE	18875.3	4923.82	13951.5	20064	3424	16640
E Scan of Control Peptide KPLDFDWEIVLEEQM (PEP201752521) (PEP201752521)	30	55	EELDFDEEIVLEEEE	15565.9	4923.82	10642.1	16394.5	3424	12970.5
E Scan of Control Peptide KPLDFDWEIVLEEQM (PEP201752521) (PEP201752521)	30	56	EELDFDEEIVLEEEE	15466	4923.82	10542.2	16041	3424	12617
E Scan of Control Peptide KPLDFDWEIVLEEQM (PEP201752521) (PEP201752521)	30	60	EELDFDEEIVLEEEE	17158.2	4923.82	12234.4	17506	3424	14082
E Scan of Control Peptide KPLDFDWEIVLEEQM (PEP201752521) (PEP201752521)	30	61	EELDFDEEIVLEEEE	18147.3	4923.82	13223.5	18724	3424	15300
E Scan of Control Peptide KPLDFDWEIVLEEQM (PEP201752521) (PEP201752521)	30	62	EELDFDEEIVLEEEE	22478	4923.82	17554.2	23153	3424	19729
E Scan of Control Peptide KPLDFDWEIVLEEQM (PEP201752521) (PEP201752521)	30	63	EELDFDEEIVLEEEE	30080.8	4923.82	25157	27205.5	3424	23781.5
E Scan of Control Peptide KPLDFDWEIVLEEQM (PEP201752521) (PEP201752521)	25	62	EELDFDEEIVLEEEM	14410.3	4923.82	9486.47	14196	3424	10772	10821.3	709.474	0.0655627
E Scan of Control Peptide KPLDFDWEIVLEEQM (PEP201752521) (PEP201752521)	26	62	EELDFDEEIVLEEEM	14027.4	4923.82	9103.58	14586	3424	11162
E Scan of Control Peptide KPLDFDWEIVLEEQM (PEP201752521) (PEP201752521)	27	62	EELDFDEEIVLEEEM	13353.4	4923.82	8429.61	13208	3424	9784
E Scan of Control Peptide KPLDFDWEIVLEEQM (PEP201752521) (PEP201752521)	28	34	EELDFDEEIVLEEEM	15969.1	4923.82	11045.2	14231	3424	10807
E Scan of Control Peptide KPLDFDWEIVLEEQM (PEP201752521) (PEP201752521)	28	35	EELDFDEEIVLEEEM	14586.1	4923.82	9662.33	14359.5	3424	10935.5
E Scan of Control Peptide KPLDFDWEIVLEEQM (PEP201752521) (PEP201752521)	28	40	EELDFDEEIVLEEEM	13527.4	4923.82	8603.58	13826.5	3424	10402.5
E Scan of Control Peptide KPLDFDWEIVLEEQM (PEP201752521) (PEP201752521)	28	41	EELDFDEEIVLEEEM	13436.7	4923.82	8512.87	13793.5	3424	10369.5
E Scan of Control Peptide KPLDFDWEIVLEEQM (PEP201752521) (PEP201752521)	28	45	EELDFDEEIVLEEEM	16731.2	4923.82	11807.4	17305.5	3424	13881.5
E Scan of Control Peptide KPLDFDWEIVLEEQM (PEP201752521) (PEP201752521)	28	46	EELDFDEEIVLEEEM	13996.8	4923.82	9072.99	13874	3424	10450
E Scan of Control Peptide KPLDFDWEIVLEEQM (PEP201752521) (PEP201752521)	28	47	EELDFDEEIVLEEEM	15168	4923.82	10244.2	14051	3424	10627
E Scan of Control Peptide KPLDFDWEIVLEEQM (PEP201752521) (PEP201752521)	29	34	EELDFDEEIVLEEEM	15693.6	4923.82	10769.8	13494	3424	10070
E Scan of Control Peptide KPLDFDWEIVLEEQM (PEP201752521) (PEP201752521)	29	35	EELDFDEEIVLEEEM	12998	4923.82	8074.23	13186.5	3424	9762.5
E Scan of Control Peptide KPLDFDWEIVLEEQM (PEP201752521) (PEP201752521)	29	40	EELDFDEEIVLEEEM	12114.5	4923.82	7190.69	13461	3424	10037
E Scan of Control Peptide KPLDFDWEIVLEEQM (PEP201752521) (PEP201752521)	29	41	EELDFDEEIVLEEEM	14580.4	4923.82	9656.59	14748.5	3424	11324.5
E Scan of Control Peptide KPLDFDWEIVLEEQM (PEP201752521) (PEP201752521)	29	45	EELDFDEEIVLEEEM	13254.9	4923.82	8331.05	13502	3424	10078
E Scan of Control Peptide KPLDFDWEIVLEEQM (PEP201752521) (PEP201752521)	29	46	EELDFDEEIVLEEEM	13829.6	4923.82	8905.78	14476.5	3424	11052.5
E Scan of Control Peptide KPLDFDWEIVLEEQM (PEP201752521) (PEP201752521)	29	47	EELDFDEEIVLEEEM	13186.6	4923.82	8262.82	12517	3424	9093
E Scan of Control Peptide KPLDFDWEIVLEEQM (PEP201752521) (PEP201752521)	30	34	EELDFDEEIVLEEEM	16915.9	4923.82	11992	15125	3424	11701
E Scan of Control Peptide KPLDFDWEIVLEEQM (PEP201752521) (PEP201752521)	30	35	EELDFDEEIVLEEEM	14103.3	4923.82	9179.47	14067.5	3424	10643.5
E Scan of Control Peptide KPLDFDWEIVLEEQM (PEP201752521) (PEP201752521)	30	40	EELDFDEEIVLEEEM	13849.2	4923.82	8925.4	14006	3424	10582
E Scan of Control Peptide KPLDFDWEIVLEEQM (PEP201752521) (PEP201752521)	30	41	EELDFDEEIVLEEEM	14574.8	4923.82	9651	15642	3424	12218
E Scan of Control Peptide KPLDFDWEIVLEEQM (PEP201752521) (PEP201752521)	30	45	EELDFDEEIVLEEEM	13973.8	4923.82	9050	14529	3424	11105
E Scan of Control Peptide KPLDFDWEIVLEEQM (PEP201752521) (PEP201752521)	30	46	EELDFDEEIVLEEEM	13546.6	4923.82	8622.78	13752	3424	10328
E Scan of Control Peptide KPLDFDWEIVLEEQM (PEP201752521) (PEP201752521)	30	47	EELDFDEEIVLEEEM	15358.6	4923.82	10434.8	15949.5	3424	12525.5
E Scan of Control Peptide KPLDFDWEIVLEEQM (PEP201752521) (PEP201752521)	25	63	EELDFDEEIVLEEQE	11993.9	4923.82	7070.13	12095	3424	8671	10100.2	952.778	0.0943329
E Scan of Control Peptide KPLDFDWEIVLEEQM (PEP201752521) (PEP201752521)	26	63	EELDFDEEIVLEEQE	14180.8	4923.82	9256.98	14297.5	3424	10873.5
E Scan of Control Peptide KPLDFDWEIVLEEQM (PEP201752521) (PEP201752521)	27	63	EELDFDEEIVLEEQE	14415.1	4923.82	9491.27	14180	3424	10756
E Scan of Control Peptide KPLDFDWEIVLEEQM (PEP201752521) (PEP201752521)	25	40	EELDFDEEIVLEEQM	6783.02	4923.82	1859.21	6495.5	3424	3071.5	5075.98	1225.55	0.241441
E Scan of Control Peptide KPLDFDWEIVLEEQM (PEP201752521) (PEP201752521)	25	49	EELDFDEEIVLEEQM	7278.57	4923.82	2354.75	7085.5	3424	3661.5
E Scan of Control Peptide KPLDFDWEIVLEEQM (PEP201752521) (PEP201752521)	25	50	EELDFDEEIVLEEQM	7375.9	4923.82	2452.08	7137	3424	3713
E Scan of Control Peptide KPLDFDWEIVLEEQM (PEP201752521) (PEP201752521)	25	55	EELDFDEEIVLEEQM	9070.8	4923.82	4146.98	8739	3424	5315
E Scan of Control Peptide KPLDFDWEIVLEEQM (PEP201752521) (PEP201752521)	25	56	EELDFDEEIVLEEQM	12148.9	4923.82	7225.05	10207	3424	6783
E Scan of Control Peptide KPLDFDWEIVLEEQM (PEP201752521) (PEP201752521)	25	60	EELDFDEEIVLEEQM	6790.67	4923.82	1866.85	6652	3424	3228
E Scan of Control Peptide KPLDFDWEIVLEEQM (PEP201752521) (PEP201752521)	25	61	EELDFDEEIVLEEQM	11373.2	4923.82	6449.39	8827.5	3424	5403.5
E Scan of Control Peptide KPLDFDWEIVLEEQM (PEP201752521) (PEP201752521)	26	40	EELDFDEEIVLEEQM	6567	4923.82	1643.19	6519	3424	3095
E Scan of Control Peptide KPLDFDWEIVLEEQM (PEP201752521) (PEP201752521)	26	49	EELDFDEEIVLEEQM	9290.94	4923.82	4367.13	8893	3424	5469
E Scan of Control Peptide KPLDFDWEIVLEEQM (PEP201752521) (PEP201752521)	26	50	EELDFDEEIVLEEQM	9603.41	4923.82	4679.59	8828.5	3424	5404.5
E Scan of Control Peptide KPLDFDWEIVLEEQM (PEP201752521) (PEP201752521)	26	55	EELDFDEEIVLEEQM	8824.91	4923.82	3901.1	8840	3424	5416
E Scan of Control Peptide KPLDFDWEIVLEEQM (PEP201752521) (PEP201752521)	26	56	EELDFDEEIVLEEQM	7677.66	4923.82	2753.85	7785	3424	4361
E Scan of Control Peptide KPLDFDWEIVLEEQM (PEP201752521) (PEP201752521)	26	60	EELDFDEEIVLEEQM	7739.35	4923.82	2815.54	7536	3424	4112
E Scan of Control Peptide KPLDFDWEIVLEEQM (PEP201752521) (PEP201752521)	26	61	EELDFDEEIVLEEQM	9960.91	4923.82	5037.09	9356	3424	5932
E Scan of Control Peptide KPLDFDWEIVLEEQM (PEP201752521) (PEP201752521)	27	40	EELDFDEEIVLEEQM	6235.27	4923.82	1311.45	6072.5	3424	2648.5
E Scan of Control Peptide KPLDFDWEIVLEEQM (PEP201752521) (PEP201752521)	27	49	EELDFDEEIVLEEQM	11422.7	4923.82	6498.92	11371	3424	7947
E Scan of Control Peptide KPLDFDWEIVLEEQM (PEP201752521) (PEP201752521)	27	50	EELDFDEEIVLEEQM	10848.2	4923.82	5924.35	11020	3424	7596
E Scan of Control Peptide KPLDFDWEIVLEEQM (PEP201752521) (PEP201752521)	27	55	EELDFDEEIVLEEQM	8472.05	4923.82	3548.24	8479	3424	5055
E Scan of Control Peptide KPLDFDWEIVLEEQM (PEP201752521) (PEP201752521)	27	56	EELDFDEEIVLEEQM	10813.1	4923.82	5889.32	10167	3424	6743
E Scan of Control Peptide KPLDFDWEIVLEEQM (PEP201752521) (PEP201752521)	27	60	EELDFDEEIVLEEQM	9222.64	4923.82	4298.82	8370	3424	4946
E Scan of Control Peptide KPLDFDWEIVLEEQM (PEP201752521) (PEP201752521)	27	61	EELDFDEEIVLEEQM	10401.8	4923.82	5477.93	10119	3424	6695
E Scan of Control Peptide KPLDFDWEIVLEEQM (PEP201752521) (PEP201752521)	25	42	EELDFDWEEVLEEQM	31473.5	4923.82	26549.7	34522	3424	31098	27498.8	2399.44	0.0872562
E Scan of Control Peptide KPLDFDWEIVLEEQM (PEP201752521) (PEP201752521)	26	42	EELDFDWEEVLEEQM	27865.7	4923.82	22941.9	29830	3424	26406
E Scan of Control Peptide KPLDFDWEIVLEEQM (PEP201752521) (PEP201752521)	27	42	EELDFDWEEVLEEQM	26388.6	4923.82	21464.8	28416.5	3424	24992.5
E Scan of Control Peptide KPLDFDWEIVLEEQM (PEP201752521) (PEP201752521)	25	43	EELDFDWEIELEEQM	26406.7	4923.82	21482.9	27508	3424	24084	24407.7	2108.22	0.0863754
E Scan of Control Peptide KPLDFDWEIVLEEQM (PEP201752521) (PEP201752521)	26	43	EELDFDWEIELEEQM	22948.5	4923.82	18024.6	24993	3424	21569
E Scan of Control Peptide KPLDFDWEIVLEEQM (PEP201752521) (PEP201752521)	27	43	EELDFDWEIELEEQM	28283.2	4923.82	23359.3	30994	3424	27570
E Scan of Control Peptide KPLDFDWEIVLEEQM (PEP201752521) (PEP201752521)	25	44	EELDFDWEIVEEEQM	41406.8	4923.82	36483	44192	3424	40768	41913	1001.33	0.0238908
E Scan of Control Peptide KPLDFDWEIVLEEQM (PEP201752521) (PEP201752521)	26	44	EELDFDWEIVEEEQM	43151.5	4923.82	38227.7	46839	3424	43415
E Scan of Control Peptide KPLDFDWEIVLEEQM (PEP201752521) (PEP201752521)	27	44	EELDFDWEIVEEEQM	43968	4923.82	39044.2	44980	3424	41556
E Scan of Control Peptide KPLDFDWEIVLEEQM (PEP201752521) (PEP201752521)	25	47	EELDFDWEIVLEEEM	41980.2	4923.82	37056.4	43879	3424	40455	44331.2	4600.56	0.103777
E Scan of Control Peptide KPLDFDWEIVLEEQM (PEP201752521) (PEP201752521)	26	47	EELDFDWEIVLEEEM	41832.9	4923.82	36909.1	44730.5	3424	41306.5
E Scan of Control Peptide KPLDFDWEIVLEEQM (PEP201752521) (PEP201752521)	27	47	EELDFDWEIVLEEEM	51244.1	4923.82	46320.2	54656	3424	51232
E Scan of Control Peptide KPLDFDWEIVLEEQM (PEP201752521) (PEP201752521)	25	48	EELDFDWEIVLEEQE	43384.5	4923.82	38460.7	45588	3424	42164	50465.8	5534.56	0.109669
E Scan of Control Peptide KPLDFDWEIVLEEQM (PEP201752521) (PEP201752521)	26	48	EELDFDWEIVLEEQE	52694.6	4923.82	47770.8	57878.5	3424	54454.5
E Scan of Control Peptide KPLDFDWEIVLEEQM (PEP201752521) (PEP201752521)	27	48	EELDFDWEIVLEEQE	52415.4	4923.82	47491.6	58203	3424	54779
E Scan of Control Peptide KPLDFDWEIVLEEQM (PEP201752521) (PEP201752521)	22	50	EELDFDWEIVLEEQM	43259.7	4923.82	38335.9	46477	3424	43053	35684.9	3312.26	0.0928196
E Scan of Control Peptide KPLDFDWEIVLEEQM (PEP201752521) (PEP201752521)	23	50	EELDFDWEIVLEEQM	37293.3	4923.82	32369.5	39142	3424	35718
E Scan of Control Peptide KPLDFDWEIVLEEQM (PEP201752521) (PEP201752521)	24	50	EELDFDWEIVLEEQM	31411.5	4923.82	26487.7	32904	3424	29480
E Scan of Control Peptide KPLDFDWEIVLEEQM (PEP201752521) (PEP201752521)	25	34	EELDFDWEIVLEEQM	33227.4	4923.82	28303.6	35251	3424	31827
E Scan of Control Peptide KPLDFDWEIVLEEQM (PEP201752521) (PEP201752521)	25	35	EELDFDWEIVLEEQM	35542.6	4923.82	30618.8	38010	3424	34586
E Scan of Control Peptide KPLDFDWEIVLEEQM (PEP201752521) (PEP201752521)	25	41	EELDFDWEIVLEEQM	37449	4923.82	32525.2	40868	3424	37444
E Scan of Control Peptide KPLDFDWEIVLEEQM (PEP201752521) (PEP201752521)	25	45	EELDFDWEIVLEEQM	39014.8	4923.82	34091	42607	3424	39183
E Scan of Control Peptide KPLDFDWEIVLEEQM (PEP201752521) (PEP201752521)	25	46	EELDFDWEIVLEEQM	33411.3	4923.82	28487.5	36210	3424	32786
E Scan of Control Peptide KPLDFDWEIVLEEQM (PEP201752521) (PEP201752521)	26	34	EELDFDWEIVLEEQM	34252.6	4923.82	29328.8	36568.5	3424	33144.5
E Scan of Control Peptide KPLDFDWEIVLEEQM (PEP201752521) (PEP201752521)	26	35	EELDFDWEIVLEEQM	32597.8	4923.82	27674	34491	3424	31067
E Scan of Control Peptide KPLDFDWEIVLEEQM (PEP201752521) (PEP201752521)	26	41	EELDFDWEIVLEEQM	31329.4	4923.82	26405.5	33745	3424	30321
E Scan of Control Peptide KPLDFDWEIVLEEQM (PEP201752521) (PEP201752521)	26	45	EELDFDWEIVLEEQM	37402.1	4923.82	32478.2	40155	3424	36731
E Scan of Control Peptide KPLDFDWEIVLEEQM (PEP201752521) (PEP201752521)	26	46	EELDFDWEIVLEEQM	39221	4923.82	34297.2	41453.5	3424	38029.5
E Scan of Control Peptide KPLDFDWEIVLEEQM (PEP201752521) (PEP201752521)	27	34	EELDFDWEIVLEEQM	32883.2	4923.82	27959.3	35881.5	3424	32457.5
E Scan of Control Peptide KPLDFDWEIVLEEQM (PEP201752521) (PEP201752521)	27	35	EELDFDWEIVLEEQM	39288.8	4923.82	34365	41986.5	3424	38562.5
E Scan of Control Peptide KPLDFDWEIVLEEQM (PEP201752521) (PEP201752521)	27	41	EELDFDWEIVLEEQM	37792.9	4923.82	32869.1	39952.5	3424	36528.5
E Scan of Control Peptide KPLDFDWEIVLEEQM (PEP201752521) (PEP201752521)	27	45	EELDFDWEIVLEEQM	39322.1	4923.82	34398.2	42981	3424	39557
E Scan of Control Peptide KPLDFDWEIVLEEQM (PEP201752521) (PEP201752521)	27	46	EELDFDWEIVLEEQM	43822.1	4923.82	38898.3	45277	3424	41853
E Scan of Control Peptide KPLDFDWEIVLEEQM (PEP201752521) (PEP201752521)	28	54	EELDFEEEIVLEEEE	16653.5	4923.82	11729.7	16947	3424	13523	13819	969.333	0.070145
E Scan of Control Peptide KPLDFDWEIVLEEQM (PEP201752521) (PEP201752521)	29	54	EELDFEEEIVLEEEE	15586	4923.82	10662.1	16085	3424	12661
E Scan of Control Peptide KPLDFDWEIVLEEQM (PEP201752521) (PEP201752521)	30	54	EELDFEEEIVLEEEE	19012.8	4923.82	14088.9	18697	3424	15273
E Scan of Control Peptide KPLDFDWEIVLEEQM (PEP201752521) (PEP201752521)	28	39	EELDFEEEIVLEEEM	13212	4923.82	8288.16	13300	3424	9876	11464.3	1058.89	0.0923638
E Scan of Control Peptide KPLDFDWEIVLEEQM (PEP201752521) (PEP201752521)	29	39	EELDFEEEIVLEEEM	17780.3	4923.82	12856.5	15944	3424	12520
E Scan of Control Peptide KPLDFDWEIVLEEQM (PEP201752521) (PEP201752521)	30	39	EELDFEEEIVLEEEM	15357.7	4923.82	10433.9	15421	3424	11997
E Scan of Control Peptide KPLDFDWEIVLEEQM (PEP201752521) (PEP201752521)	25	54	EELDFEEEIVLEEQM	8861.21	4923.82	3937.39	8619	3424	5195	4799.67	263.556	0.0549112
E Scan of Control Peptide KPLDFDWEIVLEEQM (PEP201752521) (PEP201752521)	26	54	EELDFEEEIVLEEQM	8051.85	4923.82	3128.03	8186	3424	4762
E Scan of Control Peptide KPLDFDWEIVLEEQM (PEP201752521) (PEP201752521)	27	54	EELDFEEEIVLEEQM	7642.3	4923.82	2718.48	7866	3424	4442
E Scan of Control Peptide KPLDFDWEIVLEEQM (PEP201752521) (PEP201752521)	25	39	EELDFEWEIVLEEQM	37585.1	4923.82	32661.3	40199	3424	36775	37965.8	2312.11	0.0608998
E Scan of Control Peptide KPLDFDWEIVLEEQM (PEP201752521) (PEP201752521)	26	39	EELDFEWEIVLEEQM	34437.1	4923.82	29513.3	39112.5	3424	35688.5
E Scan of Control Peptide KPLDFDWEIVLEEQM (PEP201752521) (PEP201752521)	27	39	EELDFEWEIVLEEQM	42785.5	4923.82	37861.6	44858	3424	41434
E Scan of Control Peptide KPLDFDWEIVLEEQM (PEP201752521) (PEP201752521)	28	52	EELEFDEEIVLEEEE	17494.9	4923.82	12571.1	16807	3424	13383	13217	1281.33	0.0969459
E Scan of Control Peptide KPLDFDWEIVLEEQM (PEP201752521) (PEP201752521)	29	52	EELEFDEEIVLEEEE	16021.9	4923.82	11098.1	14719	3424	11295
E Scan of Control Peptide KPLDFDWEIVLEEQM (PEP201752521) (PEP201752521)	30	52	EELEFDEEIVLEEEE	17011.3	4923.82	12087.5	18397	3424	14973
E Scan of Control Peptide KPLDFDWEIVLEEQM (PEP201752521) (PEP201752521)	28	37	EELEFDEEIVLEEEM	14766.3	4923.82	9842.46	15518	3424	12094	9052.5	2027.67	0.22399
E Scan of Control Peptide KPLDFDWEIVLEEQM (PEP201752521) (PEP201752521)	29	37	EELEFDEEIVLEEEM	11203.9	4923.82	6280.1	11708.5	3424	8284.5
E Scan of Control Peptide KPLDFDWEIVLEEQM (PEP201752521) (PEP201752521)	30	37	EELEFDEEIVLEEEM	10147.6	4923.82	5223.78	10203	3424	6779
E Scan of Control Peptide KPLDFDWEIVLEEQM (PEP201752521) (PEP201752521)	25	52	EELEFDEEIVLEEQM	7336.45	4923.82	2412.63	7000.5	3424	3576.5	3739.67	450.556	0.12048
E Scan of Control Peptide KPLDFDWEIVLEEQM (PEP201752521) (PEP201752521)	26	52	EELEFDEEIVLEEQM	8203.22	4923.82	3279.4	7839.5	3424	4415.5
E Scan of Control Peptide KPLDFDWEIVLEEQM (PEP201752521) (PEP201752521)	27	52	EELEFDEEIVLEEQM	7303	4923.82	2379.18	6651	3424	3227
E Scan of Control Peptide KPLDFDWEIVLEEQM (PEP201752521) (PEP201752521)	25	37	EELEFDWEIVLEEQM	35135.1	4923.82	30211.3	37607	3424	34183	35597.8	943.222	0.0264966
E Scan of Control Peptide KPLDFDWEIVLEEQM (PEP201752521) (PEP201752521)	26	37	EELEFDWEIVLEEQM	38911.1	4923.82	33987.3	39106	3424	35682
E Scan of Control Peptide KPLDFDWEIVLEEQM (PEP201752521) (PEP201752521)	27	37	EELEFDWEIVLEEQM	38836.6	4923.82	33912.8	40352.5	3424	36928.5
Wild Type Peptide GVSEWDPILEELQEM, Deletion Series (PEP201752521)	18	58	EELQEM	950.79	825.98	124.81	931	701	230	221.333	20.2222	0.0913655
Wild Type Peptide GVSEWDPILEELQEM, Deletion Series (PEP201752521)	19	58	EELQEM	907.82	825.98	81.84	892	701	191
Wild Type Peptide GVSEWDPILEELQEM, Deletion Series (PEP201752521)	20	58	EELQEM	951.27	825.98	125.29	944	701	243
Wild Type Peptide GVSEWDPILEELQEM, Deletion Series (PEP201752521)	18	59	ELQEM	730.5	825.98	0	725	701	24	21	14	0.666667
Wild Type Peptide GVSEWDPILEELQEM, Deletion Series (PEP201752521)	19	59	ELQEM	684.92	825.98	0	674	701	0
Wild Type Peptide GVSEWDPILEELQEM, Deletion Series (PEP201752521)	20	59	ELQEM	794.47	825.98	0	740	701	39
Wild Type Peptide GVSEWDPILEELQEM, Deletion Series (PEP201752521)	18	62	EM	582.06	825.98	0	577	701	0	0	0	0
Wild Type Peptide GVSEWDPILEELQEM, Deletion Series (PEP201752521)	19	62	EM	577	825.98	0	554	701	0
Wild Type Peptide GVSEWDPILEELQEM, Deletion Series (PEP201752521)	20	62	EM	604.69	825.98	0	597	701	0
E Scan of Control Peptide KPLDFDWEIVLEEQM (PEP201752521) (PEP201752521)	22	51	EPEDFDWEIVLEEQM	43937.5	4923.82	39013.7	48098	3424	44674	38449.3	4149.78	0.107928
E Scan of Control Peptide KPLDFDWEIVLEEQM (PEP201752521) (PEP201752521)	23	51	EPEDFDWEIVLEEQM	37635.6	4923.82	32711.7	38412	3424	34988
E Scan of Control Peptide KPLDFDWEIVLEEQM (PEP201752521) (PEP201752521)	24	51	EPEDFDWEIVLEEQM	35805.4	4923.82	30881.6	39110	3424	35686
E Scan of Control Peptide KPLDFDWEIVLEEQM (PEP201752521) (PEP201752521)	22	53	EPLDEDWEIVLEEQM	54379	4923.82	49455.2	65535	3424	62111	51356.2	7169.89	0.139611
E Scan of Control Peptide KPLDFDWEIVLEEQM (PEP201752521) (PEP201752521)	23	53	EPLDEDWEIVLEEQM	48680.1	4923.82	43756.3	52355	3424	48931
E Scan of Control Peptide KPLDFDWEIVLEEQM (PEP201752521) (PEP201752521)	24	53	EPLDEDWEIVLEEQM	41210.4	4923.82	36286.6	46450.5	3424	43026.5
E Scan of Control Peptide KPLDFDWEIVLEEQM (PEP201752521) (PEP201752521)	22	55	EPLDFDEEIVLEEQM	8952.87	4923.82	4029.06	8800	3424	5376	4493.17	893.111	0.198771
E Scan of Control Peptide KPLDFDWEIVLEEQM (PEP201752521) (PEP201752521)	23	55	EPLDFDEEIVLEEQM	8549.25	4923.82	3625.43	8374	3424	4950
E Scan of Control Peptide KPLDFDWEIVLEEQM (PEP201752521) (PEP201752521)	24	55	EPLDFDEEIVLEEQM	6969.39	4923.82	2045.58	6577.5	3424	3153.5
E Scan of Control Peptide KPLDFDWEIVLEEQM (PEP201752521) (PEP201752521)	22	57	EPLDFDWEEVLEEQM	35269.8	4923.82	30346	37088	3424	33664	28333.5	3553.67	0.125423
E Scan of Control Peptide KPLDFDWEIVLEEQM (PEP201752521) (PEP201752521)	23	57	EPLDFDWEEVLEEQM	28854.7	4923.82	23930.9	30676.5	3424	27252.5
E Scan of Control Peptide KPLDFDWEIVLEEQM (PEP201752521) (PEP201752521)	24	57	EPLDFDWEEVLEEQM	25166.3	4923.82	20242.5	27508	3424	24084
E Scan of Control Peptide KPLDFDWEIVLEEQM (PEP201752521) (PEP201752521)	22	58	EPLDFDWEIELEEQM	32799.4	4923.82	27875.6	33971	3424	30547	25661.3	3257.11	0.126927
E Scan of Control Peptide KPLDFDWEIVLEEQM (PEP201752521) (PEP201752521)	23	58	EPLDFDWEIELEEQM	25567.1	4923.82	20643.3	26692	3424	23268
E Scan of Control Peptide KPLDFDWEIVLEEQM (PEP201752521) (PEP201752521)	24	58	EPLDFDWEIELEEQM	24972.5	4923.82	20048.7	26593	3424	23169
E Scan of Control Peptide KPLDFDWEIVLEEQM (PEP201752521) (PEP201752521)	22	59	EPLDFDWEIVEEEQM	57675.4	4923.82	52751.6	65535	3424	62111	50847.5	7509	0.147677
E Scan of Control Peptide KPLDFDWEIVLEEQM (PEP201752521) (PEP201752521)	23	59	EPLDFDWEIVEEEQM	46031.1	4923.82	41107.3	49828.5	3424	46404.5
E Scan of Control Peptide KPLDFDWEIVLEEQM (PEP201752521) (PEP201752521)	24	59	EPLDFDWEIVEEEQM	44885.5	4923.82	39961.7	47451	3424	44027
E Scan of Control Peptide KPLDFDWEIVLEEQM (PEP201752521) (PEP201752521)	22	62	EPLDFDWEIVLEEEM	60259.6	4923.82	55335.8	65535	3424	62111	58288	5097.33	0.0874508
E Scan of Control Peptide KPLDFDWEIVLEEQM (PEP201752521) (PEP201752521)	23	62	EPLDFDWEIVLEEEM	56949.7	4923.82	52025.9	65535	3424	62111
E Scan of Control Peptide KPLDFDWEIVLEEQM (PEP201752521) (PEP201752521)	24	62	EPLDFDWEIVLEEEM	51951.3	4923.82	47027.5	54066	3424	50642
E Scan of Control Peptide KPLDFDWEIVLEEQM (PEP201752521) (PEP201752521)	22	63	EPLDFDWEIVLEEQE	54187	4923.82	49263.2	65535	3424	62111	53277	5889.33	0.110542
E Scan of Control Peptide KPLDFDWEIVLEEQM (PEP201752521) (PEP201752521)	23	63	EPLDFDWEIVLEEQE	51507.3	4923.82	46583.5	55061	3424	51637
E Scan of Control Peptide KPLDFDWEIVLEEQM (PEP201752521) (PEP201752521)	24	63	EPLDFDWEIVLEEQE	49074.9	4923.82	44151.1	49507	3424	46083
E Scan of Control Peptide KPLDFDWEIVLEEQM (PEP201752521) (PEP201752521)	22	34	EPLDFDWEIVLEEQM	26236.9	4923.82	21313.1	30450	3424	27026	35864.4	7330.54	0.204396
E Scan of Control Peptide KPLDFDWEIVLEEQM (PEP201752521) (PEP201752521)	22	49	EPLDFDWEIVLEEQM	35730	4923.82	30806.2	35098.5	3424	31674.5
E Scan of Control Peptide KPLDFDWEIVLEEQM (PEP201752521) (PEP201752521)	22	56	EPLDFDWEIVLEEQM	52379.2	4923.82	47455.4	57878.5	3424	54454.5
E Scan of Control Peptide KPLDFDWEIVLEEQM (PEP201752521) (PEP201752521)	22	60	EPLDFDWEIVLEEQM	45806.1	4923.82	40882.3	48578	3424	45154
E Scan of Control Peptide KPLDFDWEIVLEEQM (PEP201752521) (PEP201752521)	22	61	EPLDFDWEIVLEEQM	50108	4923.82	45184.2	52434	3424	49010
E Scan of Control Peptide KPLDFDWEIVLEEQM (PEP201752521) (PEP201752521)	23	34	EPLDFDWEIVLEEQM	22768.1	4923.82	17844.3	23896.5	3424	20472.5
E Scan of Control Peptide KPLDFDWEIVLEEQM (PEP201752521) (PEP201752521)	23	49	EPLDFDWEIVLEEQM	32197.5	4923.82	27273.7	34039.5	3424	30615.5
E Scan of Control Peptide KPLDFDWEIVLEEQM (PEP201752521) (PEP201752521)	23	56	EPLDFDWEIVLEEQM	37010.9	4923.82	32087.1	41943	3424	38519
E Scan of Control Peptide KPLDFDWEIVLEEQM (PEP201752521) (PEP201752521)	23	60	EPLDFDWEIVLEEQM	44837.4	4923.82	39913.5	44522	3424	41098
E Scan of Control Peptide KPLDFDWEIVLEEQM (PEP201752521) (PEP201752521)	23	61	EPLDFDWEIVLEEQM	44437.7	4923.82	39513.9	43262	3424	39838
E Scan of Control Peptide KPLDFDWEIVLEEQM (PEP201752521) (PEP201752521)	24	34	EPLDFDWEIVLEEQM	26814.9	4923.82	21891.1	29136	3424	25712
E Scan of Control Peptide KPLDFDWEIVLEEQM (PEP201752521) (PEP201752521)	24	49	EPLDFDWEIVLEEQM	28411.3	4923.82	23487.5	29064	3424	25640
E Scan of Control Peptide KPLDFDWEIVLEEQM (PEP201752521) (PEP201752521)	24	56	EPLDFDWEIVLEEQM	37433.5	4923.82	32509.7	38355.5	3424	34931.5
E Scan of Control Peptide KPLDFDWEIVLEEQM (PEP201752521) (PEP201752521)	24	60	EPLDFDWEIVLEEQM	38309	4923.82	33385.1	40582	3424	37158
E Scan of Control Peptide KPLDFDWEIVLEEQM (PEP201752521) (PEP201752521)	24	61	EPLDFDWEIVLEEQM	38136.2	4923.82	33212.4	40087	3424	36663
E Scan of Control Peptide KPLDFDWEIVLEEQM (PEP201752521) (PEP201752521)	22	54	EPLDFEWEIVLEEQM	52545.5	4923.82	47621.7	61717	3424	58293	48851.3	6294.44	0.128849
E Scan of Control Peptide KPLDFDWEIVLEEQM (PEP201752521) (PEP201752521)	23	54	EPLDFEWEIVLEEQM	48908.2	4923.82	43984.4	50051	3424	46627
E Scan of Control Peptide KPLDFDWEIVLEEQM (PEP201752521) (PEP201752521)	24	54	EPLDFEWEIVLEEQM	44689.4	4923.82	39765.6	45058	3424	41634
E Scan of Control Peptide KPLDFDWEIVLEEQM (PEP201752521) (PEP201752521)	22	52	EPLEFDWEIVLEEQM	38939.2	4923.82	34015.3	42827.5	3424	39403.5	32808.7	4396.56	0.134006
E Scan of Control Peptide KPLDFDWEIVLEEQM (PEP201752521) (PEP201752521)	23	52	EPLEFDWEIVLEEQM	32443.6	4923.82	27519.8	35037.5	3424	31613.5
E Scan of Control Peptide KPLDFDWEIVLEEQM (PEP201752521) (PEP201752521)	24	52	EPLEFDWEIVLEEQM	30597.2	4923.82	25673.4	30833	3424	27409
Wild Type Peptide GVSEWDPILEELQEM, Peptide Substitution Scan (PEP201752521)	16	13	EVSEWDPILEELQEM	3478.32	1002.33	2476	3298	936	2362	2821.33	871.111	0.308759
Wild Type Peptide GVSEWDPILEELQEM, Peptide Substitution Scan (PEP201752521)	32	13	EVSEWDPILEELQEM	5219.77	1197.25	4022.52	5209	1081	4128
Wild Type Peptide GVSEWDPILEELQEM, Peptide Substitution Scan (PEP201752521)	16	37	EVSEWDPILEELQEM	2916.37	883.75	2032.62	2799	825	1974
Wild Type Peptide GVSEWDPILEELQEM, Deletion Series (PEP201752521)	18	52	EWDPILEELQEM	3242.6	825.98	2416.62	3167.5	701	2466.5	2214	230.667	0.104185
Wild Type Peptide GVSEWDPILEELQEM, Deletion Series (PEP201752521)	19	52	EWDPILEELQEM	2615.56	825.98	1789.58	2569	701	1868
Wild Type Peptide GVSEWDPILEELQEM, Deletion Series (PEP201752521)	20	52	EWDPILEELQEM	3182.69	825.98	2356.7	3008.5	701	2307.5
Wild Type Peptide GVSEWDPILEELQEM, Peptide Substitution Scan (PEP201752521)	16	14	FVSEWDPILEELQEM	3539.73	1002.33	2537.41	3545	936	2609	2315	545.333	0.235565
Wild Type Peptide GVSEWDPILEELQEM, Peptide Substitution Scan (PEP201752521)	32	14	FVSEWDPILEELQEM	3890.04	1197.25	2692.79	3920	1081	2839
Wild Type Peptide GVSEWDPILEELQEM, Peptide Substitution Scan (PEP201752521)	16	38	FVSEWDPILEELQEM	2376.15	883.75	1492.4	2322	825	1497
G Spacer (PEP201752521)	17	11	G	1277.58	1651.8	0	842.5	1394	0	60.6857	61.1869	1.00826
G Spacer (PEP201752521)	17	13	G	1305.14	1651.8	0	1055	1394	0
G Spacer (PEP201752521)	17	15	G	1288.85	1651.8	0	1035	1394	0
G Spacer (PEP201752521)	17	17	G	1350.45	1651.8	0	993	1394	0
G Spacer (PEP201752521)	17	56	G	962.82	1022.12	0	819.5	749	70.5
G Spacer (PEP201752521)	17	58	G	1017.64	1022.12	0	831	749	82
G Spacer (PEP201752521)	17	60	G	1286.52	1022.12	264.41	947	749	198
G Spacer (PEP201752521)	17	62	G	954.59	1022.12	0	802	749	53
G Spacer (PEP201752521)	3	33	G	612.24	1915.9	0	476	1451	0
G Spacer (PEP201752521)	5	33	G	978.66	1915.9	0	876	1451	0
G Spacer (PEP201752521)	7	33	G	766.86	1915.9	0	689	1451	0
G Spacer (PEP201752521)	9	33	G	817.19	1915.9	0	713	1451	0
G Spacer (PEP201752521)	25	33	G	1004.37	1836.74	0	869	961	0
G Spacer (PEP201752521)	27	33	G	1597.48	1836.74	0	957	961	0
G Spacer (PEP201752521)	29	33	G	2209.05	1836.74	372.31	1340.5	961	379.5
G Spacer (PEP201752521)	31	33	G	928.04	1836.74	0	617	961	0
G Spacer (PEP201752521)	1	10	G	543.59	425.14	118.46	335	352	0
G Spacer (PEP201752521)	1	12	G	393.38	425.14	0	342	352	0
G Spacer (PEP201752521)	1	14	G	425.92	425.14	0.78	367	352	15
G Spacer (PEP201752521)	1	16	G	404.37	425.14	0	380	352	28
G Spacer (PEP201752521)	1	18	G	477.06	425.14	51.92	402	352	50
G Spacer (PEP201752521)	1	20	G	422.7	425.14	0	393	352	41
G Spacer (PEP201752521)	1	22	G	517.1	425.14	91.96	417	352	65
G Spacer (PEP201752521)	1	24	G	442.31	425.14	17.18	372	352	20
G Spacer (PEP201752521)	1	26	G	413.07	425.14	0	396	352	44
G Spacer (PEP201752521)	1	28	G	584.54	425.14	159.4	462.5	352	110.5
G Spacer (PEP201752521)	1	30	G	522.19	425.14	97.06	491	352	139
G Spacer (PEP201752521)	1	32	G	980.94	425.14	555.8	493	352	141
G Spacer (PEP201752521)	1	34	G	489.01	425.14	63.88	410	352	58
G Spacer (PEP201752521)	1	36	G	489.78	425.14	64.64	394	352	42
G Spacer (PEP201752521)	1	38	G	483.91	425.14	58.77	396	352	44
G Spacer (PEP201752521)	1	40	G	406.66	425.14	0	361	352	9
G Spacer (PEP201752521)	1	42	G	467.01	425.14	41.87	378.5	352	26.5
G Spacer (PEP201752521)	1	44	G	425.08	425.14	0	384	352	32
G Spacer (PEP201752521)	1	46	G	510.58	425.14	85.44	365	352	13
G Spacer (PEP201752521)	1	48	G	390.84	425.14	0	369	352	17
G Spacer (PEP201752521)	1	50	G	374.77	425.14	0	354	352	2
G Spacer (PEP201752521)	1	52	G	463.08	425.14	37.94	329	352	0
G Spacer (PEP201752521)	1	54	G	314.07	425.14	0	300	352	0
G Spacer (PEP201752521)	1	56	G	314.91	425.14	0	304	352	0
G Spacer (PEP201752521)	1	58	G	330.95	425.14	0	335	352	0
G Spacer (PEP201752521)	1	60	G	297.95	425.14	0	290	352	0
G Spacer (PEP201752521)	1	62	G	288.79	425.14	0	287	352	0
G Spacer (PEP201752521)	1	64	G	300.28	425.14	0	300	352	0
G Spacer (PEP201752521)	33	10	G	492.73	488.38	4.35	452	476	0
G Spacer (PEP201752521)	33	12	G	529.75	488.38	41.37	509	476	33
G Spacer (PEP201752521)	33	14	G	622.17	488.38	133.79	564	476	88
G Spacer (PEP201752521)	33	16	G	534.38	488.38	46.01	516	476	40
G Spacer (PEP201752521)	33	18	G	542.09	488.38	53.71	514	476	38
G Spacer (PEP201752521)	33	20	G	719.02	488.38	230.64	707	476	231
G Spacer (PEP201752521)	33	22	G	664.67	488.38	176.3	632	476	156
G Spacer (PEP201752521)	33	24	G	733.03	488.38	244.65	682	476	206
G Spacer (PEP201752521)	33	26	G	631.2	488.38	142.83	613	476	137
G Spacer (PEP201752521)	33	28	G	694.19	488.38	205.81	676	476	200
G Spacer (PEP201752521)	33	30	G	698.06	488.38	209.69	690	476	214
G Spacer (PEP201752521)	33	32	G	684.9	488.38	196.53	674	476	198
G Spacer (PEP201752521)	33	34	G	571.07	488.38	82.7	541	476	65
G Spacer (PEP201752521)	33	36	G	589.88	488.38	101.5	573	476	97
G Spacer (PEP201752521)	33	38	G	567.08	488.38	78.71	528	476	52
G Spacer (PEP201752521)	33	40	G	569.49	488.38	81.12	554	476	78
G Spacer (PEP201752521)	33	42	G	541.93	488.38	53.55	531	476	55
G Spacer (PEP201752521)	33	44	G	526.08	488.38	37.71	506	476	30
G Spacer (PEP201752521)	33	46	G	565.24	488.38	76.87	545	476	69
G Spacer (PEP201752521)	33	48	G	542.64	488.38	54.26	525.5	476	49.5
G Spacer (PEP201752521)	33	50	G	476.24	488.38	0	468	476	0
G Spacer (PEP201752521)	33	52	G	526.16	488.38	37.78	522	476	46
G Spacer (PEP201752521)	33	54	G	707.83	488.38	219.46	581	476	105
G Spacer (PEP201752521)	33	56	G	525.03	488.38	36.65	514	476	38
G Spacer (PEP201752521)	33	58	G	761.88	488.38	273.51	566	476	90
G Spacer (PEP201752521)	33	60	G	524.86	488.38	36.48	508	476	32
G Spacer (PEP201752521)	33	62	G	593.17	488.38	104.79	539	476	63
G Spacer (PEP201752521)	33	64	G	508.18	488.38	19.81	487	476	11
G Spacer (PEP201752521)	3	9	G	357.38	553.17	0	354	501	0
G Spacer (PEP201752521)	5	9	G	393.37	553.17	0	371	501	0
G Spacer (PEP201752521)	7	9	G	431.93	553.17	0	382	501	0
G Spacer (PEP201752521)	9	9	G	433.71	553.17	0	403	501	0
G Spacer (PEP201752521)	11	9	G	401.2	553.17	0	386	501	0
G Spacer (PEP201752521)	13	9	G	527.08	553.17	0	503	501	2
G Spacer (PEP201752521)	15	9	G	657.73	553.17	104.56	590.5	501	89.5
G Spacer (PEP201752521)	17	9	G	1822.58	553.17	1269.41	1278	501	777
G Spacer (PEP201752521)	19	9	G	426.46	553.17	0	405	501	0
G Spacer (PEP201752521)	21	9	G	589.7	553.17	36.53	567.5	501	66.5
G Spacer (PEP201752521)	23	9	G	579.97	553.17	26.8	537	501	36
G Spacer (PEP201752521)	25	9	G	655.31	553.17	102.14	610.5	501	109.5
G Spacer (PEP201752521)	27	9	G	596.32	553.17	43.15	583	501	82
G Spacer (PEP201752521)	29	9	G	661.04	553.17	107.87	611	501	110
G Spacer (PEP201752521)	31	9	G	662.29	553.17	109.12	579	501	78
G Spacer (PEP201752521)	3	64	G	278.25	439.75	0	276	405	0
G Spacer (PEP201752521)	5	64	G	274.69	439.75	0	272	405	0
G Spacer (PEP201752521)	7	64	G	254.91	439.75	0	254	405	0
G Spacer (PEP201752521)	9	64	G	281.94	439.75	0	285	405	0
G Spacer (PEP201752521)	11	64	G	339.68	439.75	0	339	405	0
G Spacer (PEP201752521)	13	64	G	362.98	439.75	0	359	405	0
G Spacer (PEP201752521)	15	64	G	370.87	439.75	0	356	405	0
G Spacer (PEP201752521)	17	64	G	553.28	439.75	113.53	497	405	92
G Spacer (PEP201752521)	19	64	G	393.13	439.75	0	368	405	0
G Spacer (PEP201752521)	21	64	G	447.48	439.75	7.73	423	405	18
G Spacer (PEP201752521)	23	64	G	570.14	439.75	130.39	554	405	149
G Spacer (PEP201752521)	25	64	G	638.53	439.75	198.78	587	405	182
G Spacer (PEP201752521)	27	64	G	595.86	439.75	156.11	532	405	127
G Spacer (PEP201752521)	29	64	G	687.13	439.75	247.38	663	405	258
G Spacer (PEP201752521)	31	64	G	505.06	439.75	65.31	499	405	94
G Spacer (PEP201752521)	18	48	G	471.11	825.98	0	457	701	0
G Spacer (PEP201752521)	19	48	G	497.13	825.98	0	482	701	0
G Spacer (PEP201752521)	20	48	G	542.03	825.98	0	527	701	0
Wild Type Peptide GVSEWDPILEELQEM, Peptide Substitution Scan (PEP201752521)	15	10	GASEWDPILEELQEM	2205.15	1002.33	1202.82	2177	936	1241	1376.5	339.667	0.246761
Wild Type Peptide GVSEWDPILEELQEM, Peptide Substitution Scan (PEP201752521)	31	10	GASEWDPILEELQEM	3092.35	1197.25	1895.11	2967	1081	1886
Wild Type Peptide GVSEWDPILEELQEM, Peptide Substitution Scan (PEP201752521)	15	34	GASEWDPILEELQEM	1832.89	883.75	949.14	1827.5	825	1002.5
Wild Type Peptide GVSEWDPILEELQEM, Peptide Substitution Scan (PEP201752521)	15	11	GCSEWDPILEELQEM	4221.12	1002.33	3218.79	4124.5	936	3188.5	3269.83	708.111	0.216559
Wild Type Peptide GVSEWDPILEELQEM, Peptide Substitution Scan (PEP201752521)	31	11	GCSEWDPILEELQEM	5108.14	1197.25	3910.89	5413	1081	4332
Wild Type Peptide GVSEWDPILEELQEM, Peptide Substitution Scan (PEP201752521)	15	35	GCSEWDPILEELQEM	3098.44	883.75	2214.7	3114	825	2289
Wild Type Peptide GVSEWDPILEELQEM, Peptide Substitution Scan (PEP201752521)	15	12	GDSEWDPILEELQEM	3734.41	1002.33	2732.09	3731	936	2795	3282	884	0.269348
Wild Type Peptide GVSEWDPILEELQEM, Peptide Substitution Scan (PEP201752521)	31	12	GDSEWDPILEELQEM	5879.82	1197.25	4682.58	5689	1081	4608
Wild Type Peptide GVSEWDPILEELQEM, Peptide Substitution Scan (PEP201752521)	15	36	GDSEWDPILEELQEM	3284.03	883.75	2400.28	3268	825	2443
Wild Type Peptide GVSEWDPILEELQEM, Peptide Substitution Scan (PEP201752521)	15	13	GESEWDPILEELQEM	3710.6	1002.33	2708.27	3689	936	2753	2750.33	348.222	0.126611
Wild Type Peptide GVSEWDPILEELQEM, Peptide Substitution Scan (PEP201752521)	31	13	GESEWDPILEELQEM	4337.27	1197.25	3140.02	4351	1081	3270
Wild Type Peptide GVSEWDPILEELQEM, Peptide Substitution Scan (PEP201752521)	15	37	GESEWDPILEELQEM	2934.84	883.75	2051.09	3053	825	2228
Wild Type Peptide GVSEWDPILEELQEM, Peptide Substitution Scan (PEP201752521)	15	14	GFSEWDPILEELQEM	3244.12	1002.33	2241.79	3200	936	2264	2249	344.667	0.153253
Wild Type Peptide GVSEWDPILEELQEM, Peptide Substitution Scan (PEP201752521)	31	14	GFSEWDPILEELQEM	3668.86	1197.25	2471.61	3832	1081	2751
Wild Type Peptide GVSEWDPILEELQEM, Peptide Substitution Scan (PEP201752521)	15	38	GFSEWDPILEELQEM	2543.92	883.75	1660.17	2557	825	1732
Wild Type Peptide GVSEWDPILEELQEM, Peptide Substitution Scan (PEP201752521)	15	15	GGSEWDPILEELQEM	2603.87	1002.33	1601.54	2698	936	1762	1530.5	326.667	0.213438
Wild Type Peptide GVSEWDPILEELQEM, Peptide Substitution Scan (PEP201752521)	31	15	GGSEWDPILEELQEM	2877.75	1197.25	1680.5	2870	1081	1789
Wild Type Peptide GVSEWDPILEELQEM, Peptide Substitution Scan (PEP201752521)	15	39	GGSEWDPILEELQEM	1893.16	883.75	1009.41	1865.5	825	1040.5
Wild Type Peptide GVSEWDPILEELQEM, Peptide Substitution Scan (PEP201752521)	15	16	GHSEWDPILEELQEM	1998.24	1002.33	995.92	1925	936	989	1177.83	257.778	0.218858
Wild Type Peptide GVSEWDPILEELQEM, Peptide Substitution Scan (PEP201752521)	31	16	GHSEWDPILEELQEM	2602.92	1197.25	1405.67	2645.5	1081	1564.5
Wild Type Peptide GVSEWDPILEELQEM, Peptide Substitution Scan (PEP201752521)	15	40	GHSEWDPILEELQEM	1822.27	883.75	938.52	1805	825	980
Wild Type Peptide GVSEWDPILEELQEM, Peptide Substitution Scan (PEP201752521)	15	17	GISEWDPILEELQEM	2816.04	1002.33	1813.71	2771	936	1835	1881.5	505.667	0.268757
Wild Type Peptide GVSEWDPILEELQEM, Peptide Substitution Scan (PEP201752521)	31	17	GISEWDPILEELQEM	3581.5	1197.25	2384.25	3721	1081	2640
Wild Type Peptide GVSEWDPILEELQEM, Peptide Substitution Scan (PEP201752521)	15	41	GISEWDPILEELQEM	2001.45	883.75	1117.7	1994.5	825	1169.5
Wild Type Peptide GVSEWDPILEELQEM, Peptide Substitution Scan (PEP201752521)	15	30	GZSEWDPILEELQEM	1683.03	1002.33	680.7	1568	936	632	1309.33	451.556	0.344874
Wild Type Peptide GVSEWDPILEELQEM, Peptide Substitution Scan (PEP201752521)	31	30	GZSEWDPILEELQEM	2582.68	1197.25	1385.43	2561	1081	1480
Wild Type Peptide GVSEWDPILEELQEM, Peptide Substitution Scan (PEP201752521)	15	54	GZSEWDPILEELQEM	2653.63	883.75	1769.88	2641	825	1816
Wild Type Peptide GVSEWDPILEELQEM, Peptide Substitution Scan (PEP201752521)	15	18	GKSEWDPILEELQEM	1763.04	1002.33	760.71	1738	936	802	884.333	133.111	0.150521
Wild Type Peptide GVSEWDPILEELQEM, Peptide Substitution Scan (PEP201752521)	31	18	GKSEWDPILEELQEM	2183.03	1197.25	985.78	2165	1081	1084
Wild Type Peptide GVSEWDPILEELQEM, Peptide Substitution Scan (PEP201752521)	15	42	GKSEWDPILEELQEM	1638.81	883.75	755.06	1592	825	767
Wild Type Peptide GVSEWDPILEELQEM, Peptide Substitution Scan (PEP201752521)	15	19	GLSEWDPILEELQEM	2439.31	1002.33	1436.98	2497.5	936	1561.5	1849.5	369.667	0.199874
Wild Type Peptide GVSEWDPILEELQEM, Peptide Substitution Scan (PEP201752521)	31	19	GLSEWDPILEELQEM	3597.69	1197.25	2400.44	3485	1081	2404
Wild Type Peptide GVSEWDPILEELQEM, Peptide Substitution Scan (PEP201752521)	15	43	GLSEWDPILEELQEM	2484.21	883.75	1600.46	2408	825	1583
Wild Type Peptide GVSEWDPILEELQEM, Peptide Substitution Scan (PEP201752521)	15	20	GMSEWDPILEELQEM	1933.01	1002.33	930.68	1924	936	988	1154.33	344.444	0.298393
Wild Type Peptide GVSEWDPILEELQEM, Peptide Substitution Scan (PEP201752521)	31	20	GMSEWDPILEELQEM	2742.5	1197.25	1545.26	2752	1081	1671
Wild Type Peptide GVSEWDPILEELQEM, Peptide Substitution Scan (PEP201752521)	15	44	GMSEWDPILEELQEM	1584.7	883.75	700.95	1629	825	804
Wild Type Peptide GVSEWDPILEELQEM, Peptide Substitution Scan (PEP201752521)	15	21	GNSEWDPILEELQEM	2322.08	1002.33	1319.75	2276	936	1340	1544.17	186.889	0.121029
Wild Type Peptide GVSEWDPILEELQEM, Peptide Substitution Scan (PEP201752521)	31	21	GNSEWDPILEELQEM	3009.86	1197.25	1812.61	2905.5	1081	1824.5
Wild Type Peptide GVSEWDPILEELQEM, Peptide Substitution Scan (PEP201752521)	15	45	GNSEWDPILEELQEM	2213.62	883.75	1329.87	2293	825	1468
Wild Type Peptide GVSEWDPILEELQEM, Peptide Substitution Scan (PEP201752521)	15	31	GOSEWDPILEELQEM	1693.13	1002.33	690.8	1663	936	727	1060.83	222.556	0.209793
Wild Type Peptide GVSEWDPILEELQEM, Peptide Substitution Scan (PEP201752521)	31	31	GOSEWDPILEELQEM	2352.85	1197.25	1155.61	2408	1081	1327
Wild Type Peptide GVSEWDPILEELQEM, Peptide Substitution Scan (PEP201752521)	15	55	GOSEWDPILEELQEM	1904.8	883.75	1021.05	1953.5	825	1128.5
Wild Type Peptide GVSEWDPILEELQEM, Peptide Substitution Scan (PEP201752521)	15	22	GPSEWDPILEELQEM	1863.1	1002.33	860.78	1948	936	1012	1326.67	209.778	0.158124
Wild Type Peptide GVSEWDPILEELQEM, Peptide Substitution Scan (PEP201752521)	31	22	GPSEWDPILEELQEM	2713.69	1197.25	1516.45	2597	1081	1516
Wild Type Peptide GVSEWDPILEELQEM, Peptide Substitution Scan (PEP201752521)	15	46	GPSEWDPILEELQEM	2276.6	883.75	1392.86	2277	825	1452
Wild Type Peptide GVSEWDPILEELQEM, Peptide Substitution Scan (PEP201752521)	15	23	GQSEWDPILEELQEM	2084.05	1002.33	1081.72	2000.5	936	1064.5	1541.17	317.778	0.206193
Wild Type Peptide GVSEWDPILEELQEM, Peptide Substitution Scan (PEP201752521)	31	23	GQSEWDPILEELQEM	3067.91	1197.25	1870.66	3067	1081	1986
Wild Type Peptide GVSEWDPILEELQEM, Peptide Substitution Scan (PEP201752521)	15	47	GQSEWDPILEELQEM	2400.37	883.75	1516.62	2398	825	1573
Wild Type Peptide GVSEWDPILEELQEM, Peptide Substitution Scan (PEP201752521)	15	24	GRSEWDPILEELQEM	2094.97	1002.33	1092.64	2125.5	936	1189.5	1691.33	347.778	0.205623
Wild Type Peptide GVSEWDPILEELQEM, Peptide Substitution Scan (PEP201752521)	31	24	GRSEWDPILEELQEM	3450.06	1197.25	2252.81	3294	1081	2213
Wild Type Peptide GVSEWDPILEELQEM, Peptide Substitution Scan (PEP201752521)	15	48	GRSEWDPILEELQEM	2519.98	883.75	1636.23	2496.5	825	1671.5
Wild Type Peptide GVSEWDPILEELQEM, Peptide Substitution Scan (PEP201752521)	15	25	GSSEWDPILEELQEM	2179.63	1002.33	1177.3	2120	936	1184	1528.83	229.889	0.150369
Wild Type Peptide GVSEWDPILEELQEM, Peptide Substitution Scan (PEP201752521)	31	25	GSSEWDPILEELQEM	2656.67	1197.25	1459.42	2637	1081	1556
Wild Type Peptide GVSEWDPILEELQEM, Peptide Substitution Scan (PEP201752521)	15	49	GSSEWDPILEELQEM	2806.89	883.75	1923.15	2671.5	825	1846.5
Wild Type Peptide GVSEWDPILEELQEM, Peptide Substitution Scan (PEP201752521)	15	26	GTSEWDPILEELQEM	1945.12	1002.33	942.8	1929	936	993	1404.5	278.333	0.198173
Wild Type Peptide GVSEWDPILEELQEM, Peptide Substitution Scan (PEP201752521)	31	26	GTSEWDPILEELQEM	2645.36	1197.25	1448.11	2479.5	1081	1398.5
Wild Type Peptide GVSEWDPILEELQEM, Peptide Substitution Scan (PEP201752521)	15	50	GTSEWDPILEELQEM	2584.39	883.75	1700.64	2647	825	1822
Wild Type Peptide GVSEWDPILEELQEM, Peptide Substitution Scan (PEP201752521)	15	32	GUSEWDPILEELQEM	1708.8	1002.33	706.47	1719	936	783	1113.17	234.222	0.210411
Wild Type Peptide GVSEWDPILEELQEM, Peptide Substitution Scan (PEP201752521)	31	32	GUSEWDPILEELQEM	2219.03	1197.25	1021.78	2173	1081	1092
Wild Type Peptide GVSEWDPILEELQEM, Peptide Substitution Scan (PEP201752521)	15	56	GUSEWDPILEELQEM	2312.13	883.75	1428.38	2289.5	825	1464.5
Wild Type Peptide GVSEWDPILEELQEM, Deletion Series (PEP201752521)	18	47	GV	415.15	825.98	0	409	701	0	0	0	0
Wild Type Peptide GVSEWDPILEELQEM, Deletion Series (PEP201752521)	19	47	GV	438.47	825.98	0	433	701	0
Wild Type Peptide GVSEWDPILEELQEM, Deletion Series (PEP201752521)	20	47	GV	426.3	825.98	0	417	701	0
Wild Type Peptide GVSEWDPILEELQEM, Peptide Substitution Scan (PEP201752521)	14	10	GVAEWDPILEELQEM	2358.95	1002.33	1356.62	2326	936	1390	1398	436	0.311874
Wild Type Peptide GVSEWDPILEELQEM, Peptide Substitution Scan (PEP201752521)	30	10	GVAEWDPILEELQEM	3137.96	1197.25	1940.71	3133	1081	2052
Wild Type Peptide GVSEWDPILEELQEM, Peptide Substitution Scan (PEP201752521)	14	34	GVAEWDPILEELQEM	1543.59	883.75	659.85	1577	825	752
Wild Type Peptide GVSEWDPILEELQEM, Peptide Substitution Scan (PEP201752521)	14	11	GVCEWDPILEELQEM	4022.26	1002.33	3019.93	4073	936	3137	3236	655.333	0.202513
Wild Type Peptide GVSEWDPILEELQEM, Peptide Substitution Scan (PEP201752521)	30	11	GVCEWDPILEELQEM	5199.5	1197.25	4002.25	5300	1081	4219
Wild Type Peptide GVSEWDPILEELQEM, Peptide Substitution Scan (PEP201752521)	14	35	GVCEWDPILEELQEM	3051.14	883.75	2167.39	3177	825	2352
Wild Type Peptide GVSEWDPILEELQEM, Peptide Substitution Scan (PEP201752521)	14	12	GVDEWDPILEELQEM	4658.3	1002.33	3655.98	4746	936	3810	4296.67	1052.89	0.245048
Wild Type Peptide GVSEWDPILEELQEM, Peptide Substitution Scan (PEP201752521)	30	12	GVDEWDPILEELQEM	7432.98	1197.25	6235.74	6957	1081	5876
Wild Type Peptide GVSEWDPILEELQEM, Peptide Substitution Scan (PEP201752521)	14	36	GVDEWDPILEELQEM	3927.56	883.75	3043.81	4029	825	3204
Wild Type Peptide GVSEWDPILEELQEM, Peptide Substitution Scan (PEP201752521)	14	13	GVEEWDPILEELQEM	4440.24	1002.33	3437.91	4598.5	936	3662.5	4148.5	1183.67	0.285324
Wild Type Peptide GVSEWDPILEELQEM, Peptide Substitution Scan (PEP201752521)	30	13	GVEEWDPILEELQEM	6334.67	1197.25	5137.42	7005	1081	5924
Wild Type Peptide GVSEWDPILEELQEM, Peptide Substitution Scan (PEP201752521)	14	37	GVEEWDPILEELQEM	3765.13	883.75	2881.38	3684	825	2859
Wild Type Peptide GVSEWDPILEELQEM, Peptide Substitution Scan (PEP201752521)	14	14	GVFEWDPILEELQEM	2801.53	1002.33	1799.2	2805	936	1869	2110.67	630.222	0.298589
Wild Type Peptide GVSEWDPILEELQEM, Peptide Substitution Scan (PEP201752521)	30	14	GVFEWDPILEELQEM	3970.11	1197.25	2772.86	4137	1081	3056
Wild Type Peptide GVSEWDPILEELQEM, Peptide Substitution Scan (PEP201752521)	14	38	GVFEWDPILEELQEM	2446.49	883.75	1562.74	2232	825	1407
Wild Type Peptide GVSEWDPILEELQEM, Peptide Substitution Scan (PEP201752521)	14	15	GVGEWDPILEELQEM	2308.32	1002.33	1306	2261	936	1325	1429.33	255.111	0.178483
Wild Type Peptide GVSEWDPILEELQEM, Peptide Substitution Scan (PEP201752521)	30	15	GVGEWDPILEELQEM	2896.7	1197.25	1699.46	2893	1081	1812
Wild Type Peptide GVSEWDPILEELQEM, Peptide Substitution Scan (PEP201752521)	14	39	GVGEWDPILEELQEM	1965.32	883.75	1081.57	1976	825	1151
Wild Type Peptide GVSEWDPILEELQEM, Peptide Substitution Scan (PEP201752521)	14	16	GVHEWDPILEELQEM	2178.91	1002.33	1176.58	2022	936	1086	1113	281.333	0.25277
Wild Type Peptide GVSEWDPILEELQEM, Peptide Substitution Scan (PEP201752521)	30	16	GVHEWDPILEELQEM	2616.36	1197.25	1419.11	2616	1081	1535
Wild Type Peptide GVSEWDPILEELQEM, Peptide Substitution Scan (PEP201752521)	14	40	GVHEWDPILEELQEM	1488.03	883.75	604.28	1543	825	718
Wild Type Peptide GVSEWDPILEELQEM, Peptide Substitution Scan (PEP201752521)	14	17	GVIEWDPILEELQEM	2464.69	1002.33	1462.36	2419.5	936	1483.5	1894	348.667	0.18409
Wild Type Peptide GVSEWDPILEELQEM, Peptide Substitution Scan (PEP201752521)	30	17	GVIEWDPILEELQEM	3536.46	1197.25	2339.21	3498	1081	2417
Wild Type Peptide GVSEWDPILEELQEM, Peptide Substitution Scan (PEP201752521)	14	41	GVIEWDPILEELQEM	2516.45	883.75	1632.7	2606.5	825	1781.5
Wild Type Peptide GVSEWDPILEELQEM, Peptide Substitution Scan (PEP201752521)	14	30	GVZEWDPILEELQEM	1983.51	1002.33	981.18	1911.5	936	975.5	1274.17	359.889	0.28245
Wild Type Peptide GVSEWDPILEELQEM, Peptide Substitution Scan (PEP201752521)	30	30	GVZEWDPILEELQEM	2077.12	1197.25	879.87	2114	1081	1033
Wild Type Peptide GVSEWDPILEELQEM, Peptide Substitution Scan (PEP201752521)	14	54	GVZEWDPILEELQEM	2613.7	883.75	1729.95	2639	825	1814
Wild Type Peptide GVSEWDPILEELQEM, Peptide Substitution Scan (PEP201752521)	14	18	GVKEWDPILEELQEM	1773.51	1002.33	771.18	1633	936	697	791.333	149.778	0.189273
Wild Type Peptide GVSEWDPILEELQEM, Peptide Substitution Scan (PEP201752521)	30	18	GVKEWDPILEELQEM	2150.44	1197.25	953.2	2097	1081	1016
Wild Type Peptide GVSEWDPILEELQEM, Peptide Substitution Scan (PEP201752521)	14	42	GVKEWDPILEELQEM	1464.43	883.75	580.68	1486	825	661
Wild Type Peptide GVSEWDPILEELQEM, Peptide Substitution Scan (PEP201752521)	14	19	GVLEWDPILEELQEM	2267.46	1002.33	1265.13	2424	936	1488	1508.33	225.778	0.149687
Wild Type Peptide GVSEWDPILEELQEM, Peptide Substitution Scan (PEP201752521)	30	19	GVLEWDPILEELQEM	2897.39	1197.25	1700.14	2928	1081	1847
Wild Type Peptide GVSEWDPILEELQEM, Peptide Substitution Scan (PEP201752521)	14	43	GVLEWDPILEELQEM	1998.82	883.75	1115.07	2015	825	1190
Wild Type Peptide GVSEWDPILEELQEM, Peptide Substitution Scan (PEP201752521)	14	20	GVMEWDPILEELQEM	1740.71	1002.33	738.38	1682	936	746	1023.83	210.778	0.205871
Wild Type Peptide GVSEWDPILEELQEM, Peptide Substitution Scan (PEP201752521)	30	20	GVMEWDPILEELQEM	2546.56	1197.25	1349.31	2421	1081	1340
Wild Type Peptide GVSEWDPILEELQEM, Peptide Substitution Scan (PEP201752521)	14	44	GVMEWDPILEELQEM	1856.95	883.75	973.2	1810.5	825	985.5
Wild Type Peptide GVSEWDPILEELQEM, Peptide Substitution Scan (PEP201752521)	14	21	GVNEWDPILEELQEM	2024.4	1002.33	1022.08	2047	936	1111	1352.17	160.778	0.118904
Wild Type Peptide GVSEWDPILEELQEM, Peptide Substitution Scan (PEP201752521)	30	21	GVNEWDPILEELQEM	2654.56	1197.25	1457.31	2576	1081	1495
Wild Type Peptide GVSEWDPILEELQEM, Peptide Substitution Scan (PEP201752521)	14	45	GVNEWDPILEELQEM	2364.65	883.75	1480.9	2275.5	825	1450.5
Wild Type Peptide GVSEWDPILEELQEM, Peptide Substitution Scan (PEP201752521)	14	31	GVOEWDPILEELQEM	3198.23	1002.33	2195.91	2314	936	1378	1088.33	193.111	0.177437
Wild Type Peptide GVSEWDPILEELQEM, Peptide Substitution Scan (PEP201752521)	30	31	GVOEWDPILEELQEM	1902.18	1197.25	704.94	1927	1081	846
Wild Type Peptide GVSEWDPILEELQEM, Peptide Substitution Scan (PEP201752521)	14	55	GVOEWDPILEELQEM	2024.01	883.75	1140.26	1866	825	1041
Wild Type Peptide GVSEWDPILEELQEM, Peptide Substitution Scan (PEP201752521)	14	22	GVPEWDPILEELQEM	1890.74	1002.33	888.41	1889	936	953	977.667	42.2222	0.0431867
Wild Type Peptide GVSEWDPILEELQEM, Peptide Substitution Scan (PEP201752521)	30	22	GVPEWDPILEELQEM	2138.88	1197.25	941.63	2020	1081	939
Wild Type Peptide GVSEWDPILEELQEM, Peptide Substitution Scan (PEP201752521)	14	46	GVPEWDPILEELQEM	2039.19	883.75	1155.44	1866	825	1041
Wild Type Peptide GVSEWDPILEELQEM, Peptide Substitution Scan (PEP201752521)	14	23	GVQEWDPILEELQEM	2280.86	1002.33	1278.54	2247.5	936	1311.5	1534.83	148.889	0.0970066
Wild Type Peptide GVSEWDPILEELQEM, Peptide Substitution Scan (PEP201752521)	30	23	GVQEWDPILEELQEM	2807.6	1197.25	1610.35	2787	1081	1706
Wild Type Peptide GVSEWDPILEELQEM, Peptide Substitution Scan (PEP201752521)	14	47	GVQEWDPILEELQEM	2468.01	883.75	1584.26	2412	825	1587
Wild Type Peptide GVSEWDPILEELQEM, Peptide Substitution Scan (PEP201752521)	14	24	GVREWDPILEELQEM	1867.11	1002.33	864.78	1803	936	867	1326.5	346	0.260837
Wild Type Peptide GVSEWDPILEELQEM, Peptide Substitution Scan (PEP201752521)	30	24	GVREWDPILEELQEM	2923.41	1197.25	1726.16	2926.5	1081	1845.5
Wild Type Peptide GVSEWDPILEELQEM, Peptide Substitution Scan (PEP201752521)	14	48	GVREWDPILEELQEM	2220.03	883.75	1336.28	2092	825	1267
Wild Type Peptide GVSEWDPILEELQEM, Deletion Series (PEP201752521)	18	46	GVS	399.33	825.98	0	402	701	0	0	0	0
Wild Type Peptide GVSEWDPILEELQEM, Deletion Series (PEP201752521)	19	46	GVS	408.13	825.98	0	409	701	0
Wild Type Peptide GVSEWDPILEELQEM, Deletion Series (PEP201752521)	20	46	GVS	413.91	825.98	0	411	701	0
Wild Type Peptide GVSEWDPILEELQEM, Peptide Substitution Scan (PEP201752521)	13	10	GVSAWDPILEELQEM	1020.21	1002.33	17.88	1047	936	111	243.333	88.2222	0.362557
Wild Type Peptide GVSEWDPILEELQEM, Peptide Substitution Scan (PEP201752521)	29	10	GVSAWDPILEELQEM	1359.93	1197.25	162.68	1335	1081	254
Wild Type Peptide GVSEWDPILEELQEM, Peptide Substitution Scan (PEP201752521)	13	34	GVSAWDPILEELQEM	1178.36	883.75	294.61	1190	825	365
Wild Type Peptide GVSEWDPILEELQEM, Peptide Substitution Scan (PEP201752521)	13	11	GVSCWDPILEELQEM	1566.56	1002.33	564.23	1631	936	695	904.667	219.556	0.242692
Wild Type Peptide GVSEWDPILEELQEM, Peptide Substitution Scan (PEP201752521)	29	11	GVSCWDPILEELQEM	2256.31	1197.25	1059.07	2315	1081	1234
Wild Type Peptide GVSEWDPILEELQEM, Peptide Substitution Scan (PEP201752521)	13	35	GVSCWDPILEELQEM	1567.8	883.75	684.06	1610	825	785
Wild Type Peptide GVSEWDPILEELQEM, Peptide Substitution Scan (PEP201752521)	13	12	GVSDWDPILEELQEM	2225.92	1002.33	1223.59	2275	936	1339	1852.5	410	0.221323
Wild Type Peptide GVSEWDPILEELQEM, Peptide Substitution Scan (PEP201752521)	29	12	GVSDWDPILEELQEM	3439.25	1197.25	2242	3548.5	1081	2467.5
Wild Type Peptide GVSEWDPILEELQEM, Peptide Substitution Scan (PEP201752521)	13	36	GVSDWDPILEELQEM	2638.78	883.75	1755.03	2576	825	1751
Wild Type Peptide GVSEWDPILEELQEM, Deletion Series (PEP201752521)	18	45	GVSE	477.83	825.98	0	477	701	0	0	0	0
Wild Type Peptide GVSEWDPILEELQEM, Deletion Series (PEP201752521)	19	45	GVSE	520.25	825.98	0	512	701	0
Wild Type Peptide GVSEWDPILEELQEM, Deletion Series (PEP201752521)	20	45	GVSE	495.11	825.98	0	493	701	0
Wild Type Peptide GVSEWDPILEELQEM, Peptide Substitution Scan (PEP201752521)	12	10	GVSEADPILEELQEM	749.3	1002.33	0	720	936	0	0	0	0
Wild Type Peptide GVSEWDPILEELQEM, Peptide Substitution Scan (PEP201752521)	28	10	GVSEADPILEELQEM	1060.86	1197.25	0	985	1081	0
Wild Type Peptide GVSEWDPILEELQEM, Peptide Substitution Scan (PEP201752521)	12	34	GVSEADPILEELQEM	822.62	883.75	0	790	825	0
Wild Type Peptide GVSEWDPILEELQEM, Peptide Substitution Scan (PEP201752521)	12	11	GVSECDPILEELQEM	1221.57	1002.33	219.25	1236	936	300	469.667	123.556	0.263071
Wild Type Peptide GVSEWDPILEELQEM, Peptide Substitution Scan (PEP201752521)	28	11	GVSECDPILEELQEM	1723.33	1197.25	526.09	1736	1081	655
Wild Type Peptide GVSEWDPILEELQEM, Peptide Substitution Scan (PEP201752521)	12	35	GVSECDPILEELQEM	1267.32	883.75	383.57	1279	825	454
Wild Type Peptide GVSEWDPILEELQEM, Peptide Substitution Scan (PEP201752521)	12	12	GVSEDDPILEELQEM	1045.37	1002.33	43.04	1011	936	75	96.3333	29.7778	0.309112
Wild Type Peptide GVSEWDPILEELQEM, Peptide Substitution Scan (PEP201752521)	28	12	GVSEDDPILEELQEM	1316.99	1197.25	119.74	1222	1081	141
Wild Type Peptide GVSEWDPILEELQEM, Peptide Substitution Scan (PEP201752521)	12	36	GVSEDDPILEELQEM	915.92	883.75	32.17	898	825	73
Wild Type Peptide GVSEWDPILEELQEM, Peptide Substitution Scan (PEP201752521)	12	13	GVSEEDPILEELQEM	1103.39	1002.33	101.06	1104	936	168	161	36	0.223602
Wild Type Peptide GVSEWDPILEELQEM, Peptide Substitution Scan (PEP201752521)	28	13	GVSEEDPILEELQEM	1376.54	1197.25	179.29	1289	1081	208
Wild Type Peptide GVSEWDPILEELQEM, Peptide Substitution Scan (PEP201752521)	12	37	GVSEEDPILEELQEM	940.99	883.75	57.24	932	825	107
Wild Type Peptide GVSEWDPILEELQEM, Peptide Substitution Scan (PEP201752521)	12	14	GVSEFDPILEELQEM	1301.2	1002.33	298.87	1317	936	381	357.5	52.3333	0.146387
Wild Type Peptide GVSEWDPILEELQEM, Peptide Substitution Scan (PEP201752521)	28	14	GVSEFDPILEELQEM	1637.38	1197.25	440.13	1493.5	1081	412.5
Wild Type Peptide GVSEWDPILEELQEM, Peptide Substitution Scan (PEP201752521)	12	38	GVSEFDPILEELQEM	1126.84	883.75	243.09	1104	825	279
Wild Type Peptide GVSEWDPILEELQEM, Peptide Substitution Scan (PEP201752521)	12	15	GVSEGDPILEELQEM	910.35	1002.33	0	896	936	0	0	0	0
Wild Type Peptide GVSEWDPILEELQEM, Peptide Substitution Scan (PEP201752521)	28	15	GVSEGDPILEELQEM	1033.6	1197.25	0	1010	1081	0
Wild Type Peptide GVSEWDPILEELQEM, Peptide Substitution Scan (PEP201752521)	12	39	GVSEGDPILEELQEM	801.9	883.75	0	793	825	0
Wild Type Peptide GVSEWDPILEELQEM, Peptide Substitution Scan (PEP201752521)	12	16	GVSEHDPILEELQEM	876.33	1002.33	0	854	936	0	0	0	0
Wild Type Peptide GVSEWDPILEELQEM, Peptide Substitution Scan (PEP201752521)	28	16	GVSEHDPILEELQEM	960.54	1197.25	0	938	1081	0
Wild Type Peptide GVSEWDPILEELQEM, Peptide Substitution Scan (PEP201752521)	12	40	GVSEHDPILEELQEM	753.02	883.75	0	739	825	0
Wild Type Peptide GVSEWDPILEELQEM, Peptide Substitution Scan (PEP201752521)	12	17	GVSEIDPILEELQEM	921.23	1002.33	0	909	936	0	0	0	0
Wild Type Peptide GVSEWDPILEELQEM, Peptide Substitution Scan (PEP201752521)	28	17	GVSEIDPILEELQEM	1004.57	1197.25	0	984	1081	0
Wild Type Peptide GVSEWDPILEELQEM, Peptide Substitution Scan (PEP201752521)	12	41	GVSEIDPILEELQEM	818.56	883.75	0	795	825	0
Wild Type Peptide GVSEWDPILEELQEM, Peptide Substitution Scan (PEP201752521)	12	30	GVSEZDPILEELQEM	825.36	1002.33	0	793	936	0	0	0	0
Wild Type Peptide GVSEWDPILEELQEM, Peptide Substitution Scan (PEP201752521)	28	30	GVSEZDPILEELQEM	845.31	1197.25	0	850	1081	0
Wild Type Peptide GVSEWDPILEELQEM, Peptide Substitution Scan (PEP201752521)	12	54	GVSEZDPILEELQEM	834.28	883.75	0	823	825	0
Wild Type Peptide GVSEWDPILEELQEM, Peptide Substitution Scan (PEP201752521)	12	18	GVSEKDPILEELQEM	853.96	1002.33	0	833	936	0	0	0	0
Wild Type Peptide GVSEWDPILEELQEM, Peptide Substitution Scan (PEP201752521)	28	18	GVSEKDPILEELQEM	871.44	1197.25	0	847	1081	0
Wild Type Peptide GVSEWDPILEELQEM, Peptide Substitution Scan (PEP201752521)	12	42	GVSEKDPILEELQEM	772.19	883.75	0	770	825	0
Wild Type Peptide GVSEWDPILEELQEM, Peptide Substitution Scan (PEP201752521)	12	19	GVSELDPILEELQEM	952.8	1002.33	0	944	936	8	27	30.6667	1.1358
Wild Type Peptide GVSEWDPILEELQEM, Peptide Substitution Scan (PEP201752521)	28	19	GVSELDPILEELQEM	982.38	1197.25	0	959	1081	0
Wild Type Peptide GVSEWDPILEELQEM, Peptide Substitution Scan (PEP201752521)	12	43	GVSELDPILEELQEM	917.25	883.75	33.5	898	825	73
Wild Type Peptide GVSEWDPILEELQEM, Peptide Substitution Scan (PEP201752521)	12	20	GVSEMDPILEELQEM	885.85	1002.33	0	873	936	0	2	2.66667	1.33333
Wild Type Peptide GVSEWDPILEELQEM, Peptide Substitution Scan (PEP201752521)	28	20	GVSEMDPILEELQEM	911.77	1197.25	0	898	1081	0
Wild Type Peptide GVSEWDPILEELQEM, Peptide Substitution Scan (PEP201752521)	12	44	GVSEMDPILEELQEM	864.8	883.75	0	831	825	6
Wild Type Peptide GVSEWDPILEELQEM, Peptide Substitution Scan (PEP201752521)	12	21	GVSENDPILEELQEM	932.53	1002.33	0	913	936	0	0	0	0
Wild Type Peptide GVSEWDPILEELQEM, Peptide Substitution Scan (PEP201752521)	28	21	GVSENDPILEELQEM	893.03	1197.25	0	860	1081	0
Wild Type Peptide GVSEWDPILEELQEM, Peptide Substitution Scan (PEP201752521)	12	45	GVSENDPILEELQEM	842.16	883.75	0	791	825	0
Wild Type Peptide GVSEWDPILEELQEM, Peptide Substitution Scan (PEP201752521)	12	31	GVSEODPILEELQEM	721.17	1002.33	0	711	936	0	0	0	0
Wild Type Peptide GVSEWDPILEELQEM, Peptide Substitution Scan (PEP201752521)	28	31	GVSEODPILEELQEM	881.07	1197.25	0	856	1081	0
Wild Type Peptide GVSEWDPILEELQEM, Peptide Substitution Scan (PEP201752521)	12	55	GVSEODPILEELQEM	796.5	883.75	0	785	825	0
Wild Type Peptide GVSEWDPILEELQEM, Peptide Substitution Scan (PEP201752521)	12	22	GVSEPDPILEELQEM	986.1	1002.33	0	931	936	0	0	0	0
Wild Type Peptide GVSEWDPILEELQEM, Peptide Substitution Scan (PEP201752521)	28	22	GVSEPDPILEELQEM	1034.4	1197.25	0	961	1081	0
Wild Type Peptide GVSEWDPILEELQEM, Peptide Substitution Scan (PEP201752521)	12	46	GVSEPDPILEELQEM	806.68	883.75	0	791	825	0
Wild Type Peptide GVSEWDPILEELQEM, Peptide Substitution Scan (PEP201752521)	12	23	GVSEQDPILEELQEM	916.62	1002.33	0	886	936	0	0	0	0
Wild Type Peptide GVSEWDPILEELQEM, Peptide Substitution Scan (PEP201752521)	28	23	GVSEQDPILEELQEM	924.56	1197.25	0	909	1081	0
Wild Type Peptide GVSEWDPILEELQEM, Peptide Substitution Scan (PEP201752521)	12	47	GVSEQDPILEELQEM	840.83	883.75	0	814	825	0
Wild Type Peptide GVSEWDPILEELQEM, Peptide Substitution Scan (PEP201752521)	12	24	GVSERDPILEELQEM	812.06	1002.33	0	787	936	0	0	0	0
Wild Type Peptide GVSEWDPILEELQEM, Peptide Substitution Scan (PEP201752521)	28	24	GVSERDPILEELQEM	898.29	1197.25	0	873	1081	0
Wild Type Peptide GVSEWDPILEELQEM, Peptide Substitution Scan (PEP201752521)	12	48	GVSERDPILEELQEM	851.85	883.75	0	816	825	0
Wild Type Peptide GVSEWDPILEELQEM, Peptide Substitution Scan (PEP201752521)	12	25	GVSESDPILEELQEM	918.42	1002.33	0	898	936	0	7.33333	9.77778	1.33333
Wild Type Peptide GVSEWDPILEELQEM, Peptide Substitution Scan (PEP201752521)	28	25	GVSESDPILEELQEM	886.74	1197.25	0	848	1081	0
Wild Type Peptide GVSEWDPILEELQEM, Peptide Substitution Scan (PEP201752521)	12	49	GVSESDPILEELQEM	873.72	883.75	0	847	825	22
Wild Type Peptide GVSEWDPILEELQEM, Peptide Substitution Scan (PEP201752521)	12	26	GVSETDPILEELQEM	752.98	1002.33	0	743	936	0	6.66667	8.88889	1.33333
Wild Type Peptide GVSEWDPILEELQEM, Peptide Substitution Scan (PEP201752521)	28	26	GVSETDPILEELQEM	860.09	1197.25	0	835	1081	0
Wild Type Peptide GVSEWDPILEELQEM, Peptide Substitution Scan (PEP201752521)	12	50	GVSETDPILEELQEM	875.46	883.75	0	845	825	20
Wild Type Peptide GVSEWDPILEELQEM, Peptide Substitution Scan (PEP201752521)	12	32	GVSEUDPILEELQEM	730.91	1002.33	0	724	936	0	6.33333	8.44444	1.33333
Wild Type Peptide GVSEWDPILEELQEM, Peptide Substitution Scan (PEP201752521)	28	32	GVSEUDPILEELQEM	1655.29	1197.25	458.05	1100	1081	19
Wild Type Peptide GVSEWDPILEELQEM, Peptide Substitution Scan (PEP201752521)	12	56	GVSEUDPILEELQEM	753.25	883.75	0	747	825	0
Wild Type Peptide GVSEWDPILEELQEM, Peptide Substitution Scan (PEP201752521)	12	27	GVSEVDPILEELQEM	808.25	1002.33	0	795	936	0	7	9.33333	1.33333
Wild Type Peptide GVSEWDPILEELQEM, Peptide Substitution Scan (PEP201752521)	28	27	GVSEVDPILEELQEM	947.49	1197.25	0	930	1081	0
Wild Type Peptide GVSEWDPILEELQEM, Peptide Substitution Scan (PEP201752521)	12	51	GVSEVDPILEELQEM	860.2	883.75	0	846	825	21
Wild Type Peptide GVSEWDPILEELQEM, Deletion Series (PEP201752521)	18	44	GVSEW	672.05	825.98	0	665	701	0	3.33333	4.44444	1.33333
Wild Type Peptide GVSEWDPILEELQEM, Deletion Series (PEP201752521)	19	44	GVSEW	708.98	825.98	0	711	701	10
Wild Type Peptide GVSEWDPILEELQEM, Deletion Series (PEP201752521)	20	44	GVSEW	627.58	825.98	0	613	701	0
Wild Type Peptide GVSEWDPILEELQEM, Peptide Substitution Scan (PEP201752521)	11	10	GVSEWAPILEELQEM	790.41	1002.33	0	732	936	0	0	0	0
Wild Type Peptide GVSEWDPILEELQEM, Peptide Substitution Scan (PEP201752521)	27	10	GVSEWAPILEELQEM	1013.11	1197.25	0	961	1081	0
Wild Type Peptide GVSEWDPILEELQEM, Peptide Substitution Scan (PEP201752521)	11	34	GVSEWAPILEELQEM	806.54	883.75	0	813	825	0
Wild Type Peptide GVSEWDPILEELQEM, Peptide Substitution Scan (PEP201752521)	11	11	GVSEWCPILEELQEM	1204.49	1002.33	202.17	1189	936	253	653.333	287.111	0.439456
Wild Type Peptide GVSEWDPILEELQEM, Peptide Substitution Scan (PEP201752521)	27	11	GVSEWCPILEELQEM	2196.23	1197.25	998.98	2165	1081	1084
Wild Type Peptide GVSEWDPILEELQEM, Peptide Substitution Scan (PEP201752521)	11	35	GVSEWCPILEELQEM	1438.94	883.75	555.19	1448	825	623
Wild Type Peptide GVSEWDPILEELQEM, Deletion Series (PEP201752521)	18	43	GVSEWD	2023.13	825.98	1197.15	1938	701	1237	1245.67	42.2222	0.0338953
Wild Type Peptide GVSEWDPILEELQEM, Deletion Series (PEP201752521)	19	43	GVSEWD	1885.52	825.98	1059.53	1892	701	1191
Wild Type Peptide GVSEWDPILEELQEM, Deletion Series (PEP201752521)	20	43	GVSEWD	1934.45	825.98	1108.46	2010	701	1309
Wild Type Peptide GVSEWDPILEELQEM, Peptide Substitution Scan (PEP201752521)	10	10	GVSEWDAILEELQEM	2230.5	1002.33	1228.17	1902	936	966	1760.33	813.111	0.461907
Wild Type Peptide GVSEWDPILEELQEM, Peptide Substitution Scan (PEP201752521)	26	10	GVSEWDAILEELQEM	4108.55	1197.25	2911.3	4061	1081	2980
Wild Type Peptide GVSEWDPILEELQEM, Peptide Substitution Scan (PEP201752521)	10	34	GVSEWDAILEELQEM	2258.3	883.75	1374.55	2160	825	1335
Wild Type Peptide GVSEWDPILEELQEM, Peptide Substitution Scan (PEP201752521)	10	11	GVSEWDCILEELQEM	6677.7	1002.33	5675.37	6247	936	5311	6426.17	1337.56	0.208142
Wild Type Peptide GVSEWDPILEELQEM, Peptide Substitution Scan (PEP201752521)	26	11	GVSEWDCILEELQEM	9319.85	1197.25	8122.6	9513.5	1081	8432.5
Wild Type Peptide GVSEWDPILEELQEM, Peptide Substitution Scan (PEP201752521)	10	35	GVSEWDCILEELQEM	6351.65	883.75	5467.91	6360	825	5535
Wild Type Peptide GVSEWDPILEELQEM, Peptide Substitution Scan (PEP201752521)	10	12	GVSEWDDILEELQEM	8342.81	1002.33	7340.48	8823	936	7887	8508.67	1437.56	0.168952
Wild Type Peptide GVSEWDPILEELQEM, Peptide Substitution Scan (PEP201752521)	26	12	GVSEWDDILEELQEM	11506.5	1197.25	10309.3	11746	1081	10665
Wild Type Peptide GVSEWDPILEELQEM, Peptide Substitution Scan (PEP201752521)	10	36	GVSEWDDILEELQEM	7690.61	883.75	6806.86	7799	825	6974
Wild Type Peptide GVSEWDPILEELQEM, Peptide Substitution Scan (PEP201752521)	10	13	GVSEWDEILEELQEM	7517.54	1002.33	6515.21	7349	936	6413	7848.83	1734.78	0.221024
Wild Type Peptide GVSEWDPILEELQEM, Peptide Substitution Scan (PEP201752521)	26	13	GVSEWDEILEELQEM	12172	1197.25	10974.8	11532	1081	10451
Wild Type Peptide GVSEWDPILEELQEM, Peptide Substitution Scan (PEP201752521)	10	37	GVSEWDEILEELQEM	7704.21	883.75	6820.46	7507.5	825	6682.5
Wild Type Peptide GVSEWDPILEELQEM, Peptide Substitution Scan (PEP201752521)	10	14	GVSEWDFILEELQEM	23874.7	1002.33	22872.4	25022	936	24086	24305.7	4312.22	0.177416
Wild Type Peptide GVSEWDPILEELQEM, Peptide Substitution Scan (PEP201752521)	26	14	GVSEWDFILEELQEM	29991.5	1197.25	28794.3	31855	1081	30774
Wild Type Peptide GVSEWDPILEELQEM, Peptide Substitution Scan (PEP201752521)	10	38	GVSEWDFILEELQEM	18223	883.75	17339.2	18882	825	18057
Wild Type Peptide GVSEWDPILEELQEM, Peptide Substitution Scan (PEP201752521)	10	15	GVSEWDGILEELQEM	1596.13	1002.33	593.81	1579	936	643	622.333	112.889	0.181396
Wild Type Peptide GVSEWDPILEELQEM, Peptide Substitution Scan (PEP201752521)	26	15	GVSEWDGILEELQEM	1900.24	1197.25	702.99	1852	1081	771
Wild Type Peptide GVSEWDPILEELQEM, Peptide Substitution Scan (PEP201752521)	10	39	GVSEWDGILEELQEM	1352.48	883.75	468.73	1278	825	453
Wild Type Peptide GVSEWDPILEELQEM, Peptide Substitution Scan (PEP201752521)	10	16	GVSEWDHILEELQEM	3444	1002.33	2441.67	2847	936	1911	1738.67	302.444	0.173952
Wild Type Peptide GVSEWDPILEELQEM, Peptide Substitution Scan (PEP201752521)	26	16	GVSEWDHILEELQEM	3147.2	1197.25	1949.96	3101	1081	2020
Wild Type Peptide GVSEWDPILEELQEM, Peptide Substitution Scan (PEP201752521)	10	40	GVSEWDHILEELQEM	2147.41	883.75	1263.66	2110	825	1285
Wild Type Peptide GVSEWDPILEELQEM, Peptide Substitution Scan (PEP201752521)	10	17	GVSEWDIILEELQEM	11384.1	1002.33	10381.8	12282	936	11346	10150.5	797	0.0785183
Wild Type Peptide GVSEWDPILEELQEM, Peptide Substitution Scan (PEP201752521)	26	17	GVSEWDIILEELQEM	10564.2	1197.25	9367	10756.5	1081	9675.5
Wild Type Peptide GVSEWDPILEELQEM, Peptide Substitution Scan (PEP201752521)	10	41	GVSEWDIILEELQEM	9921.32	883.75	9037.57	10255	825	9430
Wild Type Peptide GVSEWDPILEELQEM, Peptide Substitution Scan (PEP201752521)	10	30	GVSEWDZILEELQEM	2256.51	1002.33	1254.18	2040	936	1104	1302.33	132.222	0.101527
Wild Type Peptide GVSEWDPILEELQEM, Peptide Substitution Scan (PEP201752521)	26	30	GVSEWDZILEELQEM	2590.03	1197.25	1392.78	2458	1081	1377
Wild Type Peptide GVSEWDPILEELQEM, Peptide Substitution Scan (PEP201752521)	10	54	GVSEWDZILEELQEM	2279.77	883.75	1396.02	2251	825	1426
Wild Type Peptide GVSEWDPILEELQEM, Peptide Substitution Scan (PEP201752521)	10	18	GVSEWDKILEELQEM	2209.89	1002.33	1207.56	1822	936	886	888.5	52.3333	0.0589008
Wild Type Peptide GVSEWDPILEELQEM, Peptide Substitution Scan (PEP201752521)	26	18	GVSEWDKILEELQEM	2490.1	1197.25	1292.85	2048	1081	967
Wild Type Peptide GVSEWDPILEELQEM, Peptide Substitution Scan (PEP201752521)	10	42	GVSEWDKILEELQEM	1821.29	883.75	937.54	1637.5	825	812.5
Wild Type Peptide GVSEWDPILEELQEM, Peptide Substitution Scan (PEP201752521)	10	19	GVSEWDLILEELQEM	10306.5	1002.33	9304.2	10392	936	9456	11008.3	1243.78	0.112985
Wild Type Peptide GVSEWDPILEELQEM, Peptide Substitution Scan (PEP201752521)	26	19	GVSEWDLILEELQEM	11165.4	1197.25	9968.18	11776	1081	10695
Wild Type Peptide GVSEWDPILEELQEM, Peptide Substitution Scan (PEP201752521)	10	43	GVSEWDLILEELQEM	12935.8	883.75	12052	13699	825	12874
Wild Type Peptide GVSEWDPILEELQEM, Peptide Substitution Scan (PEP201752521)	10	20	GVSEWDMILEELQEM	2361.93	1002.33	1359.6	2351	936	1415	1768.67	339.556	0.191984
Wild Type Peptide GVSEWDPILEELQEM, Peptide Substitution Scan (PEP201752521)	26	20	GVSEWDMILEELQEM	3405.69	1197.25	2208.44	3359	1081	2278
Wild Type Peptide GVSEWDPILEELQEM, Peptide Substitution Scan (PEP201752521)	10	44	GVSEWDMILEELQEM	2369.21	883.75	1485.46	2438	825	1613
Wild Type Peptide GVSEWDPILEELQEM, Peptide Substitution Scan (PEP201752521)	10	21	GVSEWDNILEELQEM	2270.46	1002.33	1268.13	2291	936	1355	1436.33	54.4444	0.0379052
Wild Type Peptide GVSEWDPILEELQEM, Peptide Substitution Scan (PEP201752521)	26	21	GVSEWDNILEELQEM	2787.69	1197.25	1590.45	2599	1081	1518
Wild Type Peptide GVSEWDPILEELQEM, Peptide Substitution Scan (PEP201752521)	10	45	GVSEWDNILEELQEM	2525.59	883.75	1641.84	2261	825	1436
Wild Type Peptide GVSEWDPILEELQEM, Peptide Substitution Scan (PEP201752521)	10	31	GVSEWDOILEELQEM	2337.54	1002.33	1335.21	2396	936	1460	1942.67	321.778	0.165637
Wild Type Peptide GVSEWDPILEELQEM, Peptide Substitution Scan (PEP201752521)	26	31	GVSEWDOILEELQEM	3004.23	1197.25	1806.99	3046	1081	1965
Wild Type Peptide GVSEWDPILEELQEM, Peptide Substitution Scan (PEP201752521)	10	55	GVSEWDOILEELQEM	3503.18	883.75	2619.44	3228	825	2403
Wild Type Peptide GVSEWDPILEELQEM, Deletion Series (PEP201752521)	18	42	GVSEWDP	2088.21	825.98	1262.23	1684	701	983	878.667	69.5556	0.0791603
Wild Type Peptide GVSEWDPILEELQEM, Deletion Series (PEP201752521)	19	42	GVSEWDP	1701.17	825.98	875.18	1502	701	801
Wild Type Peptide GVSEWDPILEELQEM, Deletion Series (PEP201752521)	20	42	GVSEWDP	2074.62	825.98	1248.64	1553	701	852
Wild Type Peptide GVSEWDPILEELQEM, Peptide Substitution Scan (PEP201752521)	9	10	GVSEWDPALEELQEM	1035.57	1002.33	33.25	1049	936	113	418.333	203.556	0.486587
Wild Type Peptide GVSEWDPILEELQEM, Peptide Substitution Scan (PEP201752521)	25	10	GVSEWDPALEELQEM	1663.77	1197.25	466.53	1694	1081	613
Wild Type Peptide GVSEWDPILEELQEM, Peptide Substitution Scan (PEP201752521)	9	34	GVSEWDPALEELQEM	1385.37	883.75	501.62	1354	825	529
Wild Type Peptide GVSEWDPILEELQEM, Peptide Substitution Scan (PEP201752521)	9	11	GVSEWDPCLEELQEM	2793.03	1002.33	1790.7	2776.5	936	1840.5	2343.83	471.444	0.201142
Wild Type Peptide GVSEWDPILEELQEM, Peptide Substitution Scan (PEP201752521)	25	11	GVSEWDPCLEELQEM	4109.13	1197.25	2911.88	4132	1081	3051
Wild Type Peptide GVSEWDPILEELQEM, Peptide Substitution Scan (PEP201752521)	9	35	GVSEWDPCLEELQEM	3046.18	883.75	2162.43	2965	825	2140
Wild Type Peptide GVSEWDPILEELQEM, Peptide Substitution Scan (PEP201752521)	9	12	GVSEWDPDLEELQEM	4164.11	1002.33	3161.78	3893	936	2957	2872	177.333	0.0617456
Wild Type Peptide GVSEWDPILEELQEM, Peptide Substitution Scan (PEP201752521)	25	12	GVSEWDPDLEELQEM	4443.73	1197.25	3246.49	4134	1081	3053
Wild Type Peptide GVSEWDPILEELQEM, Peptide Substitution Scan (PEP201752521)	9	36	GVSEWDPDLEELQEM	3437.6	883.75	2553.85	3431	825	2606
Wild Type Peptide GVSEWDPILEELQEM, Peptide Substitution Scan (PEP201752521)	9	13	GVSEWDPELEELQEM	2034.79	1002.33	1032.46	1938	936	1002	1927.67	617.111	0.320134
Wild Type Peptide GVSEWDPILEELQEM, Peptide Substitution Scan (PEP201752521)	25	13	GVSEWDPELEELQEM	3694.79	1197.25	2497.54	3554.5	1081	2473.5
Wild Type Peptide GVSEWDPILEELQEM, Peptide Substitution Scan (PEP201752521)	9	37	GVSEWDPELEELQEM	3157.26	883.75	2273.51	3132.5	825	2307.5
Wild Type Peptide GVSEWDPILEELQEM, Peptide Substitution Scan (PEP201752521)	9	14	GVSEWDPFLEELQEM	5000.76	1002.33	3998.44	4777	936	3841	3623	642	0.177201
Wild Type Peptide GVSEWDPILEELQEM, Peptide Substitution Scan (PEP201752521)	25	14	GVSEWDPFLEELQEM	5227.69	1197.25	4030.44	5449	1081	4368
Wild Type Peptide GVSEWDPILEELQEM, Peptide Substitution Scan (PEP201752521)	9	38	GVSEWDPFLEELQEM	3686.01	883.75	2802.26	3485	825	2660
Wild Type Peptide GVSEWDPILEELQEM, Peptide Substitution Scan (PEP201752521)	9	15	GVSEWDPGLEELQEM	1264.61	1002.33	262.28	1245	936	309	303.667	36.4444	0.120015
Wild Type Peptide GVSEWDPILEELQEM, Peptide Substitution Scan (PEP201752521)	25	15	GVSEWDPGLEELQEM	1368.52	1197.25	171.27	1330	1081	249
Wild Type Peptide GVSEWDPILEELQEM, Peptide Substitution Scan (PEP201752521)	9	39	GVSEWDPGLEELQEM	1242.55	883.75	358.8	1178	825	353
Wild Type Peptide GVSEWDPILEELQEM, Peptide Substitution Scan (PEP201752521)	9	16	GVSEWDPHLEELQEM	1322.43	1002.33	320.1	1270	936	334	401.333	44.8889	0.111849
Wild Type Peptide GVSEWDPILEELQEM, Peptide Substitution Scan (PEP201752521)	25	16	GVSEWDPHLEELQEM	1518.68	1197.25	321.43	1522	1081	441
Wild Type Peptide GVSEWDPILEELQEM, Peptide Substitution Scan (PEP201752521)	9	40	GVSEWDPHLEELQEM	1242.22	883.75	358.48	1254	825	429
Wild Type Peptide GVSEWDPILEELQEM, Deletion Series (PEP201752521)	18	41	GVSEWDPI	1451.67	825.98	625.68	1457	701	756	623.5	135	0.21652
Wild Type Peptide GVSEWDPILEELQEM, Deletion Series (PEP201752521)	19	41	GVSEWDPI	1451.93	825.98	625.94	1394.5	701	693.5
Wild Type Peptide GVSEWDPILEELQEM, Deletion Series (PEP201752521)	20	41	GVSEWDPI	1278.73	825.98	452.75	1122	701	421
Wild Type Peptide GVSEWDPILEELQEM, Peptide Substitution Scan (PEP201752521)	8	10	GVSEWDPIAEELQEM	1194.48	1002.33	192.15	1211	936	275	523.333	165.556	0.316348
Wild Type Peptide GVSEWDPILEELQEM, Peptide Substitution Scan (PEP201752521)	24	10	GVSEWDPIAEELQEM	1870.19	1197.25	672.94	1753	1081	672
Wild Type Peptide GVSEWDPILEELQEM, Peptide Substitution Scan (PEP201752521)	8	34	GVSEWDPIAEELQEM	1487.58	883.75	603.83	1448	825	623
Wild Type Peptide GVSEWDPILEELQEM, Peptide Substitution Scan (PEP201752521)	8	11	GVSEWDPICEELQEM	3172.09	1002.33	2169.77	3189	936	2253	2373.83	101.444	0.0427344
Wild Type Peptide GVSEWDPILEELQEM, Peptide Substitution Scan (PEP201752521)	24	11	GVSEWDPICEELQEM	3518.45	1197.25	2321.2	3423.5	1081	2342.5
Wild Type Peptide GVSEWDPILEELQEM, Peptide Substitution Scan (PEP201752521)	8	35	GVSEWDPICEELQEM	3196.9	883.75	2313.15	3351	825	2526
Wild Type Peptide GVSEWDPILEELQEM, Peptide Substitution Scan (PEP201752521)	8	12	GVSEWDPIDEELQEM	2890.62	1002.33	1888.29	2897	936	1961	2295	432.667	0.188526
Wild Type Peptide GVSEWDPILEELQEM, Peptide Substitution Scan (PEP201752521)	24	12	GVSEWDPIDEELQEM	4046.62	1197.25	2849.37	4025	1081	2944
Wild Type Peptide GVSEWDPILEELQEM, Peptide Substitution Scan (PEP201752521)	8	36	GVSEWDPIDEELQEM	2924.13	883.75	2040.38	2805	825	1980
Wild Type Peptide GVSEWDPILEELQEM, Peptide Substitution Scan (PEP201752521)	8	13	GVSEWDPIEEELQEM	2662.07	1002.33	1659.74	2525.5	936	1589.5	2560.5	647.333	0.252815
Wild Type Peptide GVSEWDPILEELQEM, Peptide Substitution Scan (PEP201752521)	24	13	GVSEWDPIEEELQEM	4480.17	1197.25	3282.92	4524	1081	3443
Wild Type Peptide GVSEWDPILEELQEM, Peptide Substitution Scan (PEP201752521)	8	37	GVSEWDPIEEELQEM	3487.77	883.75	2604.02	3474	825	2649
Wild Type Peptide GVSEWDPILEELQEM, Peptide Substitution Scan (PEP201752521)	8	14	GVSEWDPIFEELQEM	3313.31	1002.33	2310.99	3420.5	936	2484.5	3759.17	1596.56	0.42471
Wild Type Peptide GVSEWDPILEELQEM, Peptide Substitution Scan (PEP201752521)	24	14	GVSEWDPIFEELQEM	6674.36	1197.25	5477.11	7235	1081	6154
Wild Type Peptide GVSEWDPILEELQEM, Peptide Substitution Scan (PEP201752521)	8	38	GVSEWDPIFEELQEM	3695.6	883.75	2811.85	3464	825	2639
Wild Type Peptide GVSEWDPILEELQEM, Peptide Substitution Scan (PEP201752521)	8	15	GVSEWDPIGEELQEM	1193.6	1002.33	191.27	1183.5	936	247.5	324.833	63.4444	0.195314
Wild Type Peptide GVSEWDPILEELQEM, Peptide Substitution Scan (PEP201752521)	24	15	GVSEWDPIGEELQEM	1400.07	1197.25	202.82	1388	1081	307
Wild Type Peptide GVSEWDPILEELQEM, Peptide Substitution Scan (PEP201752521)	8	39	GVSEWDPIGEELQEM	1211.67	883.75	327.93	1245	825	420
Wild Type Peptide GVSEWDPILEELQEM, Peptide Substitution Scan (PEP201752521)	8	16	GVSEWDPIHEELQEM	1333.67	1002.33	331.34	1327	936	391	440.667	37.5556	0.0852244
Wild Type Peptide GVSEWDPILEELQEM, Peptide Substitution Scan (PEP201752521)	24	16	GVSEWDPIHEELQEM	1557.17	1197.25	359.92	1515	1081	434
Wild Type Peptide GVSEWDPILEELQEM, Peptide Substitution Scan (PEP201752521)	8	40	GVSEWDPIHEELQEM	1334.34	883.75	450.59	1322	825	497
Wild Type Peptide GVSEWDPILEELQEM, Peptide Substitution Scan (PEP201752521)	8	17	GVSEWDPIIEELQEM	2566.72	1002.33	1564.4	2656	936	1720	1520.33	133.111	0.0875539
Wild Type Peptide GVSEWDPILEELQEM, Peptide Substitution Scan (PEP201752521)	24	17	GVSEWDPIIEELQEM	2764.91	1197.25	1567.66	2547	1081	1466
Wild Type Peptide GVSEWDPILEELQEM, Peptide Substitution Scan (PEP201752521)	8	41	GVSEWDPIIEELQEM	2171.33	883.75	1287.58	2200	825	1375
Wild Type Peptide GVSEWDPILEELQEM, Peptide Substitution Scan (PEP201752521)	8	30	GVSEWDPIZEELQEM	1241.27	1002.33	238.94	1238.5	936	302.5	236.167	113.444	0.480358
Wild Type Peptide GVSEWDPILEELQEM, Peptide Substitution Scan (PEP201752521)	24	30	GVSEWDPIZEELQEM	1164.81	1197.25	0	1147	1081	66
Wild Type Peptide GVSEWDPILEELQEM, Peptide Substitution Scan (PEP201752521)	8	54	GVSEWDPIZEELQEM	1176.47	883.75	292.72	1165	825	340
Wild Type Peptide GVSEWDPILEELQEM, Peptide Substitution Scan (PEP201752521)	8	18	GVSEWDPIKEELQEM	1193.76	1002.33	191.43	1167	936	231	249.667	69.5556	0.278594
Wild Type Peptide GVSEWDPILEELQEM, Peptide Substitution Scan (PEP201752521)	24	18	GVSEWDPIKEELQEM	1256.73	1197.25	59.48	1245	1081	164
Wild Type Peptide GVSEWDPILEELQEM, Peptide Substitution Scan (PEP201752521)	8	42	GVSEWDPIKEELQEM	1153.78	883.75	270.04	1179	825	354
Wild Type Peptide GVSEWDPILEELQEM, Deletion Series (PEP201752521)	18	40	GVSEWDPIL	1556.54	825.98	730.56	1603	701	902	662.167	162.778	0.245826
Wild Type Peptide GVSEWDPILEELQEM, Deletion Series (PEP201752521)	19	40	GVSEWDPIL	1335.46	825.98	509.47	1367.5	701	666.5
Wild Type Peptide GVSEWDPILEELQEM, Deletion Series (PEP201752521)	20	40	GVSEWDPIL	1242.03	825.98	416.05	1119	701	418
Wild Type Peptide GVSEWDPILEELQEM, Peptide Substitution Scan (PEP201752521)	7	10	GVSEWDPILAELQEM	911.09	1002.33	0	860	936	0	183	122	0.666667
Wild Type Peptide GVSEWDPILEELQEM, Peptide Substitution Scan (PEP201752521)	23	10	GVSEWDPILAELQEM	1274.18	1197.25	76.93	1267	1081	186
Wild Type Peptide GVSEWDPILEELQEM, Peptide Substitution Scan (PEP201752521)	7	34	GVSEWDPILAELQEM	1222.02	883.75	338.27	1188	825	363
Wild Type Peptide GVSEWDPILEELQEM, Peptide Substitution Scan (PEP201752521)	7	11	GVSEWDPILCELQEM	2018.88	1002.33	1016.55	1988	936	1052	1211.33	106.222	0.0876903
Wild Type Peptide GVSEWDPILEELQEM, Peptide Substitution Scan (PEP201752521)	23	11	GVSEWDPILCELQEM	2302.53	1197.25	1105.28	2305	1081	1224
Wild Type Peptide GVSEWDPILEELQEM, Peptide Substitution Scan (PEP201752521)	7	35	GVSEWDPILCELQEM	2162.11	883.75	1278.36	2183	825	1358
Wild Type Peptide GVSEWDPILEELQEM, Peptide Substitution Scan (PEP201752521)	7	12	GVSEWDPILDELQEM	2180.01	1002.33	1177.69	2251	936	1315	1533.67	244.222	0.159241
Wild Type Peptide GVSEWDPILEELQEM, Peptide Substitution Scan (PEP201752521)	23	12	GVSEWDPILDELQEM	3132.69	1197.25	1935.44	2981	1081	1900
Wild Type Peptide GVSEWDPILEELQEM, Peptide Substitution Scan (PEP201752521)	7	36	GVSEWDPILDELQEM	2178.54	883.75	1294.79	2211	825	1386
Wild Type Peptide GVSEWDPILEELQEM, Deletion Series (PEP201752521)	18	39	GVSEWDPILE	3175.99	825.98	2350.01	3150.5	701	2449.5	2357.33	381.222	0.161718
Wild Type Peptide GVSEWDPILEELQEM, Deletion Series (PEP201752521)	19	39	GVSEWDPILE	2644.92	825.98	1818.94	2486.5	701	1785.5
Wild Type Peptide GVSEWDPILEELQEM, Deletion Series (PEP201752521)	20	39	GVSEWDPILE	3610.75	825.98	2784.77	3538	701	2837
Wild Type Peptide GVSEWDPILEELQEM, Peptide Substitution Scan (PEP201752521)	6	10	GVSEWDPILEALQEM	833.97	1002.33	0	842	936	0	115	152.667	1.32754
Wild Type Peptide GVSEWDPILEELQEM, Peptide Substitution Scan (PEP201752521)	22	10	GVSEWDPILEALQEM	1150.54	1197.25	0	1082	1081	1
Wild Type Peptide GVSEWDPILEELQEM, Peptide Substitution Scan (PEP201752521)	6	34	GVSEWDPILEALQEM	1230.1	883.75	346.35	1169	825	344
Wild Type Peptide GVSEWDPILEELQEM, Peptide Substitution Scan (PEP201752521)	6	11	GVSEWDPILECLQEM	1327.06	1002.33	324.73	1346	936	410	801.167	260.778	0.325498
Wild Type Peptide GVSEWDPILEELQEM, Peptide Substitution Scan (PEP201752521)	22	11	GVSEWDPILECLQEM	2118.7	1197.25	921.45	2180.5	1081	1099.5
Wild Type Peptide GVSEWDPILEELQEM, Peptide Substitution Scan (PEP201752521)	6	35	GVSEWDPILECLQEM	1738.87	883.75	855.12	1719	825	894
Wild Type Peptide GVSEWDPILEELQEM, Peptide Substitution Scan (PEP201752521)	6	12	GVSEWDPILEDLQEM	2243.18	1002.33	1240.85	2218	936	1282	1633.67	234.444	0.143508
Wild Type Peptide GVSEWDPILEELQEM, Peptide Substitution Scan (PEP201752521)	22	12	GVSEWDPILEDLQEM	3194.29	1197.25	1997.05	3033	1081	1952
Wild Type Peptide GVSEWDPILEELQEM, Peptide Substitution Scan (PEP201752521)	6	36	GVSEWDPILEDLQEM	2505.23	883.75	1621.48	2492	825	1667
Wild Type Peptide GVSEWDPILEELQEM, Deletion Series (PEP201752521)	18	38	GVSEWDPILEE	6624.86	825.98	5798.88	6897	701	6196	5726.67	509.778	0.0890182
Wild Type Peptide GVSEWDPILEELQEM, Deletion Series (PEP201752521)	19	38	GVSEWDPILEE	5608.22	825.98	4782.23	5663	701	4962
Wild Type Peptide GVSEWDPILEELQEM, Deletion Series (PEP201752521)	20	38	GVSEWDPILEE	6471.97	825.98	5645.99	6723	701	6022
Wild Type Peptide GVSEWDPILEELQEM, Peptide Substitution Scan (PEP201752521)	5	10	GVSEWDPILEEAQEM	1306.62	1002.33	304.29	1228	936	292	553.167	174.111	0.314753
Wild Type Peptide GVSEWDPILEELQEM, Peptide Substitution Scan (PEP201752521)	21	10	GVSEWDPILEEAQEM	1745.36	1197.25	548.11	1640.5	1081	559.5
Wild Type Peptide GVSEWDPILEELQEM, Peptide Substitution Scan (PEP201752521)	5	34	GVSEWDPILEEAQEM	1688.15	883.75	804.4	1633	825	808
Wild Type Peptide GVSEWDPILEELQEM, Peptide Substitution Scan (PEP201752521)	5	11	GVSEWDPILEECQEM	3137.82	1002.33	2135.5	3121	936	2185	2317.17	167.556	0.0723105
Wild Type Peptide GVSEWDPILEELQEM, Peptide Substitution Scan (PEP201752521)	21	11	GVSEWDPILEECQEM	3683.97	1197.25	2486.72	3649.5	1081	2568.5
Wild Type Peptide GVSEWDPILEELQEM, Peptide Substitution Scan (PEP201752521)	5	35	GVSEWDPILEECQEM	3009.45	883.75	2125.7	3023	825	2198
Wild Type Peptide GVSEWDPILEELQEM, Peptide Substitution Scan (PEP201752521)	5	12	GVSEWDPILEEDQEM	2812.92	1002.33	1810.59	2855	936	1919	2129.5	244	0.114581
Wild Type Peptide GVSEWDPILEELQEM, Peptide Substitution Scan (PEP201752521)	21	12	GVSEWDPILEEDQEM	3794	1197.25	2596.75	3576.5	1081	2495.5
Wild Type Peptide GVSEWDPILEELQEM, Peptide Substitution Scan (PEP201752521)	5	36	GVSEWDPILEEDQEM	2784.43	883.75	1900.68	2799	825	1974
Wild Type Peptide GVSEWDPILEELQEM, Peptide Substitution Scan (PEP201752521)	5	13	GVSEWDPILEEEQEM	2963.46	1002.33	1961.14	2958.5	936	2022.5	2443.83	280.889	0.114938
Wild Type Peptide GVSEWDPILEELQEM, Peptide Substitution Scan (PEP201752521)	21	13	GVSEWDPILEEEQEM	3820.17	1197.25	2622.92	3830	1081	2749
Wild Type Peptide GVSEWDPILEELQEM, Peptide Substitution Scan (PEP201752521)	5	37	GVSEWDPILEEEQEM	3982.33	883.75	3098.58	3385	825	2560
Wild Type Peptide GVSEWDPILEELQEM, Peptide Substitution Scan (PEP201752521)	5	14	GVSEWDPILEEFQEM	5672.6	1002.33	4670.27	5881.5	936	4945.5	5127.83	322.111	0.0628162
Wild Type Peptide GVSEWDPILEELQEM, Peptide Substitution Scan (PEP201752521)	21	14	GVSEWDPILEEFQEM	6271.96	1197.25	5074.72	6692	1081	5611
Wild Type Peptide GVSEWDPILEELQEM, Peptide Substitution Scan (PEP201752521)	5	38	GVSEWDPILEEFQEM	5673.3	883.75	4789.56	5652	825	4827
Wild Type Peptide GVSEWDPILEELQEM, Peptide Substitution Scan (PEP201752521)	5	15	GVSEWDPILEEGQEM	1405.61	1002.33	403.28	1339	936	403	409.333	46.4444	0.113464
Wild Type Peptide GVSEWDPILEELQEM, Peptide Substitution Scan (PEP201752521)	21	15	GVSEWDPILEEGQEM	1429.06	1197.25	231.81	1427	1081	346
Wild Type Peptide GVSEWDPILEELQEM, Peptide Substitution Scan (PEP201752521)	5	39	GVSEWDPILEEGQEM	1284.24	883.75	400.49	1304	825	479
Wild Type Peptide GVSEWDPILEELQEM, Peptide Substitution Scan (PEP201752521)	5	16	GVSEWDPILEEHQEM	1689.26	1002.33	686.93	1696	936	760	665	72.6667	0.109273
Wild Type Peptide GVSEWDPILEELQEM, Peptide Substitution Scan (PEP201752521)	21	16	GVSEWDPILEEHQEM	1846.07	1197.25	648.83	1760	1081	679
Wild Type Peptide GVSEWDPILEELQEM, Peptide Substitution Scan (PEP201752521)	5	40	GVSEWDPILEEHQEM	1380.25	883.75	496.5	1381	825	556
Wild Type Peptide GVSEWDPILEELQEM, Peptide Substitution Scan (PEP201752521)	5	17	GVSEWDPILEEIQEM	1984.24	1002.33	981.91	1972	936	1036	1038.17	269.556	0.259646
Wild Type Peptide GVSEWDPILEELQEM, Peptide Substitution Scan (PEP201752521)	21	17	GVSEWDPILEEIQEM	2547.25	1197.25	1350	2523.5	1081	1442.5
Wild Type Peptide GVSEWDPILEELQEM, Peptide Substitution Scan (PEP201752521)	5	41	GVSEWDPILEEIQEM	1512.44	883.75	628.69	1461	825	636
Wild Type Peptide GVSEWDPILEELQEM, Peptide Substitution Scan (PEP201752521)	5	30	GVSEWDPILEEZQEM	1803	1002.33	800.67	1824	936	888	667.333	149.556	0.224109
Wild Type Peptide GVSEWDPILEELQEM, Peptide Substitution Scan (PEP201752521)	21	30	GVSEWDPILEEZQEM	1490.96	1197.25	293.71	1524	1081	443
Wild Type Peptide GVSEWDPILEELQEM, Peptide Substitution Scan (PEP201752521)	5	54	GVSEWDPILEEZQEM	1553.57	883.75	669.82	1496	825	671
Wild Type Peptide GVSEWDPILEELQEM, Peptide Substitution Scan (PEP201752521)	5	18	GVSEWDPILEEKQEM	1371.21	1002.33	368.88	1251	936	315	259.333	119.556	0.461011
Wild Type Peptide GVSEWDPILEELQEM, Peptide Substitution Scan (PEP201752521)	21	18	GVSEWDPILEEKQEM	1522.99	1197.25	325.74	1464	1081	383
Wild Type Peptide GVSEWDPILEELQEM, Peptide Substitution Scan (PEP201752521)	5	42	GVSEWDPILEEKQEM	962.04	883.75	78.29	905	825	80
Wild Type Peptide GVSEWDPILEELQEM, Deletion Series (PEP201752521)	18	37	GVSEWDPILEEL	5746.93	825.98	4920.95	5950.5	701	5249.5	5096.83	323.889	0.0635471
Wild Type Peptide GVSEWDPILEELQEM, Deletion Series (PEP201752521)	19	37	GVSEWDPILEEL	5363.26	825.98	4537.27	5312	701	4611
Wild Type Peptide GVSEWDPILEELQEM, Deletion Series (PEP201752521)	20	37	GVSEWDPILEEL	5992.38	825.98	5166.4	6131	701	5430
Wild Type Peptide GVSEWDPILEELQEM, Peptide Substitution Scan (PEP201752521)	4	10	GVSEWDPILEELAEM	1268.33	1002.33	266	1249	936	313	778.333	392.444	0.504211
Wild Type Peptide GVSEWDPILEELQEM, Peptide Substitution Scan (PEP201752521)	20	10	GVSEWDPILEELAEM	2564.41	1197.25	1367.16	2448	1081	1367
Wild Type Peptide GVSEWDPILEELQEM, Peptide Substitution Scan (PEP201752521)	4	34	GVSEWDPILEELAEM	1496.14	883.75	612.39	1480	825	655
Wild Type Peptide GVSEWDPILEELQEM, Peptide Substitution Scan (PEP201752521)	4	11	GVSEWDPILEELCEM	4052.76	1002.33	3050.43	4017	936	3081	3567.83	685.778	0.192211
Wild Type Peptide GVSEWDPILEELQEM, Peptide Substitution Scan (PEP201752521)	20	11	GVSEWDPILEELCEM	5983	1197.25	4785.75	5677.5	1081	4596.5
Wild Type Peptide GVSEWDPILEELQEM, Peptide Substitution Scan (PEP201752521)	4	35	GVSEWDPILEELCEM	3909.34	883.75	3025.59	3851	825	3026
Wild Type Peptide GVSEWDPILEELQEM, Peptide Substitution Scan (PEP201752521)	4	12	GVSEWDPILEELDEM	4648.53	1002.33	3646.2	4529	936	3593	3956.67	366.222	0.0925583
Wild Type Peptide GVSEWDPILEELQEM, Peptide Substitution Scan (PEP201752521)	20	12	GVSEWDPILEELDEM	5501.48	1197.25	4304.24	5587	1081	4506
Wild Type Peptide GVSEWDPILEELQEM, Peptide Substitution Scan (PEP201752521)	4	36	GVSEWDPILEELDEM	4550.69	883.75	3666.94	4596	825	3771
Wild Type Peptide GVSEWDPILEELQEM, Peptide Substitution Scan (PEP201752521)	4	13	GVSEWDPILEELEEM	4901.73	1002.33	3899.4	5053	936	4117	4504.67	275.556	0.0611711
Wild Type Peptide GVSEWDPILEELQEM, Peptide Substitution Scan (PEP201752521)	20	13	GVSEWDPILEELEEM	5981.65	1197.25	4784.4	5999	1081	4918
Wild Type Peptide GVSEWDPILEELQEM, Peptide Substitution Scan (PEP201752521)	4	37	GVSEWDPILEELEEM	5230.5	883.75	4346.75	5304	825	4479
Wild Type Peptide GVSEWDPILEELQEM, Peptide Substitution Scan (PEP201752521)	4	14	GVSEWDPILEELFEM	7454.24	1002.33	6451.92	7933	936	6997	7625.33	1801.11	0.236201
Wild Type Peptide GVSEWDPILEELQEM, Peptide Substitution Scan (PEP201752521)	20	14	GVSEWDPILEELFEM	10944.6	1197.25	9747.34	11408	1081	10327
Wild Type Peptide GVSEWDPILEELQEM, Peptide Substitution Scan (PEP201752521)	4	38	GVSEWDPILEELFEM	6583.02	883.75	5699.27	6377	825	5552
Wild Type Peptide GVSEWDPILEELQEM, Peptide Substitution Scan (PEP201752521)	4	15	GVSEWDPILEELGEM	2140.55	1002.33	1138.22	2146	936	1210	1203.67	167.778	0.139389
Wild Type Peptide GVSEWDPILEELQEM, Peptide Substitution Scan (PEP201752521)	20	15	GVSEWDPILEELGEM	2629.3	1197.25	1432.06	2530	1081	1449
Wild Type Peptide GVSEWDPILEELQEM, Peptide Substitution Scan (PEP201752521)	4	39	GVSEWDPILEELGEM	1688.03	883.75	804.29	1777	825	952
Wild Type Peptide GVSEWDPILEELQEM, Peptide Substitution Scan (PEP201752521)	4	16	GVSEWDPILEELHEM	2499.34	1002.33	1497.01	2434	936	1498	1734.33	544.444	0.313921
Wild Type Peptide GVSEWDPILEELQEM, Peptide Substitution Scan (PEP201752521)	20	16	GVSEWDPILEELHEM	3714.53	1197.25	2517.28	3632	1081	2551
Wild Type Peptide GVSEWDPILEELQEM, Peptide Substitution Scan (PEP201752521)	4	40	GVSEWDPILEELHEM	2000.21	883.75	1116.46	1979	825	1154
Wild Type Peptide GVSEWDPILEELQEM, Peptide Substitution Scan (PEP201752521)	4	17	GVSEWDPILEELIEM	4671.41	1002.33	3669.09	4668	936	3732	3486	249.333	0.0715242
Wild Type Peptide GVSEWDPILEELQEM, Peptide Substitution Scan (PEP201752521)	20	17	GVSEWDPILEELIEM	4722.66	1197.25	3525.42	4695	1081	3614
Wild Type Peptide GVSEWDPILEELQEM, Peptide Substitution Scan (PEP201752521)	4	41	GVSEWDPILEELIEM	3758.64	883.75	2874.89	3937	825	3112
Wild Type Peptide GVSEWDPILEELQEM, Peptide Substitution Scan (PEP201752521)	4	30	GVSEWDPILEELZEM	1996.42	1002.33	994.09	2047	936	1111	981.667	105.778	0.107753
Wild Type Peptide GVSEWDPILEELQEM, Peptide Substitution Scan (PEP201752521)	20	30	GVSEWDPILEELZEM	2074.98	1197.25	877.74	2092	1081	1011
Wild Type Peptide GVSEWDPILEELQEM, Peptide Substitution Scan (PEP201752521)	4	54	GVSEWDPILEELZEM	1674.28	883.75	790.53	1648	825	823
Wild Type Peptide GVSEWDPILEELQEM, Peptide Substitution Scan (PEP201752521)	4	18	GVSEWDPILEELKEM	1315.1	1002.33	312.77	1220	936	284	477.167	128.778	0.26988
Wild Type Peptide GVSEWDPILEELQEM, Peptide Substitution Scan (PEP201752521)	20	18	GVSEWDPILEELKEM	1717	1197.25	519.75	1718.5	1081	637.5
Wild Type Peptide GVSEWDPILEELQEM, Peptide Substitution Scan (PEP201752521)	4	42	GVSEWDPILEELKEM	1391.6	883.75	507.85	1335	825	510
Wild Type Peptide GVSEWDPILEELQEM, Peptide Substitution Scan (PEP201752521)	4	19	GVSEWDPILEELLEM	2785.66	1002.33	1783.33	2786	936	1850	2345.33	330.222	0.1408
Wild Type Peptide GVSEWDPILEELQEM, Peptide Substitution Scan (PEP201752521)	20	19	GVSEWDPILEELLEM	3788.29	1197.25	2591.04	3609	1081	2528
Wild Type Peptide GVSEWDPILEELQEM, Peptide Substitution Scan (PEP201752521)	4	43	GVSEWDPILEELLEM	3322.46	883.75	2438.71	3483	825	2658
Wild Type Peptide GVSEWDPILEELQEM, Peptide Substitution Scan (PEP201752521)	4	20	GVSEWDPILEELMEM	2170.61	1002.33	1168.28	2200	936	1264	1129.17	268.778	0.238032
Wild Type Peptide GVSEWDPILEELQEM, Peptide Substitution Scan (PEP201752521)	20	20	GVSEWDPILEELMEM	2481.53	1197.25	1284.28	2478.5	1081	1397.5
Wild Type Peptide GVSEWDPILEELQEM, Peptide Substitution Scan (PEP201752521)	4	44	GVSEWDPILEELMEM	1689.61	883.75	805.87	1551	825	726
Wild Type Peptide GVSEWDPILEELQEM, Peptide Substitution Scan (PEP201752521)	4	21	GVSEWDPILEELNEM	2679.89	1002.33	1677.56	2599	936	1663	1501.33	284.222	0.189313
Wild Type Peptide GVSEWDPILEELQEM, Peptide Substitution Scan (PEP201752521)	20	21	GVSEWDPILEELNEM	2994.64	1197.25	1797.39	2847	1081	1766
Wild Type Peptide GVSEWDPILEELQEM, Peptide Substitution Scan (PEP201752521)	4	45	GVSEWDPILEELNEM	1851.34	883.75	967.6	1900	825	1075
Wild Type Peptide GVSEWDPILEELQEM, Peptide Substitution Scan (PEP201752521)	4	31	GVSEWDPILEELOEM	2135.23	1002.33	1132.9	2129	936	1193	1388.67	130.444	0.093935
Wild Type Peptide GVSEWDPILEELQEM, Peptide Substitution Scan (PEP201752521)	20	31	GVSEWDPILEELOEM	2441.37	1197.25	1244.12	2490	1081	1409
Wild Type Peptide GVSEWDPILEELQEM, Peptide Substitution Scan (PEP201752521)	4	55	GVSEWDPILEELOEM	2374.72	883.75	1490.97	2389	825	1564
Wild Type Peptide GVSEWDPILEELQEM, Peptide Substitution Scan (PEP201752521)	4	22	GVSEWDPILEELPEM	2451.53	1002.33	1449.2	2370	936	1434	1447.67	366.222	0.252974
Wild Type Peptide GVSEWDPILEELQEM, Peptide Substitution Scan (PEP201752521)	20	22	GVSEWDPILEELPEM	3112.09	1197.25	1914.84	3078	1081	1997
Wild Type Peptide GVSEWDPILEELQEM, Peptide Substitution Scan (PEP201752521)	4	46	GVSEWDPILEELPEM	1774.25	883.75	890.5	1737	825	912
Wild Type Peptide GVSEWDPILEELQEM, Deletion Series (PEP201752521)	18	36	GVSEWDPILEELQ	3692.48	825.98	2866.49	3576	701	2875	3675	673.333	0.18322
Wild Type Peptide GVSEWDPILEELQEM, Deletion Series (PEP201752521)	19	36	GVSEWDPILEELQ	4370.61	825.98	3544.62	4166	701	3465
Wild Type Peptide GVSEWDPILEELQEM, Deletion Series (PEP201752521)	20	36	GVSEWDPILEELQ	5643.03	825.98	4817.04	5386	701	4685
Wild Type Peptide GVSEWDPILEELQEM, Peptide Substitution Scan (PEP201752521)	3	10	GVSEWDPILEELQAM	808.62	1002.33	0	800	936	0	132.167	116.889	0.884405
Wild Type Peptide GVSEWDPILEELQEM, Peptide Substitution Scan (PEP201752521)	19	10	GVSEWDPILEELQAM	1431.26	1197.25	234.01	1388.5	1081	307.5
Wild Type Peptide GVSEWDPILEELQEM, Peptide Substitution Scan (PEP201752521)	3	34	GVSEWDPILEELQAM	900.75	883.75	17	914	825	89
Wild Type Peptide GVSEWDPILEELQEM, Peptide Substitution Scan (PEP201752521)	3	11	GVSEWDPILEELQCM	1519.58	1002.33	517.25	1377	936	441	646.333	155.111	0.239986
Wild Type Peptide GVSEWDPILEELQEM, Peptide Substitution Scan (PEP201752521)	19	11	GVSEWDPILEELQCM	2097.19	1197.25	899.95	1960	1081	879
Wild Type Peptide GVSEWDPILEELQEM, Peptide Substitution Scan (PEP201752521)	3	35	GVSEWDPILEELQCM	1442.31	883.75	558.56	1444	825	619
Wild Type Peptide GVSEWDPILEELQEM, Peptide Substitution Scan (PEP201752521)	3	12	GVSEWDPILEELQDM	2391.66	1002.33	1389.34	2408	936	1472	1247.33	342.889	0.274898
Wild Type Peptide GVSEWDPILEELQEM, Peptide Substitution Scan (PEP201752521)	19	12	GVSEWDPILEELQDM	2753.69	1197.25	1556.45	2618	1081	1537
Wild Type Peptide GVSEWDPILEELQEM, Peptide Substitution Scan (PEP201752521)	3	36	GVSEWDPILEELQDM	1586.7	883.75	702.96	1558	825	733
Wild Type Peptide GVSEWDPILEELQEM, Deletion Series (PEP201752521)	18	35	GVSEWDPILEELQE	5099.96	825.98	4273.97	5139	701	4438	3984	302.667	0.0759705
Wild Type Peptide GVSEWDPILEELQEM, Deletion Series (PEP201752521)	19	35	GVSEWDPILEELQE	4354.37	825.98	3528.39	4416	701	3715
Wild Type Peptide GVSEWDPILEELQEM, Deletion Series (PEP201752521)	20	35	GVSEWDPILEELQE	4483.74	825.98	3657.76	4500	701	3799
Wild Type Peptide GVSEWDPILEELQEM, Peptide Substitution Scan (PEP201752521)	2	10	GVSEWDPILEELQEA	1623.09	1002.33	620.77	1625	936	689	1021.67	432.889	0.423709
Wild Type Peptide GVSEWDPILEELQEM, Peptide Substitution Scan (PEP201752521)	18	10	GVSEWDPILEELQEA	2838.89	1197.25	1641.64	2752	1081	1671
Wild Type Peptide GVSEWDPILEELQEM, Peptide Substitution Scan (PEP201752521)	2	34	GVSEWDPILEELQEA	1527.52	883.75	643.77	1530	825	705
Wild Type Peptide GVSEWDPILEELQEM, Peptide Substitution Scan (PEP201752521)	2	11	GVSEWDPILEELQEC	2789.16	1002.33	1786.83	2484	936	1548	2795.33	1053.11	0.376739
Wild Type Peptide GVSEWDPILEELQEM, Peptide Substitution Scan (PEP201752521)	18	11	GVSEWDPILEELQEC	5480.56	1197.25	4283.31	5456	1081	4375
Wild Type Peptide GVSEWDPILEELQEM, Peptide Substitution Scan (PEP201752521)	2	35	GVSEWDPILEELQEC	3466.34	883.75	2582.59	3288	825	2463
Wild Type Peptide GVSEWDPILEELQEM, Peptide Substitution Scan (PEP201752521)	2	12	GVSEWDPILEELQED	3346.98	1002.33	2344.65	3229	936	2293	2930	668.667	0.228214
Wild Type Peptide GVSEWDPILEELQEM, Peptide Substitution Scan (PEP201752521)	18	12	GVSEWDPILEELQED	5794.74	1197.25	4597.49	5014	1081	3933
Wild Type Peptide GVSEWDPILEELQEM, Peptide Substitution Scan (PEP201752521)	2	36	GVSEWDPILEELQED	3424.05	883.75	2540.3	3389	825	2564
Wild Type Peptide GVSEWDPILEELQEM, Peptide Substitution Scan (PEP201752521)	2	13	GVSEWDPILEELQEE	3212.68	1002.33	2210.35	2992	936	2056	3245	994.667	0.306523
Wild Type Peptide GVSEWDPILEELQEM, Peptide Substitution Scan (PEP201752521)	18	13	GVSEWDPILEELQEE	6022.55	1197.25	4825.3	5818	1081	4737
Wild Type Peptide GVSEWDPILEELQEM, Peptide Substitution Scan (PEP201752521)	2	37	GVSEWDPILEELQEE	3742.17	883.75	2858.43	3767	825	2942
Wild Type Peptide GVSEWDPILEELQEM, Peptide Substitution Scan (PEP201752521)	2	14	GVSEWDPILEELQEF	4681.9	1002.33	3679.57	4636	936	3700	5557.67	1761.56	0.31696
Wild Type Peptide GVSEWDPILEELQEM, Peptide Substitution Scan (PEP201752521)	18	14	GVSEWDPILEELQEF	9092.78	1197.25	7895.53	9281	1081	8200
Wild Type Peptide GVSEWDPILEELQEM, Peptide Substitution Scan (PEP201752521)	2	38	GVSEWDPILEELQEF	5508.37	883.75	4624.62	5598	825	4773
Wild Type Peptide GVSEWDPILEELQEM, Peptide Substitution Scan (PEP201752521)	2	15	GVSEWDPILEELQEG	859.53	1002.33	0	810	936	0	272.333	249.778	0.917177
Wild Type Peptide GVSEWDPILEELQEM, Peptide Substitution Scan (PEP201752521)	18	15	GVSEWDPILEELQEG	1812.66	1197.25	615.41	1728	1081	647
Wild Type Peptide GVSEWDPILEELQEM, Peptide Substitution Scan (PEP201752521)	2	39	GVSEWDPILEELQEG	1028.56	883.75	144.81	995	825	170
Wild Type Peptide GVSEWDPILEELQEM, Peptide Substitution Scan (PEP201752521)	2	16	GVSEWDPILEELQEH	2244.69	1002.33	1242.36	1781.5	936	845.5	1471.17	599.889	0.407764
Wild Type Peptide GVSEWDPILEELQEM, Peptide Substitution Scan (PEP201752521)	18	16	GVSEWDPILEELQEH	3688.52	1197.25	2491.27	3452	1081	2371
Wild Type Peptide GVSEWDPILEELQEM, Peptide Substitution Scan (PEP201752521)	2	40	GVSEWDPILEELQEH	2004.08	883.75	1120.33	2022	825	1197
Wild Type Peptide GVSEWDPILEELQEM, Peptide Substitution Scan (PEP201752521)	2	17	GVSEWDPILEELQEI	3912.75	1002.33	2910.42	3525	936	2589	2835	492	0.173545
Wild Type Peptide GVSEWDPILEELQEM, Peptide Substitution Scan (PEP201752521)	18	17	GVSEWDPILEELQEI	4752.03	1197.25	3554.78	4654	1081	3573
Wild Type Peptide GVSEWDPILEELQEM, Peptide Substitution Scan (PEP201752521)	2	41	GVSEWDPILEELQEI	3190.73	883.75	2306.98	3168	825	2343
Wild Type Peptide GVSEWDPILEELQEM, Peptide Substitution Scan (PEP201752521)	2	30	GVSEWDPILEELQEZ	1281.48	1002.33	279.15	1204	936	268	526	264	0.501901
Wild Type Peptide GVSEWDPILEELQEM, Peptide Substitution Scan (PEP201752521)	18	30	GVSEWDPILEELQEZ	1958.37	1197.25	761.12	2003	1081	922
Wild Type Peptide GVSEWDPILEELQEM, Peptide Substitution Scan (PEP201752521)	2	54	GVSEWDPILEELQEZ	1211.78	883.75	328.03	1213	825	388
Wild Type Peptide GVSEWDPILEELQEM, Peptide Substitution Scan (PEP201752521)	2	18	GVSEWDPILEELQEK	971.97	1002.33	0	906	936	0	233.667	196.889	0.842606
Wild Type Peptide GVSEWDPILEELQEM, Peptide Substitution Scan (PEP201752521)	18	18	GVSEWDPILEELQEK	1613.02	1197.25	415.77	1610	1081	529
Wild Type Peptide GVSEWDPILEELQEM, Peptide Substitution Scan (PEP201752521)	2	42	GVSEWDPILEELQEK	1120.53	883.75	236.78	997	825	172
Wild Type Peptide GVSEWDPILEELQEM, Peptide Substitution Scan (PEP201752521)	2	19	GVSEWDPILEELQEL	1829.99	1002.33	827.67	1816	936	880	1890.67	673.778	0.35637
Wild Type Peptide GVSEWDPILEELQEM, Peptide Substitution Scan (PEP201752521)	18	19	GVSEWDPILEELQEL	3874.8	1197.25	2677.55	3895	1081	2814
Wild Type Peptide GVSEWDPILEELQEM, Peptide Substitution Scan (PEP201752521)	2	43	GVSEWDPILEELQEL	2835.97	883.75	1952.22	2803	825	1978
Wild Type Peptide GVSEWDPILEELQEM, Deletion Series (PEP201752521)	18	34	GVSEWDPILEELQEM	1924.75	825.98	1098.77	1851.5	701	1150.5	1347.5	353.059	0.26201
Wild Type Peptide GVSEWDPILEELQEM, Deletion Series (PEP201752521)	18	49	GVSEWDPILEELQEM	2636.6	825.98	1810.61	2417	701	1716
Wild Type Peptide GVSEWDPILEELQEM, Deletion Series (PEP201752521)	19	34	GVSEWDPILEELQEM	2469.81	825.98	1643.82	2356	701	1655
Wild Type Peptide GVSEWDPILEELQEM, Deletion Series (PEP201752521)	19	49	GVSEWDPILEELQEM	2471.9	825.98	1645.92	2401.5	701	1700.5
Wild Type Peptide GVSEWDPILEELQEM, Deletion Series (PEP201752521)	20	34	GVSEWDPILEELQEM	2587.35	825.98	1761.37	2430.5	701	1729.5
Wild Type Peptide GVSEWDPILEELQEM, Deletion Series (PEP201752521)	20	49	GVSEWDPILEELQEM	2234.98	825.98	1409	2296	701	1595
Wild Type Peptide GVSEWDPILEELQEM, Peptide Substitution Scan (PEP201752521)	2	20	GVSEWDPILEELQEM	1294.95	1002.33	292.62	1236	936	300
Wild Type Peptide GVSEWDPILEELQEM, Peptide Substitution Scan (PEP201752521)	3	13	GVSEWDPILEELQEM	2015.49	1002.33	1013.17	2089	936	1153
Wild Type Peptide GVSEWDPILEELQEM, Peptide Substitution Scan (PEP201752521)	4	23	GVSEWDPILEELQEM	1992.33	1002.33	990	2024	936	1088
Wild Type Peptide GVSEWDPILEELQEM, Peptide Substitution Scan (PEP201752521)	5	19	GVSEWDPILEELQEM	2158.94	1002.33	1156.62	2197	936	1261
Wild Type Peptide GVSEWDPILEELQEM, Peptide Substitution Scan (PEP201752521)	6	13	GVSEWDPILEELQEM	1798.21	1002.33	795.89	1712	936	776
Wild Type Peptide GVSEWDPILEELQEM, Peptide Substitution Scan (PEP201752521)	7	13	GVSEWDPILEELQEM	2019.95	1002.33	1017.62	1988	936	1052
Wild Type Peptide GVSEWDPILEELQEM, Peptide Substitution Scan (PEP201752521)	8	19	GVSEWDPILEELQEM	2052.34	1002.33	1050.02	2104	936	1168
Wild Type Peptide GVSEWDPILEELQEM, Peptide Substitution Scan (PEP201752521)	9	17	GVSEWDPILEELQEM	2300.88	1002.33	1298.55	2387	936	1451
Wild Type Peptide GVSEWDPILEELQEM, Peptide Substitution Scan (PEP201752521)	10	22	GVSEWDPILEELQEM	1894.07	1002.33	891.75	1835	936	899
Wild Type Peptide GVSEWDPILEELQEM, Peptide Substitution Scan (PEP201752521)	11	12	GVSEWDPILEELQEM	2098.06	1002.33	1095.73	2057	936	1121
Wild Type Peptide GVSEWDPILEELQEM, Peptide Substitution Scan (PEP201752521)	12	28	GVSEWDPILEELQEM	1589.65	1002.33	587.32	1636.5	936	700.5
Wild Type Peptide GVSEWDPILEELQEM, Peptide Substitution Scan (PEP201752521)	13	13	GVSEWDPILEELQEM	2634.98	1002.33	1632.66	2650.5	936	1714.5
Wild Type Peptide GVSEWDPILEELQEM, Peptide Substitution Scan (PEP201752521)	14	25	GVSEWDPILEELQEM	2009.2	1002.33	1006.88	1958	936	1022
Wild Type Peptide GVSEWDPILEELQEM, Peptide Substitution Scan (PEP201752521)	15	27	GVSEWDPILEELQEM	2009.94	1002.33	1007.62	1999	936	1063
Wild Type Peptide GVSEWDPILEELQEM, Peptide Substitution Scan (PEP201752521)	16	15	GVSEWDPILEELQEM	2693.95	1002.33	1691.62	2717	936	1781
Wild Type Peptide GVSEWDPILEELQEM, Peptide Substitution Scan (PEP201752521)	18	20	GVSEWDPILEELQEM	2181.41	1197.25	984.16	2215	1081	1134
Wild Type Peptide GVSEWDPILEELQEM, Peptide Substitution Scan (PEP201752521)	19	13	GVSEWDPILEELQEM	2945.07	1197.25	1747.82	3013	1081	1932
Wild Type Peptide GVSEWDPILEELQEM, Peptide Substitution Scan (PEP201752521)	20	23	GVSEWDPILEELQEM	2409.02	1197.25	1211.77	2354.5	1081	1273.5
Wild Type Peptide GVSEWDPILEELQEM, Peptide Substitution Scan (PEP201752521)	21	19	GVSEWDPILEELQEM	2380.39	1197.25	1183.14	2337	1081	1256
Wild Type Peptide GVSEWDPILEELQEM, Peptide Substitution Scan (PEP201752521)	22	13	GVSEWDPILEELQEM	2688.67	1197.25	1491.42	2522.5	1081	1441.5
Wild Type Peptide GVSEWDPILEELQEM, Peptide Substitution Scan (PEP201752521)	23	13	GVSEWDPILEELQEM	2882.56	1197.25	1685.31	3010.5	1081	1929.5
Wild Type Peptide GVSEWDPILEELQEM, Peptide Substitution Scan (PEP201752521)	24	19	GVSEWDPILEELQEM	2428.82	1197.25	1231.57	2239	1081	1158
Wild Type Peptide GVSEWDPILEELQEM, Peptide Substitution Scan (PEP201752521)	25	17	GVSEWDPILEELQEM	2419.28	1197.25	1222.03	2476.5	1081	1395.5
Wild Type Peptide GVSEWDPILEELQEM, Peptide Substitution Scan (PEP201752521)	26	22	GVSEWDPILEELQEM	2838.75	1197.25	1641.5	2868	1081	1787
Wild Type Peptide GVSEWDPILEELQEM, Peptide Substitution Scan (PEP201752521)	27	12	GVSEWDPILEELQEM	3016.53	1197.25	1819.28	3015	1081	1934
Wild Type Peptide GVSEWDPILEELQEM, Peptide Substitution Scan (PEP201752521)	28	28	GVSEWDPILEELQEM	2305.86	1197.25	1108.62	2324	1081	1243
Wild Type Peptide GVSEWDPILEELQEM, Peptide Substitution Scan (PEP201752521)	29	13	GVSEWDPILEELQEM	3149.88	1197.25	1952.63	3122	1081	2041
Wild Type Peptide GVSEWDPILEELQEM, Peptide Substitution Scan (PEP201752521)	30	25	GVSEWDPILEELQEM	2808.53	1197.25	1611.28	2685	1081	1604
Wild Type Peptide GVSEWDPILEELQEM, Peptide Substitution Scan (PEP201752521)	31	27	GVSEWDPILEELQEM	2984.86	1197.25	1787.61	3023	1081	1942
Wild Type Peptide GVSEWDPILEELQEM, Peptide Substitution Scan (PEP201752521)	32	15	GVSEWDPILEELQEM	3892.16	1197.25	2694.92	4021.5	1081	2940.5
Wild Type Peptide GVSEWDPILEELQEM, Peptide Substitution Scan (PEP201752521)	2	44	GVSEWDPILEELQEM	1613.67	883.75	729.92	1500	825	675
Wild Type Peptide GVSEWDPILEELQEM, Peptide Substitution Scan (PEP201752521)	3	37	GVSEWDPILEELQEM	1238.9	883.75	355.15	1180	825	355
Wild Type Peptide GVSEWDPILEELQEM, Peptide Substitution Scan (PEP201752521)	4	47	GVSEWDPILEELQEM	1286.92	883.75	403.17	1276	825	451
Wild Type Peptide GVSEWDPILEELQEM, Peptide Substitution Scan (PEP201752521)	5	43	GVSEWDPILEELQEM	1705.73	883.75	821.98	1634.5	825	809.5
Wild Type Peptide GVSEWDPILEELQEM, Peptide Substitution Scan (PEP201752521)	6	37	GVSEWDPILEELQEM	2287.14	883.75	1403.39	2264	825	1439
Wild Type Peptide GVSEWDPILEELQEM, Peptide Substitution Scan (PEP201752521)	7	37	GVSEWDPILEELQEM	2308.01	883.75	1424.26	2303	825	1478
Wild Type Peptide GVSEWDPILEELQEM, Peptide Substitution Scan (PEP201752521)	8	43	GVSEWDPILEELQEM	2070.54	883.75	1186.79	2082	825	1257
Wild Type Peptide GVSEWDPILEELQEM, Peptide Substitution Scan (PEP201752521)	9	41	GVSEWDPILEELQEM	2496.6	883.75	1612.85	2442	825	1617
Wild Type Peptide GVSEWDPILEELQEM, Peptide Substitution Scan (PEP201752521)	10	46	GVSEWDPILEELQEM	2358.73	883.75	1474.98	2276	825	1451
Wild Type Peptide GVSEWDPILEELQEM, Peptide Substitution Scan (PEP201752521)	11	36	GVSEWDPILEELQEM	2097.32	883.75	1213.57	1984	825	1159
Wild Type Peptide GVSEWDPILEELQEM, Peptide Substitution Scan (PEP201752521)	12	52	GVSEWDPILEELQEM	2520.07	883.75	1636.32	2473	825	1648
Wild Type Peptide GVSEWDPILEELQEM, Peptide Substitution Scan (PEP201752521)	13	37	GVSEWDPILEELQEM	2077.46	883.75	1193.71	2043	825	1218
Wild Type Peptide GVSEWDPILEELQEM, Peptide Substitution Scan (PEP201752521)	14	49	GVSEWDPILEELQEM	2087.65	883.75	1203.9	2114	825	1289
Wild Type Peptide GVSEWDPILEELQEM, Peptide Substitution Scan (PEP201752521)	15	51	GVSEWDPILEELQEM	2206.39	883.75	1322.65	2235	825	1410
Wild Type Peptide GVSEWDPILEELQEM, Peptide Substitution Scan (PEP201752521)	16	39	GVSEWDPILEELQEM	2231.26	883.75	1347.52	2183	825	1358
Wild Type Peptide GVSEWDPILEELQEM, Peptide Substitution Scan (PEP201752521)	2	21	GVSEWDPILEELQEN	1330.48	1002.33	328.16	1262	936	326	992.333	444.222	0.447654
Wild Type Peptide GVSEWDPILEELQEM, Peptide Substitution Scan (PEP201752521)	18	21	GVSEWDPILEELQEN	2438.47	1197.25	1241.23	2487	1081	1406
Wild Type Peptide GVSEWDPILEELQEM, Peptide Substitution Scan (PEP201752521)	2	45	GVSEWDPILEELQEN	2012.8	883.75	1129.05	2070	825	1245
Wild Type Peptide GVSEWDPILEELQEM, Peptide Substitution Scan (PEP201752521)	2	31	GVSEWDPILEELQEO	1422.23	1002.33	419.9	1427.5	936	491.5	603.833	175.444	0.290551
Wild Type Peptide GVSEWDPILEELQEM, Peptide Substitution Scan (PEP201752521)	18	31	GVSEWDPILEELQEO	2020.26	1197.25	823.01	1948	1081	867
Wild Type Peptide GVSEWDPILEELQEM, Peptide Substitution Scan (PEP201752521)	2	55	GVSEWDPILEELQEO	1290.11	883.75	406.37	1278	825	453
Wild Type Peptide GVSEWDPILEELQEM, Peptide Substitution Scan (PEP201752521)	2	22	GVSEWDPILEELQEP	1409.77	1002.33	407.44	1287	936	351	856	412	0.481308
Wild Type Peptide GVSEWDPILEELQEM, Peptide Substitution Scan (PEP201752521)	18	22	GVSEWDPILEELQEP	2509.7	1197.25	1312.45	2555	1081	1474
Wild Type Peptide GVSEWDPILEELQEM, Peptide Substitution Scan (PEP201752521)	2	46	GVSEWDPILEELQEP	1716.84	883.75	833.09	1568	825	743
Wild Type Peptide GVSEWDPILEELQEM, Peptide Substitution Scan (PEP201752521)	2	23	GVSEWDPILEELQEQ	1136.99	1002.33	134.67	1110	936	174	707.5	355.667	0.502709
Wild Type Peptide GVSEWDPILEELQEM, Peptide Substitution Scan (PEP201752521)	18	23	GVSEWDPILEELQEQ	2710.84	1197.25	1513.59	2233	1081	1152
Wild Type Peptide GVSEWDPILEELQEM, Peptide Substitution Scan (PEP201752521)	2	47	GVSEWDPILEELQEQ	1740.87	883.75	857.12	1621.5	825	796.5
Wild Type Peptide GVSEWDPILEELQEM, Peptide Substitution Scan (PEP201752521)	2	24	GVSEWDPILEELQER	1656.53	1002.33	654.2	1673	936	737	1052	277.333	0.263625
Wild Type Peptide GVSEWDPILEELQEM, Peptide Substitution Scan (PEP201752521)	18	24	GVSEWDPILEELQER	2618.76	1197.25	1421.52	2549	1081	1468
Wild Type Peptide GVSEWDPILEELQEM, Peptide Substitution Scan (PEP201752521)	2	48	GVSEWDPILEELQER	1760.6	883.75	876.85	1776	825	951
Wild Type Peptide GVSEWDPILEELQEM, Peptide Substitution Scan (PEP201752521)	2	25	GVSEWDPILEELQES	1883.18	1002.33	880.85	1742	936	806	1163.83	238.556	0.204974
Wild Type Peptide GVSEWDPILEELQEM, Peptide Substitution Scan (PEP201752521)	18	25	GVSEWDPILEELQES	2488.01	1197.25	1290.77	2557	1081	1476
Wild Type Peptide GVSEWDPILEELQEM, Peptide Substitution Scan (PEP201752521)	2	49	GVSEWDPILEELQES	2075.78	883.75	1192.03	2034.5	825	1209.5
Wild Type Peptide GVSEWDPILEELQEM, Peptide Substitution Scan (PEP201752521)	2	26	GVSEWDPILEELQET	1867.78	1002.33	865.45	1787	936	851	1106	170	0.153707
Wild Type Peptide GVSEWDPILEELQEM, Peptide Substitution Scan (PEP201752521)	18	26	GVSEWDPILEELQET	2323.03	1197.25	1125.78	2410	1081	1329
Wild Type Peptide GVSEWDPILEELQEM, Peptide Substitution Scan (PEP201752521)	2	50	GVSEWDPILEELQET	1927.14	883.75	1043.39	1963	825	1138
Wild Type Peptide GVSEWDPILEELQEM, Peptide Substitution Scan (PEP201752521)	2	32	GVSEWDPILEELQEU	2792.15	1002.33	1789.83	2150	936	1214	1038.5	220.667	0.212486
Wild Type Peptide GVSEWDPILEELQEM, Peptide Substitution Scan (PEP201752521)	18	32	GVSEWDPILEELQEU	2416.63	1197.25	1219.38	2275	1081	1194
Wild Type Peptide GVSEWDPILEELQEM, Peptide Substitution Scan (PEP201752521)	2	56	GVSEWDPILEELQEU	1671.42	883.75	787.67	1532.5	825	707.5
Wild Type Peptide GVSEWDPILEELQEM, Peptide Substitution Scan (PEP201752521)	2	27	GVSEWDPILEELQEV	2672.25	1002.33	1669.92	2448	936	1512	1855.33	283.111	0.152593
Wild Type Peptide GVSEWDPILEELQEM, Peptide Substitution Scan (PEP201752521)	18	27	GVSEWDPILEELQEV	3366.64	1197.25	2169.39	3361	1081	2280
Wild Type Peptide GVSEWDPILEELQEM, Peptide Substitution Scan (PEP201752521)	2	51	GVSEWDPILEELQEV	2429.03	883.75	1545.29	2599	825	1774
Wild Type Peptide GVSEWDPILEELQEM, Peptide Substitution Scan (PEP201752521)	2	28	GVSEWDPILEELQEW	3425.26	1002.33	2422.93	3259	936	2323	2432.67	156.222	0.0642185
Wild Type Peptide GVSEWDPILEELQEM, Peptide Substitution Scan (PEP201752521)	18	28	GVSEWDPILEELQEW	3819.4	1197.25	2622.15	3389	1081	2308
Wild Type Peptide GVSEWDPILEELQEM, Peptide Substitution Scan (PEP201752521)	2	52	GVSEWDPILEELQEW	3501.95	883.75	2618.2	3492	825	2667
Wild Type Peptide GVSEWDPILEELQEM, Peptide Substitution Scan (PEP201752521)	2	29	GVSEWDPILEELQEY	5051.23	1002.33	4048.9	5109.5	936	4173.5	5645.83	1259.11	0.223016
Wild Type Peptide GVSEWDPILEELQEM, Peptide Substitution Scan (PEP201752521)	18	29	GVSEWDPILEELQEY	8189.03	1197.25	6991.78	8615.5	1081	7534.5
Wild Type Peptide GVSEWDPILEELQEM, Peptide Substitution Scan (PEP201752521)	2	53	GVSEWDPILEELQEY	6180.5	883.75	5296.75	6054.5	825	5229.5
Wild Type Peptide GVSEWDPILEELQEM, Peptide Substitution Scan (PEP201752521)	3	14	GVSEWDPILEELQFM	1429.26	1002.33	426.93	1297	936	361	895.5	705	0.78727
Wild Type Peptide GVSEWDPILEELQEM, Peptide Substitution Scan (PEP201752521)	19	14	GVSEWDPILEELQFM	2980.37	1197.25	1783.12	3034	1081	1953
Wild Type Peptide GVSEWDPILEELQEM, Peptide Substitution Scan (PEP201752521)	3	38	GVSEWDPILEELQFM	1244.98	883.75	361.24	1197.5	825	372.5
Wild Type Peptide GVSEWDPILEELQEM, Peptide Substitution Scan (PEP201752521)	3	15	GVSEWDPILEELQGM	847.47	1002.33	0	850	936	0	61	81.3333	1.33333
Wild Type Peptide GVSEWDPILEELQEM, Peptide Substitution Scan (PEP201752521)	19	15	GVSEWDPILEELQGM	1284.59	1197.25	87.34	1264	1081	183
Wild Type Peptide GVSEWDPILEELQEM, Peptide Substitution Scan (PEP201752521)	3	39	GVSEWDPILEELQGM	779.02	883.75	0	749	825	0
Wild Type Peptide GVSEWDPILEELQEM, Peptide Substitution Scan (PEP201752521)	3	16	GVSEWDPILEELQHM	1211.24	1002.33	208.92	1180	936	244	257.333	85.1111	0.330743
Wild Type Peptide GVSEWDPILEELQEM, Peptide Substitution Scan (PEP201752521)	19	16	GVSEWDPILEELQHM	1579.53	1197.25	382.28	1466	1081	385
Wild Type Peptide GVSEWDPILEELQEM, Peptide Substitution Scan (PEP201752521)	3	40	GVSEWDPILEELQHM	1038.05	883.75	154.3	968	825	143
Wild Type Peptide GVSEWDPILEELQEM, Peptide Substitution Scan (PEP201752521)	3	17	GVSEWDPILEELQIM	1421.26	1002.33	418.93	1413	936	477	598.667	284.222	0.474759
Wild Type Peptide GVSEWDPILEELQEM, Peptide Substitution Scan (PEP201752521)	19	17	GVSEWDPILEELQIM	2026.98	1197.25	829.74	2106	1081	1025
Wild Type Peptide GVSEWDPILEELQEM, Peptide Substitution Scan (PEP201752521)	3	41	GVSEWDPILEELQIM	1076.48	883.75	192.74	1119	825	294
Wild Type Peptide GVSEWDPILEELQEM, Peptide Substitution Scan (PEP201752521)	3	30	GVSEWDPILEELQZM	974.59	1002.33	0	961	936	25	8.33333	11.1111	1.33333
Wild Type Peptide GVSEWDPILEELQEM, Peptide Substitution Scan (PEP201752521)	19	30	GVSEWDPILEELQZM	1093.95	1197.25	0	1052	1081	0
Wild Type Peptide GVSEWDPILEELQEM, Peptide Substitution Scan (PEP201752521)	3	54	GVSEWDPILEELQZM	786.05	883.75	0	766	825	0
Wild Type Peptide GVSEWDPILEELQEM, Peptide Substitution Scan (PEP201752521)	3	18	GVSEWDPILEELQKM	775.95	1002.33	0	759	936	0	13.1667	17.5556	1.33333
Wild Type Peptide GVSEWDPILEELQEM, Peptide Substitution Scan (PEP201752521)	19	18	GVSEWDPILEELQKM	993.49	1197.25	0	1003	1081	0
Wild Type Peptide GVSEWDPILEELQEM, Peptide Substitution Scan (PEP201752521)	3	42	GVSEWDPILEELQKM	1301.5	883.75	417.75	864.5	825	39.5
Wild Type Peptide GVSEWDPILEELQEM, Peptide Substitution Scan (PEP201752521)	3	19	GVSEWDPILEELQLM	1106.27	1002.33	103.94	1017	936	81	218.667	108.222	0.494919
Wild Type Peptide GVSEWDPILEELQEM, Peptide Substitution Scan (PEP201752521)	19	19	GVSEWDPILEELQLM	1629.4	1197.25	432.15	1462	1081	381
Wild Type Peptide GVSEWDPILEELQEM, Peptide Substitution Scan (PEP201752521)	3	43	GVSEWDPILEELQLM	1015.91	883.75	132.17	1019	825	194
Wild Type Peptide GVSEWDPILEELQEM, Peptide Substitution Scan (PEP201752521)	3	20	GVSEWDPILEELQMM	939.25	1002.33	0	919	936	0	169	112.667	0.666667
Wild Type Peptide GVSEWDPILEELQEM, Peptide Substitution Scan (PEP201752521)	19	20	GVSEWDPILEELQMM	1472.32	1197.25	275.07	1397	1081	316
Wild Type Peptide GVSEWDPILEELQEM, Peptide Substitution Scan (PEP201752521)	3	44	GVSEWDPILEELQMM	1089.32	883.75	205.57	1016	825	191
Wild Type Peptide GVSEWDPILEELQEM, Peptide Substitution Scan (PEP201752521)	3	21	GVSEWDPILEELQNM	1099.04	1002.33	96.71	1096	936	160	229.667	59.5556	0.259313
Wild Type Peptide GVSEWDPILEELQEM, Peptide Substitution Scan (PEP201752521)	19	21	GVSEWDPILEELQNM	1383.49	1197.25	186.24	1400	1081	319
Wild Type Peptide GVSEWDPILEELQEM, Peptide Substitution Scan (PEP201752521)	3	45	GVSEWDPILEELQNM	1047.47	883.75	163.72	1035	825	210
Wild Type Peptide GVSEWDPILEELQEM, Peptide Substitution Scan (PEP201752521)	3	31	GVSEWDPILEELQOM	1084.5	1002.33	82.18	1022	936	86	171.333	95.7778	0.559014
Wild Type Peptide GVSEWDPILEELQEM, Peptide Substitution Scan (PEP201752521)	19	31	GVSEWDPILEELQOM	1483.77	1197.25	286.53	1396	1081	315
Wild Type Peptide GVSEWDPILEELQEM, Peptide Substitution Scan (PEP201752521)	3	55	GVSEWDPILEELQOM	919.1	883.75	35.35	938	825	113
Wild Type Peptide GVSEWDPILEELQEM, Peptide Substitution Scan (PEP201752521)	3	22	GVSEWDPILEELQPM	1290.41	1002.33	288.08	1337	936	401	275.667	168.444	0.611044
Wild Type Peptide GVSEWDPILEELQEM, Peptide Substitution Scan (PEP201752521)	19	22	GVSEWDPILEELQPM	1465.64	1197.25	268.39	1484	1081	403
Wild Type Peptide GVSEWDPILEELQEM, Peptide Substitution Scan (PEP201752521)	3	46	GVSEWDPILEELQPM	870.78	883.75	0	848	825	23
Wild Type Peptide GVSEWDPILEELQEM, Peptide Substitution Scan (PEP201752521)	3	23	GVSEWDPILEELQQM	1040.15	1002.33	37.83	994	936	58	95.6667	42.8889	0.448316
Wild Type Peptide GVSEWDPILEELQEM, Peptide Substitution Scan (PEP201752521)	19	23	GVSEWDPILEELQQM	1245.37	1197.25	48.12	1241	1081	160
Wild Type Peptide GVSEWDPILEELQEM, Peptide Substitution Scan (PEP201752521)	3	47	GVSEWDPILEELQQM	889.37	883.75	5.63	894	825	69
Wild Type Peptide GVSEWDPILEELQEM, Peptide Substitution Scan (PEP201752521)	3	24	GVSEWDPILEELQRM	915	1002.33	0	894	936	0	3.33333	4.44444	1.33333
Wild Type Peptide GVSEWDPILEELQEM, Peptide Substitution Scan (PEP201752521)	19	24	GVSEWDPILEELQRM	1129.91	1197.25	0	1091	1081	10
Wild Type Peptide GVSEWDPILEELQEM, Peptide Substitution Scan (PEP201752521)	3	48	GVSEWDPILEELQRM	783.56	883.75	0	785	825	0
Wild Type Peptide GVSEWDPILEELQEM, Peptide Substitution Scan (PEP201752521)	3	25	GVSEWDPILEELQSM	908.34	1002.33	0	846	936	0	129.5	86.3333	0.666667
Wild Type Peptide GVSEWDPILEELQEM, Peptide Substitution Scan (PEP201752521)	19	25	GVSEWDPILEELQSM	1369.94	1197.25	172.69	1274.5	1081	193.5
Wild Type Peptide GVSEWDPILEELQEM, Peptide Substitution Scan (PEP201752521)	3	49	GVSEWDPILEELQSM	1021.13	883.75	137.38	1020	825	195
Wild Type Peptide GVSEWDPILEELQEM, Peptide Substitution Scan (PEP201752521)	3	26	GVSEWDPILEELQTM	1358.57	1002.33	356.24	1301	936	365	291.667	73.1111	0.250667
Wild Type Peptide GVSEWDPILEELQEM, Peptide Substitution Scan (PEP201752521)	19	26	GVSEWDPILEELQTM	1450.53	1197.25	253.28	1409	1081	328
Wild Type Peptide GVSEWDPILEELQEM, Peptide Substitution Scan (PEP201752521)	3	50	GVSEWDPILEELQTM	987.07	883.75	103.32	1007	825	182
Wild Type Peptide GVSEWDPILEELQEM, Peptide Substitution Scan (PEP201752521)	3	32	GVSEWDPILEELQUM	894.88	1002.33	0	866	936	0	5	6.66667	1.33333
Wild Type Peptide GVSEWDPILEELQEM, Peptide Substitution Scan (PEP201752521)	19	32	GVSEWDPILEELQUM	1112.91	1197.25	0	1096	1081	15
Wild Type Peptide GVSEWDPILEELQEM, Peptide Substitution Scan (PEP201752521)	3	56	GVSEWDPILEELQUM	680.94	883.75	0	661	825	0
Wild Type Peptide GVSEWDPILEELQEM, Peptide Substitution Scan (PEP201752521)	3	27	GVSEWDPILEELQVM	1295.91	1002.33	293.58	1301.5	936	365.5	398.167	287.222	0.721362
Wild Type Peptide GVSEWDPILEELQEM, Peptide Substitution Scan (PEP201752521)	19	27	GVSEWDPILEELQVM	1949.45	1197.25	752.2	1910	1081	829
Wild Type Peptide GVSEWDPILEELQEM, Peptide Substitution Scan (PEP201752521)	3	51	GVSEWDPILEELQVM	876.78	883.75	0	734	825	0
Wild Type Peptide GVSEWDPILEELQEM, Peptide Substitution Scan (PEP201752521)	3	28	GVSEWDPILEELQWM	1305.35	1002.33	303.03	1309	936	373	410.5	90.3333	0.220057
Wild Type Peptide GVSEWDPILEELQEM, Peptide Substitution Scan (PEP201752521)	19	28	GVSEWDPILEELQWM	1677.07	1197.25	479.82	1627	1081	546
Wild Type Peptide GVSEWDPILEELQEM, Peptide Substitution Scan (PEP201752521)	3	52	GVSEWDPILEELQWM	1146.81	883.75	263.06	1137.5	825	312.5
Wild Type Peptide GVSEWDPILEELQEM, Peptide Substitution Scan (PEP201752521)	3	29	GVSEWDPILEELQYM	2083.12	1002.33	1080.79	2052	936	1116	1315.33	161.778	0.122994
Wild Type Peptide GVSEWDPILEELQEM, Peptide Substitution Scan (PEP201752521)	19	29	GVSEWDPILEELQYM	2737.27	1197.25	1540.02	2639	1081	1558
Wild Type Peptide GVSEWDPILEELQEM, Peptide Substitution Scan (PEP201752521)	3	53	GVSEWDPILEELQYM	2068.63	883.75	1184.88	2097	825	1272
Wild Type Peptide GVSEWDPILEELQEM, Peptide Substitution Scan (PEP201752521)	4	24	GVSEWDPILEELREM	2326.78	1002.33	1324.45	2313.5	936	1377.5	1027.83	529.889	0.51554
Wild Type Peptide GVSEWDPILEELQEM, Peptide Substitution Scan (PEP201752521)	20	24	GVSEWDPILEELREM	2608.26	1197.25	1411.01	2554	1081	1473
Wild Type Peptide GVSEWDPILEELQEM, Peptide Substitution Scan (PEP201752521)	4	48	GVSEWDPILEELREM	1219.69	883.75	335.94	1058	825	233
Wild Type Peptide GVSEWDPILEELQEM, Peptide Substitution Scan (PEP201752521)	4	25	GVSEWDPILEELSEM	2980.52	1002.33	1978.2	3086	936	2150	1516	770	0.507916
Wild Type Peptide GVSEWDPILEELQEM, Peptide Substitution Scan (PEP201752521)	20	25	GVSEWDPILEELSEM	3247.56	1197.25	2050.31	3118	1081	2037
Wild Type Peptide GVSEWDPILEELQEM, Peptide Substitution Scan (PEP201752521)	4	49	GVSEWDPILEELSEM	1363.18	883.75	479.44	1186	825	361
Wild Type Peptide GVSEWDPILEELQEM, Peptide Substitution Scan (PEP201752521)	4	26	GVSEWDPILEELTEM	3162.96	1002.33	2160.63	3091	936	2155	2147.5	543	0.252852
Wild Type Peptide GVSEWDPILEELQEM, Peptide Substitution Scan (PEP201752521)	20	26	GVSEWDPILEELTEM	3945.42	1197.25	2748.17	4035.5	1081	2954.5
Wild Type Peptide GVSEWDPILEELQEM, Peptide Substitution Scan (PEP201752521)	4	50	GVSEWDPILEELTEM	2371.31	883.75	1487.56	2158	825	1333
Wild Type Peptide GVSEWDPILEELQEM, Peptide Substitution Scan (PEP201752521)	4	32	GVSEWDPILEELUEM	2388.31	1002.33	1385.98	1831.5	936	895.5	972.833	51.5556	0.0529953
Wild Type Peptide GVSEWDPILEELQEM, Peptide Substitution Scan (PEP201752521)	20	32	GVSEWDPILEELUEM	2079.34	1197.25	882.09	2116	1081	1035
Wild Type Peptide GVSEWDPILEELQEM, Peptide Substitution Scan (PEP201752521)	4	56	GVSEWDPILEELUEM	1793.24	883.75	909.49	1813	825	988
Wild Type Peptide GVSEWDPILEELQEM, Peptide Substitution Scan (PEP201752521)	4	27	GVSEWDPILEELVEM	3791.58	1002.33	2789.26	3970	936	3034	2321	703.333	0.30303
Wild Type Peptide GVSEWDPILEELQEM, Peptide Substitution Scan (PEP201752521)	20	27	GVSEWDPILEELVEM	3638.47	1197.25	2441.22	3744	1081	2663
Wild Type Peptide GVSEWDPILEELQEM, Peptide Substitution Scan (PEP201752521)	4	51	GVSEWDPILEELVEM	2155.46	883.75	1271.71	2091	825	1266
Wild Type Peptide GVSEWDPILEELQEM, Peptide Substitution Scan (PEP201752521)	4	28	GVSEWDPILEELWEM	5099.68	1002.33	4097.35	5186	936	4250	3951.5	587.667	0.14872
Wild Type Peptide GVSEWDPILEELQEM, Peptide Substitution Scan (PEP201752521)	20	28	GVSEWDPILEELWEM	5390.08	1197.25	4192.84	5615.5	1081	4534.5
Wild Type Peptide GVSEWDPILEELQEM, Peptide Substitution Scan (PEP201752521)	4	52	GVSEWDPILEELWEM	4012.64	883.75	3128.89	3895	825	3070
Wild Type Peptide GVSEWDPILEELQEM, Peptide Substitution Scan (PEP201752521)	4	29	GVSEWDPILEELYEM	6840.85	1002.33	5838.52	6873.5	936	5937.5	6888.33	633.889	0.0920236
Wild Type Peptide GVSEWDPILEELQEM, Peptide Substitution Scan (PEP201752521)	20	29	GVSEWDPILEELYEM	8382.38	1197.25	7185.13	8473.5	1081	7392.5
Wild Type Peptide GVSEWDPILEELQEM, Peptide Substitution Scan (PEP201752521)	4	53	GVSEWDPILEELYEM	8306	883.75	7422.25	8160	825	7335
Wild Type Peptide GVSEWDPILEELQEM, Peptide Substitution Scan (PEP201752521)	5	20	GVSEWDPILEEMQEM	1716.24	1002.33	713.91	1732	936	796	779	84	0.107831
Wild Type Peptide GVSEWDPILEELQEM, Peptide Substitution Scan (PEP201752521)	21	20	GVSEWDPILEEMQEM	1788.39	1197.25	591.14	1734	1081	653
Wild Type Peptide GVSEWDPILEELQEM, Peptide Substitution Scan (PEP201752521)	5	44	GVSEWDPILEEMQEM	1693.7	883.75	809.95	1713	825	888
Wild Type Peptide GVSEWDPILEELQEM, Peptide Substitution Scan (PEP201752521)	5	21	GVSEWDPILEENQEM	2068.57	1002.33	1066.24	2100.5	936	1164.5	819.833	229.778	0.280274
Wild Type Peptide GVSEWDPILEELQEM, Peptide Substitution Scan (PEP201752521)	21	21	GVSEWDPILEENQEM	1699.76	1197.25	502.52	1715	1081	634
Wild Type Peptide GVSEWDPILEELQEM, Peptide Substitution Scan (PEP201752521)	5	45	GVSEWDPILEENQEM	1495.48	883.75	611.73	1486	825	661
Wild Type Peptide GVSEWDPILEELQEM, Peptide Substitution Scan (PEP201752521)	5	31	GVSEWDPILEEOQEM	1828.35	1002.33	826.02	1866	936	930	770.333	106.444	0.13818
Wild Type Peptide GVSEWDPILEELQEM, Peptide Substitution Scan (PEP201752521)	21	31	GVSEWDPILEEOQEM	1668.43	1197.25	471.18	1728	1081	647
Wild Type Peptide GVSEWDPILEELQEM, Peptide Substitution Scan (PEP201752521)	5	55	GVSEWDPILEEOQEM	1605.37	883.75	721.62	1559	825	734
Wild Type Peptide GVSEWDPILEELQEM, Peptide Substitution Scan (PEP201752521)	5	22	GVSEWDPILEEPQEM	2325.66	1002.33	1323.33	2225	936	1289	1212.17	51.2222	0.0422567
Wild Type Peptide GVSEWDPILEELQEM, Peptide Substitution Scan (PEP201752521)	21	22	GVSEWDPILEEPQEM	2372.64	1197.25	1175.39	2273.5	1081	1192.5
Wild Type Peptide GVSEWDPILEELQEM, Peptide Substitution Scan (PEP201752521)	5	46	GVSEWDPILEEPQEM	1980.52	883.75	1096.77	1980	825	1155
Wild Type Peptide GVSEWDPILEELQEM, Peptide Substitution Scan (PEP201752521)	5	23	GVSEWDPILEEQQEM	1791.63	1002.33	789.3	1599	936	663	649.333	14.2222	0.0219028
Wild Type Peptide GVSEWDPILEELQEM, Peptide Substitution Scan (PEP201752521)	21	23	GVSEWDPILEEQQEM	1703.28	1197.25	506.03	1709	1081	628
Wild Type Peptide GVSEWDPILEELQEM, Peptide Substitution Scan (PEP201752521)	5	47	GVSEWDPILEEQQEM	1520.74	883.75	636.99	1482	825	657
Wild Type Peptide GVSEWDPILEELQEM, Peptide Substitution Scan (PEP201752521)	5	24	GVSEWDPILEERQEM	1666.41	1002.33	664.08	1589	936	653	624.833	89.5556	0.143327
Wild Type Peptide GVSEWDPILEELQEM, Peptide Substitution Scan (PEP201752521)	21	24	GVSEWDPILEERQEM	1544.97	1197.25	347.72	1571.5	1081	490.5
Wild Type Peptide GVSEWDPILEELQEM, Peptide Substitution Scan (PEP201752521)	5	48	GVSEWDPILEERQEM	1550.46	883.75	666.71	1556	825	731
Wild Type Peptide GVSEWDPILEELQEM, Peptide Substitution Scan (PEP201752521)	5	25	GVSEWDPILEESQEM	2099.32	1002.33	1096.99	1981	936	1045	964.5	53.6667	0.055642
Wild Type Peptide GVSEWDPILEELQEM, Peptide Substitution Scan (PEP201752521)	21	25	GVSEWDPILEESQEM	2052.22	1197.25	854.97	2037.5	1081	956.5
Wild Type Peptide GVSEWDPILEELQEM, Peptide Substitution Scan (PEP201752521)	5	49	GVSEWDPILEESQEM	1842.93	883.75	959.19	1717	825	892
Wild Type Peptide GVSEWDPILEELQEM, Peptide Substitution Scan (PEP201752521)	5	26	GVSEWDPILEETQEM	2599.57	1002.33	1597.24	2187.5	936	1251.5	1056.5	155	0.146711
Wild Type Peptide GVSEWDPILEELQEM, Peptide Substitution Scan (PEP201752521)	21	26	GVSEWDPILEETQEM	2032.6	1197.25	835.35	1905	1081	824
Wild Type Peptide GVSEWDPILEELQEM, Peptide Substitution Scan (PEP201752521)	5	50	GVSEWDPILEETQEM	2273.5	883.75	1389.75	1919	825	1094
Wild Type Peptide GVSEWDPILEELQEM, Peptide Substitution Scan (PEP201752521)	5	32	GVSEWDPILEEUQEM	1396.33	1002.33	394	1343	936	407	152	170	1.11842
Wild Type Peptide GVSEWDPILEELQEM, Peptide Substitution Scan (PEP201752521)	21	32	GVSEWDPILEEUQEM	1053.83	1197.25	0	1099	1081	18
Wild Type Peptide GVSEWDPILEELQEM, Peptide Substitution Scan (PEP201752521)	5	56	GVSEWDPILEEUQEM	871.12	883.75	0	856	825	31
Wild Type Peptide GVSEWDPILEELQEM, Peptide Substitution Scan (PEP201752521)	5	27	GVSEWDPILEEVQEM	1882.12	1002.33	879.79	1899	936	963	899	42.6667	0.0474601
Wild Type Peptide GVSEWDPILEELQEM, Peptide Substitution Scan (PEP201752521)	21	27	GVSEWDPILEEVQEM	2007.99	1197.25	810.74	1965	1081	884
Wild Type Peptide GVSEWDPILEELQEM, Peptide Substitution Scan (PEP201752521)	5	51	GVSEWDPILEEVQEM	1673.68	883.75	789.93	1675	825	850
Wild Type Peptide GVSEWDPILEELQEM, Peptide Substitution Scan (PEP201752521)	5	28	GVSEWDPILEEWQEM	3044.49	1002.33	2042.16	2908	936	1972	2038.33	154.444	0.07577
Wild Type Peptide GVSEWDPILEELQEM, Peptide Substitution Scan (PEP201752521)	21	28	GVSEWDPILEEWQEM	3092.23	1197.25	1894.98	2954	1081	1873
Wild Type Peptide GVSEWDPILEELQEM, Peptide Substitution Scan (PEP201752521)	5	52	GVSEWDPILEEWQEM	3210.31	883.75	2326.57	3095	825	2270
Wild Type Peptide GVSEWDPILEELQEM, Peptide Substitution Scan (PEP201752521)	5	29	GVSEWDPILEEYQEM	4506.09	1002.33	3503.76	4500	936	3564	3670.17	524.889	0.143015
Wild Type Peptide GVSEWDPILEELQEM, Peptide Substitution Scan (PEP201752521)	21	29	GVSEWDPILEEYQEM	4354.5	1197.25	3157.25	4070	1081	2989
Wild Type Peptide GVSEWDPILEELQEM, Peptide Substitution Scan (PEP201752521)	5	53	GVSEWDPILEEYQEM	5264.39	883.75	4380.64	5282.5	825	4457.5
Wild Type Peptide GVSEWDPILEELQEM, Peptide Substitution Scan (PEP201752521)	6	14	GVSEWDPILEFLQEM	1859.58	1002.33	857.25	1869.5	936	933.5	1233	225	0.182482
Wild Type Peptide GVSEWDPILEELQEM, Peptide Substitution Scan (PEP201752521)	22	14	GVSEWDPILEFLQEM	2831.51	1197.25	1634.26	2651.5	1081	1570.5
Wild Type Peptide GVSEWDPILEELQEM, Peptide Substitution Scan (PEP201752521)	6	38	GVSEWDPILEFLQEM	1998	883.75	1114.25	2020	825	1195
Wild Type Peptide GVSEWDPILEELQEM, Peptide Substitution Scan (PEP201752521)	6	15	GVSEWDPILEGLQEM	1041.35	1002.33	39.02	1058	936	122	185	91.3333	0.493694
Wild Type Peptide GVSEWDPILEELQEM, Peptide Substitution Scan (PEP201752521)	22	15	GVSEWDPILEGLQEM	1188.55	1197.25	0	1192	1081	111
Wild Type Peptide GVSEWDPILEELQEM, Peptide Substitution Scan (PEP201752521)	6	39	GVSEWDPILEGLQEM	1137.91	883.75	254.16	1147	825	322
Wild Type Peptide GVSEWDPILEELQEM, Peptide Substitution Scan (PEP201752521)	6	16	GVSEWDPILEHLQEM	932.52	1002.33	0	932	936	0	144	115.333	0.800926
Wild Type Peptide GVSEWDPILEELQEM, Peptide Substitution Scan (PEP201752521)	22	16	GVSEWDPILEHLQEM	1221.34	1197.25	24.09	1196	1081	115
Wild Type Peptide GVSEWDPILEELQEM, Peptide Substitution Scan (PEP201752521)	6	40	GVSEWDPILEHLQEM	1137.29	883.75	253.54	1142	825	317
Wild Type Peptide GVSEWDPILEELQEM, Peptide Substitution Scan (PEP201752521)	6	17	GVSEWDPILEILQEM	1541.03	1002.33	538.7	1457	936	521	640	79.3333	0.123958
Wild Type Peptide GVSEWDPILEELQEM, Peptide Substitution Scan (PEP201752521)	22	17	GVSEWDPILEILQEM	1811.16	1197.25	613.91	1812	1081	731
Wild Type Peptide GVSEWDPILEELQEM, Peptide Substitution Scan (PEP201752521)	6	41	GVSEWDPILEILQEM	1487.39	883.75	603.64	1493	825	668
Wild Type Peptide GVSEWDPILEELQEM, Peptide Substitution Scan (PEP201752521)	6	30	GVSEWDPILEZLQEM	1354.6	1002.33	352.27	1291	936	355	193.833	129.222	0.666667
Wild Type Peptide GVSEWDPILEELQEM, Peptide Substitution Scan (PEP201752521)	22	30	GVSEWDPILEZLQEM	1016.76	1197.25	0	1011	1081	0
Wild Type Peptide GVSEWDPILEELQEM, Peptide Substitution Scan (PEP201752521)	6	54	GVSEWDPILEZLQEM	1042.18	883.75	158.43	1051.5	825	226.5
Wild Type Peptide GVSEWDPILEELQEM, Peptide Substitution Scan (PEP201752521)	6	18	GVSEWDPILEKLQEM	1089.02	1002.33	86.7	1066	936	130	74	49.3333	0.666667
Wild Type Peptide GVSEWDPILEELQEM, Peptide Substitution Scan (PEP201752521)	22	18	GVSEWDPILEKLQEM	1022.17	1197.25	0	1002	1081	0
Wild Type Peptide GVSEWDPILEELQEM, Peptide Substitution Scan (PEP201752521)	6	42	GVSEWDPILEKLQEM	962.18	883.75	78.43	917	825	92
Wild Type Peptide GVSEWDPILEELQEM, Peptide Substitution Scan (PEP201752521)	6	19	GVSEWDPILELLQEM	1405.42	1002.33	403.09	1348	936	412	459.667	74.8889	0.16292
Wild Type Peptide GVSEWDPILEELQEM, Peptide Substitution Scan (PEP201752521)	22	19	GVSEWDPILELLQEM	1507.32	1197.25	310.07	1476	1081	395
Wild Type Peptide GVSEWDPILEELQEM, Peptide Substitution Scan (PEP201752521)	6	43	GVSEWDPILELLQEM	1403.89	883.75	520.14	1397	825	572
Wild Type Peptide GVSEWDPILEELQEM, Peptide Substitution Scan (PEP201752521)	6	20	GVSEWDPILEMLQEM	1092.34	1002.33	90.02	1106	936	170	181	38.6667	0.213628
Wild Type Peptide GVSEWDPILEELQEM, Peptide Substitution Scan (PEP201752521)	22	20	GVSEWDPILEMLQEM	1219.76	1197.25	22.51	1215	1081	134
Wild Type Peptide GVSEWDPILEELQEM, Peptide Substitution Scan (PEP201752521)	6	44	GVSEWDPILEMLQEM	1078.4	883.75	194.65	1064	825	239
Wild Type Peptide GVSEWDPILEELQEM, Peptide Substitution Scan (PEP201752521)	6	21	GVSEWDPILENLQEM	1170.09	1002.33	167.76	1143	936	207	189	88.6667	0.469136
Wild Type Peptide GVSEWDPILEELQEM, Peptide Substitution Scan (PEP201752521)	22	21	GVSEWDPILENLQEM	1125.4	1197.25	0	1137	1081	56
Wild Type Peptide GVSEWDPILEELQEM, Peptide Substitution Scan (PEP201752521)	6	45	GVSEWDPILENLQEM	1129.88	883.75	246.13	1129	825	304
Wild Type Peptide GVSEWDPILEELQEM, Peptide Substitution Scan (PEP201752521)	6	31	GVSEWDPILEOLQEM	1571.59	1002.33	569.27	1498	936	562	372	200.667	0.539427
Wild Type Peptide GVSEWDPILEELQEM, Peptide Substitution Scan (PEP201752521)	22	31	GVSEWDPILEOLQEM	1201.28	1197.25	4.03	1152	1081	71
Wild Type Peptide GVSEWDPILEELQEM, Peptide Substitution Scan (PEP201752521)	6	55	GVSEWDPILEOLQEM	1334.18	883.75	450.43	1308	825	483
Wild Type Peptide GVSEWDPILEELQEM, Peptide Substitution Scan (PEP201752521)	6	22	GVSEWDPILEPLQEM	1374.38	1002.33	372.05	1360	936	424	375.333	101.556	0.270574
Wild Type Peptide GVSEWDPILEELQEM, Peptide Substitution Scan (PEP201752521)	22	22	GVSEWDPILEPLQEM	1341.86	1197.25	144.62	1304	1081	223
Wild Type Peptide GVSEWDPILEELQEM, Peptide Substitution Scan (PEP201752521)	6	46	GVSEWDPILEPLQEM	1303.05	883.75	419.3	1304	825	479
Wild Type Peptide GVSEWDPILEELQEM, Peptide Substitution Scan (PEP201752521)	6	23	GVSEWDPILEQLQEM	1147.1	1002.33	144.78	1110	936	174	156.667	104.444	0.666667
Wild Type Peptide GVSEWDPILEELQEM, Peptide Substitution Scan (PEP201752521)	22	23	GVSEWDPILEQLQEM	1045.95	1197.25	0	1033	1081	0
Wild Type Peptide GVSEWDPILEELQEM, Peptide Substitution Scan (PEP201752521)	6	47	GVSEWDPILEQLQEM	1125.18	883.75	241.43	1121	825	296
Wild Type Peptide GVSEWDPILEELQEM, Peptide Substitution Scan (PEP201752521)	6	24	GVSEWDPILERLQEM	1329.99	1002.33	327.67	1181	936	245	132	88	0.666667
Wild Type Peptide GVSEWDPILEELQEM, Peptide Substitution Scan (PEP201752521)	22	24	GVSEWDPILERLQEM	1053.44	1197.25	0	1047	1081	0
Wild Type Peptide GVSEWDPILEELQEM, Peptide Substitution Scan (PEP201752521)	6	48	GVSEWDPILERLQEM	1016.63	883.75	132.88	976	825	151
Wild Type Peptide GVSEWDPILEELQEM, Peptide Substitution Scan (PEP201752521)	6	25	GVSEWDPILESLQEM	1398.53	1002.33	396.21	1291	936	355	318.667	118.444	0.371688
Wild Type Peptide GVSEWDPILEELQEM, Peptide Substitution Scan (PEP201752521)	22	25	GVSEWDPILESLQEM	1203.28	1197.25	6.03	1222	1081	141
Wild Type Peptide GVSEWDPILEELQEM, Peptide Substitution Scan (PEP201752521)	6	49	GVSEWDPILESLQEM	1274.09	883.75	390.34	1285	825	460
Wild Type Peptide GVSEWDPILEELQEM, Peptide Substitution Scan (PEP201752521)	6	26	GVSEWDPILETLQEM	1526.86	1002.33	524.54	1457	936	521	276.5	184.333	0.666667
Wild Type Peptide GVSEWDPILEELQEM, Peptide Substitution Scan (PEP201752521)	22	26	GVSEWDPILETLQEM	1059.28	1197.25	0	1046	1081	0
Wild Type Peptide GVSEWDPILEELQEM, Peptide Substitution Scan (PEP201752521)	6	50	GVSEWDPILETLQEM	1131.48	883.75	247.73	1133.5	825	308.5
Wild Type Peptide GVSEWDPILEELQEM, Peptide Substitution Scan (PEP201752521)	6	32	GVSEWDPILEULQEM	1942.74	1002.33	940.41	1688	936	752	262.667	326.222	1.24196
Wild Type Peptide GVSEWDPILEELQEM, Peptide Substitution Scan (PEP201752521)	22	32	GVSEWDPILEULQEM	1085.32	1197.25	0	1117	1081	36
Wild Type Peptide GVSEWDPILEELQEM, Peptide Substitution Scan (PEP201752521)	6	56	GVSEWDPILEULQEM	808.02	883.75	0	757.5	825	0
Wild Type Peptide GVSEWDPILEELQEM, Peptide Substitution Scan (PEP201752521)	6	27	GVSEWDPILEVLQEM	1256.95	1002.33	254.62	1254	936	318	337.167	75.8889	0.225078
Wild Type Peptide GVSEWDPILEELQEM, Peptide Substitution Scan (PEP201752521)	22	27	GVSEWDPILEVLQEM	1370.59	1197.25	173.34	1323.5	1081	242.5
Wild Type Peptide GVSEWDPILEELQEM, Peptide Substitution Scan (PEP201752521)	6	51	GVSEWDPILEVLQEM	1265.18	883.75	381.43	1276	825	451
Wild Type Peptide GVSEWDPILEELQEM, Peptide Substitution Scan (PEP201752521)	6	28	GVSEWDPILEWLQEM	1598.67	1002.33	596.34	1560	936	624	498.667	155.778	0.312389
Wild Type Peptide GVSEWDPILEELQEM, Peptide Substitution Scan (PEP201752521)	22	28	GVSEWDPILEWLQEM	1439.52	1197.25	242.27	1346	1081	265
Wild Type Peptide GVSEWDPILEELQEM, Peptide Substitution Scan (PEP201752521)	6	52	GVSEWDPILEWLQEM	1494.65	883.75	610.9	1432	825	607
Wild Type Peptide GVSEWDPILEELQEM, Peptide Substitution Scan (PEP201752521)	6	29	GVSEWDPILEYLQEM	2089.13	1002.33	1086.8	2085	936	1149	1189.33	112.111	0.0942638
Wild Type Peptide GVSEWDPILEELQEM, Peptide Substitution Scan (PEP201752521)	22	29	GVSEWDPILEYLQEM	2199.89	1197.25	1002.64	2142.5	1081	1061.5
Wild Type Peptide GVSEWDPILEELQEM, Peptide Substitution Scan (PEP201752521)	6	53	GVSEWDPILEYLQEM	2230.87	883.75	1347.12	2182.5	825	1357.5
Wild Type Peptide GVSEWDPILEELQEM, Peptide Substitution Scan (PEP201752521)	7	14	GVSEWDPILFELQEM	2552.36	1002.33	1550.04	2551	936	1615	1788.33	460.444	0.257471
Wild Type Peptide GVSEWDPILEELQEM, Peptide Substitution Scan (PEP201752521)	23	14	GVSEWDPILFELQEM	3578.32	1197.25	2381.08	3560	1081	2479
Wild Type Peptide GVSEWDPILEELQEM, Peptide Substitution Scan (PEP201752521)	7	38	GVSEWDPILFELQEM	1964.69	883.75	1080.94	2096	825	1271
Wild Type Peptide GVSEWDPILEELQEM, Peptide Substitution Scan (PEP201752521)	7	15	GVSEWDPILGELQEM	892.77	1002.33	0	873	936	0	183	214.667	1.17304
Wild Type Peptide GVSEWDPILEELQEM, Peptide Substitution Scan (PEP201752521)	23	15	GVSEWDPILGELQEM	1132.88	1197.25	0	1125	1081	44
Wild Type Peptide GVSEWDPILEELQEM, Peptide Substitution Scan (PEP201752521)	7	39	GVSEWDPILGELQEM	1338.51	883.75	454.76	1330	825	505
Wild Type Peptide GVSEWDPILEELQEM, Peptide Substitution Scan (PEP201752521)	7	16	GVSEWDPILHELQEM	1036.47	1002.33	34.14	1012	936	76	294.5	223.333	0.758347
Wild Type Peptide GVSEWDPILEELQEM, Peptide Substitution Scan (PEP201752521)	23	16	GVSEWDPILHELQEM	1344.18	1197.25	146.94	1259	1081	178
Wild Type Peptide GVSEWDPILEELQEM, Peptide Substitution Scan (PEP201752521)	7	40	GVSEWDPILHELQEM	1525.43	883.75	641.68	1454.5	825	629.5
Wild Type Peptide GVSEWDPILEELQEM, Peptide Substitution Scan (PEP201752521)	7	17	GVSEWDPILIELQEM	3922.01	1002.33	2919.68	3960	936	3024	3480.83	1149.78	0.330317
Wild Type Peptide GVSEWDPILEELQEM, Peptide Substitution Scan (PEP201752521)	23	17	GVSEWDPILIELQEM	5980.24	1197.25	4782.99	6286.5	1081	5205.5
Wild Type Peptide GVSEWDPILEELQEM, Peptide Substitution Scan (PEP201752521)	7	41	GVSEWDPILIELQEM	3365.13	883.75	2481.39	3038	825	2213
Wild Type Peptide GVSEWDPILEELQEM, Peptide Substitution Scan (PEP201752521)	7	30	GVSEWDPILZELQEM	1150.64	1002.33	148.32	1123	936	187	153.333	102.222	0.666667
Wild Type Peptide GVSEWDPILEELQEM, Peptide Substitution Scan (PEP201752521)	23	30	GVSEWDPILZELQEM	1000.28	1197.25	0	976	1081	0
Wild Type Peptide GVSEWDPILEELQEM, Peptide Substitution Scan (PEP201752521)	7	54	GVSEWDPILZELQEM	1097.31	883.75	213.56	1098	825	273
Wild Type Peptide GVSEWDPILEELQEM, Peptide Substitution Scan (PEP201752521)	7	18	GVSEWDPILKELQEM	918.61	1002.33	0	907	936	0	71	63.3333	0.892019
Wild Type Peptide GVSEWDPILEELQEM, Peptide Substitution Scan (PEP201752521)	23	18	GVSEWDPILKELQEM	1201.39	1197.25	4.14	1128	1081	47
Wild Type Peptide GVSEWDPILEELQEM, Peptide Substitution Scan (PEP201752521)	7	42	GVSEWDPILKELQEM	1076.45	883.75	192.7	991	825	166
Wild Type Peptide GVSEWDPILEELQEM, Peptide Substitution Scan (PEP201752521)	7	19	GVSEWDPILLELQEM	1972.39	1002.33	970.06	1986	936	1050	1135.33	230.111	0.202682
Wild Type Peptide GVSEWDPILEELQEM, Peptide Substitution Scan (PEP201752521)	23	19	GVSEWDPILLELQEM	2474.97	1197.25	1277.72	2561.5	1081	1480.5
Wild Type Peptide GVSEWDPILEELQEM, Peptide Substitution Scan (PEP201752521)	7	43	GVSEWDPILLELQEM	1871.24	883.75	987.49	1700.5	825	875.5
Wild Type Peptide GVSEWDPILEELQEM, Peptide Substitution Scan (PEP201752521)	7	20	GVSEWDPILMELQEM	1130.7	1002.33	128.37	1131	936	195	171.333	15.7778	0.0920882
Wild Type Peptide GVSEWDPILEELQEM, Peptide Substitution Scan (PEP201752521)	23	20	GVSEWDPILMELQEM	1241.56	1197.25	44.31	1232	1081	151
Wild Type Peptide GVSEWDPILEELQEM, Peptide Substitution Scan (PEP201752521)	7	44	GVSEWDPILMELQEM	975.54	883.75	91.79	993	825	168
Wild Type Peptide GVSEWDPILEELQEM, Peptide Substitution Scan (PEP201752521)	7	21	GVSEWDPILNELQEM	1274.12	1002.33	271.79	1253	936	317	251.5	90	0.357853
Wild Type Peptide GVSEWDPILEELQEM, Peptide Substitution Scan (PEP201752521)	23	21	GVSEWDPILNELQEM	1180.42	1197.25	0	1197.5	1081	116.5
Wild Type Peptide GVSEWDPILEELQEM, Peptide Substitution Scan (PEP201752521)	7	45	GVSEWDPILNELQEM	1158.84	883.75	275.09	1146	825	321
Wild Type Peptide GVSEWDPILEELQEM, Peptide Substitution Scan (PEP201752521)	7	31	GVSEWDPILOELQEM	1432.46	1002.33	430.13	1352	936	416	386.167	253.444	0.656308
Wild Type Peptide GVSEWDPILEELQEM, Peptide Substitution Scan (PEP201752521)	23	31	GVSEWDPILOELQEM	1064.35	1197.25	0	1087	1081	6
Wild Type Peptide GVSEWDPILEELQEM, Peptide Substitution Scan (PEP201752521)	7	55	GVSEWDPILOELQEM	1570.31	883.75	686.57	1561.5	825	736.5
Wild Type Peptide GVSEWDPILEELQEM, Peptide Substitution Scan (PEP201752521)	7	22	GVSEWDPILPELQEM	1277.61	1002.33	275.28	1265.5	936	329.5	401.833	139.444	0.347021
Wild Type Peptide GVSEWDPILEELQEM, Peptide Substitution Scan (PEP201752521)	23	22	GVSEWDPILPELQEM	1454.63	1197.25	257.38	1346	1081	265
Wild Type Peptide GVSEWDPILEELQEM, Peptide Substitution Scan (PEP201752521)	7	46	GVSEWDPILPELQEM	1418.73	883.75	534.98	1436	825	611
Wild Type Peptide GVSEWDPILEELQEM, Peptide Substitution Scan (PEP201752521)	7	23	GVSEWDPILQELQEM	1135.89	1002.33	133.57	1131	936	195	127.667	85.1111	0.666667
Wild Type Peptide GVSEWDPILEELQEM, Peptide Substitution Scan (PEP201752521)	23	23	GVSEWDPILQELQEM	1082.4	1197.25	0	1054	1081	0
Wild Type Peptide GVSEWDPILEELQEM, Peptide Substitution Scan (PEP201752521)	7	47	GVSEWDPILQELQEM	1031.94	883.75	148.19	1013	825	188
Wild Type Peptide GVSEWDPILEELQEM, Peptide Substitution Scan (PEP201752521)	7	24	GVSEWDPILRELQEM	1024.98	1002.33	22.65	1033	936	97	75.6667	50.4444	0.666667
Wild Type Peptide GVSEWDPILEELQEM, Peptide Substitution Scan (PEP201752521)	23	24	GVSEWDPILRELQEM	977.88	1197.25	0	984	1081	0
Wild Type Peptide GVSEWDPILEELQEM, Peptide Substitution Scan (PEP201752521)	7	48	GVSEWDPILRELQEM	954.51	883.75	70.76	955	825	130
Wild Type Peptide GVSEWDPILEELQEM, Peptide Substitution Scan (PEP201752521)	7	25	GVSEWDPILSELQEM	1229.85	1002.33	227.52	1225	936	289	208	54	0.259615
Wild Type Peptide GVSEWDPILEELQEM, Peptide Substitution Scan (PEP201752521)	23	25	GVSEWDPILSELQEM	1265.13	1197.25	67.88	1234	1081	153
Wild Type Peptide GVSEWDPILEELQEM, Peptide Substitution Scan (PEP201752521)	7	49	GVSEWDPILSELQEM	1055.19	883.75	171.44	1007	825	182
Wild Type Peptide GVSEWDPILEELQEM, Peptide Substitution Scan (PEP201752521)	7	26	GVSEWDPILTELQEM	1302.09	1002.33	299.76	1281.5	936	345.5	350.5	99.6667	0.284356
Wild Type Peptide GVSEWDPILEELQEM, Peptide Substitution Scan (PEP201752521)	23	26	GVSEWDPILTELQEM	1307.85	1197.25	110.61	1287	1081	206
Wild Type Peptide GVSEWDPILEELQEM, Peptide Substitution Scan (PEP201752521)	7	50	GVSEWDPILTELQEM	1405.91	883.75	522.16	1325	825	500
Wild Type Peptide GVSEWDPILEELQEM, Peptide Substitution Scan (PEP201752521)	7	32	GVSEWDPILUELQEM	1060.8	1002.33	58.48	1054	936	118	91.6667	61.1111	0.666667
Wild Type Peptide GVSEWDPILEELQEM, Peptide Substitution Scan (PEP201752521)	23	32	GVSEWDPILUELQEM	969.58	1197.25	0	942	1081	0
Wild Type Peptide GVSEWDPILEELQEM, Peptide Substitution Scan (PEP201752521)	7	56	GVSEWDPILUELQEM	962.68	883.75	78.93	982	825	157
Wild Type Peptide GVSEWDPILEELQEM, Peptide Substitution Scan (PEP201752521)	7	27	GVSEWDPILVELQEM	4765.02	1002.33	3762.69	4712.5	936	3776.5	3509.17	379.444	0.10813
Wild Type Peptide GVSEWDPILEELQEM, Peptide Substitution Scan (PEP201752521)	23	27	GVSEWDPILVELQEM	4841.7	1197.25	3644.46	4892	1081	3811
Wild Type Peptide GVSEWDPILEELQEM, Peptide Substitution Scan (PEP201752521)	7	51	GVSEWDPILVELQEM	3878.37	883.75	2994.62	3765	825	2940
Wild Type Peptide GVSEWDPILEELQEM, Peptide Substitution Scan (PEP201752521)	7	28	GVSEWDPILWELQEM	1881.18	1002.33	878.85	1860	936	924	827.833	81.8889	0.0989195
Wild Type Peptide GVSEWDPILEELQEM, Peptide Substitution Scan (PEP201752521)	23	28	GVSEWDPILWELQEM	1915.55	1197.25	718.3	1935.5	1081	854.5
Wild Type Peptide GVSEWDPILEELQEM, Peptide Substitution Scan (PEP201752521)	7	52	GVSEWDPILWELQEM	1554.8	883.75	671.05	1530	825	705
Wild Type Peptide GVSEWDPILEELQEM, Peptide Substitution Scan (PEP201752521)	7	29	GVSEWDPILYELQEM	2898.41	1002.33	1896.08	2654	936	1718	1167.17	367.222	0.314627
Wild Type Peptide GVSEWDPILEELQEM, Peptide Substitution Scan (PEP201752521)	23	29	GVSEWDPILYELQEM	1741.61	1197.25	544.36	1716.5	1081	635.5
Wild Type Peptide GVSEWDPILEELQEM, Peptide Substitution Scan (PEP201752521)	7	53	GVSEWDPILYELQEM	2744.4	883.75	1860.65	1973	825	1148
Wild Type Peptide GVSEWDPILEELQEM, Peptide Substitution Scan (PEP201752521)	8	20	GVSEWDPIMEELQEM	1306.45	1002.33	304.13	1314	936	378	406	54	0.133005
Wild Type Peptide GVSEWDPILEELQEM, Peptide Substitution Scan (PEP201752521)	24	20	GVSEWDPIMEELQEM	1388.13	1197.25	190.88	1434	1081	353
Wild Type Peptide GVSEWDPILEELQEM, Peptide Substitution Scan (PEP201752521)	8	44	GVSEWDPIMEELQEM	1293.04	883.75	409.29	1312	825	487
Wild Type Peptide GVSEWDPILEELQEM, Peptide Substitution Scan (PEP201752521)	8	21	GVSEWDPINEELQEM	1499.01	1002.33	496.68	1483	936	547	685	137.333	0.200487
Wild Type Peptide GVSEWDPILEELQEM, Peptide Substitution Scan (PEP201752521)	24	21	GVSEWDPINEELQEM	1752.49	1197.25	555.24	1698	1081	617
Wild Type Peptide GVSEWDPILEELQEM, Peptide Substitution Scan (PEP201752521)	8	45	GVSEWDPINEELQEM	1818.09	883.75	934.35	1716	825	891
Wild Type Peptide GVSEWDPILEELQEM, Peptide Substitution Scan (PEP201752521)	8	31	GVSEWDPIOEELQEM	1353.49	1002.33	351.17	1190	936	254	134.333	89.5556	0.666667
Wild Type Peptide GVSEWDPILEELQEM, Peptide Substitution Scan (PEP201752521)	24	31	GVSEWDPIOEELQEM	1003.32	1197.25	0	955	1081	0
Wild Type Peptide GVSEWDPILEELQEM, Peptide Substitution Scan (PEP201752521)	8	55	GVSEWDPIOEELQEM	968.63	883.75	84.88	974	825	149
Wild Type Peptide GVSEWDPILEELQEM, Peptide Substitution Scan (PEP201752521)	8	22	GVSEWDPIPEELQEM	1380.27	1002.33	377.95	1400	936	464	473.667	111.556	0.235515
Wild Type Peptide GVSEWDPILEELQEM, Peptide Substitution Scan (PEP201752521)	24	22	GVSEWDPIPEELQEM	1414.11	1197.25	216.87	1397	1081	316
Wild Type Peptide GVSEWDPILEELQEM, Peptide Substitution Scan (PEP201752521)	8	46	GVSEWDPIPEELQEM	1486.57	883.75	602.82	1466	825	641
Wild Type Peptide GVSEWDPILEELQEM, Peptide Substitution Scan (PEP201752521)	8	23	GVSEWDPIQEELQEM	1373.53	1002.33	371.2	1383	936	447	539	174	0.32282
Wild Type Peptide GVSEWDPILEELQEM, Peptide Substitution Scan (PEP201752521)	24	23	GVSEWDPIQEELQEM	1467.59	1197.25	270.35	1451	1081	370
Wild Type Peptide GVSEWDPILEELQEM, Peptide Substitution Scan (PEP201752521)	8	47	GVSEWDPIQEELQEM	1649.63	883.75	765.88	1625	825	800
Wild Type Peptide GVSEWDPILEELQEM, Peptide Substitution Scan (PEP201752521)	8	24	GVSEWDPIREELQEM	1384.64	1002.33	382.31	1377	936	441	366.333	113.556	0.309979
Wild Type Peptide GVSEWDPILEELQEM, Peptide Substitution Scan (PEP201752521)	24	24	GVSEWDPIREELQEM	1262.17	1197.25	64.92	1277	1081	196
Wild Type Peptide GVSEWDPILEELQEM, Peptide Substitution Scan (PEP201752521)	8	48	GVSEWDPIREELQEM	1280.91	883.75	397.16	1287	825	462
Wild Type Peptide GVSEWDPILEELQEM, Peptide Substitution Scan (PEP201752521)	8	25	GVSEWDPISEELQEM	1610.6	1002.33	608.28	1589	936	653	588.333	57.5556	0.0978281
Wild Type Peptide GVSEWDPILEELQEM, Peptide Substitution Scan (PEP201752521)	24	25	GVSEWDPISEELQEM	1639.24	1197.25	441.99	1583	1081	502
Wild Type Peptide GVSEWDPILEELQEM, Peptide Substitution Scan (PEP201752521)	8	49	GVSEWDPISEELQEM	1427.47	883.75	543.73	1435	825	610
Wild Type Peptide GVSEWDPILEELQEM, Peptide Substitution Scan (PEP201752521)	8	26	GVSEWDPITEELQEM	1592.23	1002.33	589.9	1615	936	679	595.667	143.778	0.241373
Wild Type Peptide GVSEWDPILEELQEM, Peptide Substitution Scan (PEP201752521)	24	26	GVSEWDPITEELQEM	1470.04	1197.25	272.79	1461	1081	380
Wild Type Peptide GVSEWDPILEELQEM, Peptide Substitution Scan (PEP201752521)	8	50	GVSEWDPITEELQEM	1635.82	883.75	752.07	1553	825	728
Wild Type Peptide GVSEWDPILEELQEM, Peptide Substitution Scan (PEP201752521)	8	32	GVSEWDPIUEELQEM	1929.8	1002.33	927.47	1820.5	936	884.5	637.833	164.444	0.257817
Wild Type Peptide GVSEWDPILEELQEM, Peptide Substitution Scan (PEP201752521)	24	32	GVSEWDPIUEELQEM	1820.37	1197.25	623.13	1481	1081	400
Wild Type Peptide GVSEWDPILEELQEM, Peptide Substitution Scan (PEP201752521)	8	56	GVSEWDPIUEELQEM	1456.37	883.75	572.63	1454	825	629
Wild Type Peptide GVSEWDPILEELQEM, Peptide Substitution Scan (PEP201752521)	8	27	GVSEWDPIVEELQEM	1743.69	1002.33	741.36	1784	936	848	1051	202	0.192198
Wild Type Peptide GVSEWDPILEELQEM, Peptide Substitution Scan (PEP201752521)	24	27	GVSEWDPIVEELQEM	2023.62	1197.25	826.37	2032	1081	951
Wild Type Peptide GVSEWDPILEELQEM, Peptide Substitution Scan (PEP201752521)	8	51	GVSEWDPIVEELQEM	2070.43	883.75	1186.68	2179	825	1354
Wild Type Peptide GVSEWDPILEELQEM, Peptide Substitution Scan (PEP201752521)	8	28	GVSEWDPIWEELQEM	4998.39	1002.33	3996.06	4831	936	3895	4002.5	125.667	0.031397
Wild Type Peptide GVSEWDPILEELQEM, Peptide Substitution Scan (PEP201752521)	24	28	GVSEWDPIWEELQEM	4999.25	1197.25	3802	5002.5	1081	3921.5
Wild Type Peptide GVSEWDPILEELQEM, Peptide Substitution Scan (PEP201752521)	8	52	GVSEWDPIWEELQEM	5158.22	883.75	4274.47	5016	825	4191
Wild Type Peptide GVSEWDPILEELQEM, Peptide Substitution Scan (PEP201752521)	8	29	GVSEWDPIYEELQEM	2854.77	1002.33	1852.44	2687	936	1751	2421.5	791.333	0.326795
Wild Type Peptide GVSEWDPILEELQEM, Peptide Substitution Scan (PEP201752521)	24	29	GVSEWDPIYEELQEM	3021.06	1197.25	1823.82	2986	1081	1905
Wild Type Peptide GVSEWDPILEELQEM, Peptide Substitution Scan (PEP201752521)	8	53	GVSEWDPIYEELQEM	4733.7	883.75	3849.95	4433.5	825	3608.5
Wild Type Peptide GVSEWDPILEELQEM, Peptide Substitution Scan (PEP201752521)	9	30	GVSEWDPZLEELQEM	1160.06	1002.33	157.74	1184	936	248	182	121.333	0.666667
Wild Type Peptide GVSEWDPILEELQEM, Peptide Substitution Scan (PEP201752521)	25	30	GVSEWDPZLEELQEM	1085.08	1197.25	0	1049	1081	0
Wild Type Peptide GVSEWDPILEELQEM, Peptide Substitution Scan (PEP201752521)	9	54	GVSEWDPZLEELQEM	1160.57	883.75	276.82	1123	825	298
Wild Type Peptide GVSEWDPILEELQEM, Peptide Substitution Scan (PEP201752521)	9	18	GVSEWDPKLEELQEM	1228.01	1002.33	225.68	1187	936	251	262	80	0.305344
Wild Type Peptide GVSEWDPILEELQEM, Peptide Substitution Scan (PEP201752521)	25	18	GVSEWDPKLEELQEM	1273.9	1197.25	76.66	1234	1081	153
Wild Type Peptide GVSEWDPILEELQEM, Peptide Substitution Scan (PEP201752521)	9	42	GVSEWDPKLEELQEM	1303.02	883.75	419.28	1207	825	382
Wild Type Peptide GVSEWDPILEELQEM, Peptide Substitution Scan (PEP201752521)	9	19	GVSEWDPLLEELQEM	2236.15	1002.33	1233.82	2240	936	1304	1604.33	200.222	0.124801
Wild Type Peptide GVSEWDPILEELQEM, Peptide Substitution Scan (PEP201752521)	25	19	GVSEWDPLLEELQEM	2711.02	1197.25	1513.78	2776	1081	1695
Wild Type Peptide GVSEWDPILEELQEM, Peptide Substitution Scan (PEP201752521)	9	43	GVSEWDPLLEELQEM	2741.24	883.75	1857.5	2639	825	1814
Wild Type Peptide GVSEWDPILEELQEM, Peptide Substitution Scan (PEP201752521)	9	20	GVSEWDPMLEELQEM	1266.27	1002.33	263.94	1272	936	336	378	96.6667	0.255732
Wild Type Peptide GVSEWDPILEELQEM, Peptide Substitution Scan (PEP201752521)	25	20	GVSEWDPMLEELQEM	1379.29	1197.25	182.04	1356	1081	275
Wild Type Peptide GVSEWDPILEELQEM, Peptide Substitution Scan (PEP201752521)	9	44	GVSEWDPMLEELQEM	1338.88	883.75	455.13	1348	825	523
Wild Type Peptide GVSEWDPILEELQEM, Peptide Substitution Scan (PEP201752521)	9	21	GVSEWDPNLEELQEM	1440.87	1002.33	438.54	1432	936	496	469	30	0.0639659
Wild Type Peptide GVSEWDPILEELQEM, Peptide Substitution Scan (PEP201752521)	25	21	GVSEWDPNLEELQEM	1510.53	1197.25	313.29	1505	1081	424
Wild Type Peptide GVSEWDPILEELQEM, Peptide Substitution Scan (PEP201752521)	9	45	GVSEWDPNLEELQEM	1330.34	883.75	446.59	1312	825	487
Wild Type Peptide GVSEWDPILEELQEM, Peptide Substitution Scan (PEP201752521)	9	31	GVSEWDPOLEELQEM	1005.65	1002.33	3.32	972	936	36	47.6667	39.5556	0.829837
Wild Type Peptide GVSEWDPILEELQEM, Peptide Substitution Scan (PEP201752521)	25	31	GVSEWDPOLEELQEM	854.87	1197.25	0	846	1081	0
Wild Type Peptide GVSEWDPILEELQEM, Peptide Substitution Scan (PEP201752521)	9	55	GVSEWDPOLEELQEM	976.42	883.75	92.67	932	825	107
Wild Type Peptide GVSEWDPILEELQEM, Peptide Substitution Scan (PEP201752521)	9	22	GVSEWDPPLEELQEM	1181.06	1002.33	178.73	1175.5	936	239.5	272.833	104.778	0.384036
Wild Type Peptide GVSEWDPILEELQEM, Peptide Substitution Scan (PEP201752521)	25	22	GVSEWDPPLEELQEM	1220.21	1197.25	22.96	1230	1081	149
Wild Type Peptide GVSEWDPILEELQEM, Peptide Substitution Scan (PEP201752521)	9	46	GVSEWDPPLEELQEM	1249.84	883.75	366.09	1255	825	430
Wild Type Peptide GVSEWDPILEELQEM, Peptide Substitution Scan (PEP201752521)	9	23	GVSEWDPQLEELQEM	1274.4	1002.33	272.07	1245	936	309	469	122.667	0.261549
Wild Type Peptide GVSEWDPILEELQEM, Peptide Substitution Scan (PEP201752521)	25	23	GVSEWDPQLEELQEM	1519.55	1197.25	322.3	1526	1081	445
Wild Type Peptide GVSEWDPILEELQEM, Peptide Substitution Scan (PEP201752521)	9	47	GVSEWDPQLEELQEM	1494.06	883.75	610.31	1478	825	653
Wild Type Peptide GVSEWDPILEELQEM, Peptide Substitution Scan (PEP201752521)	9	24	GVSEWDPRLEELQEM	1166.46	1002.33	164.14	1168	936	232	244.333	108.444	0.443838
Wild Type Peptide GVSEWDPILEELQEM, Peptide Substitution Scan (PEP201752521)	25	24	GVSEWDPRLEELQEM	1171.67	1197.25	0	1175	1081	94
Wild Type Peptide GVSEWDPILEELQEM, Peptide Substitution Scan (PEP201752521)	9	48	GVSEWDPRLEELQEM	1259	883.75	375.26	1232	825	407
Wild Type Peptide GVSEWDPILEELQEM, Peptide Substitution Scan (PEP201752521)	9	25	GVSEWDPSLEELQEM	1311.65	1002.33	309.33	1336	936	400	394.167	58.4444	0.148273
Wild Type Peptide GVSEWDPILEELQEM, Peptide Substitution Scan (PEP201752521)	25	25	GVSEWDPSLEELQEM	1399.39	1197.25	202.14	1387.5	1081	306.5
Wild Type Peptide GVSEWDPILEELQEM, Peptide Substitution Scan (PEP201752521)	9	49	GVSEWDPSLEELQEM	1331.5	883.75	447.75	1301	825	476
Wild Type Peptide GVSEWDPILEELQEM, Peptide Substitution Scan (PEP201752521)	9	26	GVSEWDPTLEELQEM	1348.71	1002.33	346.39	1353	936	417	441.667	49.5556	0.112201
Wild Type Peptide GVSEWDPILEELQEM, Peptide Substitution Scan (PEP201752521)	25	26	GVSEWDPTLEELQEM	1466.17	1197.25	268.92	1473	1081	392
Wild Type Peptide GVSEWDPILEELQEM, Peptide Substitution Scan (PEP201752521)	9	50	GVSEWDPTLEELQEM	1365.79	883.75	482.04	1341	825	516
Wild Type Peptide GVSEWDPILEELQEM, Peptide Substitution Scan (PEP201752521)	9	32	GVSEWDPULEELQEM	1112.03	1002.33	109.7	1088	936	152	215.333	145.778	0.676987
Wild Type Peptide GVSEWDPILEELQEM, Peptide Substitution Scan (PEP201752521)	25	32	GVSEWDPULEELQEM	1110.02	1197.25	0	1141	1081	60
Wild Type Peptide GVSEWDPILEELQEM, Peptide Substitution Scan (PEP201752521)	9	56	GVSEWDPULEELQEM	1216.01	883.75	332.26	1259	825	434
Wild Type Peptide GVSEWDPILEELQEM, Peptide Substitution Scan (PEP201752521)	9	27	GVSEWDPVLEELQEM	1730.02	1002.33	727.69	1712	936	776	850.5	115.333	0.135607
Wild Type Peptide GVSEWDPILEELQEM, Peptide Substitution Scan (PEP201752521)	25	27	GVSEWDPVLEELQEM	1828.2	1197.25	630.95	1833	1081	752
Wild Type Peptide GVSEWDPILEELQEM, Peptide Substitution Scan (PEP201752521)	9	51	GVSEWDPVLEELQEM	1854.63	883.75	970.89	1848.5	825	1023.5
Wild Type Peptide GVSEWDPILEELQEM, Peptide Substitution Scan (PEP201752521)	9	28	GVSEWDPWLEELQEM	3280.68	1002.33	2278.35	3298.5	936	2362.5	2864.83	334.889	0.116896
Wild Type Peptide GVSEWDPILEELQEM, Peptide Substitution Scan (PEP201752521)	25	28	GVSEWDPWLEELQEM	4111.7	1197.25	2914.45	4046	1081	2965
Wild Type Peptide GVSEWDPILEELQEM, Peptide Substitution Scan (PEP201752521)	9	52	GVSEWDPWLEELQEM	4176.17	883.75	3292.42	4092	825	3267
Wild Type Peptide GVSEWDPILEELQEM, Peptide Substitution Scan (PEP201752521)	9	29	GVSEWDPYLEELQEM	2588.3	1002.33	1585.98	2650	936	1714	2338.67	445.556	0.190517
Wild Type Peptide GVSEWDPILEELQEM, Peptide Substitution Scan (PEP201752521)	25	29	GVSEWDPYLEELQEM	3403.82	1197.25	2206.58	3376	1081	2295
Wild Type Peptide GVSEWDPILEELQEM, Peptide Substitution Scan (PEP201752521)	9	53	GVSEWDPYLEELQEM	3941.92	883.75	3058.17	3832	825	3007
Wild Type Peptide GVSEWDPILEELQEM, Peptide Substitution Scan (PEP201752521)	10	23	GVSEWDQILEELQEM	2452.43	1002.33	1450.1	2531	936	1595	1539.67	105.778	0.0687017
Wild Type Peptide GVSEWDPILEELQEM, Peptide Substitution Scan (PEP201752521)	26	23	GVSEWDQILEELQEM	2593.56	1197.25	1396.31	2462	1081	1381
Wild Type Peptide GVSEWDPILEELQEM, Peptide Substitution Scan (PEP201752521)	10	47	GVSEWDQILEELQEM	2490.51	883.75	1606.76	2468	825	1643
Wild Type Peptide GVSEWDPILEELQEM, Peptide Substitution Scan (PEP201752521)	10	24	GVSEWDRILEELQEM	1580.07	1002.33	577.75	1545	936	609	810.667	134.444	0.165844
Wild Type Peptide GVSEWDPILEELQEM, Peptide Substitution Scan (PEP201752521)	26	24	GVSEWDRILEELQEM	1920.11	1197.25	722.87	1919	1081	838
Wild Type Peptide GVSEWDPILEELQEM, Peptide Substitution Scan (PEP201752521)	10	48	GVSEWDRILEELQEM	1832.87	883.75	949.12	1810	825	985
Wild Type Peptide GVSEWDPILEELQEM, Peptide Substitution Scan (PEP201752521)	10	25	GVSEWDSILEELQEM	2176.88	1002.33	1174.55	2109	936	1173	1530.33	238.222	0.155667
Wild Type Peptide GVSEWDPILEELQEM, Peptide Substitution Scan (PEP201752521)	26	25	GVSEWDSILEELQEM	2711.96	1197.25	1514.72	2748	1081	1667
Wild Type Peptide GVSEWDPILEELQEM, Peptide Substitution Scan (PEP201752521)	10	49	GVSEWDSILEELQEM	2576.81	883.75	1693.06	2576	825	1751
Wild Type Peptide GVSEWDPILEELQEM, Peptide Substitution Scan (PEP201752521)	10	26	GVSEWDTILEELQEM	2498.22	1002.33	1495.89	2421.5	936	1485.5	1486.17	117.889	0.0793241
Wild Type Peptide GVSEWDPILEELQEM, Peptide Substitution Scan (PEP201752521)	26	26	GVSEWDTILEELQEM	2764.88	1197.25	1567.63	2744	1081	1663
Wild Type Peptide GVSEWDPILEELQEM, Peptide Substitution Scan (PEP201752521)	10	50	GVSEWDTILEELQEM	2253.14	883.75	1369.4	2135	825	1310
Wild Type Peptide GVSEWDPILEELQEM, Peptide Substitution Scan (PEP201752521)	10	32	GVSEWDUILEELQEM	1949.81	1002.33	947.48	1553.5	936	617.5	556	41	0.073741
Wild Type Peptide GVSEWDPILEELQEM, Peptide Substitution Scan (PEP201752521)	26	32	GVSEWDUILEELQEM	1820.43	1197.25	623.18	1589	1081	508
Wild Type Peptide GVSEWDPILEELQEM, Peptide Substitution Scan (PEP201752521)	10	56	GVSEWDUILEELQEM	1329.62	883.75	445.87	1367.5	825	542.5
Wild Type Peptide GVSEWDPILEELQEM, Peptide Substitution Scan (PEP201752521)	10	27	GVSEWDVILEELQEM	7294.5	1002.33	6292.17	7652	936	6716	6974.17	822.222	0.117895
Wild Type Peptide GVSEWDPILEELQEM, Peptide Substitution Scan (PEP201752521)	26	27	GVSEWDVILEELQEM	9250.24	1197.25	8052.99	9288.5	1081	8207.5
Wild Type Peptide GVSEWDPILEELQEM, Peptide Substitution Scan (PEP201752521)	10	51	GVSEWDVILEELQEM	6838.37	883.75	5954.62	6824	825	5999
Wild Type Peptide GVSEWDPILEELQEM, Peptide Substitution Scan (PEP201752521)	10	28	GVSEWDWILEELQEM	9740.76	1002.33	8738.43	9854	936	8918	9520	612	0.0642857
Wild Type Peptide GVSEWDPILEELQEM, Peptide Substitution Scan (PEP201752521)	26	28	GVSEWDWILEELQEM	9464.38	1197.25	8267.13	10285	1081	9204
Wild Type Peptide GVSEWDPILEELQEM, Peptide Substitution Scan (PEP201752521)	10	52	GVSEWDWILEELQEM	11208.6	883.75	10324.8	11263	825	10438
Wild Type Peptide GVSEWDPILEELQEM, Peptide Substitution Scan (PEP201752521)	10	29	GVSEWDYILEELQEM	12421	1002.33	11418.7	12763	936	11827	17372.3	4011.11	0.230891
Wild Type Peptide GVSEWDPILEELQEM, Peptide Substitution Scan (PEP201752521)	26	29	GVSEWDYILEELQEM	16800.4	1197.25	15603.1	17982	1081	16901
Wild Type Peptide GVSEWDPILEELQEM, Peptide Substitution Scan (PEP201752521)	10	53	GVSEWDYILEELQEM	23708.7	883.75	22824.9	24214	825	23389
Wild Type Peptide GVSEWDPILEELQEM, Peptide Substitution Scan (PEP201752521)	11	13	GVSEWEPILEELQEM	1868.65	1002.33	866.32	1860	936	924	1534	483.333	0.31508
Wild Type Peptide GVSEWDPILEELQEM, Peptide Substitution Scan (PEP201752521)	27	13	GVSEWEPILEELQEM	3405.06	1197.25	2207.81	3340	1081	2259
Wild Type Peptide GVSEWDPILEELQEM, Peptide Substitution Scan (PEP201752521)	11	37	GVSEWEPILEELQEM	2180.5	883.75	1296.75	2244	825	1419
Wild Type Peptide GVSEWDPILEELQEM, Peptide Substitution Scan (PEP201752521)	11	14	GVSEWFPILEELQEM	1163.96	1002.33	161.63	1145	936	209	253	149.333	0.59025
Wild Type Peptide GVSEWDPILEELQEM, Peptide Substitution Scan (PEP201752521)	27	14	GVSEWFPILEELQEM	1592.06	1197.25	394.81	1558	1081	477
Wild Type Peptide GVSEWDPILEELQEM, Peptide Substitution Scan (PEP201752521)	11	38	GVSEWFPILEELQEM	922.06	883.75	38.32	898	825	73
Wild Type Peptide GVSEWDPILEELQEM, Peptide Substitution Scan (PEP201752521)	11	15	GVSEWGPILEELQEM	996.48	1002.33	0	993	936	57	37.6667	13.7778	0.365782
Wild Type Peptide GVSEWDPILEELQEM, Peptide Substitution Scan (PEP201752521)	27	15	GVSEWGPILEELQEM	1085.64	1197.25	0	1098	1081	17
Wild Type Peptide GVSEWDPILEELQEM, Peptide Substitution Scan (PEP201752521)	11	39	GVSEWGPILEELQEM	921.71	883.75	37.96	864	825	39
Wild Type Peptide GVSEWDPILEELQEM, Peptide Substitution Scan (PEP201752521)	11	16	GVSEWHPILEELQEM	1002.6	1002.33	0.27	949	936	13	9	6	0.666667
Wild Type Peptide GVSEWDPILEELQEM, Peptide Substitution Scan (PEP201752521)	27	16	GVSEWHPILEELQEM	1043.54	1197.25	0	1043	1081	0
Wild Type Peptide GVSEWDPILEELQEM, Peptide Substitution Scan (PEP201752521)	11	40	GVSEWHPILEELQEM	837.46	883.75	0	839	825	14
Wild Type Peptide GVSEWDPILEELQEM, Peptide Substitution Scan (PEP201752521)	11	17	GVSEWIPILEELQEM	1212.82	1002.33	210.49	1194	936	258	296.833	51.7778	0.174434
Wild Type Peptide GVSEWDPILEELQEM, Peptide Substitution Scan (PEP201752521)	27	17	GVSEWIPILEELQEM	1304.51	1197.25	107.27	1339	1081	258
Wild Type Peptide GVSEWDPILEELQEM, Peptide Substitution Scan (PEP201752521)	11	41	GVSEWIPILEELQEM	1232.48	883.75	348.73	1199.5	825	374.5
Wild Type Peptide GVSEWDPILEELQEM, Peptide Substitution Scan (PEP201752521)	11	30	GVSEWZPILEELQEM	815.51	1002.33	0	793	936	0	0	0	0
Wild Type Peptide GVSEWDPILEELQEM, Peptide Substitution Scan (PEP201752521)	27	30	GVSEWZPILEELQEM	910.61	1197.25	0	899	1081	0
Wild Type Peptide GVSEWDPILEELQEM, Peptide Substitution Scan (PEP201752521)	11	54	GVSEWZPILEELQEM	809.48	883.75	0	795	825	0
Wild Type Peptide GVSEWDPILEELQEM, Peptide Substitution Scan (PEP201752521)	11	18	GVSEWKPILEELQEM	835.4	1002.33	0	835	936	0	0	0	0
Wild Type Peptide GVSEWDPILEELQEM, Peptide Substitution Scan (PEP201752521)	27	18	GVSEWKPILEELQEM	894.02	1197.25	0	864	1081	0
Wild Type Peptide GVSEWDPILEELQEM, Peptide Substitution Scan (PEP201752521)	11	42	GVSEWKPILEELQEM	798.8	883.75	0	787	825	0
Wild Type Peptide GVSEWDPILEELQEM, Peptide Substitution Scan (PEP201752521)	11	19	GVSEWLPILEELQEM	1004.58	1002.33	2.26	1018	936	82	107	47.3333	0.442368
Wild Type Peptide GVSEWDPILEELQEM, Peptide Substitution Scan (PEP201752521)	27	19	GVSEWLPILEELQEM	1266.49	1197.25	69.24	1259	1081	178
Wild Type Peptide GVSEWDPILEELQEM, Peptide Substitution Scan (PEP201752521)	11	43	GVSEWLPILEELQEM	923.95	883.75	40.2	886	825	61
Wild Type Peptide GVSEWDPILEELQEM, Peptide Substitution Scan (PEP201752521)	11	20	GVSEWMPILEELQEM	1016.88	1002.33	14.55	993	936	57	62.3333	45.1111	0.723708
Wild Type Peptide GVSEWDPILEELQEM, Peptide Substitution Scan (PEP201752521)	27	20	GVSEWMPILEELQEM	1076.83	1197.25	0	1061	1081	0
Wild Type Peptide GVSEWDPILEELQEM, Peptide Substitution Scan (PEP201752521)	11	44	GVSEWMPILEELQEM	955.1	883.75	71.35	955	825	130
Wild Type Peptide GVSEWDPILEELQEM, Peptide Substitution Scan (PEP201752521)	11	21	GVSEWNPILEELQEM	949.02	1002.33	0	951	936	15	8.66667	5.77778	0.666667
Wild Type Peptide GVSEWDPILEELQEM, Peptide Substitution Scan (PEP201752521)	27	21	GVSEWNPILEELQEM	1079.44	1197.25	0	1081	1081	0
Wild Type Peptide GVSEWDPILEELQEM, Peptide Substitution Scan (PEP201752521)	11	45	GVSEWNPILEELQEM	840.93	883.75	0	836	825	11
Wild Type Peptide GVSEWDPILEELQEM, Peptide Substitution Scan (PEP201752521)	11	31	GVSEWOPILEELQEM	699.71	1002.33	0	684	936	0	0	0	0
Wild Type Peptide GVSEWDPILEELQEM, Peptide Substitution Scan (PEP201752521)	27	31	GVSEWOPILEELQEM	789.12	1197.25	0	783	1081	0
Wild Type Peptide GVSEWDPILEELQEM, Peptide Substitution Scan (PEP201752521)	11	55	GVSEWOPILEELQEM	723.89	883.75	0	697	825	0
Wild Type Peptide GVSEWDPILEELQEM, Peptide Substitution Scan (PEP201752521)	11	22	GVSEWPPILEELQEM	910.85	1002.33	0	895	936	0	25	33.3333	1.33333
Wild Type Peptide GVSEWDPILEELQEM, Peptide Substitution Scan (PEP201752521)	27	22	GVSEWPPILEELQEM	1002.21	1197.25	0	978	1081	0
Wild Type Peptide GVSEWDPILEELQEM, Peptide Substitution Scan (PEP201752521)	11	46	GVSEWPPILEELQEM	935.73	883.75	51.98	900	825	75
Wild Type Peptide GVSEWDPILEELQEM, Peptide Substitution Scan (PEP201752521)	11	23	GVSEWQPILEELQEM	944	1002.33	0	947	936	11	47	44	0.93617
Wild Type Peptide GVSEWDPILEELQEM, Peptide Substitution Scan (PEP201752521)	27	23	GVSEWQPILEELQEM	1100.36	1197.25	0	1098	1081	17
Wild Type Peptide GVSEWDPILEELQEM, Peptide Substitution Scan (PEP201752521)	11	47	GVSEWQPILEELQEM	935.05	883.75	51.31	938	825	113
Wild Type Peptide GVSEWDPILEELQEM, Peptide Substitution Scan (PEP201752521)	11	24	GVSEWRPILEELQEM	842.06	1002.33	0	835	936	0	0	0	0
Wild Type Peptide GVSEWDPILEELQEM, Peptide Substitution Scan (PEP201752521)	27	24	GVSEWRPILEELQEM	874.84	1197.25	0	851	1081	0
Wild Type Peptide GVSEWDPILEELQEM, Peptide Substitution Scan (PEP201752521)	11	48	GVSEWRPILEELQEM	796.6	883.75	0	784	825	0
Wild Type Peptide GVSEWDPILEELQEM, Peptide Substitution Scan (PEP201752521)	11	25	GVSEWSPILEELQEM	902.83	1002.33	0	892	936	0	26.1667	34.8889	1.33333
Wild Type Peptide GVSEWDPILEELQEM, Peptide Substitution Scan (PEP201752521)	27	25	GVSEWSPILEELQEM	1008.19	1197.25	0	993	1081	0
Wild Type Peptide GVSEWDPILEELQEM, Peptide Substitution Scan (PEP201752521)	11	49	GVSEWSPILEELQEM	919.35	883.75	35.6	903.5	825	78.5
Wild Type Peptide GVSEWDPILEELQEM, Peptide Substitution Scan (PEP201752521)	11	26	GVSEWTPILEELQEM	1006.41	1002.33	4.09	980	936	44	90	68	0.755556
Wild Type Peptide GVSEWDPILEELQEM, Peptide Substitution Scan (PEP201752521)	27	26	GVSEWTPILEELQEM	1124.89	1197.25	0	1115	1081	34
Wild Type Peptide GVSEWDPILEELQEM, Peptide Substitution Scan (PEP201752521)	11	50	GVSEWTPILEELQEM	1068.64	883.75	184.89	1017	825	192
Wild Type Peptide GVSEWDPILEELQEM, Peptide Substitution Scan (PEP201752521)	11	32	GVSEWUPILEELQEM	735.85	1002.33	0	733	936	0	0	0	0
Wild Type Peptide GVSEWDPILEELQEM, Peptide Substitution Scan (PEP201752521)	27	32	GVSEWUPILEELQEM	894.36	1197.25	0	879	1081	0
Wild Type Peptide GVSEWDPILEELQEM, Peptide Substitution Scan (PEP201752521)	11	56	GVSEWUPILEELQEM	762.16	883.75	0	760	825	0
Wild Type Peptide GVSEWDPILEELQEM, Peptide Substitution Scan (PEP201752521)	11	27	GVSEWVPILEELQEM	1273.88	1002.33	271.56	1276	936	340	370.667	20.4444	0.0551559
Wild Type Peptide GVSEWDPILEELQEM, Peptide Substitution Scan (PEP201752521)	27	27	GVSEWVPILEELQEM	1505.54	1197.25	308.29	1469	1081	388
Wild Type Peptide GVSEWDPILEELQEM, Peptide Substitution Scan (PEP201752521)	11	51	GVSEWVPILEELQEM	1304.5	883.75	420.75	1209	825	384
Wild Type Peptide GVSEWDPILEELQEM, Peptide Substitution Scan (PEP201752521)	11	28	GVSEWWPILEELQEM	895.79	1002.33	0	902	936	0	39	52	1.33333
Wild Type Peptide GVSEWDPILEELQEM, Peptide Substitution Scan (PEP201752521)	27	28	GVSEWWPILEELQEM	1003.24	1197.25	0	972	1081	0
Wild Type Peptide GVSEWDPILEELQEM, Peptide Substitution Scan (PEP201752521)	11	52	GVSEWWPILEELQEM	973.32	883.75	89.57	942	825	117
Wild Type Peptide GVSEWDPILEELQEM, Peptide Substitution Scan (PEP201752521)	11	29	GVSEWYPILEELQEM	1171.82	1002.33	169.49	1174	936	238	343	133.333	0.388727
Wild Type Peptide GVSEWDPILEELQEM, Peptide Substitution Scan (PEP201752521)	27	29	GVSEWYPILEELQEM	1329.19	1197.25	131.95	1329	1081	248
Wild Type Peptide GVSEWDPILEELQEM, Peptide Substitution Scan (PEP201752521)	11	53	GVSEWYPILEELQEM	1345.41	883.75	461.67	1368	825	543
Wild Type Peptide GVSEWDPILEELQEM, Peptide Substitution Scan (PEP201752521)	12	29	GVSEYDPILEELQEM	1168.2	1002.33	165.88	1178	936	242	411	188	0.457421
Wild Type Peptide GVSEWDPILEELQEM, Peptide Substitution Scan (PEP201752521)	28	29	GVSEYDPILEELQEM	1414.06	1197.25	216.81	1379	1081	298
Wild Type Peptide GVSEWDPILEELQEM, Peptide Substitution Scan (PEP201752521)	12	53	GVSEYDPILEELQEM	1587.6	883.75	703.85	1518	825	693
Wild Type Peptide GVSEWDPILEELQEM, Peptide Substitution Scan (PEP201752521)	13	14	GVSFWDPILEELQEM	1308.41	1002.33	306.09	1288	936	352	294.333	116.889	0.397131
Wild Type Peptide GVSEWDPILEELQEM, Peptide Substitution Scan (PEP201752521)	29	14	GVSFWDPILEELQEM	1497.32	1197.25	300.07	1493	1081	412
Wild Type Peptide GVSEWDPILEELQEM, Peptide Substitution Scan (PEP201752521)	13	38	GVSFWDPILEELQEM	959.56	883.75	75.82	944	825	119
Wild Type Peptide GVSEWDPILEELQEM, Peptide Substitution Scan (PEP201752521)	13	15	GVSGWDPILEELQEM	1378.73	1002.33	376.4	1378	936	442	415	66.6667	0.160643
Wild Type Peptide GVSEWDPILEELQEM, Peptide Substitution Scan (PEP201752521)	29	15	GVSGWDPILEELQEM	1609.45	1197.25	412.21	1569	1081	488
Wild Type Peptide GVSEWDPILEELQEM, Peptide Substitution Scan (PEP201752521)	13	39	GVSGWDPILEELQEM	1158.82	883.75	275.07	1140	825	315
Wild Type Peptide GVSEWDPILEELQEM, Peptide Substitution Scan (PEP201752521)	13	16	GVSHWDPILEELQEM	1201.31	1002.33	198.99	1186	936	250	230	13.3333	0.057971
Wild Type Peptide GVSEWDPILEELQEM, Peptide Substitution Scan (PEP201752521)	29	16	GVSHWDPILEELQEM	1328.4	1197.25	131.15	1305	1081	224
Wild Type Peptide GVSEWDPILEELQEM, Peptide Substitution Scan (PEP201752521)	13	40	GVSHWDPILEELQEM	1051.16	883.75	167.41	1041	825	216
Wild Type Peptide GVSEWDPILEELQEM, Peptide Substitution Scan (PEP201752521)	13	17	GVSIWDPILEELQEM	1206.08	1002.33	203.76	1205	936	269	324	47.3333	0.146091
Wild Type Peptide GVSEWDPILEELQEM, Peptide Substitution Scan (PEP201752521)	29	17	GVSIWDPILEELQEM	1554.9	1197.25	357.65	1476	1081	395
Wild Type Peptide GVSEWDPILEELQEM, Peptide Substitution Scan (PEP201752521)	13	41	GVSIWDPILEELQEM	1115.81	883.75	232.06	1133	825	308
Wild Type Peptide GVSEWDPILEELQEM, Peptide Substitution Scan (PEP201752521)	13	30	GVSZWDPILEELQEM	1072.78	1002.33	70.46	1064	936	128	170.667	116.889	0.684896
Wild Type Peptide GVSEWDPILEELQEM, Peptide Substitution Scan (PEP201752521)	29	30	GVSZWDPILEELQEM	1142.3	1197.25	0	1119	1081	38
Wild Type Peptide GVSEWDPILEELQEM, Peptide Substitution Scan (PEP201752521)	13	54	GVSZWDPILEELQEM	1136.46	883.75	252.71	1171	825	346
Wild Type Peptide GVSEWDPILEELQEM, Peptide Substitution Scan (PEP201752521)	13	18	GVSKWDPILEELQEM	1126.96	1002.33	124.64	1068	936	132	159.667	42.2222	0.26444
Wild Type Peptide GVSEWDPILEELQEM, Peptide Substitution Scan (PEP201752521)	29	18	GVSKWDPILEELQEM	1292.45	1197.25	95.2	1304	1081	223
Wild Type Peptide GVSEWDPILEELQEM, Peptide Substitution Scan (PEP201752521)	13	42	GVSKWDPILEELQEM	937.2	883.75	53.45	949	825	124
Wild Type Peptide GVSEWDPILEELQEM, Peptide Substitution Scan (PEP201752521)	13	19	GVSLWDPILEELQEM	1146.78	1002.33	144.45	1079	936	143	195	74	0.379487
Wild Type Peptide GVSEWDPILEELQEM, Peptide Substitution Scan (PEP201752521)	29	19	GVSLWDPILEELQEM	1247.17	1197.25	49.92	1217	1081	136
Wild Type Peptide GVSEWDPILEELQEM, Peptide Substitution Scan (PEP201752521)	13	43	GVSLWDPILEELQEM	1173.17	883.75	289.42	1131	825	306
Wild Type Peptide GVSEWDPILEELQEM, Peptide Substitution Scan (PEP201752521)	13	20	GVSMWDPILEELQEM	1115.64	1002.33	113.31	1133	936	197	197	44	0.22335
Wild Type Peptide GVSEWDPILEELQEM, Peptide Substitution Scan (PEP201752521)	29	20	GVSMWDPILEELQEM	1262.24	1197.25	64.99	1212	1081	131
Wild Type Peptide GVSEWDPILEELQEM, Peptide Substitution Scan (PEP201752521)	13	44	GVSMWDPILEELQEM	1089.31	883.75	205.56	1088	825	263
Wild Type Peptide GVSEWDPILEELQEM, Peptide Substitution Scan (PEP201752521)	13	21	GVSNWDPILEELQEM	1129.89	1002.33	127.56	1133	936	197	245	107.333	0.438095
Wild Type Peptide GVSEWDPILEELQEM, Peptide Substitution Scan (PEP201752521)	29	21	GVSNWDPILEELQEM	1234.21	1197.25	36.96	1213	1081	132
Wild Type Peptide GVSEWDPILEELQEM, Peptide Substitution Scan (PEP201752521)	13	45	GVSNWDPILEELQEM	1257.11	883.75	373.36	1231	825	406
Wild Type Peptide GVSEWDPILEELQEM, Peptide Substitution Scan (PEP201752521)	13	31	GVSOWDPILEELQEM	1013.33	1002.33	11	1010	936	74	138	122	0.884058
Wild Type Peptide GVSEWDPILEELQEM, Peptide Substitution Scan (PEP201752521)	29	31	GVSOWDPILEELQEM	1097.58	1197.25	0	1100	1081	19
Wild Type Peptide GVSEWDPILEELQEM, Peptide Substitution Scan (PEP201752521)	13	55	GVSOWDPILEELQEM	1175.95	883.75	292.2	1146	825	321
Wild Type Peptide GVSEWDPILEELQEM, Peptide Substitution Scan (PEP201752521)	13	22	GVSPWDPILEELQEM	1189.91	1002.33	187.58	1175	936	239	250.833	82.7778	0.330011
Wild Type Peptide GVSEWDPILEELQEM, Peptide Substitution Scan (PEP201752521)	29	22	GVSPWDPILEELQEM	1249.66	1197.25	52.41	1219.5	1081	138.5
Wild Type Peptide GVSEWDPILEELQEM, Peptide Substitution Scan (PEP201752521)	13	46	GVSPWDPILEELQEM	1180.83	883.75	297.08	1200	825	375
Wild Type Peptide GVSEWDPILEELQEM, Peptide Substitution Scan (PEP201752521)	13	23	GVSQWDPILEELQEM	1126.46	1002.33	124.13	1120	936	184	262.5	52.3333	0.199365
Wild Type Peptide GVSEWDPILEELQEM, Peptide Substitution Scan (PEP201752521)	29	23	GVSQWDPILEELQEM	1378.75	1197.25	181.51	1415	1081	334
Wild Type Peptide GVSEWDPILEELQEM, Peptide Substitution Scan (PEP201752521)	13	47	GVSQWDPILEELQEM	1110.98	883.75	227.23	1094.5	825	269.5
Wild Type Peptide GVSEWDPILEELQEM, Peptide Substitution Scan (PEP201752521)	13	24	GVSRWDPILEELQEM	1093.18	1002.33	90.86	1081	936	145	181.333	31.7778	0.175245
Wild Type Peptide GVSEWDPILEELQEM, Peptide Substitution Scan (PEP201752521)	29	24	GVSRWDPILEELQEM	1253.25	1197.25	56	1251	1081	170
Wild Type Peptide GVSEWDPILEELQEM, Peptide Substitution Scan (PEP201752521)	13	48	GVSRWDPILEELQEM	1066.82	883.75	183.07	1054	825	229
Wild Type Peptide GVSEWDPILEELQEM, Peptide Substitution Scan (PEP201752521)	13	25	GVSSWDPILEELQEM	1141.82	1002.33	139.49	1148	936	212	291	52.6667	0.180985
Wild Type Peptide GVSEWDPILEELQEM, Peptide Substitution Scan (PEP201752521)	29	25	GVSSWDPILEELQEM	1359.61	1197.25	162.36	1377	1081	296
Wild Type Peptide GVSEWDPILEELQEM, Peptide Substitution Scan (PEP201752521)	13	49	GVSSWDPILEELQEM	1218.14	883.75	334.39	1190	825	365
Wild Type Peptide GVSEWDPILEELQEM, Peptide Substitution Scan (PEP201752521)	13	26	GVSTWDPILEELQEM	1174.68	1002.33	172.36	1125	936	189	223.667	82.8889	0.370591
Wild Type Peptide GVSEWDPILEELQEM, Peptide Substitution Scan (PEP201752521)	29	26	GVSTWDPILEELQEM	1271.35	1197.25	74.11	1215	1081	134
Wild Type Peptide GVSEWDPILEELQEM, Peptide Substitution Scan (PEP201752521)	13	50	GVSTWDPILEELQEM	1166.4	883.75	282.65	1173	825	348
Wild Type Peptide GVSEWDPILEELQEM, Peptide Substitution Scan (PEP201752521)	13	32	GVSUWDPILEELQEM	1167.52	1002.33	165.19	1148	936	212	187.667	64.4444	0.343398
Wild Type Peptide GVSEWDPILEELQEM, Peptide Substitution Scan (PEP201752521)	29	32	GVSUWDPILEELQEM	1172.98	1197.25	0	1172	1081	91
Wild Type Peptide GVSEWDPILEELQEM, Peptide Substitution Scan (PEP201752521)	13	56	GVSUWDPILEELQEM	1088.93	883.75	205.18	1085	825	260
Wild Type Peptide GVSEWDPILEELQEM, Peptide Substitution Scan (PEP201752521)	13	27	GVSVWDPILEELQEM	1207.85	1002.33	205.52	1211	936	275	282.333	64.4444	0.228257
Wild Type Peptide GVSEWDPILEELQEM, Peptide Substitution Scan (PEP201752521)	29	27	GVSVWDPILEELQEM	1327.03	1197.25	129.78	1274	1081	193
Wild Type Peptide GVSEWDPILEELQEM, Peptide Substitution Scan (PEP201752521)	13	51	GVSVWDPILEELQEM	1263.15	883.75	379.4	1204	825	379
Wild Type Peptide GVSEWDPILEELQEM, Peptide Substitution Scan (PEP201752521)	13	28	GVSWWDPILEELQEM	1239.21	1002.33	236.88	1249	936	313	356.5	29	0.0813464
Wild Type Peptide GVSEWDPILEELQEM, Peptide Substitution Scan (PEP201752521)	29	28	GVSWWDPILEELQEM	1485.49	1197.25	288.24	1444	1081	363
Wild Type Peptide GVSEWDPILEELQEM, Peptide Substitution Scan (PEP201752521)	13	52	GVSWWDPILEELQEM	1250.84	883.75	367.09	1218.5	825	393.5
Wild Type Peptide GVSEWDPILEELQEM, Peptide Substitution Scan (PEP201752521)	13	29	GVSYWDPILEELQEM	1146.09	1002.33	143.76	1118	936	182	286.667	200.889	0.700775
Wild Type Peptide GVSEWDPILEELQEM, Peptide Substitution Scan (PEP201752521)	29	29	GVSYWDPILEELQEM	1161.89	1197.25	0	1171	1081	90
Wild Type Peptide GVSEWDPILEELQEM, Peptide Substitution Scan (PEP201752521)	13	53	GVSYWDPILEELQEM	1381.49	883.75	497.74	1413	825	588
Wild Type Peptide GVSEWDPILEELQEM, Peptide Substitution Scan (PEP201752521)	14	26	GVTEWDPILEELQEM	2071.54	1002.33	1069.21	2069	936	1133	1333.67	133.778	0.100308
Wild Type Peptide GVSEWDPILEELQEM, Peptide Substitution Scan (PEP201752521)	30	26	GVTEWDPILEELQEM	2573.04	1197.25	1375.79	2593	1081	1512
Wild Type Peptide GVSEWDPILEELQEM, Peptide Substitution Scan (PEP201752521)	14	50	GVTEWDPILEELQEM	2172.21	883.75	1288.46	2181	825	1356
Wild Type Peptide GVSEWDPILEELQEM, Peptide Substitution Scan (PEP201752521)	14	32	GVUEWDPILEELQEM	1942.31	1002.33	939.98	1970	936	1034	1322	206.667	0.156329
Wild Type Peptide GVSEWDPILEELQEM, Peptide Substitution Scan (PEP201752521)	30	32	GVUEWDPILEELQEM	3344.34	1197.25	2147.09	2713	1081	1632
Wild Type Peptide GVSEWDPILEELQEM, Peptide Substitution Scan (PEP201752521)	14	56	GVUEWDPILEELQEM	2183.99	883.75	1300.24	2125	825	1300
Wild Type Peptide GVSEWDPILEELQEM, Peptide Substitution Scan (PEP201752521)	14	27	GVVEWDPILEELQEM	2067.05	1002.33	1064.72	2066	936	1130	1544.33	316.111	0.204691
Wild Type Peptide GVSEWDPILEELQEM, Peptide Substitution Scan (PEP201752521)	30	27	GVVEWDPILEELQEM	2553.12	1197.25	1355.87	2565.5	1081	1484.5
Wild Type Peptide GVSEWDPILEELQEM, Peptide Substitution Scan (PEP201752521)	14	51	GVVEWDPILEELQEM	2751.9	883.75	1868.15	2843.5	825	2018.5
Wild Type Peptide GVSEWDPILEELQEM, Peptide Substitution Scan (PEP201752521)	14	28	GVWEWDPILEELQEM	3159.87	1002.33	2157.55	3070	936	2134	3385	834	0.246381
Wild Type Peptide GVSEWDPILEELQEM, Peptide Substitution Scan (PEP201752521)	30	28	GVWEWDPILEELQEM	5371.17	1197.25	4173.92	5341	1081	4260
Wild Type Peptide GVSEWDPILEELQEM, Peptide Substitution Scan (PEP201752521)	14	52	GVWEWDPILEELQEM	4648.46	883.75	3764.71	4586	825	3761
Wild Type Peptide GVSEWDPILEELQEM, Peptide Substitution Scan (PEP201752521)	14	29	GVYEWDPILEELQEM	2487.52	1002.33	1485.19	2507	936	1571	1998.67	549.556	0.274961
Wild Type Peptide GVSEWDPILEELQEM, Peptide Substitution Scan (PEP201752521)	30	29	GVYEWDPILEELQEM	2942.71	1197.25	1745.46	2683	1081	1602
Wild Type Peptide GVSEWDPILEELQEM, Peptide Substitution Scan (PEP201752521)	14	53	GVYEWDPILEELQEM	3958.08	883.75	3074.33	3648	825	2823
Wild Type Peptide GVSEWDPILEELQEM, Peptide Substitution Scan (PEP201752521)	15	28	GWSEWDPILEELQEM	3235.8	1002.33	2233.48	3181.5	936	2245.5	3032	524.333	0.172933
Wild Type Peptide GVSEWDPILEELQEM, Peptide Substitution Scan (PEP201752521)	31	28	GWSEWDPILEELQEM	4684.52	1197.25	3487.27	4794.5	1081	3713.5
Wild Type Peptide GVSEWDPILEELQEM, Peptide Substitution Scan (PEP201752521)	15	52	GWSEWDPILEELQEM	4421.92	883.75	3538.17	3962	825	3137
Wild Type Peptide GVSEWDPILEELQEM, Peptide Substitution Scan (PEP201752521)	15	29	GYSEWDPILEELQEM	2330.63	1002.33	1328.3	2306.5	936	1370.5	2284.67	661.222	0.289417
Wild Type Peptide GVSEWDPILEELQEM, Peptide Substitution Scan (PEP201752521)	31	29	GYSEWDPILEELQEM	3334.54	1197.25	2137.29	3288	1081	2207
Wild Type Peptide GVSEWDPILEELQEM, Peptide Substitution Scan (PEP201752521)	15	53	GYSEWDPILEELQEM	4923.05	883.75	4039.3	4101.5	825	3276.5
Wild Type Peptide GVSEWDPILEELQEM, Peptide Substitution Scan (PEP201752521)	16	16	HVSEWDPILEELQEM	2720.74	1002.33	1718.41	2417.5	936	1481.5	1591.83	495.444	0.311241
Wild Type Peptide GVSEWDPILEELQEM, Peptide Substitution Scan (PEP201752521)	32	16	HVSEWDPILEELQEM	3555.09	1197.25	2357.84	3416	1081	2335
Wild Type Peptide GVSEWDPILEELQEM, Peptide Substitution Scan (PEP201752521)	16	40	HVSEWDPILEELQEM	1972.83	883.75	1089.08	1784	825	959
Wild Type Peptide GVSEWDPILEELQEM, Deletion Series (PEP201752521)	18	56	ILEELQEM	936.09	825.98	110.11	905	701	204	200.667	5.77778	0.0287929
Wild Type Peptide GVSEWDPILEELQEM, Deletion Series (PEP201752521)	19	56	ILEELQEM	910.57	825.98	84.59	907	701	206
Wild Type Peptide GVSEWDPILEELQEM, Deletion Series (PEP201752521)	20	56	ILEELQEM	906.92	825.98	80.94	893	701	192
Wild Type Peptide GVSEWDPILEELQEM, Peptide Substitution Scan (PEP201752521)	16	17	IVSEWDPILEELQEM	2699.94	1002.33	1697.61	2759	936	1823	2158.67	575.556	0.266625
Wild Type Peptide GVSEWDPILEELQEM, Peptide Substitution Scan (PEP201752521)	32	17	IVSEWDPILEELQEM	4272.5	1197.25	3075.25	4103	1081	3022
Wild Type Peptide GVSEWDPILEELQEM, Peptide Substitution Scan (PEP201752521)	16	41	IVSEWDPILEELQEM	2426.04	883.75	1542.29	2456	825	1631
Wild Type Peptide GVSEWDPILEELQEM, Peptide Substitution Scan (PEP201752521)	16	30	ZVSEWDPILEELQEM	2790.43	1002.33	1788.11	2812.5	936	1876.5	2066.17	230.889	0.111747
Wild Type Peptide GVSEWDPILEELQEM, Peptide Substitution Scan (PEP201752521)	32	30	ZVSEWDPILEELQEM	2962.81	1197.25	1765.57	2990.5	1081	1909.5
Wild Type Peptide GVSEWDPILEELQEM, Peptide Substitution Scan (PEP201752521)	16	54	ZVSEWDPILEELQEM	3420.09	883.75	2536.34	3237.5	825	2412.5
E Scan of Control Peptide KPLDFDWEIVLEEQM (PEP201752521) (PEP201752521)	22	35	KELDFDWEIVLEEQM	28661.9	4923.82	23738.1	31641	3424	28217	24631.2	2390.56	0.0970541
E Scan of Control Peptide KPLDFDWEIVLEEQM (PEP201752521) (PEP201752521)	23	35	KELDFDWEIVLEEQM	22635.3	4923.82	17711.5	24531	3424	21107
E Scan of Control Peptide KPLDFDWEIVLEEQM (PEP201752521) (PEP201752521)	24	35	KELDFDWEIVLEEQM	26896.5	4923.82	21972.7	27993.5	3424	24569.5
E Scan of Control Peptide KPLDFDWEIVLEEQM (PEP201752521) (PEP201752521)	22	36	KPEDFDWEIVLEEQM	22157.1	4923.82	17233.3	22674	3424	19250	25805.5	4370.33	0.169357
E Scan of Control Peptide KPLDFDWEIVLEEQM (PEP201752521) (PEP201752521)	23	36	KPEDFDWEIVLEEQM	28916.3	4923.82	23992.5	30788.5	3424	27364.5
E Scan of Control Peptide KPLDFDWEIVLEEQM (PEP201752521) (PEP201752521)	24	36	KPEDFDWEIVLEEQM	31378.2	4923.82	26454.4	34226	3424	30802
E Scan of Control Peptide KPLDFDWEIVLEEQM (PEP201752521) (PEP201752521)	22	38	KPLDEDWEIVLEEQM	30476.2	4923.82	25552.4	34188	3424	30764	31093.5	1592.67	0.0512219
E Scan of Control Peptide KPLDFDWEIVLEEQM (PEP201752521) (PEP201752521)	23	38	KPLDEDWEIVLEEQM	29442	4923.82	24518.2	32458	3424	29034
E Scan of Control Peptide KPLDFDWEIVLEEQM (PEP201752521) (PEP201752521)	24	38	KPLDEDWEIVLEEQM	32501.6	4923.82	27577.7	36906.5	3424	33482.5
E Scan of Control Peptide KPLDFDWEIVLEEQM (PEP201752521) (PEP201752521)	22	40	KPLDFDEEIVLEEQM	4411.43	4923.82	0	4449	3424	1025	961	85.3333	0.0887964
E Scan of Control Peptide KPLDFDWEIVLEEQM (PEP201752521) (PEP201752521)	23	40	KPLDFDEEIVLEEQM	4500.65	4923.82	0	4257	3424	833
E Scan of Control Peptide KPLDFDWEIVLEEQM (PEP201752521) (PEP201752521)	24	40	KPLDFDEEIVLEEQM	4711.44	4923.82	0	4449	3424	1025
E Scan of Control Peptide KPLDFDWEIVLEEQM (PEP201752521) (PEP201752521)	22	42	KPLDFDWEEVLEEQM	16544.9	4923.82	11621.1	18267	3424	14843	13684.3	1910.22	0.139592
E Scan of Control Peptide KPLDFDWEIVLEEQM (PEP201752521) (PEP201752521)	23	42	KPLDFDWEEVLEEQM	17071.8	4923.82	12148	18815	3424	15391
E Scan of Control Peptide KPLDFDWEIVLEEQM (PEP201752521) (PEP201752521)	24	42	KPLDFDWEEVLEEQM	14205.6	4923.82	9281.76	14243	3424	10819
E Scan of Control Peptide KPLDFDWEIVLEEQM (PEP201752521) (PEP201752521)	22	43	KPLDFDWEIELEEQM	15924.8	4923.82	11001	17248	3424	13824	11928.7	1459.11	0.12232
E Scan of Control Peptide KPLDFDWEIVLEEQM (PEP201752521) (PEP201752521)	23	43	KPLDFDWEIELEEQM	13021.6	4923.82	8097.8	13164	3424	9740
E Scan of Control Peptide KPLDFDWEIVLEEQM (PEP201752521) (PEP201752521)	24	43	KPLDFDWEIELEEQM	14064.3	4923.82	9140.53	15646	3424	12222
E Scan of Control Peptide KPLDFDWEIVLEEQM (PEP201752521) (PEP201752521)	22	44	KPLDFDWEIVEEEQM	25148.8	4923.82	20225	28794	3424	25370	24065.8	1347.22	0.0559807
E Scan of Control Peptide KPLDFDWEIVLEEQM (PEP201752521) (PEP201752521)	23	44	KPLDFDWEIVEEEQM	23372.6	4923.82	18448.8	25469	3424	22045
E Scan of Control Peptide KPLDFDWEIVLEEQM (PEP201752521) (PEP201752521)	24	44	KPLDFDWEIVEEEQM	25600.4	4923.82	20676.6	28206.5	3424	24782.5
E Scan of Control Peptide KPLDFDWEIVLEEQM (PEP201752521) (PEP201752521)	22	47	KPLDFDWEIVLEEEM	36690.9	4923.82	31767.1	39705.5	3424	36281.5	31794.2	2991.56	0.0940913
E Scan of Control Peptide KPLDFDWEIVLEEQM (PEP201752521) (PEP201752521)	23	47	KPLDFDWEIVLEEEM	30993.5	4923.82	26069.7	34037	3424	30613
E Scan of Control Peptide KPLDFDWEIVLEEQM (PEP201752521) (PEP201752521)	24	47	KPLDFDWEIVLEEEM	29475.5	4923.82	24551.7	31912	3424	28488
E Scan of Control Peptide KPLDFDWEIVLEEQM (PEP201752521) (PEP201752521)	22	48	KPLDFDWEIVLEEQE	34231.1	4923.82	29307.3	37221.5	3424	33797.5	29670.5	2751.33	0.0927296
E Scan of Control Peptide KPLDFDWEIVLEEQM (PEP201752521) (PEP201752521)	23	48	KPLDFDWEIVLEEQE	29950.1	4923.82	25026.3	30415	3424	26991
E Scan of Control Peptide KPLDFDWEIVLEEQM (PEP201752521) (PEP201752521)	24	48	KPLDFDWEIVLEEQE	28671.2	4923.82	23747.3	31647	3424	28223
Control Peptide KPLDFDWEIVLEEQM (PEP201752521)	17	10	KPLDFDWEIVLEEQM	45839.9	1651.8	44188.1	49899.5	1394	48505.5	36407	10677.1	0.293271
Control Peptide KPLDFDWEIVLEEQM (PEP201752521)	17	12	KPLDFDWEIVLEEQM	43182.2	1651.8	41530.4	44478	1394	43084
Control Peptide KPLDFDWEIVLEEQM (PEP201752521)	17	14	KPLDFDWEIVLEEQM	34956.9	1651.8	33305.1	37919.5	1394	36525.5
Control Peptide KPLDFDWEIVLEEQM (PEP201752521)	17	16	KPLDFDWEIVLEEQM	47859	1651.8	46207.2	48512	1394	47118
Control Peptide KPLDFDWEIVLEEQM (PEP201752521)	17	18	KPLDFDWEIVLEEQM	34087.1	1651.8	32435.3	36565	1394	35171
Control Peptide KPLDFDWEIVLEEQM (PEP201752521)	17	55	KPLDFDWEIVLEEQM	52552.4	1022.12	51530.3	55788	749	55039
Control Peptide KPLDFDWEIVLEEQM (PEP201752521)	17	57	KPLDFDWEIVLEEQM	42551.3	1022.12	41529.2	43040.5	749	42291.5
Control Peptide KPLDFDWEIVLEEQM (PEP201752521)	17	59	KPLDFDWEIVLEEQM	39207.3	1022.12	38185.2	38414.5	749	37665.5
Control Peptide KPLDFDWEIVLEEQM (PEP201752521)	17	61	KPLDFDWEIVLEEQM	45614.3	1022.12	44592.2	47273	749	46524
Control Peptide KPLDFDWEIVLEEQM (PEP201752521)	17	63	KPLDFDWEIVLEEQM	35190.6	1022.12	34168.5	36030	749	35281
Control Peptide KPLDFDWEIVLEEQM (PEP201752521)	2	33	KPLDFDWEIVLEEQM	41994.3	1915.9	40078.4	45175	1451	43724
Control Peptide KPLDFDWEIVLEEQM (PEP201752521)	4	33	KPLDFDWEIVLEEQM	47749.3	1915.9	45833.4	48857.5	1451	47406.5
Control Peptide KPLDFDWEIVLEEQM (PEP201752521)	6	33	KPLDFDWEIVLEEQM	50569.7	1915.9	48653.8	54755	1451	53304
Control Peptide KPLDFDWEIVLEEQM (PEP201752521)	8	33	KPLDFDWEIVLEEQM	49835.2	1915.9	47919.3	52274.5	1451	50823.5
Control Peptide KPLDFDWEIVLEEQM (PEP201752521)	10	33	KPLDFDWEIVLEEQM	39039.8	1915.9	37123.9	40904	1451	39453
Control Peptide KPLDFDWEIVLEEQM (PEP201752521)	24	33	KPLDFDWEIVLEEQM	23592.4	1836.74	21755.6	25045	961	24084
Control Peptide KPLDFDWEIVLEEQM (PEP201752521)	26	33	KPLDFDWEIVLEEQM	28768.4	1836.74	26931.6	30299	961	29338
Control Peptide KPLDFDWEIVLEEQM (PEP201752521)	28	33	KPLDFDWEIVLEEQM	38178.1	1836.74	36341.4	36708	961	35747
Control Peptide KPLDFDWEIVLEEQM (PEP201752521)	30	33	KPLDFDWEIVLEEQM	45030.5	1836.74	43193.7	45846	961	44885
Control Peptide KPLDFDWEIVLEEQM (PEP201752521)	32	33	KPLDFDWEIVLEEQM	56733.4	1836.74	54896.7	65535	961	64574
E Scan of Control Peptide KPLDFDWEIVLEEQM (PEP201752521) (PEP201752521)	22	41	KPLDFDWEIVLEEQM	21926.9	4923.82	17003.1	24599	3424	21175
E Scan of Control Peptide KPLDFDWEIVLEEQM (PEP201752521) (PEP201752521)	22	45	KPLDFDWEIVLEEQM	23662.9	4923.82	18739.1	25865	3424	22441
E Scan of Control Peptide KPLDFDWEIVLEEQM (PEP201752521) (PEP201752521)	22	46	KPLDFDWEIVLEEQM	28737	4923.82	23813.1	29654	3424	26230
E Scan of Control Peptide KPLDFDWEIVLEEQM (PEP201752521) (PEP201752521)	23	41	KPLDFDWEIVLEEQM	22383.5	4923.82	17459.7	25144.5	3424	21720.5
E Scan of Control Peptide KPLDFDWEIVLEEQM (PEP201752521) (PEP201752521)	23	45	KPLDFDWEIVLEEQM	21008.5	4923.82	16084.7	22351	3424	18927
E Scan of Control Peptide KPLDFDWEIVLEEQM (PEP201752521) (PEP201752521)	23	46	KPLDFDWEIVLEEQM	25461.9	4923.82	20538	27076	3424	23652
E Scan of Control Peptide KPLDFDWEIVLEEQM (PEP201752521) (PEP201752521)	24	41	KPLDFDWEIVLEEQM	21621.7	4923.82	16697.9	22011	3424	18587
E Scan of Control Peptide KPLDFDWEIVLEEQM (PEP201752521) (PEP201752521)	24	45	KPLDFDWEIVLEEQM	22617	4923.82	17693.2	24628	3424	21204
E Scan of Control Peptide KPLDFDWEIVLEEQM (PEP201752521) (PEP201752521)	24	46	KPLDFDWEIVLEEQM	23850.7	4923.82	18926.9	24746	3424	21322
E Scan of Control Peptide KPLDFDWEIVLEEQM (PEP201752521) (PEP201752521)	22	39	KPLDFEWEIVLEEQM	28366	4923.82	23442.2	31255.5	3424	27831.5	25003.2	1885.56	0.0754127
E Scan of Control Peptide KPLDFDWEIVLEEQM (PEP201752521) (PEP201752521)	23	39	KPLDFEWEIVLEEQM	23643	4923.82	18719.2	25975.5	3424	22551.5
E Scan of Control Peptide KPLDFDWEIVLEEQM (PEP201752521) (PEP201752521)	24	39	KPLDFEWEIVLEEQM	26189	4923.82	21265.2	28050.5	3424	24626.5
E Scan of Control Peptide KPLDFDWEIVLEEQM (PEP201752521) (PEP201752521)	22	37	KPLEFDWEIVLEEQM	21232.1	4923.82	16308.2	22255.5	3424	18831.5	22043.2	2141.11	0.0971326
E Scan of Control Peptide KPLDFDWEIVLEEQM (PEP201752521) (PEP201752521)	23	37	KPLEFDWEIVLEEQM	25224.6	4923.82	20300.8	26939	3424	23515
E Scan of Control Peptide KPLDFDWEIVLEEQM (PEP201752521) (PEP201752521)	24	37	KPLEFDWEIVLEEQM	25577.9	4923.82	20654.1	27207	3424	23783
Wild Type Peptide GVSEWDPILEELQEM, Peptide Substitution Scan (PEP201752521)	16	18	KVSEWDPILEELQEM	2493.97	1002.33	1491.65	2517	936	1581	1405.67	116.889	0.0831555
Wild Type Peptide GVSEWDPILEELQEM, Peptide Substitution Scan (PEP201752521)	32	18	KVSEWDPILEELQEM	2408.93	1197.25	1211.68	2396	1081	1315
Wild Type Peptide GVSEWDPILEELQEM, Peptide Substitution Scan (PEP201752521)	16	42	KVSEWDPILEELQEM	2109.26	883.75	1225.51	2146	825	1321
Wild Type Peptide GVSEWDPILEELQEM, Deletion Series (PEP201752521)	18	57	LEELQEM	859.37	825.98	33.39	848	701	147	188.333	27.5556	0.146313
Wild Type Peptide GVSEWDPILEELQEM, Deletion Series (PEP201752521)	19	57	LEELQEM	919.63	825.98	93.65	911	701	210
Wild Type Peptide GVSEWDPILEELQEM, Deletion Series (PEP201752521)	20	57	LEELQEM	889.74	825.98	63.76	909	701	208
Wild Type Peptide GVSEWDPILEELQEM, Deletion Series (PEP201752521)	18	60	LQEM	973.58	825.98	147.6	688	701	0	0	0	0
Wild Type Peptide GVSEWDPILEELQEM, Deletion Series (PEP201752521)	19	60	LQEM	631.64	825.98	0	627	701	0
Wild Type Peptide GVSEWDPILEELQEM, Deletion Series (PEP201752521)	20	60	LQEM	605.47	825.98	0	601	701	0
Wild Type Peptide GVSEWDPILEELQEM, Peptide Substitution Scan (PEP201752521)	16	19	LVSEWDPILEELQEM	3100.88	1002.33	2098.56	3042	936	2106	2129.17	158.222	0.0743118
Wild Type Peptide GVSEWDPILEELQEM, Peptide Substitution Scan (PEP201752521)	32	19	LVSEWDPILEELQEM	3723.64	1197.25	2526.39	3447.5	1081	2366.5
Wild Type Peptide GVSEWDPILEELQEM, Peptide Substitution Scan (PEP201752521)	16	43	LVSEWDPILEELQEM	2738.28	883.75	1854.53	2740	825	1915
Wild Type Peptide GVSEWDPILEELQEM, Deletion Series (PEP201752521)	18	63	M	686.33	825.98	0	475	701	0	0	0	0
Wild Type Peptide GVSEWDPILEELQEM, Deletion Series (PEP201752521)	19	63	M	738.85	825.98	0	403	701	0
Wild Type Peptide GVSEWDPILEELQEM, Deletion Series (PEP201752521)	20	63	M	635.21	825.98	0	517	701	0
Wild Type Peptide GVSEWDPILEELQEM, Peptide Substitution Scan (PEP201752521)	16	20	MVSEWDPILEELQEM	2368.6	1002.33	1366.28	2318	936	1382	1689.5	321.333	0.190194
Wild Type Peptide GVSEWDPILEELQEM, Peptide Substitution Scan (PEP201752521)	32	20	MVSEWDPILEELQEM	3113.47	1197.25	1916.22	3252.5	1081	2171.5
Wild Type Peptide GVSEWDPILEELQEM, Peptide Substitution Scan (PEP201752521)	16	44	MVSEWDPILEELQEM	2343.79	883.75	1460.05	2340	825	1515
Wild Type Peptide GVSEWDPILEELQEM, Peptide Substitution Scan (PEP201752521)	16	21	NVSEWDPILEELQEM	2543.61	1002.33	1541.28	2437.5	936	1501.5	1826.83	322.111	0.176322
Wild Type Peptide GVSEWDPILEELQEM, Peptide Substitution Scan (PEP201752521)	32	21	NVSEWDPILEELQEM	3411.8	1197.25	2214.55	3391	1081	2310
Wild Type Peptide GVSEWDPILEELQEM, Peptide Substitution Scan (PEP201752521)	16	45	NVSEWDPILEELQEM	2636.92	883.75	1753.17	2494	825	1669
Wild Type Peptide GVSEWDPILEELQEM, Peptide Substitution Scan (PEP201752521)	16	31	OVSEWDPILEELQEM	1812.3	1002.33	809.97	1763	936	827	1311.83	323.222	0.24639
Wild Type Peptide GVSEWDPILEELQEM, Peptide Substitution Scan (PEP201752521)	32	31	OVSEWDPILEELQEM	2712.11	1197.25	1514.86	2580	1081	1499
Wild Type Peptide GVSEWDPILEELQEM, Peptide Substitution Scan (PEP201752521)	16	55	OVSEWDPILEELQEM	2637.49	883.75	1753.74	2434.5	825	1609.5
Wild Type Peptide GVSEWDPILEELQEM, Deletion Series (PEP201752521)	18	55	PILEELQEM	986.08	825.98	160.1	875	701	174	180.667	30.8889	0.170972
Wild Type Peptide GVSEWDPILEELQEM, Deletion Series (PEP201752521)	19	55	PILEELQEM	952.25	825.98	126.26	928	701	227
Wild Type Peptide GVSEWDPILEELQEM, Deletion Series (PEP201752521)	20	55	PILEELQEM	835.95	825.98	9.96	842	701	141
Wild Type Peptide GVSEWDPILEELQEM, Peptide Substitution Scan (PEP201752521)	16	22	PVSEWDPILEELQEM	2205.26	1002.33	1202.94	2220	936	1284	1472.33	125.556	0.0852766
Wild Type Peptide GVSEWDPILEELQEM, Peptide Substitution Scan (PEP201752521)	32	22	PVSEWDPILEELQEM	2774.18	1197.25	1576.93	2660	1081	1579
Wild Type Peptide GVSEWDPILEELQEM, Peptide Substitution Scan (PEP201752521)	16	46	PVSEWDPILEELQEM	2464.04	883.75	1580.29	2379	825	1554
Wild Type Peptide GVSEWDPILEELQEM, Deletion Series (PEP201752521)	18	61	QEM	715.59	825.98	0	634	701	0	0	0	0
Wild Type Peptide GVSEWDPILEELQEM, Deletion Series (PEP201752521)	19	61	QEM	604.4	825.98	0	579	701	0
Wild Type Peptide GVSEWDPILEELQEM, Deletion Series (PEP201752521)	20	61	QEM	608.53	825.98	0	611	701	0
Wild Type Peptide GVSEWDPILEELQEM, Peptide Substitution Scan (PEP201752521)	16	23	QVSEWDPILEELQEM	2450.36	1002.33	1448.04	2557	936	1621	2287.83	535.444	0.23404
Wild Type Peptide GVSEWDPILEELQEM, Peptide Substitution Scan (PEP201752521)	32	23	QVSEWDPILEELQEM	3930.53	1197.25	2733.28	4172	1081	3091
Wild Type Peptide GVSEWDPILEELQEM, Peptide Substitution Scan (PEP201752521)	16	47	QVSEWDPILEELQEM	3041.66	883.75	2157.91	2976.5	825	2151.5
Wild Type Peptide GVSEWDPILEELQEM, Peptide Substitution Scan (PEP201752521)	16	24	RVSEWDPILEELQEM	2548.07	1002.33	1545.75	2438	936	1502	1778.83	184.556	0.103751
Wild Type Peptide GVSEWDPILEELQEM, Peptide Substitution Scan (PEP201752521)	32	24	RVSEWDPILEELQEM	2994.25	1197.25	1797	2960	1081	1879
Wild Type Peptide GVSEWDPILEELQEM, Peptide Substitution Scan (PEP201752521)	16	48	RVSEWDPILEELQEM	2703.78	883.75	1820.04	2780.5	825	1955.5
Wild Type Peptide GVSEWDPILEELQEM, Deletion Series (PEP201752521)	18	51	SEWDPILEELQEM	2393.31	825.98	1567.32	2282	701	1581	1483.17	119.444	0.0805334
Wild Type Peptide GVSEWDPILEELQEM, Deletion Series (PEP201752521)	19	51	SEWDPILEELQEM	2008.07	825.98	1182.09	2005	701	1304
Wild Type Peptide GVSEWDPILEELQEM, Deletion Series (PEP201752521)	20	51	SEWDPILEELQEM	2277.45	825.98	1451.47	2265.5	701	1564.5
Wild Type Peptide GVSEWDPILEELQEM, Peptide Substitution Scan (PEP201752521)	16	25	SVSEWDPILEELQEM	2325.88	1002.33	1323.55	2305	936	1369	2245.5	684.333	0.304758
Wild Type Peptide GVSEWDPILEELQEM, Peptide Substitution Scan (PEP201752521)	32	25	SVSEWDPILEELQEM	4561.07	1197.25	3363.82	4353	1081	3272
Wild Type Peptide GVSEWDPILEELQEM, Peptide Substitution Scan (PEP201752521)	16	49	SVSEWDPILEELQEM	3230.38	883.75	2346.63	2920.5	825	2095.5
Wild Type Peptide GVSEWDPILEELQEM, Peptide Substitution Scan (PEP201752521)	16	26	TVSEWDPILEELQEM	2257.82	1002.33	1255.49	2267.5	936	1331.5	2001.83	446.889	0.22324
Wild Type Peptide GVSEWDPILEELQEM, Peptide Substitution Scan (PEP201752521)	32	26	TVSEWDPILEELQEM	3586.85	1197.25	2389.6	3667	1081	2586
Wild Type Peptide GVSEWDPILEELQEM, Peptide Substitution Scan (PEP201752521)	16	50	TVSEWDPILEELQEM	3089.35	883.75	2205.6	2913	825	2088
Wild Type Peptide GVSEWDPILEELQEM, Peptide Substitution Scan (PEP201752521)	16	32	UVSEWDPILEELQEM	2259.58	1002.33	1257.26	2199	936	1263	2028.67	538.889	0.265637
Wild Type Peptide GVSEWDPILEELQEM, Peptide Substitution Scan (PEP201752521)	32	32	UVSEWDPILEELQEM	5656.11	1197.25	4458.87	3918	1081	2837
Wild Type Peptide GVSEWDPILEELQEM, Peptide Substitution Scan (PEP201752521)	16	56	UVSEWDPILEELQEM	2843.1	883.75	1959.35	2811	825	1986
Wild Type Peptide GVSEWDPILEELQEM, Deletion Series (PEP201752521)	18	50	VSEWDPILEELQEM	3372.12	825.98	2546.14	3171.5	701	2470.5	2089.5	254	0.12156
Wild Type Peptide GVSEWDPILEELQEM, Deletion Series (PEP201752521)	19	50	VSEWDPILEELQEM	2522.46	825.98	1696.48	2536	701	1835
Wild Type Peptide GVSEWDPILEELQEM, Deletion Series (PEP201752521)	20	50	VSEWDPILEELQEM	2613.8	825.98	1787.82	2664	701	1963
Wild Type Peptide GVSEWDPILEELQEM, Peptide Substitution Scan (PEP201752521)	16	27	VVSEWDPILEELQEM	2800.62	1002.33	1798.29	2855	936	1919	2249.17	220.111	0.0978634
Wild Type Peptide GVSEWDPILEELQEM, Peptide Substitution Scan (PEP201752521)	32	27	VVSEWDPILEELQEM	3362.14	1197.25	2164.9	3450	1081	2369
Wild Type Peptide GVSEWDPILEELQEM, Peptide Substitution Scan (PEP201752521)	16	51	VVSEWDPILEELQEM	3282.13	883.75	2398.38	3284.5	825	2459.5
Wild Type Peptide GVSEWDPILEELQEM, Deletion Series (PEP201752521)	18	53	WDPILEELQEM	1519.67	825.98	693.69	1549	701	848	918.333	149.778	0.163097
Wild Type Peptide GVSEWDPILEELQEM, Deletion Series (PEP201752521)	19	53	WDPILEELQEM	1494.29	825.98	668.31	1465	701	764
Wild Type Peptide GVSEWDPILEELQEM, Deletion Series (PEP201752521)	20	53	WDPILEELQEM	1892.59	825.98	1066.61	1844	701	1143
Wild Type Peptide GVSEWDPILEELQEM, Peptide Substitution Scan (PEP201752521)	16	28	WVSEWDPILEELQEM	4136.58	1002.33	3134.25	4273	936	3337	4139.83	535.222	0.129286
Wild Type Peptide GVSEWDPILEELQEM, Peptide Substitution Scan (PEP201752521)	32	28	WVSEWDPILEELQEM	5942.21	1197.25	4744.96	5856	1081	4775
Wild Type Peptide GVSEWDPILEELQEM, Peptide Substitution Scan (PEP201752521)	16	52	WVSEWDPILEELQEM	5320.39	883.75	4436.65	5132.5	825	4307.5
HA Control Peptide (PEP201752521)	1	9	YPYDVPDYAG	528.21	425.14	103.07	539	352	187	464.676	233.15	0.501747
HA Control Peptide (PEP201752521)	1	11	YPYDVPDYAG	612.16	425.14	187.02	564	352	212
HA Control Peptide (PEP201752521)	1	13	YPYDVPDYAG	649.09	425.14	223.95	590	352	238
HA Control Peptide (PEP201752521)	1	15	YPYDVPDYAG	581.55	425.14	156.41	585	352	233
HA Control Peptide (PEP201752521)	1	17	YPYDVPDYAG	635.16	425.14	210.02	582	352	230
HA Control Peptide (PEP201752521)	1	19	YPYDVPDYAG	843.27	425.14	418.13	569	352	217
HA Control Peptide (PEP201752521)	1	21	YPYDVPDYAG	615.46	425.14	190.33	596	352	244
HA Control Peptide (PEP201752521)	1	23	YPYDVPDYAG	599.68	425.14	174.54	602	352	250
HA Control Peptide (PEP201752521)	1	25	YPYDVPDYAG	544.22	425.14	119.08	518	352	166
HA Control Peptide (PEP201752521)	1	27	YPYDVPDYAG	770.48	425.14	345.34	638	352	286
HA Control Peptide (PEP201752521)	1	29	YPYDVPDYAG	709.75	425.14	284.61	704	352	352
HA Control Peptide (PEP201752521)	1	31	YPYDVPDYAG	941.03	425.14	515.89	849	352	497
HA Control Peptide (PEP201752521)	1	33	YPYDVPDYAG	1256.68	425.14	831.54	704	352	352
HA Control Peptide (PEP201752521)	1	35	YPYDVPDYAG	630.22	425.14	205.08	575	352	223
HA Control Peptide (PEP201752521)	1	37	YPYDVPDYAG	639.28	425.14	214.14	556	352	204
HA Control Peptide (PEP201752521)	1	39	YPYDVPDYAG	573.06	425.14	147.92	563	352	211
HA Control Peptide (PEP201752521)	1	41	YPYDVPDYAG	671.35	425.14	246.22	537	352	185
HA Control Peptide (PEP201752521)	1	43	YPYDVPDYAG	663.66	425.14	238.52	591	352	239
HA Control Peptide (PEP201752521)	1	45	YPYDVPDYAG	611.54	425.14	186.4	615	352	263
HA Control Peptide (PEP201752521)	1	47	YPYDVPDYAG	547.04	425.14	121.9	539	352	187
HA Control Peptide (PEP201752521)	1	49	YPYDVPDYAG	590.53	425.14	165.39	571	352	219
HA Control Peptide (PEP201752521)	1	51	YPYDVPDYAG	758.12	425.14	332.98	562	352	210
HA Control Peptide (PEP201752521)	1	53	YPYDVPDYAG	466.88	425.14	41.75	409	352	57
HA Control Peptide (PEP201752521)	1	55	YPYDVPDYAG	483.7	425.14	58.56	466	352	114
HA Control Peptide (PEP201752521)	1	57	YPYDVPDYAG	458.9	425.14	33.76	460	352	108
HA Control Peptide (PEP201752521)	1	59	YPYDVPDYAG	518.94	425.14	93.8	524.5	352	172.5
HA Control Peptide (PEP201752521)	1	61	YPYDVPDYAG	508.35	425.14	83.21	497	352	145
HA Control Peptide (PEP201752521)	1	63	YPYDVPDYAG	508	425.14	82.86	497	352	145
HA Control Peptide (PEP201752521)	33	9	YPYDVPDYAG	818.61	488.38	330.23	832	476	356
HA Control Peptide (PEP201752521)	33	11	YPYDVPDYAG	918.26	488.38	429.88	976	476	500
HA Control Peptide (PEP201752521)	33	13	YPYDVPDYAG	1031.77	488.38	543.39	1050.5	476	574.5
HA Control Peptide (PEP201752521)	33	15	YPYDVPDYAG	1089.19	488.38	600.81	1044	476	568
HA Control Peptide (PEP201752521)	33	17	YPYDVPDYAG	887.74	488.38	399.37	940	476	464
HA Control Peptide (PEP201752521)	33	19	YPYDVPDYAG	1055.42	488.38	567.05	1052	476	576
HA Control Peptide (PEP201752521)	33	21	YPYDVPDYAG	1288.89	488.38	800.51	1190	476	714
HA Control Peptide (PEP201752521)	33	23	YPYDVPDYAG	1165.19	488.38	676.82	1211	476	735
HA Control Peptide (PEP201752521)	33	25	YPYDVPDYAG	1222.19	488.38	733.82	1228	476	752
HA Control Peptide (PEP201752521)	33	27	YPYDVPDYAG	1146.11	488.38	657.73	1169	476	693
HA Control Peptide (PEP201752521)	33	29	YPYDVPDYAG	1356.89	488.38	868.51	1376	476	900
HA Control Peptide (PEP201752521)	33	31	YPYDVPDYAG	1312.64	488.38	824.26	1319	476	843
HA Control Peptide (PEP201752521)	33	33	YPYDVPDYAG	1410.31	488.38	921.93	1442	476	966
HA Control Peptide (PEP201752521)	33	35	YPYDVPDYAG	1132.94	488.38	644.57	1129	476	653
HA Control Peptide (PEP201752521)	33	37	YPYDVPDYAG	998.31	488.38	509.93	1004	476	528
HA Control Peptide (PEP201752521)	33	39	YPYDVPDYAG	1005.01	488.38	516.63	1060	476	584
HA Control Peptide (PEP201752521)	33	41	YPYDVPDYAG	1042.06	488.38	553.69	1068	476	592
HA Control Peptide (PEP201752521)	33	43	YPYDVPDYAG	1018.5	488.38	530.12	1043	476	567
HA Control Peptide (PEP201752521)	33	45	YPYDVPDYAG	1048.48	488.38	560.1	993	476	517
HA Control Peptide (PEP201752521)	33	47	YPYDVPDYAG	1050.18	488.38	561.8	1040	476	564
HA Control Peptide (PEP201752521)	33	49	YPYDVPDYAG	1170.03	488.38	681.65	1152	476	676
HA Control Peptide (PEP201752521)	33	51	YPYDVPDYAG	1068.65	488.38	580.28	1073	476	597
HA Control Peptide (PEP201752521)	33	53	YPYDVPDYAG	1141.21	488.38	652.83	1154	476	678
HA Control Peptide (PEP201752521)	33	55	YPYDVPDYAG	1064.58	488.38	576.21	1076	476	600
HA Control Peptide (PEP201752521)	33	57	YPYDVPDYAG	960.62	488.38	472.25	986	476	510
HA Control Peptide (PEP201752521)	33	59	YPYDVPDYAG	973.49	488.38	485.12	982	476	506
HA Control Peptide (PEP201752521)	33	61	YPYDVPDYAG	966.54	488.38	478.16	995	476	519
HA Control Peptide (PEP201752521)	33	63	YPYDVPDYAG	1149.67	488.38	661.3	1143	476	667
HA Control Peptide (PEP201752521)	2	9	YPYDVPDYAG	690.48	553.17	137.31	623	501	122
HA Control Peptide (PEP201752521)	4	9	YPYDVPDYAG	1225.25	553.17	672.08	785	501	284
HA Control Peptide (PEP201752521)	6	9	YPYDVPDYAG	930.36	553.17	377.19	814	501	313
HA Control Peptide (PEP201752521)	8	9	YPYDVPDYAG	1066.88	553.17	513.71	713	501	212
HA Control Peptide (PEP201752521)	10	9	YPYDVPDYAG	1024.41	553.17	471.25	797	501	296
HA Control Peptide (PEP201752521)	12	9	YPYDVPDYAG	1146.19	553.17	593.02	847	501	346
HA Control Peptide (PEP201752521)	14	9	YPYDVPDYAG	1840.14	553.17	1286.97	1401	501	900
HA Control Peptide (PEP201752521)	16	9	YPYDVPDYAG	1825.52	553.17	1272.35	1167	501	666
HA Control Peptide (PEP201752521)	18	9	YPYDVPDYAG	1305.34	553.17	752.18	932	501	431
HA Control Peptide (PEP201752521)	20	9	YPYDVPDYAG	2047.49	553.17	1494.32	1049	501	548
HA Control Peptide (PEP201752521)	22	9	YPYDVPDYAG	2156.05	553.17	1602.88	1327	501	826
HA Control Peptide (PEP201752521)	24	9	YPYDVPDYAG	1865.35	553.17	1312.18	1306	501	805
HA Control Peptide (PEP201752521)	26	9	YPYDVPDYAG	1966.72	553.17	1413.55	1354	501	853
HA Control Peptide (PEP201752521)	28	9	YPYDVPDYAG	1908.38	553.17	1355.21	1194	501	693
HA Control Peptide (PEP201752521)	30	9	YPYDVPDYAG	3252.42	553.17	2699.26	1558.5	501	1057.5
HA Control Peptide (PEP201752521)	32	9	YPYDVPDYAG	5680.07	553.17	5126.91	2160	501	1659
HA Control Peptide (PEP201752521)	2	64	YPYDVPDYAG	502.86	439.75	63.11	512	405	107
HA Control Peptide (PEP201752521)	4	64	YPYDVPDYAG	516.57	439.75	76.82	522	405	117
HA Control Peptide (PEP201752521)	6	64	YPYDVPDYAG	455.37	439.75	15.62	451	405	46
HA Control Peptide (PEP201752521)	8	64	YPYDVPDYAG	539.83	439.75	100.08	533	405	128
HA Control Peptide (PEP201752521)	10	64	YPYDVPDYAG	619.74	439.75	179.99	627	405	222
HA Control Peptide (PEP201752521)	12	64	YPYDVPDYAG	716.2	439.75	276.45	718	405	313
HA Control Peptide (PEP201752521)	14	64	YPYDVPDYAG	816.33	439.75	376.58	789	405	384
HA Control Peptide (PEP201752521)	16	64	YPYDVPDYAG	972.47	439.75	532.72	860	405	455
HA Control Peptide (PEP201752521)	18	64	YPYDVPDYAG	830.35	439.75	390.6	850	405	445
HA Control Peptide (PEP201752521)	20	64	YPYDVPDYAG	818.67	439.75	378.92	831	405	426
HA Control Peptide (PEP201752521)	22	64	YPYDVPDYAG	1085.39	439.75	645.64	1073	405	668
HA Control Peptide (PEP201752521)	24	64	YPYDVPDYAG	1123.18	439.75	683.43	1110	405	705
HA Control Peptide (PEP201752521)	26	64	YPYDVPDYAG	1364.49	439.75	924.74	1297	405	892
HA Control Peptide (PEP201752521)	28	64	YPYDVPDYAG	1137.91	439.75	698.15	1150	405	745
HA Control Peptide (PEP201752521)	30	64	YPYDVPDYAG	1251.16	439.75	811.41	1253	405	848
HA Control Peptide (PEP201752521)	32	64	YPYDVPDYAG	1218.17	439.75	778.42	1238	405	833
Wild Type Peptide GVSEWDPILEELQEM, Peptide Substitution Scan (PEP201752521)	16	29	YVSEWDPILEELQEM	2645.66	1002.33	1643.33	2540	936	1604	3144.5	1027	0.326602
Wild Type Peptide GVSEWDPILEELQEM, Peptide Substitution Scan (PEP201752521)	32	29	YVSEWDPILEELQEM	4201.07	1197.25	3003.82	4296	1081	3215
Wild Type Peptide GVSEWDPILEELQEM, Peptide Substitution Scan (PEP201752521)	16	53	YVSEWDPILEELQEM	5363.33	883.75	4479.58	5439.5	825	4614.5

## Sheet: Calculation
#Substituting peptide spots
	M	E	Q	L	E	E	L	I	P	D	W	E	S	V	G
A	GVSEWDPILEELQEA	GVSEWDPILEELQAM	GVSEWDPILEELAEM	GVSEWDPILEEAQEM	GVSEWDPILEALQEM	GVSEWDPILAELQEM	GVSEWDPIAEELQEM	GVSEWDPALEELQEM	GVSEWDAILEELQEM	GVSEWAPILEELQEM	GVSEADPILEELQEM	GVSAWDPILEELQEM	GVAEWDPILEELQEM	GASEWDPILEELQEM	AVSEWDPILEELQEM
C	GVSEWDPILEELQEC	GVSEWDPILEELQCM	GVSEWDPILEELCEM	GVSEWDPILEECQEM	GVSEWDPILECLQEM	GVSEWDPILCELQEM	GVSEWDPICEELQEM	GVSEWDPCLEELQEM	GVSEWDCILEELQEM	GVSEWCPILEELQEM	GVSECDPILEELQEM	GVSCWDPILEELQEM	GVCEWDPILEELQEM	GCSEWDPILEELQEM	CVSEWDPILEELQEM
D	GVSEWDPILEELQED	GVSEWDPILEELQDM	GVSEWDPILEELDEM	GVSEWDPILEEDQEM	GVSEWDPILEDLQEM	GVSEWDPILDELQEM	GVSEWDPIDEELQEM	GVSEWDPDLEELQEM	GVSEWDDILEELQEM	GVSEWDPILEELQEM	GVSEDDPILEELQEM	GVSDWDPILEELQEM	GVDEWDPILEELQEM	GDSEWDPILEELQEM	DVSEWDPILEELQEM
E	GVSEWDPILEELQEE	GVSEWDPILEELQEM	GVSEWDPILEELEEM	GVSEWDPILEEEQEM	GVSEWDPILEELQEM	GVSEWDPILEELQEM	GVSEWDPIEEELQEM	GVSEWDPELEELQEM	GVSEWDEILEELQEM	GVSEWEPILEELQEM	GVSEEDPILEELQEM	GVSEWDPILEELQEM	GVEEWDPILEELQEM	GESEWDPILEELQEM	EVSEWDPILEELQEM
F	GVSEWDPILEELQEF	GVSEWDPILEELQFM	GVSEWDPILEELFEM	GVSEWDPILEEFQEM	GVSEWDPILEFLQEM	GVSEWDPILFELQEM	GVSEWDPIFEELQEM	GVSEWDPFLEELQEM	GVSEWDFILEELQEM	GVSEWFPILEELQEM	GVSEFDPILEELQEM	GVSFWDPILEELQEM	GVFEWDPILEELQEM	GFSEWDPILEELQEM	FVSEWDPILEELQEM
G	GVSEWDPILEELQEG	GVSEWDPILEELQGM	GVSEWDPILEELGEM	GVSEWDPILEEGQEM	GVSEWDPILEGLQEM	GVSEWDPILGELQEM	GVSEWDPIGEELQEM	GVSEWDPGLEELQEM	GVSEWDGILEELQEM	GVSEWGPILEELQEM	GVSEGDPILEELQEM	GVSGWDPILEELQEM	GVGEWDPILEELQEM	GGSEWDPILEELQEM	GVSEWDPILEELQEM
H	GVSEWDPILEELQEH	GVSEWDPILEELQHM	GVSEWDPILEELHEM	GVSEWDPILEEHQEM	GVSEWDPILEHLQEM	GVSEWDPILHELQEM	GVSEWDPIHEELQEM	GVSEWDPHLEELQEM	GVSEWDHILEELQEM	GVSEWHPILEELQEM	GVSEHDPILEELQEM	GVSHWDPILEELQEM	GVHEWDPILEELQEM	GHSEWDPILEELQEM	HVSEWDPILEELQEM
I	GVSEWDPILEELQEI	GVSEWDPILEELQIM	GVSEWDPILEELIEM	GVSEWDPILEEIQEM	GVSEWDPILEILQEM	GVSEWDPILIELQEM	GVSEWDPIIEELQEM	GVSEWDPILEELQEM	GVSEWDIILEELQEM	GVSEWIPILEELQEM	GVSEIDPILEELQEM	GVSIWDPILEELQEM	GVIEWDPILEELQEM	GISEWDPILEELQEM	IVSEWDPILEELQEM
K	GVSEWDPILEELQEK	GVSEWDPILEELQKM	GVSEWDPILEELKEM	GVSEWDPILEEKQEM	GVSEWDPILEKLQEM	GVSEWDPILKELQEM	GVSEWDPIKEELQEM	GVSEWDPKLEELQEM	GVSEWDKILEELQEM	GVSEWKPILEELQEM	GVSEKDPILEELQEM	GVSKWDPILEELQEM	GVKEWDPILEELQEM	GKSEWDPILEELQEM	KVSEWDPILEELQEM
L	GVSEWDPILEELQEL	GVSEWDPILEELQLM	GVSEWDPILEELLEM	GVSEWDPILEELQEM	GVSEWDPILELLQEM	GVSEWDPILLELQEM	GVSEWDPILEELQEM	GVSEWDPLLEELQEM	GVSEWDLILEELQEM	GVSEWLPILEELQEM	GVSELDPILEELQEM	GVSLWDPILEELQEM	GVLEWDPILEELQEM	GLSEWDPILEELQEM	LVSEWDPILEELQEM
M	GVSEWDPILEELQEM	GVSEWDPILEELQMM	GVSEWDPILEELMEM	GVSEWDPILEEMQEM	GVSEWDPILEMLQEM	GVSEWDPILMELQEM	GVSEWDPIMEELQEM	GVSEWDPMLEELQEM	GVSEWDMILEELQEM	GVSEWMPILEELQEM	GVSEMDPILEELQEM	GVSMWDPILEELQEM	GVMEWDPILEELQEM	GMSEWDPILEELQEM	MVSEWDPILEELQEM
N	GVSEWDPILEELQEN	GVSEWDPILEELQNM	GVSEWDPILEELNEM	GVSEWDPILEENQEM	GVSEWDPILENLQEM	GVSEWDPILNELQEM	GVSEWDPINEELQEM	GVSEWDPNLEELQEM	GVSEWDNILEELQEM	GVSEWNPILEELQEM	GVSENDPILEELQEM	GVSNWDPILEELQEM	GVNEWDPILEELQEM	GNSEWDPILEELQEM	NVSEWDPILEELQEM
P	GVSEWDPILEELQEP	GVSEWDPILEELQPM	GVSEWDPILEELPEM	GVSEWDPILEEPQEM	GVSEWDPILEPLQEM	GVSEWDPILPELQEM	GVSEWDPIPEELQEM	GVSEWDPPLEELQEM	GVSEWDPILEELQEM	GVSEWPPILEELQEM	GVSEPDPILEELQEM	GVSPWDPILEELQEM	GVPEWDPILEELQEM	GPSEWDPILEELQEM	PVSEWDPILEELQEM
Q	GVSEWDPILEELQEQ	GVSEWDPILEELQQM	GVSEWDPILEELQEM	GVSEWDPILEEQQEM	GVSEWDPILEQLQEM	GVSEWDPILQELQEM	GVSEWDPIQEELQEM	GVSEWDPQLEELQEM	GVSEWDQILEELQEM	GVSEWQPILEELQEM	GVSEQDPILEELQEM	GVSQWDPILEELQEM	GVQEWDPILEELQEM	GQSEWDPILEELQEM	QVSEWDPILEELQEM
R	GVSEWDPILEELQER	GVSEWDPILEELQRM	GVSEWDPILEELREM	GVSEWDPILEERQEM	GVSEWDPILERLQEM	GVSEWDPILRELQEM	GVSEWDPIREELQEM	GVSEWDPRLEELQEM	GVSEWDRILEELQEM	GVSEWRPILEELQEM	GVSERDPILEELQEM	GVSRWDPILEELQEM	GVREWDPILEELQEM	GRSEWDPILEELQEM	RVSEWDPILEELQEM
S	GVSEWDPILEELQES	GVSEWDPILEELQSM	GVSEWDPILEELSEM	GVSEWDPILEESQEM	GVSEWDPILESLQEM	GVSEWDPILSELQEM	GVSEWDPISEELQEM	GVSEWDPSLEELQEM	GVSEWDSILEELQEM	GVSEWSPILEELQEM	GVSESDPILEELQEM	GVSSWDPILEELQEM	GVSEWDPILEELQEM	GSSEWDPILEELQEM	SVSEWDPILEELQEM
T	GVSEWDPILEELQET	GVSEWDPILEELQTM	GVSEWDPILEELTEM	GVSEWDPILEETQEM	GVSEWDPILETLQEM	GVSEWDPILTELQEM	GVSEWDPITEELQEM	GVSEWDPTLEELQEM	GVSEWDTILEELQEM	GVSEWTPILEELQEM	GVSETDPILEELQEM	GVSTWDPILEELQEM	GVTEWDPILEELQEM	GTSEWDPILEELQEM	TVSEWDPILEELQEM
V	GVSEWDPILEELQEV	GVSEWDPILEELQVM	GVSEWDPILEELVEM	GVSEWDPILEEVQEM	GVSEWDPILEVLQEM	GVSEWDPILVELQEM	GVSEWDPIVEELQEM	GVSEWDPVLEELQEM	GVSEWDVILEELQEM	GVSEWVPILEELQEM	GVSEVDPILEELQEM	GVSVWDPILEELQEM	GVVEWDPILEELQEM	GVSEWDPILEELQEM	VVSEWDPILEELQEM
W	GVSEWDPILEELQEW	GVSEWDPILEELQWM	GVSEWDPILEELWEM	GVSEWDPILEEWQEM	GVSEWDPILEWLQEM	GVSEWDPILWELQEM	GVSEWDPIWEELQEM	GVSEWDPWLEELQEM	GVSEWDWILEELQEM	GVSEWWPILEELQEM	GVSEWDPILEELQEM	GVSWWDPILEELQEM	GVWEWDPILEELQEM	GWSEWDPILEELQEM	WVSEWDPILEELQEM
Y	GVSEWDPILEELQEY	GVSEWDPILEELQYM	GVSEWDPILEELYEM	GVSEWDPILEEYQEM	GVSEWDPILEYLQEM	GVSEWDPILYELQEM	GVSEWDPIYEELQEM	GVSEWDPYLEELQEM	GVSEWDYILEELQEM	GVSEWYPILEELQEM	GVSEYDPILEELQEM	GVSYWDPILEELQEM	GVYEWDPILEELQEM	GYSEWDPILEELQEM	YVSEWDPILEELQEM
Z	GVSEWDPILEELQEZ	GVSEWDPILEELQZM	GVSEWDPILEELZEM	GVSEWDPILEEZQEM	GVSEWDPILEZLQEM	GVSEWDPILZELQEM	GVSEWDPIZEELQEM	GVSEWDPZLEELQEM	GVSEWDZILEELQEM	GVSEWZPILEELQEM	GVSEZDPILEELQEM	GVSZWDPILEELQEM	GVZEWDPILEELQEM	GZSEWDPILEELQEM	ZVSEWDPILEELQEM
O	GVSEWDPILEELQEO	GVSEWDPILEELQOM	GVSEWDPILEELOEM	GVSEWDPILEEOQEM	GVSEWDPILEOLQEM	GVSEWDPILOELQEM	GVSEWDPIOEELQEM	GVSEWDPOLEELQEM	GVSEWDOILEELQEM	GVSEWOPILEELQEM	GVSEODPILEELQEM	GVSOWDPILEELQEM	GVOEWDPILEELQEM	GOSEWDPILEELQEM	OVSEWDPILEELQEM
U	GVSEWDPILEELQEU	GVSEWDPILEELQUM	GVSEWDPILEELUEM	GVSEWDPILEEUQEM	GVSEWDPILEULQEM	GVSEWDPILUELQEM	GVSEWDPIUEELQEM	GVSEWDPULEELQEM	GVSEWDUILEELQEM	GVSEWUPILEELQEM	GVSEUDPILEELQEM	GVSUWDPILEELQEM	GVUEWDPILEELQEM	GUSEWDPILEELQEM	UVSEWDPILEELQEM
#Intensity of substituting peptide spots
	M	E	Q	L	E	E	L	I	P	D	W	E	S	V	G
A	1021.67	132.167	778.333	553.167	115	183	523.333	418.333	1760.33	0	0	243.333	1398	1376.5	1666.83
C	2795.33	646.333	3567.83	2317.17	801.167	1211.33	2373.83	2343.83	6426.17	653.333	469.667	904.667	3236	3269.83	5779.17
D	2930	1247.33	3956.67	2129.5	1633.67	1533.67	2295	2872	8508.67	1347.5	96.3333	1852.5	4296.67	3282	3451.67
E	3245	1347.5	4504.67	2443.83	1347.5	1347.5	2560.5	1927.67	7848.83	1534	161	1347.5	4148.5	2750.33	2821.33
F	5557.67	895.5	7625.33	5127.83	1233	1788.33	3759.17	3623	24305.7	253	357.5	294.333	2110.67	2249	2315
G	272.333	61	1203.67	409.333	185	183	324.833	303.667	622.333	37.6667	0	415	1429.33	1530.5	1347.5
H	1471.17	257.333	1734.33	665	144	294.5	440.667	401.333	1738.67	9	0	230	1113	1177.83	1591.83
I	2835	598.667	3486	1038.17	640	3480.83	1520.33	1347.5	10150.5	296.833	0	324	1894	1881.5	2158.67
K	233.667	13.1667	477.167	259.333	74	71	249.667	262	888.5	0	0	159.667	791.333	884.333	1405.67
L	1890.67	218.667	2345.33	1347.5	459.667	1135.33	1347.5	1604.33	11008.3	107	27	195	1508.33	1849.5	2129.17
M	1347.5	169	1129.17	779	181	171.333	406	378	1768.67	62.3333	2	197	1023.83	1154.33	1689.5
N	992.333	229.667	1501.33	819.833	189	251.5	685	469	1436.33	8.66667	0	245	1352.17	1544.17	1826.83
P	856	275.667	1447.67	1212.17	375.333	401.833	473.667	272.833	1347.5	25	0	250.833	977.667	1326.67	1472.33
Q	707.5	95.6667	1347.5	649.333	156.667	127.667	539	469	1539.67	47	0	262.5	1534.83	1541.17	2287.83
R	1052	3.33333	1027.83	624.833	132	75.6667	366.333	244.333	810.667	0	0	181.333	1326.5	1691.33	1778.83
S	1163.83	129.5	1516	964.5	318.667	208	588.333	394.167	1530.33	26.1667	7.33333	291	1347.5	1528.83	2245.5
T	1106	291.667	2147.5	1056.5	276.5	350.5	595.667	441.667	1486.17	90	6.66667	223.667	1333.67	1404.5	2001.83
V	1855.33	398.167	2321	899	337.167	3509.17	1051	850.5	6974.17	370.667	7	282.333	1544.33	1347.5	2249.17
W	2432.67	410.5	3951.5	2038.33	498.667	827.833	4002.5	2864.83	9520	39	1347.5	356.5	3385	3032	4139.83
Y	5645.83	1315.33	6888.33	3670.17	1189.33	1167.17	2421.5	2338.67	17372.3	343	411	286.667	1998.67	2284.67	3144.5
Z	526	8.33333	981.667	667.333	193.833	153.333	236.167	182	1302.33	0	0	170.667	1274.17	1309.33	2066.17
O	603.833	171.333	1388.67	770.333	372	386.167	134.333	47.6667	1942.67	0	0	138	1088.33	1060.83	1311.83
U	1038.5	5	972.833	152	262.667	91.6667	637.833	215.333	556	0	6.33333	187.667	1322	1113.17	2028.67
Mean	1807.82	387.862	2447.84	1330.18	483.297	823.928	1197.05	1055.29	5254.12	228.268	126.058	393.007	1801.5	1764.78	2300.42
Maximum	5645.83	1347.5	7625.33	5127.83	1633.67	3509.17	4002.5	3623	24305.7	1534	1347.5	1852.5	4296.67	3282	5779.17
Native Epitope	1347.5	1347.5	1347.5	1347.5	1347.5	1347.5	1347.5	1347.5	1347.5	1347.5	1347.5	1347.5	1347.5	1347.5	1347.5
Max. AA	Y	E	F	F	D	V	W	F	F	E	W	D	D	D	C
Max/Mean	3.12301	3.47417	3.11513	3.85499	3.38025	4.25907	3.34363	3.43318	4.62602	6.72017	10.6895	4.71365	2.38505	1.85973	2.51222
Max/Native	4.18986	1	5.65887	3.80544	1.21237	2.60421	2.97032	2.68868	18.0376	1.1384	1	1.37477	3.18862	2.43562	4.28881
	M	E	Q	L	E	E	L	I	P	D	W	E	S	V	G				M	E	Q	L	E	E	L	I	P	D	W	E	S	V	G
A	0.565138	0.340757	0.317967	0.415858	0.237949	0.222107	0.437186	0.396416	0.335038	-1e-08	-1e-08	0.619157	0.77602	0.779986	0.724578			A	0.758194	0.0980829	0.577613	0.410513	0.0853432	0.135807	0.388374	0.310451	1.30637	-1e-08	-1e-08	0.180581	1.03748	1.02152	1.23698
C	1.54625	1.6664	1.45754	1.74199	1.65771	1.47019	1.98307	2.22103	1.22307	2.86213	3.7258	2.30191	1.79628	1.85283	2.51222			C	2.07446	0.479654	2.64774	1.7196	0.594558	0.898949	1.76166	1.73939	4.76895	0.484848	0.348547	0.671367	2.40148	2.42659	4.28881
D	1.62074	3.21592	1.61639	1.60091	3.38025	1.86141	1.91721	2.72153	1.61943	5.90315	0.764199	4.71365	2.38505	1.85973	1.50045			D	2.1744	0.925665	2.9363	1.58033	1.21237	1.13816	1.70315	2.13135	6.31441	1	0.0714904	1.37477	3.18862	2.43562	2.56153
E	1.79498	3.47417	1.84026	1.83722	2.78814	1.63546	2.13901	1.82667	1.49384	6.72017	1.27719	3.42869	2.3028	1.55846	1.22644			E	2.40816	1	3.34298	1.81361	1	1	1.90019	1.43055	5.82474	1.1384	0.119481	1	3.07866	2.04106	2.09375
F	3.07424	2.30881	3.11513	3.85499	2.55123	2.1705	3.14036	3.43318	4.62602	1.10835	2.836	0.748926	1.17162	1.27438	1.00634			F	4.12443	0.664564	5.65887	3.80544	0.915028	1.32715	2.78973	2.68868	18.0376	0.187755	0.265306	0.218429	1.56636	1.66902	1.718
G	0.150642	0.157272	0.491726	0.307727	0.382787	0.222107	0.271361	0.287757	0.118447	0.165011	-6e-08	1.05596	0.793413	0.867249	0.585762			G	0.202103	0.045269	0.893259	0.303772	0.137291	0.135807	0.241064	0.225356	0.461843	0.027953	-1e-08	0.307978	1.06073	1.13581	1
H	0.81378	0.663466	0.708516	0.499932	0.297953	0.357434	0.368127	0.380306	0.330915	0.0394272	-7e-08	0.585231	0.617818	0.667413	0.691975			H	1.09177	0.190971	1.28707	0.493506	0.106865	0.218553	0.327025	0.297835	1.29029	0.00667903	-1e-08	0.170686	0.825974	0.874088	1.18132
I	1.56819	1.5435	1.42411	0.78047	1.32424	4.22468	1.27007	1.2769	1.93191	1.30037	-8e-08	0.824412	1.05135	1.06614	0.938379			I	2.1039	0.44428	2.58701	0.770439	0.474954	2.58318	1.12826	1	7.53284	0.220284	-1e-08	0.240445	1.40557	1.39629	1.60198
K	0.129253	0.0339467	0.194934	0.194961	0.153115	0.0861725	0.208568	0.248273	0.169105	-9e-08	-9e-08	0.406269	0.439263	0.501102	0.611048			K	0.173408	0.00977117	0.354113	0.192455	0.0549165	0.0526902	0.185281	0.194434	0.659369	-1e-08	-1e-08	0.118491	0.58726	0.656277	1.04317
L	1.04583	0.563774	0.958123	1.01302	0.951106	1.37795	1.12568	1.52028	2.09518	0.468747	0.214187	0.496174	0.837265	1.04801	0.925555			L	1.40309	0.162276	1.74051	1	0.341126	0.842548	1	1.1906	8.16945	0.0794063	0.0200371	0.144712	1.11936	1.37254	1.58009
M	0.745373	0.435722	0.461291	0.585634	0.374511	0.207947	0.339167	0.358195	0.336624	0.273071	0.0158656	0.501263	0.568323	0.654096	0.734431			M	1	0.125417	0.837972	0.578108	0.134323	0.127149	0.301299	0.280519	1.31255	0.0462585	0.00148422	0.146197	0.759802	0.856648	1.2538
N	0.548912	0.592135	0.61333	0.616332	0.391064	0.305245	0.57224	0.444428	0.273373	0.0379671	1e-08	0.623398	0.750578	0.874993	0.79413			N	0.736425	0.170439	1.11416	0.608411	0.14026	0.186642	0.508349	0.348052	1.06592	0.00643165	-1e-08	0.181818	1.00346	1.14595	1.35572
P	0.473499	0.710733	0.591406	0.911279	0.77661	0.487705	0.395695	0.258539	0.256465	0.10952	2e-08	0.638241	0.542696	0.751748	0.640028			P	0.63525	0.204576	1.07434	0.899567	0.27854	0.298207	0.351515	0.202474	1	0.0185529	-1e-08	0.186147	0.725541	0.984539	1.09264
Q	0.391356	0.246651	0.550485	0.488154	0.324162	0.154949	0.450273	0.444428	0.29304	0.205898	3e-08	0.667927	0.851975	0.873293	0.994528			Q	0.525046	0.0709957	1	0.48188	0.116265	0.0947433	0.4	0.348052	1.14261	0.0348794	-1e-08	0.194805	1.13902	1.14372	1.69784
R	0.581917	0.00859415	0.419894	0.469736	0.273124	0.0918366	0.30603	0.231532	0.154292	4e-08	4e-08	0.4614	0.736331	0.958385	0.773265			R	0.780705	0.00247371	0.762771	0.463698	0.0979592	0.0561534	0.271861	0.181323	0.601608	-1e-08	-1e-08	0.13457	0.984416	1.25516	1.3201
S	0.643778	0.333881	0.619321	0.725089	0.65936	0.252449	0.491486	0.373515	0.291263	0.114631	0.0581743	0.740444	0.747988	0.866305	0.976126			S	0.863698	0.0961039	1.12505	0.71577	0.236487	0.15436	0.436611	0.292517	1.13568	0.0194187	0.00544217	0.215955	1	1.13457	1.66642
T	0.611787	0.751985	0.877304	0.794253	0.572112	0.425402	0.497612	0.418526	0.282857	0.394273	0.0528858	0.569116	0.740309	0.795852	0.870203			T	0.820779	0.21645	1.59369	0.784045	0.205195	0.260111	0.442053	0.327767	1.10291	0.0667903	0.00494742	0.165986	0.989734	1.0423	1.48559
V	1.02628	1.02657	0.948183	0.675848	0.697639	4.25907	0.877991	0.80594	1.32737	1.62382	0.0555301	0.718392	0.857249	0.763553	0.97772			V	1.37687	0.295485	1.72245	0.667161	0.250216	2.60421	0.779963	0.631169	5.17563	0.275077	0.0051948	0.209524	1.14607	1	1.66914
W	1.34564	1.05837	1.61428	1.53237	1.0318	1.00474	3.34363	2.71474	1.81191	0.170852	10.6895	0.907108	1.87899	1.71807	1.7996			W	1.80532	0.304638	2.93247	1.51268	0.370068	0.614348	2.97032	2.12604	7.06494	0.0289425	1	0.264564	2.51206	2.25009	3.07223
Y	3.12301	3.39124	2.81405	2.75915	2.46087	1.41659	2.02289	2.21614	3.30642	1.50262	3.2604	0.729418	1.10945	1.29459	1.36692			Y	4.18986	0.976129	5.11194	2.72369	0.882622	0.866172	1.79703	1.73556	12.8923	0.254545	0.305009	0.21274	1.48324	1.69549	2.33358
Z	0.290958	0.0214854	0.401034	0.501686	0.401065	0.186101	0.197291	0.172465	0.247869	1e-07	1e-07	0.434258	0.707281	0.741926	0.898169			Z	0.390352	0.00618428	0.72851	0.495238	0.143847	0.113791	0.175263	0.135065	0.966481	-1e-08	-1e-08	0.126654	0.945578	0.971676	1.53333
O	0.334012	0.441738	0.567303	0.579119	0.769713	0.46869	0.11222	0.0451694	0.369741	1.1e-07	1.1e-07	0.351139	0.604126	0.601115	0.570258			O	0.448114	0.127149	1.03055	0.571676	0.276067	0.28658	0.0996908	0.0353741	1.44168	-1e-08	-1e-08	0.102412	0.807669	0.78726	0.973531
U	0.574449	0.0128913	0.397425	0.11427	0.543489	0.111256	0.532837	0.204051	0.105822	1.12e-07	0.0502415	0.477515	0.733833	0.63077	0.881868			U	0.770686	0.00371057	0.721954	0.112801	0.194929	0.0680272	0.473346	0.159802	0.412616	-1e-08	0.00470005	0.13927	0.981076	0.826098	1.5055
	M	E	Q	L	E	E	L	I	P	D	W	E	S	V	G				M	E	Q	L	E	E	L	I	P	D	W	E	S	V	G
	3.12301	3.47417	3.11513	3.85499	3.38025	4.25907	3.34363	3.43318	4.62602	6.72017	10.6895	4.71365	2.38505	1.85973	2.51222			A	0.758194	0.0980829	0.577613	0.410513	0.0853432	0.135807	0.388374	0.310451	1.30637	-1e-08	-1e-08	0.180581	1.03748	1.02152	1.23698
	3.07424	3.39124	2.81405	2.75915	2.78814	4.22468	3.14036	2.72153	3.30642	5.90315	3.7258	3.42869	2.3028	1.85283	1.7996			C	2.07446	0.479654	2.64774	1.7196	0.594558	0.898949	1.76166	1.73939	4.76895	0.484848	0.348547	0.671367	2.40148	2.42659	4.28881
	1.79498	3.21592	1.84026	1.83722	2.55123	2.1705	2.13901	2.71474	2.09518	2.86213	3.2604	2.30191	1.87899	1.71807	1.50045			D	2.1744	0.925665	2.9363	1.58033	1.21237	1.13816	1.70315	2.13135	6.31441	1	0.0714904	1.37477	3.18862	2.43562	2.56153
	1.62074	2.30881	1.61639	1.74199	2.46087	1.86141	2.02289	2.22103	1.93191	1.62382	2.836	1.05596	1.79628	1.55846	1.36692			E	2.40816	1	3.34298	1.81361	1	1	1.90019	1.43055	5.82474	1.1384	0.119481	1	3.07866	2.04106	2.09375
	1.56819	1.6664	1.61428	1.60091	1.65771	1.63546	1.98307	2.21614	1.81191	1.50262	1.27719	0.907108	1.17162	1.29459	1.22644			F	4.12443	0.664564	5.65887	3.80544	0.915028	1.32715	2.78973	2.68868	18.0376	0.187755	0.265306	0.218429	1.56636	1.66902	1.718
	1.54625	1.5435	1.45754	1.53237	1.32424	1.47019	1.91721	1.82667	1.61943	1.30037	0.764199	0.824412	1.10945	1.27438	1.00634			G	0.202103	0.045269	0.893259	0.303772	0.137291	0.135807	0.241064	0.225356	0.461843	0.027953	-1e-08	0.307978	1.06073	1.13581	1
	1.34564	1.05837	1.42411	1.01302	1.0318	1.41659	1.27007	1.52028	1.49384	1.10835	0.214187	0.748926	1.05135	1.06614	0.994528			H	1.09177	0.190971	1.28707	0.493506	0.106865	0.218553	0.327025	0.297835	1.29029	0.00667903	-1e-08	0.170686	0.825974	0.874088	1.18132
	1.04583	1.02657	0.958123	0.911279	0.951106	1.37795	1.12568	1.2769	1.32737	0.468747	0.0581743	0.740444	0.857249	1.04801	0.97772			I	2.1039	0.44428	2.58701	0.770439	0.474954	2.58318	1.12826	1	7.53284	0.220284	-1e-08	0.240445	1.40557	1.39629	1.60198
	1.02628	0.751985	0.948183	0.794253	0.77661	1.00474	0.877991	0.80594	1.22307	0.394273	0.0555301	0.729418	0.851975	0.958385	0.976126			K	0.173408	0.00977117	0.354113	0.192455	0.0549165	0.0526902	0.185281	0.194434	0.659369	-1e-08	-1e-08	0.118491	0.58726	0.656277	1.04317
	0.81378	0.710733	0.877304	0.78047	0.769713	0.487705	0.57224	0.444428	0.369741	0.273071	0.0528858	0.718392	0.837265	0.874993	0.938379			L	1.40309	0.162276	1.74051	1	0.341126	0.842548	1	1.1906	8.16945	0.0794063	0.0200371	0.144712	1.11936	1.37254	1.58009
	0.745373	0.663466	0.708516	0.725089	0.697639	0.46869	0.532837	0.444428	0.336624	0.205898	0.0502415	0.667927	0.793413	0.873293	0.925555			M	1	0.125417	0.837972	0.578108	0.134323	0.127149	0.301299	0.280519	1.31255	0.0462585	0.00148422	0.146197	0.759802	0.856648	1.2538
	0.643778	0.592135	0.619321	0.675848	0.65936	0.425402	0.497612	0.418526	0.335038	0.170852	0.0158656	0.638241	0.77602	0.867249	0.898169			N	0.736425	0.170439	1.11416	0.608411	0.14026	0.186642	0.508349	0.348052	1.06592	0.00643165	-1e-08	0.181818	1.00346	1.14595	1.35572
	0.611787	0.563774	0.61333	0.616332	0.572112	0.357434	0.491486	0.396416	0.330915	0.165011	1.1e-07	0.623398	0.750578	0.866305	0.881868			P	0.63525	0.204576	1.07434	0.899567	0.27854	0.298207	0.351515	0.202474	1	0.0185529	-1e-08	0.186147	0.725541	0.984539	1.09264
	0.581917	0.441738	0.591406	0.585634	0.543489	0.305245	0.450273	0.380306	0.29304	0.114631	1e-07	0.619157	0.747988	0.795852	0.870203			Q	0.525046	0.0709957	1	0.48188	0.116265	0.0947433	0.4	0.348052	1.14261	0.0348794	-1e-08	0.194805	1.13902	1.14372	1.69784
	0.574449	0.435722	0.567303	0.579119	0.401065	0.252449	0.437186	0.373515	0.291263	0.10952	4e-08	0.585231	0.740309	0.779986	0.79413			R	0.780705	0.00247371	0.762771	0.463698	0.0979592	0.0561534	0.271861	0.181323	0.601608	-1e-08	-1e-08	0.13457	0.984416	1.25516	1.3201
	0.565138	0.340757	0.550485	0.501686	0.391064	0.222107	0.395695	0.358195	0.282857	0.0394272	3e-08	0.569116	0.736331	0.763553	0.773265			S	0.863698	0.0961039	1.12505	0.71577	0.236487	0.15436	0.436611	0.292517	1.13568	0.0194187	0.00544217	0.215955	1	1.13457	1.66642
	0.548912	0.333881	0.491726	0.499932	0.382787	0.222107	0.368127	0.287757	0.273373	0.0379671	2e-08	0.501263	0.733833	0.751748	0.734431			T	0.820779	0.21645	1.59369	0.784045	0.205195	0.260111	0.442053	0.327767	1.10291	0.0667903	0.00494742	0.165986	0.989734	1.0423	1.48559
	0.473499	0.246651	0.461291	0.488154	0.374511	0.207947	0.339167	0.258539	0.256465	1.12e-07	1e-08	0.496174	0.707281	0.741926	0.724578			V	1.37687	0.295485	1.72245	0.667161	0.250216	2.60421	0.779963	0.631169	5.17563	0.275077	0.0051948	0.209524	1.14607	1	1.66914
	0.391356	0.157272	0.419894	0.469736	0.324162	0.186101	0.30603	0.248273	0.247869	1.1e-07	-1e-08	0.477515	0.617818	0.667413	0.691975			W	1.80532	0.304638	2.93247	1.51268	0.370068	0.614348	2.97032	2.12604	7.06494	0.0289425	1	0.264564	2.51206	2.25009	3.07223
	0.334012	0.0339467	0.401034	0.415858	0.297953	0.154949	0.271361	0.231532	0.169105	1e-07	-6e-08	0.4614	0.604126	0.654096	0.640028			Y	4.18986	0.976129	5.11194	2.72369	0.882622	0.866172	1.79703	1.73556	12.8923	0.254545	0.305009	0.21274	1.48324	1.69549	2.33358
	0.290958	0.0214854	0.397425	0.307727	0.273124	0.111256	0.208568	0.204051	0.154292	4e-08	-7e-08	0.434258	0.568323	0.63077	0.611048			Z	0.390352	0.00618428	0.72851	0.495238	0.143847	0.113791	0.175263	0.135065	0.966481	-1e-08	-1e-08	0.126654	0.945578	0.971676	1.53333
	0.150642	0.0128913	0.317967	0.194961	0.237949	0.0918366	0.197291	0.172465	0.118447	-1e-08	-8e-08	0.406269	0.542696	0.601115	0.585762			O	0.448114	0.127149	1.03055	0.571676	0.276067	0.28658	0.0996908	0.0353741	1.44168	-1e-08	-1e-08	0.102412	0.807669	0.78726	0.973531
	0.129253	0.00859415	0.194934	0.11427	0.153115	0.0861725	0.11222	0.0451694	0.105822	-9e-08	-9e-08	0.351139	0.439263	0.501102	0.570258			U	0.770686	0.00371057	0.721954	0.112801	0.194929	0.0680272	0.473346	0.159802	0.412616	-1e-08	0.00470005	0.13927	0.981076	0.826098	1.5055
	M	E	Q	L	E	E	L	I	P	D	W	E	S	V	G
	Y	E	F	F	D	V	W	F	F	E	W	D	D	D	C
	F	Y	Y	Y	E	I	F	D	Y	D	C	E	E	C	W
	E	D	E	E	F	F	E	W	L	C	Y	C	W	W	D
	D	F	D	C	Y	D	Y	C	I	V	F	G	C	E	Y
	I	C	W	D	C	E	C	Y	W	Y	E	W	F	Y	E
	C	I	C	W	I	C	D	E	D	I	D	I	Y	F	F
	W	W	I	L	W	Y	I	L	E	F	L	F	I	I	Q
	L	V	L	P	L	L	L	I	V	L	S	S	V	L	V
	V	T	V	T	P	W	V	V	C	T	V	Y	Q	R	S
	H	P	T	I	O	P	N	Q	O	M	T	V	L	N	I
	M	H	H	S	V	O	U	N	M	Q	U	Q	G	Q	L
	S	N	S	V	S	T	T	T	A	W	M	P	A	G	Z
	T	L	N	N	T	H	S	A	H	G	O	N	N	S	U
	R	O	P	M	U	N	Q	H	Q	S	Z	A	S	T	T
	U	M	O	O	Z	S	A	S	S	P	R	H	T	A	N
	A	A	Q	Z	N	A	P	M	T	H	Q	T	R	V	R
	N	S	G	H	G	G	H	G	N	N	P	M	U	P	M
	P	Q	M	Q	M	M	M	P	P	U	N	L	Z	Z	A
	Q	G	R	R	Q	Z	R	K	Z	O	A	U	H	H	H
	O	K	Z	A	H	Q	G	R	K	Z	G	R	O	M	P
	Z	Z	U	G	R	U	K	U	R	R	H	Z	M	U	K
	G	U	A	K	A	R	Z	Z	G	A	I	K	P	O	G
	K	R	K	U	K	K	O	O	U	K	K	O	K	K	O
