# Supplementary material for: A cross-kingdom conserved ER-phagy receptor maintains endoplasmic reticulum homeostasis during stress
Source: eLife. 2020 Aug 27;9:e58396. doi: 10.7554/eLife.58396 (PMC7515635; doi:10.7554/eLife.58396)
Supplement: Supplementary file 4. [file elife-58396-supp4.xlsx]

## Sheet: biological process
	Table S4. Enriched GO categorization of quantitative proteomics analyses of AtC53 mediated degradation (TMT). Work sheets below contain GO analysis of biological processes, cellular component and molecular function.
	All hereby created MS/MS spectra were searched using MSAmanda v2.0.0.14114 (Dorfer V. et al., J. Proteome Res. 2014 Aug 1;13(8):3679-84).
	The RAW-files were searched against the created sub-database called TAIR10_pep_20101214_changeSymbol.fasta (32,785 sequences; 14,482,855 residues).
Category	Term	Count	%	PValue	Genes	List Total	Pop Hits	Pop Total	Fold Enrichment	Bonferroni	Benjamini	FDR
GOTERM_BP_DIRECT	GO:0055114~oxidation-reduction process	86	19.59	1.92019e-24	AT5G19890, AT5G64100, AT4G21850, AT5G17820, AT4G15393, AT1G32300, AT1G12520, AT1G48130, AT5G22500, AT3G43670, AT2G34500, AT1G30700, AT5G05600, AT1G09940, AT1G77120, AT5G48000, AT1G09090, AT1G49570, AT2G33380, AT2G28190, AT1G22440, AT1G43800, AT2G22330, AT3G09940, AT5G42580, AT1G34540, AT2G37130, AT1G05240, AT1G62570, AT4G39480, AT2G25160, AT4G39950, AT1G55290, AT3G32980, AT1G16400, AT1G30870, AT5…	348	1330	18499	3.43729	8.19922e-22	8.19922e-22	2.70374e-21
GOTERM_BP_DIRECT	GO:0042744~hydrogen peroxide catabolic process	20	4.55581	3.2789e-15	AT5G19890, AT5G64100, AT3G49960, AT2G39040, AT2G37130, AT1G05240, AT5G17820, AT4G30170, AT4G08770, AT5G67400, AT4G08780, AT1G34510, AT3G32980, AT2G38380, AT1G30870, AT3G49120, AT5G24070, AT4G26010, AT1G14540, AT1G49570	348	89	18499	11.9456	1.4222e-12	7.11098e-13	4.68514e-12
GOTERM_BP_DIRECT	GO:0006979~response to oxidative stress	32	7.28929	5.38064e-15	AT5G64100, AT5G19890, AT4G21850, AT2G39040, AT5G17820, AT4G30170, AT4G08770, AT1G08830, AT2G29500, AT4G01970, AT1G34510, AT2G38380, AT3G49120, AT5G24070, AT1G09940, AT4G04830, AT4G21830, AT1G14540, AT1G49570, AT3G11050, AT2G28190, AT3G49960, AT2G37130, AT1G05240, AT1G02930, AT2G05710, AT5G67400, AT4G08780, AT3G32980, AT1G30870, AT4G26010, AT5G13930	348	291	18499	5.84556	2.27551e-12	7.58504e-13	7.50511e-12
GOTERM_BP_DIRECT	GO:0019915~lipid storage	9	2.05011	2.30037e-08	AT3G18570, AT5G56100, AT3G27660, AT4G25140, AT3G01570, AT2G25890, AT4G18550, AT5G51210, AT5G40420	348	27	18499	17.7193	9.82252e-06	2.45564e-06	3.23905e-05
GOTERM_BP_DIRECT	GO:0009664~plant-type cell wall organization	12	2.73349	1.07135e-06	AT5G02260, AT5G64100, AT2G39040, AT5G05290, AT2G37130, AT1G30870, AT5G17820, AT1G05240, AT5G24070, AT4G26010, AT1G12560, AT1G34510	348	91	18499	7.00985	0.000457364	9.14895e-05	0.00150852
GOTERM_BP_DIRECT	GO:0044550~secondary metabolite biosynthetic process	13	2.96128	1.90044e-05	AT2G30750, AT5G42580, AT5G47990, AT1G50520, AT5G42590, AT2G25160, AT5G07990, AT1G64930, AT3G20120, AT2G27000, AT4G15330, AT4G37400, AT1G50560	348	145	18499	4.76589	0.00808211	0.00135158	0.026756
GOTERM_BP_DIRECT	GO:0009813~flavonoid biosynthetic process	13	2.96128	1.90044e-05	AT5G66690, AT3G51240, AT2G22930, AT4G14090, AT2G18570, AT5G20550, AT5G07990, AT5G53990, AT1G50580, AT1G07260, AT2G29750, AT5G13930, AT5G08640	348	145	18499	4.76589	0.00808211	0.00135158	0.026756
GOTERM_BP_DIRECT	GO:0009407~toxin catabolic process	8	1.82232	2.19445e-05	AT4G02520, AT5G17220, AT1G02930, AT1G02940, AT2G02930, AT1G27140, AT2G29440, AT1G17190	348	46	18499	9.24488	0.00932665	0.00133774	0.0308948
GOTERM_BP_DIRECT	GO:0032259~methylation	15	3.41686	4.97512e-05	AT2G45750, AT1G76790, AT1G64970, AT1G21100, AT1G21110, AT3G44860, AT4G26220, AT3G44870, AT1G33800, AT4G33120, AT1G66700, AT5G38020, AT3G25900, AT3G54150, AT1G24735	348	212	18499	3.76118	0.0210202	0.00265202	0.0700299
GOTERM_BP_DIRECT	GO:0010411~xyloglucan metabolic process	7	1.59453	0.000123769	AT4G25810, AT4G30280, AT4G28850, AT3G44990, AT5G13870, AT5G57530, AT4G30290	348	42	18499	8.85967	0.0514803	0.00585531	0.174133
GOTERM_BP_DIRECT	GO:0006749~glutathione metabolic process	8	1.82232	0.000155982	AT4G02520, AT5G17220, AT1G02930, AT1G02940, AT2G02930, AT1G27140, AT2G29440, AT1G17190	348	62	18499	6.8591	0.0644397	0.00663883	0.219409
GOTERM_BP_DIRECT	GO:0008152~metabolic process	17	3.87244	0.000207537	AT5G59130, AT5G59090, AT5G02230, AT5G66690, AT2G22930, AT2G05710, AT4G14090, AT2G18570, AT3G48700, AT3G23790, AT5G54060, AT5G53990, AT4G29690, AT1G50580, AT1G07260, AT2G29750, AT1G47480	348	303	18499	2.98246	0.0848137	0.00802469	0.291829
GOTERM_BP_DIRECT	GO:0010344~seed oilbody biogenesis	4	0.911162	0.000216546	AT3G27660, AT4G25140, AT3G01570, AT5G40420	348	7	18499	30.376	0.088328	0.00767663	0.304477
GOTERM_BP_DIRECT	GO:0019762~glucosinolate catabolic process	6	1.36674	0.00025665	AT3G21370, AT1G66270, AT3G16410, AT2G33070, AT3G16390, AT3G44320	348	31	18499	10.2887	0.103811	0.00839561	0.360772
GOTERM_BP_DIRECT	GO:0010120~camalexin biosynthetic process	4	0.911162	0.000711941	AT2G22330, AT3G26830, AT2G30770, AT4G39950	348	10	18499	21.2632	0.262218	0.0214877	0.997801
GOTERM_BP_DIRECT	GO:0006097~glyoxylate cycle	4	0.911162	0.000711941	AT2G22780, AT3G21720, AT2G05710, AT5G03860	348	10	18499	21.2632	0.262218	0.0214877	0.997801
GOTERM_BP_DIRECT	GO:0009651~response to salt stress	21	4.7836	0.000865367	AT3G09940, AT5G38940, AT5G02020, AT5G44610, AT1G66270, AT4G16260, AT4G11650, AT1G02930, AT3G16350, AT2G05710, AT1G08830, AT3G44540, AT5G22500, AT3G21370, AT2G38380, AT1G77120, AT4G02520, AT1G16850, AT5G63650, AT1G73260, AT2G33380	348	484	18499	2.30644	0.309039	0.0243436	1.21162
GOTERM_BP_DIRECT	GO:0042546~cell wall biogenesis	7	1.59453	0.000890284	AT4G25810, AT4G30280, AT4G28850, AT3G44990, AT5G13870, AT5G57530, AT4G30290	348	60	18499	6.20177	0.316358	0.0234897	1.2463
GOTERM_BP_DIRECT	GO:0080003~thalianol metabolic process	3	0.683371	0.00103949	AT5G47990, AT5G48000, AT5G48010	348	3	18499	53.158	0.358594	0.0257848	1.45375
GOTERM_BP_DIRECT	GO:0052696~flavonoid glucuronidation	9	2.05011	0.00123821	AT5G54060, AT5G53990, AT5G66690, AT1G50580, AT2G22930, AT1G07260, AT2G29750, AT2G18570, AT4G14090	348	112	18499	4.27163	0.410832	0.0289636	1.72942
GOTERM_BP_DIRECT	GO:0016998~cell wall macromolecule catabolic process	5	1.13895	0.00131237	AT3G12500, AT2G43570, AT1G56680, AT1G02360, AT3G44990	348	26	18499	10.2227	0.42922	0.029082	1.83212
GOTERM_BP_DIRECT	GO:0006040~amino sugar metabolic process	4	0.911162	0.00251781	AT3G12500, AT2G43570, AT1G56680, AT1G02360	348	15	18499	14.1755	0.659201	0.0524003	3.48744
GOTERM_BP_DIRECT	GO:0006099~tricarboxylic acid cycle	6	1.36674	0.0030968	AT2G42790, AT2G18450, AT2G22780, AT3G21720, AT2G05710, AT5G03860	348	53	18499	6.01789	0.734033	0.0611184	4.27325
GOTERM_BP_DIRECT	GO:0009617~response to bacterium	8	1.82232	0.00309808	AT2G30750, AT2G22330, AT3G26830, AT1G33960, AT1G62660, AT2G30770, AT4G39950, AT1G11580	348	102	18499	4.16926	0.734179	0.0584466	4.27498
GOTERM_BP_DIRECT	GO:0080028~nitrile biosynthetic process	3	0.683371	0.00337952	AT3G16410, AT2G33070, AT3G16390	348	5	18499	31.8948	0.764372	0.0609137	4.65481
GOTERM_BP_DIRECT	GO:0009682~induced systemic resistance	4	0.911162	0.00433133	AT2G30750, AT2G22330, AT2G30770, AT4G39950	348	18	18499	11.8129	0.843311	0.074322	5.92897
GOTERM_BP_DIRECT	GO:0019761~glucosinolate biosynthetic process	5	1.13895	0.00446386	AT2G22330, AT1G16400, AT1G62570, AT4G39950, AT5G23020	348	36	18499	7.38306	0.851969	0.0735669	6.10514
GOTERM_BP_DIRECT	GO:0009718~anthocyanin-containing compound biosynthetic process	4	0.911162	0.0050727	AT5G54060, AT3G29590, AT4G14090, AT4G22880	348	19	18499	11.1912	0.886	0.0801285	6.91046
GOTERM_BP_DIRECT	GO:0009636~response to toxic substance	6	1.36674	0.00568603	AT5G17220, AT1G02930, AT1G02940, AT2G02930, AT1G27140, AT2G29440	348	61	18499	5.22866	0.91239	0.0862334	7.71524
GOTERM_BP_DIRECT	GO:0050826~response to freezing	4	0.911162	0.00677256	AT3G27660, AT4G25140, AT3G01570, AT5G40420	348	21	18499	10.1253	0.945071	0.0984438	9.12507
GOTERM_BP_DIRECT	GO:0009269~response to desiccation	4	0.911162	0.00677256	AT2G46140, AT2G33380, AT1G48130, AT1G32640	348	21	18499	10.1253	0.945071	0.0984438	9.12507
GOTERM_BP_DIRECT	GO:0001666~response to hypoxia	5	1.13895	0.00776951	AT3G43190, AT5G20830, AT1G77120, AT2G16060, AT4G32690	348	42	18499	6.32834	0.964226	0.108497	10.401
GOTERM_BP_DIRECT	GO:0009607~response to biotic stimulus	5	1.13895	0.0084423	AT1G14950, AT2G44110, AT1G14960, AT1G14940, AT1G70850	348	43	18499	6.18117	0.973222	0.113676	11.2527
GOTERM_BP_DIRECT	GO:0009753~response to jasmonic acid	9	2.05011	0.00933091	AT3G09940, AT1G17750, AT5G09980, AT5G59090, AT3G16350, AT2G24850, AT5G13930, AT4G22880, AT1G32640	348	156	18499	3.06681	0.981739	0.12114	12.366
GOTERM_BP_DIRECT	GO:0006032~chitin catabolic process	4	0.911162	0.0110834	AT3G12500, AT2G43570, AT1G56680, AT1G02360	348	25	18499	8.50529	0.991426	0.138189	14.5238
GOTERM_BP_DIRECT	GO:0009625~response to insect	4	0.911162	0.0123578	AT2G22330, AT3G26830, AT1G73260, AT4G39950	348	26	18499	8.17816	0.995056	0.148622	16.0618
GOTERM_BP_DIRECT	GO:0051603~proteolysis involved in cellular protein catabolic process	7	1.59453	0.0130386	AT2G23010, AT4G01610, AT3G45310, AT3G48340, AT1G29090, AT1G73310, AT5G36180	348	103	18499	3.61268	0.996317	0.151959	16.8728
GOTERM_BP_DIRECT	GO:0009611~response to wounding	10	2.2779	0.0130762	AT2G22330, AT5G22500, AT1G17750, AT5G43580, AT1G73260, AT2G24850, AT5G13930, AT4G22880, AT3G44540, AT1G32640	348	199	18499	2.67126	0.996377	0.148352	16.9174
GOTERM_BP_DIRECT	GO:0006508~proteolysis	18	4.10023	0.0137985	AT5G59130, AT5G59090, AT4G01610, AT1G79310, AT3G48340, AT5G19110, AT1G73310, AT5G19100, AT1G73330, AT5G36180, AT2G23010, AT5G43580, AT2G17760, AT3G08980, AT3G45310, AT1G29090, AT5G10770, AT2G23960	348	500	18499	1.91369	0.997349	0.151941	17.7695
GOTERM_BP_DIRECT	GO:0009845~seed germination	6	1.36674	0.0148351	AT3G27660, AT4G25140, AT3G61850, AT5G42890, AT1G09090, AT5G40420	348	77	18499	4.14219	0.998308	0.158431	18.9782
GOTERM_BP_DIRECT	GO:0019430~removal of superoxide radicals	3	0.683371	0.0204511	AT1G12520, AT2G28190, AT1G08830	348	12	18499	13.2895	0.999853	0.207203	25.2446
GOTERM_BP_DIRECT	GO:0009808~lignin metabolic process	3	0.683371	0.0238736	AT1G33800, AT1G05240, AT5G66690	348	13	18499	12.2672	0.999967	0.232453	28.8395
GOTERM_BP_DIRECT	GO:0006952~defense response	21	4.7836	0.0239278	AT2G22330, AT5G09980, AT3G26830, AT1G64160, AT1G14950, AT1G14960, AT1G14940, AT4G39950, AT3G46730, AT1G80820, AT5G42510, AT2G15220, AT5G43580, AT3G49120, AT2G44110, AT2G19590, AT2G30770, AT1G09090, AT5G05400, AT2G23960, AT1G70850	348	658	18499	1.69653	0.999968	0.227818	28.8951
GOTERM_BP_DIRECT	GO:0019438~aromatic compound biosynthetic process	3	0.683371	0.0313574	AT1G76790, AT1G21100, AT1G21110	348	15	18499	10.6316	0.999999	0.282373	36.1479
GOTERM_BP_DIRECT	GO:0009061~anaerobic respiration	3	0.683371	0.0354004	AT2G18450, AT1G19530, AT5G14760	348	16	18499	9.96713	1	0.306795	39.7998
GOTERM_BP_DIRECT	GO:0030091~protein repair	3	0.683371	0.0354004	AT4G21850, AT4G21830, AT4G04830	348	16	18499	9.96713	1	0.306795	39.7998
GOTERM_BP_DIRECT	GO:0045490~pectin catabolic process	6	1.36674	0.0358934	AT5G04960, AT1G67750, AT3G10710, AT2G47550, AT3G47400, AT1G11580	348	97	18499	3.28813	1	0.304402	40.2316
GOTERM_BP_DIRECT	GO:0006569~tryptophan catabolic process	2	0.455581	0.0371647	AT2G22330, AT4G39950	348	2	18499	53.158	1	0.307564	41.3318
GOTERM_BP_DIRECT	GO:0006801~superoxide metabolic process	2	0.455581	0.0371647	AT2G28190, AT1G08830	348	2	18499	53.158	1	0.307564	41.3318
GOTERM_BP_DIRECT	GO:0009414~response to water deprivation	11	2.50569	0.0383723	AT3G09940, AT3G26830, AT4G38410, AT5G15960, AT2G38530, AT5G20830, AT1G77120, AT1G02930, AT4G39950, AT3G02480, AT1G73330	348	279	18499	2.09584	1	0.310149	42.3595
GOTERM_BP_DIRECT	GO:0009970~cellular response to sulfate starvation	3	0.683371	0.0396325	AT1G55920, AT3G44320, AT1G64660	348	17	18499	9.38083	1	0.312973	43.414
GOTERM_BP_DIRECT	GO:0009684~indoleacetic acid biosynthetic process	3	0.683371	0.0396325	AT2G22330, AT1G16400, AT4G39950	348	17	18499	9.38083	1	0.312973	43.414
GOTERM_BP_DIRECT	GO:0006635~fatty acid beta-oxidation	4	0.911162	0.041289	AT2G42790, AT5G42890, AT3G06860, AT4G16210	348	41	18499	5.18615	1	0.318241	44.7729
GOTERM_BP_DIRECT	GO:0009817~defense response to fungus, incompatible interaction	4	0.911162	0.0492589	AT2G23620, AT4G16260, AT4G37870, AT4G11650	348	44	18499	4.83255	1	0.361963	50.8975
GOTERM_BP_DIRECT	GO:0042545~cell wall modification	5	1.13895	0.0503322	AT5G04960, AT3G10710, AT2G47550, AT3G47400, AT1G11580	348	74	18499	3.59176	1	0.362393	51.6723
GOTERM_BP_DIRECT	GO:0071457~cellular response to ozone	2	0.455581	0.0552273	AT2G28190, AT1G08830	348	3	18499	35.4387	1	0.384404	55.064
GOTERM_BP_DIRECT	GO:0009413~response to flooding	2	0.455581	0.0552273	AT5G20830, AT1G77120	348	3	18499	35.4387	1	0.384404	55.064
GOTERM_BP_DIRECT	GO:0009737~response to abscisic acid	13	2.96128	0.0693091	AT5G50600, AT5G44610, AT3G26830, AT4G38410, AT5G15960, AT2G05710, AT1G73330, AT1G65690, AT1G77120, AT3G28580, AT2G33380, AT3G11050, AT1G32640	348	394	18499	1.75395	1	0.451948	63.6284
GOTERM_BP_DIRECT	GO:0071555~cell wall organization	11	2.50569	0.0730984	AT4G25810, AT4G30280, AT5G45280, AT4G28850, AT1G22880, AT3G44990, AT1G08990, AT1G48930, AT5G13870, AT5G57530, AT4G30290	348	314	18499	1.86222	1	0.463839	65.6589
GOTERM_BP_DIRECT	GO:0042742~defense response to bacterium	10	2.2779	0.0769394	AT2G22330, AT1G17750, AT3G49120, AT2G39050, AT4G02520, AT2G30770, AT1G02930, AT1G73260, AT4G39950, AT1G08830	348	276	18499	1.92602	1	0.475345	67.6092
GOTERM_BP_DIRECT	GO:0005985~sucrose metabolic process	3	0.683371	0.0793289	AT3G43190, AT5G20830, AT1G62660	348	25	18499	6.37897	1	0.479813	68.7701
GOTERM_BP_DIRECT	GO:0006970~response to osmotic stress	6	1.36674	0.0798647	AT1G66270, AT1G65690, AT5G15960, AT5G20830, AT1G77120, AT5G63650	348	122	18499	2.61433	1	0.475968	69.0251
GOTERM_BP_DIRECT	GO:0042542~response to hydrogen peroxide	4	0.911162	0.0806664	AT1G54050, AT1G77120, AT1G73260, AT2G29500	348	54	18499	3.93763	1	0.473398	69.4029
GOTERM_BP_DIRECT	GO:0071456~cellular response to hypoxia	3	0.683371	0.0849098	AT1G14540, AT5G25250, AT1G26380	348	26	18499	6.13362	1	0.485581	71.3326
GOTERM_BP_DIRECT	GO:0009831~plant-type cell wall modification involved in multidimensional cell growth	3	0.683371	0.0849098	AT5G02260, AT5G05290, AT1G12560	348	26	18499	6.13362	1	0.485581	71.3326
GOTERM_BP_DIRECT	GO:0071484~cellular response to light intensity	2	0.455581	0.0903451	AT2G28190, AT1G08830	348	5	18499	21.2632	1	0.50198	73.6392
GOTERM_BP_DIRECT	GO:0019748~secondary metabolic process	3	0.683371	0.0906056	AT2G23010, AT1G73310, AT5G36180	348	27	18499	5.90645	1	0.497104	73.7453
GOTERM_BP_DIRECT	GO:0080167~response to karrikin	6	1.36674	0.0933852	AT5G19520, AT5G05600, AT1G61800, AT5G08640, AT1G61890, AT4G01970	348	128	18499	2.49178	1	0.502272	74.8529

## Sheet: cellular compartment
Category	Term	Count	%	PValue	Genes	List Total	Pop Hits	Pop Total	Fold Enrichment	Bonferroni	Benjamini	FDR
GOTERM_CC_DIRECT	GO:0005576~extracellular region	116	26.4237	8.84552e-23	AT5G19890, AT5G45280, AT5G17820, AT5G23830, AT3G44990, AT2G19970, AT2G47550, AT1G80240, AT5G57530, AT5G51210, AT1G12560, AT5G02260, AT3G43670, AT2G23010, AT5G43580, AT4G25140, AT1G49570, AT4G22230, AT4G30290, AT5G42580, AT1G66270, AT2G41850, AT4G28850, AT1G05240, AT1G22880, AT1G79310, AT2G38530, AT1G74010, AT1G02360, AT1G52070, AT1G73310, AT3G61990, AT4G37400, AT2G39040, AT1G64160, AT5G42590, AT5…	414	2686	25147	2.62324	6.10341e-21	6.10341e-21	9.1274e-20
GOTERM_CC_DIRECT	GO:0005618~cell wall	35	7.97267	2.63228e-10	AT5G64100, AT5G59130, AT5G04960, AT5G05290, AT5G45280, AT5G17820, AT1G18970, AT3G44990, AT5G13870, AT2G47550, AT5G57530, AT1G12560, AT5G02260, AT3G49120, AT3G10710, AT4G30290, AT5G38940, AT4G30280, AT2G41850, AT5G19550, AT5G59090, AT4G16260, AT4G28850, AT1G22880, AT1G18980, AT3G62680, AT1G02930, AT2G05710, AT4G24890, AT1G11580, AT3G32980, AT4G25810, AT3G06860, AT2G16060, AT3G47400	414	588	25147	3.61557	1.81627e-08	9.08137e-09	2.71616e-07
GOTERM_CC_DIRECT	GO:0009505~plant-type cell wall	24	5.46697	1.35217e-08	AT5G64100, AT5G04960, AT2G39040, AT5G45280, AT2G37130, AT1G05240, AT1G22880, AT5G17820, AT1G74010, AT1G54000, AT1G11580, AT2G47550, AT1G80240, AT1G34510, AT2G43570, AT2G38380, AT1G30870, AT3G49120, AT4G37160, AT5G24070, AT4G26010, AT3G10710, AT3G47400, AT5G14450	414	341	25147	4.27506	9.32997e-07	3.10999e-07	1.39526e-05
GOTERM_CC_DIRECT	GO:0012511~monolayer-surrounded lipid storage body	8	1.82232	1.97501e-08	AT3G18570, AT3G27660, AT4G25140, AT3G01570, AT2G25890, AT2G33380, AT5G51210, AT5G40420	414	20	25147	24.2966	1.36275e-06	3.40689e-07	2.03795e-05
GOTERM_CC_DIRECT	GO:0016020~membrane	55	12.5285	1.25389e-05	AT5G19520, AT1G23730, AT5G56100, AT5G05290, AT5G25820, AT5G17820, AT4G37870, AT1G32300, AT5G51210, AT1G12560, AT5G02260, AT1G79450, AT4G25140, AT3G03270, AT4G27860, AT2G25890, AT4G21910, AT2G30750, AT1G43800, AT2G22330, AT5G42580, AT1G66270, AT3G27660, AT1G74010, AT2G39410, AT2G25160, AT4G39950, AT3G32980, AT3G43190, AT3G18570, AT1G16400, AT5G04730, AT3G08980, AT2G46860, AT4G04750, AT4G37400, AT4…	414	1797	25147	1.85909	0.000864813	0.000173023	0.0129377
GOTERM_CC_DIRECT	GO:0043231~intracellular membrane-bounded organelle	14	3.18907	1.34512e-05	AT3G26830, AT5G66690, AT2G22930, AT4G14090, AT2G18570, AT3G21180, AT3G44540, AT5G54060, AT5G53990, AT4G02520, AT1G50580, AT1G07260, AT2G29750, AT2G33380	414	186	25147	4.57194	0.000927709	0.000154678	0.013879
GOTERM_CC_DIRECT	GO:0005829~cytosol	63	14.3508	8.00687e-05	AT5G13990, AT3G21510, AT1G23730, AT4G21850, AT5G45280, AT4G37870, AT2G31390, AT4G16210, AT3G15670, AT1G12520, AT1G17190, AT2G36640, AT1G77120, AT5G17220, AT2G02930, AT2G23960, AT1G22440, AT3G09940, AT2G46140, AT2G23110, AT2G37130, AT1G74010, AT1G11580, AT3G43190, AT3G61990, AT2G16060, AT4G33070, AT3G12500, AT5G65690, AT5G20830, AT1G02940, AT1G55920, AT1G52690, AT1G21100, AT1G08830, AT1G27140, AT1…	414	2309	25147	1.65731	0.00550973	0.000788969	0.0825894
GOTERM_CC_DIRECT	GO:0048046~apoplast	21	4.7836	0.000224205	AT2G46140, AT5G38940, AT4G30280, AT5G59090, AT1G64160, AT4G16260, AT4G28850, AT1G18980, AT1G18970, AT3G44990, AT5G13870, AT5G57530, AT5G42510, AT4G25810, AT2G43570, AT3G49120, AT1G02900, AT4G02520, AT2G02850, AT2G28190, AT4G30290	414	494	25147	2.58213	0.0153528	0.00193212	0.231108
GOTERM_CC_DIRECT	GO:0005737~cytoplasm	100	22.779	0.000509678	AT5G65280, AT5G19890, AT4G21850, AT4G37870, AT4G15390, AT2G26040, AT5G57530, AT5G51210, AT1G17190, AT1G77120, AT5G17220, AT3G50440, AT1G70850, AT4G00680, AT2G23960, AT4G37010, AT1G48660, AT2G23110, AT2G22780, AT2G39050, AT1G01750, AT2G23620, AT5G63560, AT2G16060, AT5G08640, AT5G13930, AT5G60530, AT5G44610, AT5G47980, AT2G32030, AT5G61160, AT5G40590, AT5G58320, AT1G08830, AT3G49620, AT3G32030, AT1…	414	4407	25147	1.3783	0.0345653	0.0039009	0.524673
GOTERM_CC_DIRECT	GO:0005783~endoplasmic reticulum	25	5.69476	0.000659281	AT3G26830, AT5G42590, AT4G15393, AT1G67360, AT1G26380, AT4G02520, AT3G28580, AT4G27860, AT5G48000, AT5G24140, AT2G33380, AT5G42600, AT1G50520, AT5G47990, AT1G66270, AT4G21570, AT1G74010, AT2G39410, AT3G48340, AT1G16400, AT3G61990, AT1G16850, AT2G27000, AT3G17520, AT5G13930	414	703	25147	2.16008	0.0444856	0.0045402	0.678204
GOTERM_CC_DIRECT	GO:0009514~glyoxysome	4	0.911162	0.00139906	AT2G22780, AT3G06860, AT3G21720, AT5G03860	414	14	25147	17.3547	0.0920835	0.00874363	1.43427
GOTERM_CC_DIRECT	GO:0005622~intracellular	21	4.7836	0.00442316	AT3G12500, AT3G21510, AT5G23830, AT1G02360, AT5G47220, AT5G47960, AT5G10260, AT3G49860, AT5G01330, AT1G56680, AT2G43570, AT1G01750, AT4G18430, AT2G22290, AT3G23230, AT3G55940, AT1G02900, AT4G36640, AT4G03330, AT4G00680, AT2G26370	414	634	25147	2.01194	0.263521	0.0251675	4.47119
GOTERM_CC_DIRECT	GO:0005764~lysosome	4	0.911162	0.0226193	AT4G01610, AT3G45310, AT3G48340, AT1G29090	414	37	25147	6.56665	0.793747	0.114351	21.0283
GOTERM_CC_DIRECT	GO:0005811~lipid particle	3	0.683371	0.0346124	AT5G50600, AT1G67360, AT2G47780	414	18	25147	10.1236	0.912013	0.159377	30.4748
GOTERM_CC_DIRECT	GO:0005773~vacuole	17	3.87244	0.0579098	AT3G12500, AT1G66270, AT4G01610, AT1G62660, AT1G54000, AT1G02930, AT1G67360, AT4G08770, AT4G08780, AT3G32980, AT2G38380, AT3G43190, AT3G49120, AT4G02520, AT5G25250, AT2G33380, AT3G17520	414	629	25147	1.64166	0.983693	0.239979	45.9658
GOTERM_CC_DIRECT	GO:0005615~extracellular space	6	1.36674	0.0669632	AT2G25240, AT4G01610, AT4G16260, AT3G45310, AT3G48340, AT1G29090	414	132	25147	2.76098	0.991624	0.258368	51.0902

## Sheet: molecular function
Category	Term	Count	%	PValue	Genes	List Total	Pop Hits	Pop Total	Fold Enrichment	Bonferroni	Benjamini	FDR
GOTERM_MF_DIRECT	GO:0020037~heme binding	47	10.7062	3.36669e-24	AT5G19890, AT5G64100, AT3G26830, AT2G39040, AT5G42590, AT5G17820, AT4G30170, AT4G15393, AT4G08770, AT1G34510, AT4G32690, AT2G38380, AT2G34500, AT3G49120, AT5G24070, AT1G64930, AT3G20120, AT5G48000, AT1G14540, AT4G15330, AT1G49570, AT2G30750, AT2G22330, AT1G50520, AT5G47990, AT5G42580, AT3G49960, AT1G34540, AT2G37130, AT1G05240, AT4G39480, AT2G25160, AT4G39950, AT2G21910, AT4G08780, AT5G67400, AT5…	337	386	18171	6.56537	1.02684e-21	1.02684e-21	4.51026e-21
GOTERM_MF_DIRECT	GO:0004601~peroxidase activity	22	5.01139	3.3572e-15	AT5G19890, AT5G64100, AT3G49960, AT2G39040, AT2G37130, AT1G05240, AT5G17820, AT4G30170, AT4G08770, AT5G67400, AT4G08780, AT1G34510, AT3G32980, AT2G38380, AT1G30870, AT3G49120, AT5G24070, AT4G02520, AT4G26010, AT1G14540, AT1G09090, AT1G49570	337	117	18171	10.1388	1.01585e-12	5.07927e-13	4.4631e-12
GOTERM_MF_DIRECT	GO:0019825~oxygen binding	26	5.92255	1.71359e-12	AT3G26830, AT5G42590, AT4G32690, AT2G34500, AT1G64930, AT3G20120, AT5G48000, AT4G15330, AT2G30750, AT2G22330, AT5G47990, AT5G42580, AT1G50520, AT1G34540, AT4G39480, AT2G25160, AT4G39950, AT2G21910, AT5G07990, AT1G16400, AT2G30770, AT2G27000, AT2G16060, AT1G12740, AT4G37400, AT1G50560	337	234	18171	5.9911	5.22657e-10	1.74219e-10	2.2957e-09
GOTERM_MF_DIRECT	GO:0005506~iron ion binding	26	5.92255	3.99245e-09	AT3G26830, AT5G42590, AT4G15393, AT2G34500, AT1G64930, AT3G20120, AT5G48000, AT4G15330, AT3G11050, AT2G30750, AT2G22330, AT5G47990, AT5G42580, AT1G50520, AT1G34540, AT4G39480, AT2G25160, AT4G39950, AT2G21910, AT5G07990, AT1G16400, AT2G30770, AT2G27000, AT1G12740, AT4G37400, AT1G50560	337	336	18171	4.17237	1.2177e-06	3.04424e-07	5.34857e-06
GOTERM_MF_DIRECT	GO:0016709~oxidoreductase activity, acting on paired donors, with incorporation or reduction of molecular oxygen, NAD(P)H as one donor, and incorporation of one atom of oxygen	17	3.87244	1.73378e-08	AT2G30750, AT2G22330, AT1G50520, AT5G42580, AT5G47990, AT3G26830, AT5G42590, AT2G25160, AT4G39950, AT1G16400, AT1G64930, AT3G20120, AT2G30770, AT2G27000, AT4G15330, AT4G37400, AT1G50560	337	149	18171	6.15193	5.28801e-06	1.0576e-06	2.32269e-05
GOTERM_MF_DIRECT	GO:0004497~monooxygenase activity	14	3.18907	2.07287e-05	AT2G30750, AT2G22330, AT5G47990, AT3G26830, AT1G34540, AT1G62570, AT4G39480, AT4G15393, AT2G21910, AT5G07990, AT2G34500, AT5G48000, AT1G12740, AT4G37400	337	173	18171	4.36346	0.00630237	0.00105316	0.027766
GOTERM_MF_DIRECT	GO:0016762~xyloglucan:xyloglucosyl transferase activity	7	1.59453	2.7776e-05	AT4G25810, AT4G30280, AT4G28850, AT3G44990, AT5G13870, AT5G57530, AT4G30290	337	33	18171	11.4376	0.008436	0.00120952	0.0372042
GOTERM_MF_DIRECT	GO:0008171~O-methyltransferase activity	6	1.36674	6.67873e-05	AT1G76790, AT4G26220, AT3G61990, AT1G21100, AT1G24735, AT1G21110	337	24	18171	13.48	0.0201647	0.00254311	0.089436
GOTERM_MF_DIRECT	GO:0016705~oxidoreductase activity, acting on paired donors, with incorporation or reduction of molecular oxygen	12	2.73349	9.85427e-05	AT2G30750, AT2G22330, AT5G07990, AT5G47990, AT2G34500, AT3G26830, AT1G34540, AT4G39480, AT5G48000, AT4G15393, AT1G12740, AT2G21910	337	148	18171	4.37188	0.0296098	0.0033341	0.131934
GOTERM_MF_DIRECT	GO:0004364~glutathione transferase activity	8	1.82232	0.000142688	AT4G02520, AT5G17220, AT1G02930, AT1G02940, AT2G02930, AT1G27140, AT2G29440, AT1G17190	337	62	18171	6.9574	0.0425895	0.00434284	0.190986
GOTERM_MF_DIRECT	GO:0016798~hydrolase activity, acting on glycosyl bonds	7	1.59453	0.00019194	AT4G25810, AT4G30280, AT4G28850, AT3G44990, AT5G13870, AT5G57530, AT4G30290	337	46	18171	8.2052	0.0568664	0.00530835	0.256831
GOTERM_MF_DIRECT	GO:0033946~xyloglucan-specific endo-beta-1,4-glucanase activity	4	0.911162	0.000207549	AT4G30280, AT3G44990, AT5G57530, AT4G30290	337	7	18171	30.8114	0.0613465	0.00526185	0.277689
GOTERM_MF_DIRECT	GO:0008757~S-adenosylmethionine-dependent methyltransferase activity	10	2.2779	0.000286345	AT2G45750, AT3G44870, AT4G33120, AT5G38020, AT1G66700, AT1G64970, AT3G54150, AT1G21100, AT1G21110, AT3G44860	337	115	18171	4.68869	0.0836417	0.00669655	0.382928
GOTERM_MF_DIRECT	GO:0080044~quercetin 7-O-glucosyltransferase activity	9	2.05011	0.000740029	AT5G54060, AT5G53990, AT5G66690, AT1G50580, AT2G22930, AT1G07260, AT2G29750, AT2G18570, AT4G14090	337	105	18171	4.6217	0.202116	0.0159987	0.98686
GOTERM_MF_DIRECT	GO:0004553~hydrolase activity, hydrolyzing O-glycosyl compounds	14	3.18907	0.000750167	AT1G66270, AT4G30280, AT4G28850, AT4G16260, AT1G13830, AT1G22880, AT1G62660, AT1G48930, AT5G13870, AT5G57530, AT4G25810, AT3G21370, AT5G18220, AT4G30290	337	248	18171	3.04386	0.204582	0.0151433	1.00032
GOTERM_MF_DIRECT	GO:0080043~quercetin 3-O-glucosyltransferase activity	9	2.05011	0.000838064	AT5G54060, AT5G53990, AT5G66690, AT1G50580, AT2G22930, AT1G07260, AT2G29750, AT2G18570, AT4G14090	337	107	18171	4.53532	0.225639	0.0158553	1.11692
GOTERM_MF_DIRECT	GO:0046872~metal ion binding	48	10.9339	0.00108008	AT5G19890, AT5G64100, AT4G21850, AT2G39040, AT5G17820, AT4G30170, AT2G44790, AT4G08770, AT1G08830, AT1G34510, AT4G32690, AT3G49620, AT2G38380, AT4G26220, AT2G27510, AT5G05600, AT3G61850, AT1G67750, AT3G49120, AT5G24070, AT1G06620, AT4G04830, AT1G14540, AT2G02850, AT4G21830, AT1G49570, AT2G28190, AT1G43800, AT3G49960, AT2G37130, AT1G05240, AT2G01880, AT3G51240, AT3G21180, AT4G24890, AT5G20550, AT4…	337	1606	18171	1.61155	0.280791	0.0192017	1.43731
GOTERM_MF_DIRECT	GO:0050660~flavin adenine dinucleotide binding	9	2.05011	0.00382332	AT3G09940, AT2G18450, AT1G30700, AT1G62570, AT1G32300, AT5G24140, AT1G26390, AT1G26380, AT1G30760	337	136	18171	3.56823	0.68912	0.0628465	5.00235
GOTERM_MF_DIRECT	GO:0080039~xyloglucan endotransglucosylase activity	3	0.683371	0.00486821	AT4G30280, AT5G57530, AT4G30290	337	6	18171	26.9599	0.774273	0.0753485	6.32859
GOTERM_MF_DIRECT	GO:0030246~carbohydrate binding	12	2.73349	0.00723554	AT1G61370, AT2G39050, AT3G16410, AT1G16905, AT5G35940, AT1G52070, AT5G35950, AT1G52060, AT1G52050, AT2G33070, AT3G16390, AT1G33790	337	251	18171	2.57784	0.890832	0.104831	9.27024
GOTERM_MF_DIRECT	GO:0004568~chitinase activity	4	0.911162	0.0106612	AT3G12500, AT2G43570, AT1G56680, AT1G02360	337	25	18171	8.62718	0.96196	0.144161	13.3759
GOTERM_MF_DIRECT	GO:0016758~transferase activity, transferring hexosyl groups	9	2.05011	0.0114172	AT5G54060, AT5G53990, AT5G66690, AT1G50580, AT2G22930, AT1G07260, AT2G29750, AT2G18570, AT4G14090	337	164	18171	2.95902	0.969871	0.147169	14.2584
GOTERM_MF_DIRECT	GO:0016747~transferase activity, transferring acyl groups other than amino-acyl groups	7	1.59453	0.0122155	AT2G23010, AT5G47980, AT4G15390, AT1G73310, AT5G47950, AT5G13930, AT5G36180	337	103	18171	3.66446	0.976451	0.150397	15.1814
GOTERM_MF_DIRECT	GO:0033743~peptide-methionine (R)-S-oxide reductase activity	3	0.683371	0.0139075	AT4G21850, AT4G21830, AT4G04830	337	10	18171	16.176	0.98604	0.163042	17.1072
GOTERM_MF_DIRECT	GO:0016491~oxidoreductase activity	15	3.41686	0.0144198	AT5G50600, AT3G09940, AT5G01670, AT4G23420, AT3G51240, AT1G55290, AT3G49620, AT2G27510, AT1G54870, AT1G06620, AT5G14760, AT2G19590, AT5G08640, AT5G53090, AT3G29250	337	391	18171	2.06854	0.988086	0.16239	17.6823
GOTERM_MF_DIRECT	GO:0031418~L-ascorbic acid binding	4	0.911162	0.017588	AT3G51240, AT2G19590, AT5G08640, AT4G22880	337	30	18171	7.18932	0.995538	0.18792	21.1575
GOTERM_MF_DIRECT	GO:0030599~pectinesterase activity	6	1.36674	0.0206789	AT5G04960, AT4G37160, AT3G10710, AT2G47550, AT3G47400, AT1G11580	337	85	18171	3.80611	0.998293	0.210254	24.4166
GOTERM_MF_DIRECT	GO:0009055~electron carrier activity	9	2.05011	0.0233378	AT2G18450, AT1G30700, AT2G27510, AT5G14760, AT2G44790, AT2G02850, AT1G26390, AT1G26380, AT1G30760	337	187	18171	2.59507	0.999255	0.226808	27.1199
GOTERM_MF_DIRECT	GO:0045330~aspartyl esterase activity	5	1.13895	0.0354403	AT5G04960, AT3G10710, AT2G47550, AT3G47400, AT1G11580	337	67	18171	4.02387	0.999983	0.315796	38.3317
GOTERM_MF_DIRECT	GO:0008234~cysteine-type peptidase activity	5	1.13895	0.0354403	AT4G01610, AT1G79310, AT3G45310, AT3G48340, AT1G29090	337	67	18171	4.02387	0.999983	0.315796	38.3317
GOTERM_MF_DIRECT	GO:0005507~copper ion binding	10	2.2779	0.0359586	AT3G43670, AT5G19550, AT4G37160, AT2G44790, AT2G02850, AT1G02930, AT2G05710, AT2G28190, AT1G08830, AT3G29250	337	241	18171	2.23734	0.999986	0.310862	38.7742
GOTERM_MF_DIRECT	GO:2001147~camalexin binding	2	0.455581	0.0366411	AT4G02520, AT1G02930	337	2	18171	53.9199	0.999989	0.307378	39.3523
GOTERM_MF_DIRECT	GO:0045486~naringenin 3-dioxygenase activity	2	0.455581	0.0366411	AT3G51240, AT5G08640	337	2	18171	53.9199	0.999989	0.307378	39.3523
GOTERM_MF_DIRECT	GO:0004612~phosphoenolpyruvate carboxykinase (ATP) activity	2	0.455581	0.0366411	AT5G65690, AT4G37870	337	2	18171	53.9199	0.999989	0.307378	39.3523
GOTERM_MF_DIRECT	GO:2001227~quercitrin binding	2	0.455581	0.0366411	AT4G02520, AT1G02930	337	2	18171	53.9199	0.999989	0.307378	39.3523
GOTERM_MF_DIRECT	GO:0008194~UDP-glycosyltransferase activity	6	1.36674	0.0394833	AT3G43190, AT5G66690, AT5G20830, AT1G07260, AT2G29750, AT4G14090	337	101	18171	3.20316	0.999995	0.318838	41.706
GOTERM_MF_DIRECT	GO:0004022~alcohol dehydrogenase (NAD) activity	3	0.683371	0.0429186	AT1G77120, AT4G22110, AT1G22440	337	18	18171	8.98665	0.999998	0.333314	44.438
GOTERM_MF_DIRECT	GO:0050062~long-chain-fatty-acyl-CoA reductase activity	2	0.455581	0.0544565	AT5G22500, AT3G44540	337	3	18171	35.9466	1	0.39487	52.7706
GOTERM_MF_DIRECT	GO:0005344~oxygen transporter activity	2	0.455581	0.0544565	AT2G16060, AT4G32690	337	3	18171	35.9466	1	0.39487	52.7706
GOTERM_MF_DIRECT	GO:0008061~chitin binding	3	0.683371	0.0720535	AT3G12500, AT2G43570, AT1G56680	337	24	18171	6.73999	1	0.478823	63.279
GOTERM_MF_DIRECT	GO:0004197~cysteine-type endopeptidase activity	4	0.911162	0.0746646	AT4G01610, AT3G45310, AT3G48340, AT1G29090	337	53	18171	4.06943	1	0.481822	64.6394
GOTERM_MF_DIRECT	GO:0004300~enoyl-CoA hydratase activity	2	0.455581	0.0891079	AT3G06860, AT4G16210	337	5	18171	21.568	1	0.536685	71.3588
GOTERM_MF_DIRECT	GO:0051213~dioxygenase activity	5	1.13895	0.0966482	AT3G49620, AT5G05600, AT4G22880, AT5G20550, AT1G55290	337	94	18171	2.86808	1	0.557724	74.3771
